# Supplementary material
Source: publisher figshare collection journal article supplement (https://diabetesjournals.figshare.com/ndownloader/files/27874764)
Supplement: Supplementary file 1 [file 27874764]

## Sheet: pancreatic beta like cells Met
Table S1: Summary of gene expression in metformin-treated pancreatic beta-like cells.
		SAMPLES
		D0_a	D13_a	D13Met_a	D20_a	D20Met_a	D35_a	D35Met_a	D0_b	D13_b	D13Met_b	D20_b	D20Met_b	D35_b	D35Met_b	D0_c	D13Met_c	D20_c	D20Met_c	D35_c	D35Met_c
GENE	Symbol	RHO720.sorted.bam.abund.txt	RHO721.sorted.bam.abund.txt	RHO722.sorted.bam.abund.txt	RHO723.sorted.bam.abund.txt	RHO724.sorted.bam.abund.txt	RHO725.sorted.bam.abund.txt	RHO726.sorted.bam.abund.txt	RHO727.sorted.bam.abund.txt	RHO728.sorted.bam.abund.txt	RHO729.sorted.bam.abund.txt	RHO730.sorted.bam.abund.txt	RHO731.sorted.bam.abund.txt	RHO732.sorted.bam.abund.txt	RHO733.sorted.bam.abund.txt	RHO734.sorted.bam.abund.txt	RHO735.sorted.bam.abund.txt	RHO736.sorted.bam.abund.txt	RHO737.sorted.bam.abund.txt	RHO738.sorted.bam.abund.txt	RHO739.sorted.bam.abund.txt
ENSG00000268895	A1BG-AS1	0.323245	0.421315	0.249107	0.557755	0.370554	0.212023	0.366483	0.516237	0.299309	0.297254	0.145623	0.099387	0.281944	0.213602	0.387977	0.314653	0.129715	0.33834	0.109353	0.175891
ENSG00000148584	A1CF	0	0.010453	0	0.353381	0.193684	0.829805	0.132365	0	0	0.024539	0.219906	0.155836	1.10072	0.326495	0	0	0.345051	0.122857	1.18006	0.325527
ENSG00000175899	A2M	0.102881	0.17446	2.41013	0.061148	0.11774	25.9809	24.8702	0.38804	0.048022	1.39552	0.755619	0.099308	15.4273	9.91947	1.08555	2.00783	0.046167	0.267781	23.6126	7.87547
ENSG00000245105	A2M-AS1	0.140326	1.14621	1.88947	2.03821	1.96993	0.532859	0.501458	0.205751	1.94732	3.18045	2.72385	2.76222	0.43699	0.656957	0.543202	1.47344	2.55877	2.00237	0.528157	0.228409
ENSG00000166535	A2ML1	1.09644	0	0.017126	0	0	0.036429	0	0.834255	0	0	0	0	0.043488	0.024315	1.05828	0.02121	0	0	0.042999	0
ENSG00000094914	AAAS	11.4744	4.74394	6.2988	0.865434	3.62388	0.386274	1.50051	11.7415	5.73571	6.70381	2.16473	2.85011	0.537636	0.563228	10.0453	5.51486	0.328658	0.898483	1.1569	0.308696
ENSG00000081760	AACS	1.25303	0.418497	1.24985	0.361792	1.17168	0.173305	0.141344	2.01035	0.556956	0.433847	0.293267	0.217312	0.20207	0.077853	2.32304	0.372777	0.227887	0.232884	0.151565	0.059014
ENSG00000250420	AACSP1	0.140994	0.106887	0.085683	0.133983	0.101928	0.061185	0.020446	0.097859	0.183606	0.091493	0.132198	0.095651	0.022208	0.026728	0.156412	0.143781	0.180513	0.160098	0.012532	0
ENSG00000114771	AADAC	0	0	0	0	0	1.61975	0.760871	0	0	0	0	0	3.0166	0.735556	0	0	0	0	2.26751	1.8065
ENSG00000109576	AADAT	1.91728	11.8719	7.34361	7.53141	3.60225	0.820089	0.664644	2.87823	9.31302	9.90878	7.81622	6.81427	0.699605	0.669336	2.66119	10.464	8.17613	6.85373	1.51209	0.389578
ENSG00000158122	AAED1	3.43565	3.99235	4.27579	1.33787	0.978989	1.22235	1.31502	3.61764	3.55503	4.5816	1.86059	2.24192	1.99463	1.30728	4.35204	4.46224	1.69258	1.5306	1.5174	1.81477
ENSG00000103591	AAGAB	18.091	36.2597	38.5259	18.3766	14.8695	10.0984	14.9688	21.0171	39.6349	40.6598	21.1514	15.3973	12.421	14.9669	26.7951	41.0386	25.3645	19.7518	9.62048	11.0643
ENSG00000115977	AAK1	2.40292	4.35972	1.81854	1.01245	1.70903	1.46897	0.574441	4.78787	0.4665	0.661736	2.12501	1.23573	1.34723	1.60804	1.18678	0.54971	1.65879	1.93363	1.72096	0.556477
ENSG00000087884	AAMDC	9.27304	4.16731	3.54436	0.162928	0.343865	2.20002	2.98927	12.3244	0.377779	4.8948	0.239943	0.184333	0.162778	1.51987	9.06613	0.428182	0.119528	0.085699	0.903187	0.072041
ENSG00000127837	AAMP	14.52	9.024	7.66256	6.80283	6.28655	1.77107	2.0302	19.4539	9.31072	4.28404	1.35446	3.80707	2.01095	2.42742	14.2311	6.71747	2.07861	3.2448	0.998831	0.764261
ENSG00000131043	AAR2	4.87484	5.22987	6.27734	5.55492	4.24905	1.27565	1.18028	6.60733	4.23508	3.27497	2.72818	2.99761	1.25068	0.745091	5.48272	3.86299	1.91549	2.37093	0.932761	0.671804
ENSG00000205002	AARD	0.297702	0.873131	0.94513	0.217283	0.168464	0.089627	0.040319	0.616128	1.21972	0.874459	0.163618	0.131727	0.177827	0.037129	0.446387	1.28429	0.192285	0.443693	0.05005	0.135998
ENSG00000090861	AARS	26.626	13.1593	10.8149	9.40601	12.5919	5.24024	5.52535	37.4774	10.9725	7.9075	6.40683	6.73329	6.03339	5.02693	35.5072	11.6409	3.50058	8.40472	3.56342	3.00057
ENSG00000124608	AARS2	2.16673	1.60015	1.67496	0.759224	1.15893	0.316554	0.621423	2.9334	1.59645	1.24033	0.2782	0.45414	0.483126	0.399874	2.5008	1.01146	0.368661	0.951563	0.25869	0.291386
ENSG00000157426	AASDH	6.76969	7.00969	7.08471	5.72376	6.52081	2.28678	2.09836	7.44873	9.91084	9.89606	7.94452	7.06131	2.87544	2.57967	8.22931	9.91548	7.90541	7.33183	3.35705	2.39778
ENSG00000149313	AASDHPPT	16.3098	20.74	26.2642	82.634	72.754	3.83431	10.4886	20.2565	32.3231	37.4097	113.608	96.6166	5.2069	4.2572	20.7132	25.0952	78.7589	102.789	5.34783	4.03722
ENSG00000008311	AASS	72.9009	23.279	26.4882	4.14393	4.85459	2.11686	3.12029	75.3103	25.8123	29.2241	4.63901	6.24021	2.43464	2.5466	64.8478	24.2452	4.20798	5.13476	2.15082	1.7583
ENSG00000275700	AATF	13.2687	7.26031	10.3492	2.29137	2.09409	1.42663	0.680409	14.9601	5.32147	4.80314	3.14577	1.93069	1.01511	1.0369	13.9628	5.17582	1.81746	5.43571	0.977192	0.607007
ENSG00000183044	ABAT	0.617675	3.28011	2.2574	2.61937	6.61206	0.577124	0.848549	0.67702	4.03873	4.62043	2.54372	4.15644	0.612966	1.14319	0.64672	2.82099	2.13543	6.86756	0.655837	0.609629
ENSG00000165029	ABCA1	10.0074	2.49962	1.80965	2.53593	2.76244	2.96144	3.18708	10.1576	2.05952	2.2127	2.33808	3.16815	2.93507	2.43468	8.75038	1.85772	2.20794	3.62567	3.11592	2.41226
ENSG00000154263	ABCA10	0	0.08652	0.074846	1.07989	1.06921	1.14743	0.512919	0	0.165688	0.053999	1.65065	1.5592	0.641814	0.305216	0	0.040704	0.709714	0.876817	2.25637	0.300521
ENSG00000251595	ABCA11P	2.50951	3.11052	4.16684	3.96943	2.45602	2.51549	1.00358	2.63669	4.77553	6.82188	1.6436	3.38983	1.77583	0.760902	2.89858	5.7813	3.17298	2.38281	2.11243	1.20774
ENSG00000144452	ABCA12	0	0.026119	0.017258	0.011603	0.013911	0.093231	0.014303	0	0.011457	0.018091	0.01163	0.011759	0.037842	0.027678	0.002206	0.034006	0.014617	0.013086	0.049943	0.022591
ENSG00000179869	ABCA13	0	0.109474	0.145444	0.04142	0.099854	0.13657	0.097771	0	0.029478	0.091376	0.096806	0.136203	0.122786	0.096438	0.010499	0.099457	0.104183	0.168239	0.111519	0.079049
ENSG00000107331	ABCA2	0.140031	0.28634	0.087326	0.066352	0.36788	0.009435	0.378032	0.100907	0.296874	0.0307	0.281911	0.054729	0.028008	0.07778	0.128728	0	0	0.031017	0.021074	0.122877
ENSG00000167972	ABCA3	0.442699	0.52151	0.541226	0.954467	1.70356	0.164693	0.287617	0.478845	0.38347	0.372071	0.549738	0.529543	0.039346	0.10305	0.465413	0.347594	0.243948	0.689745	0.031248	0.071088
ENSG00000198691	ABCA4	0	0.055063	0.026123	0	0.032146	0.163007	0.141951	0.0235	0.224591	0.012849	0	0.035229	0.259308	0.226182	0	0.076135	0	0.026094	0.105443	0.102305
ENSG00000154265	ABCA5	1.20671	1.41004	0.382724	1.55251	2.36342	3.16425	0.719213	0.306707	0.353581	0.358083	1.83764	2.50937	1.80542	1.80893	0.627153	0.386722	3.81833	2.4253	5.30484	1.63052
ENSG00000154262	ABCA6	0	0.014187	0.025408	0.110092	0.070141	0.670325	0.069902	0	0.0147	0.00775	0.093269	0.091607	0.290541	0.074234	0	0.048484	0.182348	0.07571	1.03045	0.055877
ENSG00000141338	ABCA8	0	0.016707	0.011333	0.092069	0.090409	1.16537	0.057314	0	0.018502	0.062672	0.048003	0.096361	1.1277	0.079813	0.005379	0.029902	0.152852	0.19652	1.29309	0.851384
ENSG00000154258	ABCA9	0.008994	0.050831	0.06331	0.138143	0.205891	1.12284	0.20242	0.009235	0.063203	0.090875	0.184398	0.567329	1.21451	0.273606	0	0.015145	0.189645	0.207634	1.02199	0.238939
ENSG00000085563	ABCB1	0.053154	0.187737	0.10973	0.11317	0.12502	3.51255	1.85384	0.358624	0.178255	0.22072	0.09093	0.055179	3.823	2.84334	0.103309	0.119351	0.022402	0.020503	3.996	2.82329
ENSG00000135776	ABCB10	5.35688	6.81424	6.53594	5.91548	4.74032	3.46278	3.25672	5.87472	5.88798	6.43652	6.29926	4.58236	3.71693	2.3766	4.97102	4.55992	6.26712	4.93555	4.03418	2.72949
ENSG00000005471	ABCB4	0.160375	0.926071	0.636932	0.271211	0.224104	0.142514	0.147201	0.056941	2.47597	1.73098	0.532763	0.364617	0.880198	0.305256	0.051	1.56484	0.215994	0.788969	0.189765	0.125173
ENSG00000131269	ABCB7	23.2117	15.7638	16.2365	12.1746	12.9462	4.95681	3.63521	26.5597	16.0875	20.1526	11.4494	15.7151	6.03114	3.91697	29.3822	17.6439	14.8469	18.0158	5.42334	4.90874
ENSG00000197150	ABCB8	0.250485	0.334161	0.242693	0.145228	1.37437	0.166122	0.08733	0.156464	0.227447	0.675345	0.145431	0.129436	0.103855	0.056595	0.306687	0.259783	0.014073	0.139374	0.061939	0.045122
ENSG00000150967	ABCB9	0.117545	0.056076	0.07118	0.945898	0.9313	0.082939	0.03943	0.321973	0.073707	0.660099	0.019898	0.617632	0.012154	0.277043	0.05422	0.025794	1.1265	0.058238	0.025435	0.008762
ENSG00000103222	ABCC1	5.11006	1.86602	1.41783	1.19976	1.21702	1.90121	1.26138	5.37221	1.46437	1.31759	0.624745	0.907863	1.48595	1.3203	7.38013	1.74274	0.646145	0.988103	1.72715	1.00227
ENSG00000124574	ABCC10	0.76704	0.368336	0.29991	0.157005	0.601705	0.179039	0.29586	1.22403	0.855731	0.291952	0.179529	0.634456	0.786326	0.445369	0.659804	0.260308	0.122128	0.140806	0.149945	0.243256
ENSG00000023839	ABCC2	0.049194	2.50602	1.28219	0.379268	0.286442	1.02583	1.13288	0.034066	0.679813	1.19405	0.084295	0.252111	0.947243	0.41724	0.1497	1.11385	0.191216	0.281984	0.579588	0.570131
ENSG00000125257	ABCC4	1.45063	3.3561	2.9425	1.71089	1.68376	5.94618	2.81752	1.80171	8.09295	3.46049	1.53294	1.65039	2.19878	9.14656	1.95554	3.73389	1.36665	2.20093	2.03388	2.38317
ENSG00000114770	ABCC5	1.56661	4.37775	1.54391	1.81385	5.39284	2.42834	1.31723	4.23343	4.39377	4.41595	1.64359	8.72942	0.810354	1.15414	1.5869	1.50687	1.47754	5.40767	0.840987	0.360117
ENSG00000006071	ABCC8	0.060107	0.124929	0.034433	0.096555	0.20379	0.629641	0.068404	0.062956	0.076726	0.086918	0.228272	0.163754	0.876077	0.300521	0.073574	0	0.117273	0.245706	0.358354	0.068604
ENSG00000069431	ABCC9	0.01606	0.015828	0.040083	0.051905	0.029953	3.49989	1.55732	0	0.008119	0.046447	0	0.025217	3.03625	2.04845	0	0.013658	0.062668	0.028155	2.71405	1.23037
ENSG00000173208	ABCD2	0.016328	0.094797	0.26008	0.021108	0.020368	0.296038	0.568784	0.016932	0.126455	0.204593	0.021158	0.118166	0.361369	0.46084	0	0.218046	0.063818	0.094093	0.273453	0.428247
ENSG00000117528	ABCD3	7.82268	16.4095	17.3945	8.40886	8.58492	2.97633	1.70307	11.6589	8.91892	3.56554	3.87552	4.2968	3.7534	2.01299	2.47815	4.14098	3.41342	13.4308	3.41608	1.91691
ENSG00000119688	ABCD4	3.28856	1.39355	1.524	0.906524	1.16342	0.728907	0.678854	7.23472	2.22718	1.03277	1.1042	1.03071	0.622388	0.869201	6.58131	1.56668	0.549915	0.6563	0.476457	0.331959
ENSG00000164163	ABCE1	60.8492	51.969	54.5981	25.9185	20.861	11.9561	11.162	58.2298	61.7878	68.7778	34.1536	32.8831	15.7653	10.9133	62.9331	54.2394	39.0563	29.7312	13.9288	12.2923
ENSG00000204574	ABCF1	22.0228	15.0748	11.0696	5.28211	8.73157	4.46409	5.98188	22.7736	16.2772	8.0681	3.46332	4.65248	4.00222	6.05284	18.2071	16.5244	2.27086	5.64567	1.72894	4.60287
ENSG00000033050	ABCF2	8.49345	12.5434	9.21613	5.74452	6.36984	2.38774	3.15953	12.6365	10.4772	8.35221	3.79666	5.47472	2.48631	1.73962	15.7654	9.06201	2.69978	6.03802	1.63588	1.26733
ENSG00000161204	ABCF3	2.9492	2.30535	1.9667	1.54631	2.99765	0.435418	0.407484	2.49659	2.54008	1.45827	0.737521	1.09651	0.648563	0.483636	2.89041	2.42781	0.35401	0.944172	0.593755	0.194297
ENSG00000160179	ABCG1	0.108028	0.029813	0.033796	0.306781	0.238781	0.083904	0.099829	0.097465	0.030732	0.03595	0.253056	0.231584	0.048053	0.101831	0.077885	0	0.176253	0.312805	0.073991	0.062217
ENSG00000118777	ABCG2	0.036046	0.009159	0.008283	1.96441	1.46464	8.33331	5.76502	0.025867	0.008147	0.013737	0.164161	5.31856	6.49514	3.00866	0.029872	0.018092	0.265679	0.219071	6.60429	0.277083
ENSG00000144827	ABHD10	9.79845	23.4038	22.7123	21.2535	16.4416	5.71516	5.13944	11.0516	28.3869	23.5434	20.0512	21.9535	7.50429	6.29054	10.1228	17.0059	24.7957	26.8579	5.66125	4.98984
ENSG00000106077	ABHD11	2.53795	1.22026	1.11486	0.457346	1.13724	0.424292	0.644139	3.08271	0.768413	1.2816	0.11475	0.361357	0.560288	0.539522	1.73813	0.453348	0.115371	0.415015	0.319077	0.394721
ENSG00000100997	ABHD12	6.08913	5.21702	3.38252	1.78226	3.15583	0.759822	1.26395	6.72147	3.18664	2.76939	2.2421	3.66449	1.11915	0.721829	9.97399	1.88148	1.34284	1.93228	0.64721	0.560068
ENSG00000131969	ABHD12B	0.170933	0.105705	0.161135	0	0.905684	0.029912	0	0.144363	0.04919	0.112848	0.094885	0.076477	0	0	0.136287	0.218667	0.031799	0.113729	0	0
ENSG00000139826	ABHD13	4.92336	7.94177	7.78376	6.61372	5.5632	3.70412	2.94065	4.48131	7.27342	7.82958	8.03896	6.89081	3.9512	3.04266	4.19005	4.0037	10.8323	6.35215	4.25217	2.16503
ENSG00000114779	ABHD14B	0.678748	0.422463	0.381068	0.203522	0.09803	0.226207	0.326922	0.386757	0.289052	0.362109	0	0.111512	0.363647	0.301551	0.515477	0.447022	0.034584	0.058669	0.282848	0.151483
ENSG00000168792	ABHD15	0.284119	0.446574	0.67293	0.329915	0.666825	1.25549	1.09716	0.147024	0.718165	0.688522	0.248841	0.648071	1.46521	0.952646	0.496816	0.336646	0.547559	0.761576	1.38702	0.903604
ENSG00000107362	ABHD17B	29.9676	24.1765	23.2283	19.1263	21.0066	4.39845	5.99104	29.3869	21.9263	29.1468	24.1735	21.3069	5.41041	5.44562	28.9325	16.9256	20.1167	22.6527	5.36985	4.90571
ENSG00000136379	ABHD17C	0.250265	0.314669	0.293115	0.277314	0.225802	0.297266	0.129156	0.268525	0.302631	0.308316	0.312801	0.236661	0.156986	0.141235	0.2829	0.221168	0.329102	0.271042	0.272826	0.095141
ENSG00000164074	ABHD18	2.09452	1.74716	1.66203	1.17648	0.826779	0.640828	0.451714	1.84471	1.45149	1.43251	0.998513	0.977735	0.639057	0.519551	3.82644	1.82342	0.908145	0.911511	0.545944	0.382435
ENSG00000140526	ABHD2	4.72002	1.94697	2.04391	2.69089	5.19372	4.97096	3.32093	3.72587	1.29487	2.94612	2.09958	3.2838	5.27674	3.07887	3.14713	0.887935	1.85111	2.76215	3.13287	2.82455
ENSG00000158201	ABHD3	2.22709	1.69673	2.91547	0.298692	1.07171	4.04381	2.00099	2.65151	2.92675	2.74874	0.455049	1.15756	1.09816	0.86754	2.21305	3.50648	0.451624	0.699896	1.08938	1.76371
ENSG00000100439	ABHD4	3.95634	1.22258	0.976162	0.518608	0.709002	1.81828	0.683694	2.88135	1.16059	0.740195	0.309308	0.269023	0.775722	0.854353	3.02598	1.18516	0.042428	0.487779	0.60045	0.441244
ENSG00000011198	ABHD5	1.81636	5.28934	1.29099	1.02324	4.3172	1.1735	0.252903	1.43632	1.12824	6.81088	1.5853	1.13357	0.537918	0.345025	8.87449	1.20002	0.862138	1.07872	0.438958	0.343134
ENSG00000163686	ABHD6	0.509731	0.604094	0.457318	0.401755	0.450241	0.691292	0.709733	0.580275	0.47313	0.831455	0.45772	0.72218	1.04828	0.731651	0.558487	0.787256	0.591234	0.618851	0.956908	0.616405
ENSG00000136754	ABI1	14.5599	12.7415	11.4105	12.2429	13.4592	5.83159	4.82608	14.9675	13.4128	13.1128	11.8645	15.8925	6.66725	4.87809	15.8372	9.26981	13.112	13.3245	5.89407	4.28112
ENSG00000138443	ABI2	39.7656	30.8156	33.1852	22.344	14.4582	5.0223	4.92359	12.7831	32.9462	35.2922	19.2028	8.57864	6.09823	4.16308	29.615	21.6588	7.62886	37.348	1.89459	3.0663
ENSG00000154175	ABI3BP	0.017535	0	0	0.000119	0.011574	1.57403	0.287228	0.009717	0.00938	0	0.03571	0.032994	0.966189	0.276831	0.00876	0	0.036264	0.021687	1.68275	0.23097
ENSG00000097007	ABL1	9.29457	1.36971	1.17445	0.778676	1.21192	0.774162	0.443251	8.212	1.04756	1.41349	0.539558	2.09159	0.48547	1.0725	2.07582	0.874997	0.400233	0.690031	0.466024	0.176167
ENSG00000143322	ABL2	2.74599	3.3743	2.58887	2.53512	2.93002	1.17505	0.768724	2.80731	2.52777	3.12127	2.91495	3.01595	0.832906	0.935919	2.72076	2.96774	3.0801	3.67202	1.42381	0.56321
ENSG00000099204	ABLIM1	5.71813	5.31003	3.94331	5.3675	4.5894	1.43376	1.60114	4.20889	5.01388	4.17277	5.344	4.5611	1.23571	1.66697	3.76802	3.93945	4.86688	6.11857	1.7897	1.26414
ENSG00000163995	ABLIM2	0.026219	0.148313	0.178295	0.232064	0.109496	0.027686	0.062716	0.013595	0.43332	0.140193	0.118571	0.097851	0.013699	0.046678	0.053065	0.044153	0.016911	0.179039	0.031076	0.014227
ENSG00000173210	ABLIM3	0.042715	0.013893	0.035271	0.211479	0.209499	0.055079	0.162335	0.059061	0.028791	0	0.146142	0.177663	0.148341	0.087634	0.041578	0.047954	0.180757	0.233029	0.156395	0.04827
ENSG00000159842	ABR	1.74909	3.02314	2.05139	1.82976	1.63056	1.46451	0.975121	6.02551	1.13609	1.43879	1.36666	1.80922	0.350253	0.842129	2.65893	2.80643	1.01413	0.993883	0.642734	0.324912
ENSG00000146386	ABRACL	103.34	58.0399	67.1319	48.4775	31.1486	5.1025	6.18474	96.009	56.0818	63.4905	38.7428	38.6486	9.37038	5.27757	96.7099	60.4119	43.3295	37.9527	6.7916	6.71134
ENSG00000163322	ABRAXAS1	11.3458	11.066	13.4106	2.23218	1.40444	0.950797	0.632002	6.31266	10.1237	14.6703	1.44887	1.89081	1.26012	1.27319	8.03276	3.78631	2.98225	3.85499	0.726945	1.02353
ENSG00000165660	ABRAXAS2	7.22138	8.36927	7.20215	6.66204	6.86708	3.06142	2.79522	7.60499	6.9866	8.21318	8.43925	7.63183	3.20859	2.99331	7.29783	6.73221	8.63027	8.36755	3.62145	3.59698
ENSG00000146109	ABT1	4.49993	6.405	7.76961	3.24398	2.99847	1.16744	1.06924	5.86454	7.36574	7.13998	4.29611	5.58094	1.52591	0.966006	5.27633	8.35802	4.01907	4.08261	1.27804	0.935532
ENSG00000166016	ABTB2	0.327082	0.16148	0.099444	0.675179	0.75637	0.325925	0.058468	0.361914	0.080968	0.118465	0.738922	0.85123	0.257892	0.090402	0.456936	0.067257	0.579119	0.877627	0.09783	0.20992
ENSG00000060971	ACAA1	0.603442	0.480124	0.396453	0.212433	0.88273	0.336518	0.407526	0.793913	0.653425	0.502866	0.127582	0.263793	0.404419	0.097122	0.927225	0.35958	0.227401	0.249669	0.193902	0.202362
ENSG00000167315	ACAA2	74.8361	48.5494	58.8605	18.8643	12.4947	11.0081	7.59202	98.479	60.8831	53.678	14.3138	20.1626	18.2176	6.47153	98.3345	45.0801	6.18513	19.1783	6.76604	13.5985
ENSG00000278540	ACACA	16.2674	20.1507	8.62308	19.9859	18.8875	4.77911	1.19688	9.99014	21.5637	17.3752	17.4693	22.5325	7.07181	3.27015	20.8197	12.5029	12.8384	21.0252	2.82955	3.34171
ENSG00000076555	ACACB	1.36797	0.113878	0.146605	0.098459	0.148613	0.415442	0.512244	1.336	1.13826	0.134601	0.026823	0.495716	1.0637	0.771339	0.872576	3.52986	0.057757	0.044462	0.241111	0.248464
ENSG00000111271	ACAD10	4.0983	1.80957	0.803872	0.479693	2.33461	0.71043	0.47307	3.56457	3.22718	1.90181	3.38492	0.813666	2.22801	1.70186	4.31376	2.43352	0.228747	1.1507	0.781587	0.210215
ENSG00000151498	ACAD8	11.6898	4.26276	3.06102	1.57701	2.16444	1.40151	0.751582	10.5864	3.46751	3.87299	1.78987	2.98237	1.61526	0.833631	8.09281	2.85292	1.55083	2.15427	0.697591	0.445773
ENSG00000177646	ACAD9	2.64775	5.00126	3.46214	1.8534	1.99719	1.50753	1.1831	4.05255	5.05717	4.09579	1.48774	1.83703	1.06112	0.982893	3.00108	4.3503	1.46931	1.46735	1.38281	0.568125
ENSG00000117054	ACADM	28.7477	47.9307	44.5403	26.1963	24.0959	11.7084	9.10952	27.8261	48.5493	49.163	26.5295	34.6882	8.35909	7.23771	30.1205	55.7331	30.6588	26.2819	12.9313	5.47003
ENSG00000196177	ACADSB	3.42677	2.39275	3.96479	5.04958	1.9728	1.22308	0.964746	7.03458	2.37987	2.60958	2.73682	3.04498	1.2304	0.981486	6.05572	2.78579	3.04432	2.89493	1.52436	0.773262
ENSG00000072778	ACADVL	8.95973	6.97803	6.84378	2.2023	5.2689	5.97285	10.7405	10.5307	8.0116	5.64786	2.0714	1.72358	6.13169	5.87138	8.63135	6.36892	0.422897	1.6638	3.96236	3.59473
ENSG00000157766	ACAN	0.141087	0.126373	0.078299	0.024023	0.011648	0.139026	0.116439	0.15638	0.09403	0.042352	0	0.029128	0.390092	0.047208	0.118884	0.031135	0.012141	0.010806	0.208618	0.116912
ENSG00000072818	ACAP1	0.650858	0	0	0	0	0	0	0.826904	0	0	0	0	0	0	1.17566	0.03537	0	0	0.01445	0
ENSG00000114331	ACAP2	17.2346	7.81177	6.69973	4.89117	5.17136	6.33622	4.99999	14.691	12.4624	11.0244	5.84697	8.43278	10.36	6.90351	11.5212	2.58405	7.27537	8.39989	6.23698	5.15017
ENSG00000131584	ACAP3	0.176997	0.245762	0.483573	0.713063	1.16406	0.011588	0.081527	0.571402	0.39197	0.184864	0.475742	0.168342	0.070281	0.048245	0.171653	0.128815	0.055643	0.137866	0.063619	0.020628
ENSG00000075239	ACAT1	28.7638	13.7401	18.0958	26.9753	14.4625	7.82835	4.66566	6.56405	17.0534	17.1028	11.4199	24.9463	9.63621	3.86151	30.1568	19.3162	29.6666	31.2511	4.4772	3.15846
ENSG00000120437	ACAT2	36.8691	64.576	66.8366	59.6189	59.2673	1.88173	2.37529	43.0026	77.2479	70.1701	71.2543	78.4352	2.27797	1.77652	45.9182	75.7023	60.6479	73.5067	2.56361	1.34915
ENSG00000182827	ACBD3	13.9995	13.2467	9.35386	12.6481	10.4876	8.82418	8.62483	14.6652	10.1089	11.5174	12.7936	13.6784	11.1838	8.1114	14.5696	7.98649	13.2151	12.5786	10.3767	7.99784
ENSG00000181513	ACBD4	0.508855	0.231884	0.067489	0.069397	0.087288	0.08602	0.100806	0.891685	0.220905	0.164052	0.069561	0.049083	0.140368	0.026088	0.742916	0.091758	0	0	0.064261	0.029871
ENSG00000107897	ACBD5	6.68123	8.54661	6.68479	13.5676	13.1807	3.27729	4.28943	6.38706	7.55549	7.19598	15.9172	18.8321	4.34917	5.38391	4.73472	7.85835	15.0231	19.0336	3.32268	3.47925
ENSG00000230124	ACBD6	18.1055	13.4609	12.6948	7.98787	7.57847	2.3422	0.818741	20.5769	13.711	13.7748	8.31643	9.16097	5.13453	3.36371	19.9874	14.0002	9.72352	9.00081	4.39645	4.01396
ENSG00000176244	ACBD7	6.90323	13.711	14.636	2.69616	1.60651	0.787623	1.12001	8.20121	18.4811	15.5177	1.1672	1.84315	1.33572	0.964901	10.662	13.1241	1.50505	1.63494	1.44012	1.33384
ENSG00000110455	ACCS	0.261592	0.091476	0.058059	0.059601	0.096299	0.21857	0.105332	0.323892	0.093064	0.137319	0.073834	0.18016	0.201902	0.136291	0.197562	0.078676	0.05787	0.143837	0.12945	0.070975
ENSG00000102977	ACD	1.11008	0.913842	0.314707	0.493108	1.01486	0.091769	0.234984	1.34987	1.74956	0.395982	0.121231	0.065392	0.163462	0	1.68791	0.790824	0.040765	0.073504	0.037082	0.035711
ENSG00000130234	ACE2	0.078348	0.099234	0.064588	0.099952	0.136502	1.84731	1.12854	0.054075	0.158168	0.120047	0.033285	0.054222	2.35422	1.191	0.076263	0.043689	0.06693	0	2.01223	2.02891
ENSG00000177076	ACER2	2.7866	3.54846	2.75115	3.16545	3.6717	0.544254	0.608561	3.12453	2.65249	3.46381	3.31074	3.52035	0.57044	0.91536	2.14343	3.69027	3.69557	3.89477	0.544272	0.561087
ENSG00000078124	ACER3	4.44155	4.52482	4.31314	2.30019	1.88472	1.5058	1.54757	3.83382	2.94745	4.5544	1.98305	2.33969	1.21931	1.32838	3.12104	2.13341	6.34903	4.47844	2.03422	1.15047
ENSG00000100813	ACIN1	25.1555	24.2316	25.2846	14.4427	15.3997	5.71287	3.10028	28.1365	30.9338	8.66697	7.90262	12.3809	6.87708	4.8035	33.9872	16.3305	2.87571	13.732	4.44333	1.47173
ENSG00000144476	ACKR3	0.340124	10.3872	8.57539	0.407347	2.7264	0.343803	0.243941	0.074258	7.80434	5.75763	0.347335	0.381746	0.342801	0.198209	0.093142	1.0391	0.290481	0.344	0.367183	0.144086
ENSG00000131473	ACLY	52.901	39.149	42.4291	45.6901	50.6625	5.28289	5.37172	61.5346	45.612	36.0015	41.8093	46.0015	7.89637	4.16438	59.6874	39.4236	36.9173	45.7261	4.96921	4.09176
ENSG00000122729	ACO1	9.65552	6.2216	5.37623	2.1602	1.86502	2.33492	2.29238	10.4105	5.94258	7.42194	1.61674	2.02944	3.04199	2.3771	11.0634	6.4367	2.06138	2.05982	3.1859	2.15745
ENSG00000100412	ACO2	8.62519	4.00416	4.74944	4.03364	5.48285	2.17665	2.21652	12.9801	5.15529	2.86399	2.39952	3.64356	1.64277	1.51569	8.76885	3.16716	1.59769	3.05425	1.22834	1.61464
ENSG00000112304	ACOT13	11.1981	6.52573	9.28219	5.34978	5.59633	3.79941	2.3824	10.2231	7.63085	5.39076	4.94737	5.06455	5.80594	6.89114	11.4186	5.54027	6.1448	4.11761	8.62178	2.67314
ENSG00000119673	ACOT2	1.15565	1.5212	1.1955	1.13989	1.64871	0.613235	0.273673	1.73566	3.21087	1.16034	0.659713	0.791111	0.369365	0.092403	2.07735	1.36601	0.83972	1.14623	0.374934	0.227966
ENSG00000177465	ACOT4	0.347988	0.38164	0.423015	0.11094	0.05326	0	0	0.582665	0.349661	0.149158	0.11065	0.044839	0.136081	0.076209	0.752591	0.659367	0.111805	0.149199	0.05111	0
ENSG00000097021	ACOT7	0.255855	0.171185	0.11983	0.214814	0.213929	0.028373	0.013403	0.281713	0.158579	0.096978	0.147274	0.133431	0.023451	0.029291	0.25333	0.099035	0.138133	0.18122	0.01315	0.012538
ENSG00000101473	ACOT8	0.973817	0.671435	0.183837	0.361801	0.396526	0.200252	0.429762	1.55311	0.450964	0.247524	0.337908	0.164081	0.260073	0.279744	0.980963	0.160792	0.357279	0.247014	0.210561	0.190662
ENSG00000123130	ACOT9	23.484	18.9097	12.7453	6.24802	10.2266	4.28231	4.05045	30.1051	24.0438	15.2771	9.28954	8.6503	7.67397	4.45099	36.1196	21.7341	8.44115	16.8591	7.25384	6.16016
ENSG00000161533	ACOX1	8.30244	4.06693	4.76833	6.24723	6.21099	4.00806	4.22487	10.9565	5.59198	5.40115	5.6472	6.75386	5.78096	4.16685	8.71665	3.17166	6.3461	7.56218	5.15046	3.60561
ENSG00000168306	ACOX2	0.133287	0.102245	0.06571	0.067904	0.032926	0.245681	0.513551	0.162033	0.05257	0.060763	0	0.054341	0.361988	0.232301	0.175599	0.133342	0.068093	0.030542	0.284051	0.432025
ENSG00000087008	ACOX3	0.920746	1.74154	1.88444	3.58483	1.04196	0.809632	0.538891	2.97762	1.47105	1.35441	1.02563	0.798402	0.532928	1.21732	1.3708	1.20513	0.875901	1.32844	0.488593	0.182113
ENSG00000153093	ACOXL	5.53653	0.004938	0.025773	0.002296	0.00883	0.02004	0.003424	1.07309	0.014486	0.005876	0.006902	0.003729	0.003747	0.003153	0.420115	0.035937	0.009206	0.0083	0.006377	0
ENSG00000143727	ACP1	59.7015	86.926	76.2173	44.069	46.3783	14.0245	20.7532	56.8255	86.2125	97.5988	43.7751	51.6226	21.7006	17.9968	63.7747	71.6983	40.6926	44.9268	16.422	17.821
ENSG00000134575	ACP2	2.93979	3.19114	5.06364	2.13366	3.44508	0.669583	0.730295	5.52531	3.83611	1.91798	1.71299	2.44618	0.870941	1.04951	3.81441	2.70207	1.06307	1.99955	0.164243	0.488272
ENSG00000102575	ACP5	0.922496	0.029721	0.116648	0	0	0.033149	0.453024	1.31947	0.178405	0.202103	0	0.032642	0.585954	0.459297	2.29574	0	0	0	0	0.035474
ENSG00000162836	ACP6	0.712327	3.22548	1.48284	0.202114	0.261672	0.568225	0.994811	1.05511	1.58113	0.865408	0.176388	0.397783	0.296798	1.02103	1.1153	0.915173	0.059573	1.13852	0.608184	0.430126
ENSG00000014257	ACPP	0.266715	0.605229	0.120952	0.125612	0.165613	0.234704	0.118307	1.04528	0.220548	0.363916	0.062955	0.025258	1.43466	0.191797	0.279007	0.362844	0.157925	0.169499	0.232346	0.246225
ENSG00000103740	ACSBG1	0.102268	0.010263	0.008699	0.022138	0	0.003247	0	0.086596	0.003568	0.004042	0.004528	0.007302	0	0	0.088426	0	0.00897	0	0	0
ENSG00000167107	ACSF2	2.39921	2.17447	2.6029	0.354944	0.446575	0.425715	1.15539	2.60288	1.9415	0.759342	0.046743	0.316492	0.66485	0.891051	2.2694	1.0124	0.030224	0.070691	0.567559	0.604199
ENSG00000176715	ACSF3	0.433974	0.185467	0.181233	0.071747	0.128101	0.221553	0.10937	0.312229	0.093938	0.198033	0.037158	0.088677	0.095314	0.078533	0.278888	0.037304	0.07089	0.126665	0.068998	0.132821
ENSG00000151726	ACSL1	1.51686	0.455618	0.227449	3.89024	2.90047	3.11552	2.57885	0.297902	1.61237	0.211613	3.23182	2.17597	2.2204	1.9968	0.840841	0.240768	7.20554	3.71676	2.42502	2.36774
ENSG00000123983	ACSL3	25.744	15.1692	5.42434	6.75604	22.0982	4.08085	2.90347	22.2825	4.57715	5.57782	6.95209	7.86309	5.54542	5.43819	27.7377	5.37954	7.47726	7.02345	7.01379	2.89287
ENSG00000068366	ACSL4	37.0796	51.8269	39.3171	26.1333	71.554	3.23018	2.65117	37.2429	47.8681	45.8754	153.023	114.624	4.97737	10.3096	33.342	22.0807	143.299	124.552	3.19252	2.4485
ENSG00000197142	ACSL5	0	0.012763	0.005455	0.005637	0.00544	0.663403	0.0931	0	0.004453	0.014981	0	0	0.119917	0.062144	0	0.014832	0	0	0.099017	0.079475
ENSG00000164398	ACSL6	0.108002	0.039094	0.044226	0.791791	0.384696	0.078399	0.038191	0.490435	0.022546	0.047029	0.615895	0.626913	0.093023	0.038826	0.033377	0.040795	0.598425	0.645164	0.233302	0.049499
ENSG00000005187	ACSM3	0.042691	0.985613	0.572658	1.64355	0.036446	0.170263	0.206434	1.51541	1.24097	1.45685	1.11519	0.893745	0.019811	0.011417	0.338029	1.37616	3.48062	0.552202	0.231143	0.008053
ENSG00000131069	ACSS2	3.55617	2.06577	1.84901	8.22566	3.8278	1.12405	0.812709	3.88138	5.16021	1.75201	9.95528	7.48401	0.472425	0.599864	3.55439	1.66822	2.96269	3.69302	0.997767	0.715686
ENSG00000111058	ACSS3	6.168	3.89125	2.68937	1.2788	0.982035	1.69973	0.710509	5.96725	3.77653	1.11946	1.07776	1.30029	2.67948	1.47208	5.11957	3.12284	1.73973	0.99543	3.14789	0.830599
ENSG00000107796	ACTA2	0.135186	1.82657	0.975425	0.044245	0.042694	20.7485	15.6003	0.249858	1.32116	0.949423	0	0.107831	56.3773	12.2256	0.302491	0.582117	0.088296	0.200002	25.1459	16.5947
ENSG00000075624	ACTB	771.242	31.3522	334.458	30.2863	30.5561	9.02028	8.52317	74.5175	37.0584	25.5733	23.8176	28.0186	11.0993	8.07708	826.792	23.4126	18.0547	27.7589	7.50344	6.32909
ENSG00000159251	ACTC1	1.48689	0.84432	0.847065	0.583357	0.630562	0.194286	0.106298	1.93869	0.789516	0.854267	0.441185	0.461487	0.158994	0.802438	1.99879	0.866145	0.606397	0.35849	0.210267	0.09974
ENSG00000184009	ACTG1	129.952	97.7102	75.9241	220.326	125.956	48.4897	61.1069	164.522	115.392	283.358	504.618	589.457	158.076	104.296	140.581	299.466	466.224	630.776	116.461	54.0735
ENSG00000163017	ACTG2	0.47492	0.052418	0.130097	0	0.098699	0.951073	0.564224	0.386763	0.021887	0.030611	0	0	2.04903	0.508357	0.489858	0	0	0.028762	0.765637	0.424329
ENSG00000136518	ACTL6A	38.398	42.5512	59.5309	18.0028	12.5883	6.65985	7.29518	46.7702	62.4082	62.2947	16.1322	16.357	9.4004	6.53027	43.7451	76.4674	18.9489	16.7027	8.37937	6.99056
ENSG00000077080	ACTL6B	0.209331	0.125637	0.106143	2.65724	3.68744	0	0.122942	0.13352	0	0	1.51283	1.77153	0	0.075348	0	0.071798	0.052247	0.942306	0.044468	0
ENSG00000072110	ACTN1	32.5672	6.08727	1.63552	1.50059	2.26893	2.66003	4.07771	31.0003	1.62466	1.68402	0.339169	0.79095	3.18811	2.35968	24.2161	1.25392	0.347483	0.475863	2.94519	2.49864
ENSG00000248746	ACTN3	1.02138	0.026689	0.033541	0	0.033446	0.072421	0.039765	1.55709	0.069342	0	0	0	0.085742	0.009692	0.888505	0.067372	0.017553	0.031336	0.080804	0.014915
ENSG00000130402	ACTN4	17.2584	6.20062	2.633	1.03652	2.82397	0.433921	1.75286	13.2305	4.93395	0.230417	0.119372	0.147623	0.287362	0.219803	17.2652	0.198736	0.071571	0.117268	0.948484	0.086325
ENSG00000131966	ACTR10	11.495	24.659	25.8271	37.7708	35.4046	5.46615	7.32678	15.7781	25.5091	25.6524	48.1304	44.0271	15.1618	9.62482	16.5636	31.7939	49.9986	49.7611	12.7944	10.5612
ENSG00000138107	ACTR1A	21.302	37.3773	18.4091	25.8939	41.2182	4.86068	6.77723	35.968	23.9562	26.2018	11.2877	18.621	7.79222	4.98236	35.4231	17.4256	8.66594	20.1191	5.03946	2.44987
ENSG00000115073	ACTR1B	4.73824	5.2772	5.0188	4.35249	6.00123	1.09078	1.63637	6.64874	7.57239	4.1105	2.89687	4.08297	1.92511	1.73475	6.11834	5.38173	2.64451	3.59618	0.581067	1.07058
ENSG00000138071	ACTR2	35.9673	44.5917	33.2247	41.296	41.5337	21.4726	3.78173	37.1145	9.25024	36.455	56.2822	66.5518	17.436	3.77752	33.8784	32.0642	42.6338	50.4595	6.62805	13.5263
ENSG00000115091	ACTR3	29.8924	39.5705	36.2667	24.0717	23.5548	9.99038	12.3082	27.8618	28.7419	35.1726	34.3743	28.7107	13.4585	11.2967	28.2474	25.954	36.8148	30.9221	6.68627	4.01333
ENSG00000133627	ACTR3B	4.45247	2.89171	4.52882	1.27448	1.0758	1.19306	0.471828	3.40301	2.88654	3.25639	1.49386	1.13679	0.519613	1.08743	3.14211	2.75265	0.957035	1.48311	0.591534	0.483585
ENSG00000101442	ACTR5	2.56199	2.58927	2.55953	1.20535	0.878149	0.236072	0.270372	2.4048	4.07283	2.51465	1.09892	1.35018	0.409543	0.450395	3.51424	4.20883	0.679719	1.6804	0.245679	0.271477
ENSG00000075089	ACTR6	12.2815	13.1366	15.0363	18.0992	12.5973	3.02683	5.36538	14.0659	11.3401	18.7301	19.7117	16.0733	6.56762	3.86316	14.4589	16.1225	24.4254	17.6624	1.41877	4.9218
ENSG00000113812	ACTR8	8.57379	11.6347	9.23262	14.9546	15.085	3.85536	3.75174	9.82816	12.5822	17.3155	14.1847	16.9043	4.91853	3.65261	7.73581	10.5492	18.0745	17.3174	4.92496	4.1675
ENSG00000184378	ACTRT3	1.79422	0.500649	0.962064	0.392083	0.372068	0.270894	0.443872	2.31209	0.670269	0.763957	0.458839	0.530335	0.360964	0.21797	2.48029	0.518417	0.594345	0.464983	0.543096	0.405281
ENSG00000115170	ACVR1	0.499666	0.406791	0.328063	0.319576	0.217178	0.464106	0.230731	0.460817	0.413767	0.39295	0.219703	0.26265	0.321728	0.272757	0.398637	0.3226	0.2226	0.218768	0.554757	0.141222
ENSG00000135503	ACVR1B	1.5712	5.14898	1.64861	5.25793	4.06693	0.808888	0.467968	1.92394	1.77078	1.56308	4.24614	4.40759	0.809056	0.593232	2.17244	1.45401	2.26657	5.40923	0.775138	0.362605
ENSG00000123612	ACVR1C	0.178449	0.108844	0.081635	0.504463	0.273491	1.71641	0.404404	0.260523	0.033935	0.051129	0.215168	0.279198	1.63102	0.429028	0.302872	0.037495	0.504536	0.241108	1.37172	0.340347
ENSG00000121989	ACVR2A	6.28839	12.2764	10.46	17.3713	15.0544	3.52941	2.8158	6.10511	11.1135	13.2007	22.1382	19.9357	4.45265	2.3423	6.83769	12.2897	22.9598	22.5197	4.87408	2.96362
ENSG00000114739	ACVR2B	21.8076	23.4763	17.4442	25.5351	26.2059	2.56156	2.51833	21.6134	23.5445	22.3211	30.3666	28.2706	2.13654	2.65094	20.7871	16.0921	29.5757	32.9775	3.36708	2.16188
ENSG00000229589	ACVR2B-AS1	1.08812	0.865138	0.997926	0.973756	0.600262	0.086316	0.039417	1.27233	0.99175	0.902868	0.576811	1.25054	0.128123	0.074719	1.05957	0.68759	0.889471	1.08029	0.240772	0.091456
ENSG00000119640	ACYP1	6.82985	9.72894	10.5526	10.0717	7.48347	5.07821	3.32959	5.74726	8.19851	6.61043	4.49023	9.04556	3.41728	3.46367	1.37639	5.36337	9.40846	5.4068	0.874982	0.28501
ENSG00000170634	ACYP2	1.21273	1.48057	3.06627	2.53668	0.042431	0.142194	0.054834	0.015082	0.715869	0.039921	0.045038	1.53441	0.055977	0.051192	0.417213	0.032521	0.058252	0.058885	0.116219	0.017346
ENSG00000196839	ADA	1.74296	0.983756	0.980678	0.309925	0.26201	0.455178	0.615488	1.26954	1.23164	0.572251	0.138833	0.108805	0.374675	0.178671	2.52145	0.906328	0	0.291763	0.212491	0.161426
ENSG00000093072	ADA2	10.3131	4.50409	3.66998	13.1211	14.2871	2.02433	2.0116	10.2666	4.40269	4.16619	9.67931	12.3722	1.20983	1.27531	8.67012	2.7651	7.76508	15.2479	1.22179	0.75369
ENSG00000168803	ADAL	2.75767	5.58621	6.81248	6.12517	5.31192	2.57119	2.20839	4.42734	5.15353	6.11245	6.72647	7.9202	2.07165	1.01235	3.75186	10.0787	7.9128	6.97272	3.65546	0.867558
ENSG00000137845	ADAM10	13.4818	9.3483	14.0018	7.08193	4.71826	10.3906	4.98665	15.4521	10.2572	11.3068	11.3507	10.4299	8.26003	3.90249	14.2176	7.45123	15.2597	9.34836	7.66171	4.57499
ENSG00000073670	ADAM11	0.221249	0.387395	0.197404	0.601043	0.832759	0.057387	0.096189	0.229227	0.201679	0.117498	0.365344	0.547745	0.064233	0.10738	0.096487	0.275246	0.150185	0.467068	0	0.069003
ENSG00000148848	ADAM12	0.249328	0.28735	0.769494	0.788899	1.54281	7.48564	4.61496	0.069615	0.505271	0.710287	1.38064	1.70517	7.436	4.24584	0.058447	0.32301	1.84918	1.55693	11.0257	5.1899
ENSG00000143537	ADAM15	2.00016	1.17114	1.06504	0.614962	0.323622	0.262313	0.516643	1.47014	1.38855	1.02835	0.099621	0.188848	0.501829	0.303524	1.18344	0.972166	0.025339	0.364622	0	0.305114
ENSG00000151694	ADAM17	12.502	18.7347	17.7535	7.66655	9.27116	3.42818	3.82889	13.0472	16.3944	21.4936	6.77613	10.7506	6.41698	5.10677	8.91124	12.1402	8.06931	8.66371	4.59276	3.82126
ENSG00000135074	ADAM19	1.4687	0.467601	0.487132	1.00469	0.993802	1.1803	0.709512	1.57169	0.348495	0.468961	0.668842	0.65274	1.08911	0.56628	1.61147	0.373525	0.455131	1.01137	0.977278	0.484978
ENSG00000008277	ADAM22	0.557542	0.534363	0.545859	1.27132	1.08463	0.178952	0.078956	0.496802	0.473271	0.539722	1.46233	1.14557	0.125219	0.084207	0.473775	0.516985	1.56378	1.35551	0.209855	0.084331
ENSG00000114948	ADAM23	4.53433	9.58672	5.79624	3.75535	3.59523	2.61387	2.29705	4.70345	7.60816	6.74546	3.37206	4.56933	2.80258	2.44621	4.07364	6.30131	3.44627	3.66839	2.57076	1.84916
ENSG00000042980	ADAM28	0.012304	0.061957	0.095386	0.024234	0.023148	0.122148	0.086843	0.020031	0.058589	0.079297	0.008261	0.040171	0.085268	0.298162	0.031274	0.031778	0.016611	0.011176	0.076315	0.087024
ENSG00000168594	ADAM29	0	0	0.00441	0.040605	0.037205	0.013123	0	0.002145	0.001819	0.00206	0.011352	0.031958	0	0	0	0.006056	0.018697	0.03852	0.008591	0
ENSG00000197140	ADAM32	0.027787	0.084317	0.170893	0.102019	0.148388	0.125469	0.120032	0.010641	0.078789	0.149959	0.118099	0.084198	0.100141	0.103491	0.012559	0.074427	0.172209	0.124446	0.161966	0.127153
ENSG00000168615	ADAM9	7.26518	10.9898	7.16314	5.06088	7.16326	18.5346	20.0456	5.31429	7.7134	7.50735	5.92899	5.57631	15.1694	20.2727	8.44344	10.7299	6.42072	8.18296	21.3209	13.1547
ENSG00000154734	ADAMTS1	0.78684	5.11369	2.89195	0.730718	1.56779	12.0494	9.46601	1.67671	5.03575	2.24883	0.701434	1.33131	10.845	13.0367	1.09657	1.64694	1.2052	1.10954	16.7071	10.8072
ENSG00000142303	ADAMTS10	0.638178	0.279182	0.089369	0.157733	0.545656	0.165771	0.154157	0.495401	0.127664	0.082641	0.344168	0.132409	0.122239	0.075218	0.324608	0.239705	0.092843	0.181247	0.064986	0.101717
ENSG00000151388	ADAMTS12	1.40116	1.09188	1.02952	0.360203	0.45453	2.22657	3.53422	1.46694	2.43049	3.19115	0.541388	0.503549	2.22129	3.69529	3.03654	1.02347	0.411508	0.698983	2.16704	1.43636
ENSG00000166106	ADAMTS15	0.2334	0.603185	0.464331	0.067104	0.244593	1.05136	0.450719	0.18758	0.4186	0.373646	0.13775	0.093717	1.08852	0.706118	0.191539	0.79155	0.045394	0.188231	0.531788	0.528519
ENSG00000145536	ADAMTS16	0.986209	0.204434	0.2992	0.654403	0.644557	0.900343	0.353346	1.22034	0.138934	0.378848	0.649489	0.587889	0.971279	0.282886	1.26096	0.383535	0.339276	0.484677	0.583739	0.237734
ENSG00000140470	ADAMTS17	0.021164	0.008722	0.007188	0.008143	0.029622	0.086959	0.024322	0.018743	0.014219	0.006958	0.007736	0.020471	0.031913	0.010696	0.0222	0.023406	0.007856	0.018002	0.069502	0.003424
ENSG00000140873	ADAMTS18	0.013933	0.741895	0.198749	0.040301	0.045411	0.152321	0.03142	0.015918	0.467234	1.53973	0.035774	0.046828	0.231567	0.023068	0.012079	3.23909	0.0599	0.219914	0.119273	0.024549
ENSG00000145808	ADAMTS19	3.20242	3.13659	3.85904	0.869239	1.73273	0.304115	0.186845	2.8876	3.00944	4.63719	0.560698	0.798322	0.270612	0.240182	4.67085	2.69961	0.989423	0.773827	0.355841	0.233759
ENSG00000087116	ADAMTS2	0.29659	0.087902	0.039543	0	0.026287	1.51522	0.765624	0.290741	0.096833	0.060943	0.013517	0	1.42037	0.733525	0.428239	0.089603	0.054908	0.022922	1.40365	0.60543
ENSG00000173157	ADAMTS20	0.786294	0.712393	0.669569	0.089462	0.104418	0.144809	0.08031	1.09252	0.621075	0.89499	0.159074	0.172936	0.121665	0.069669	0.979411	0.448084	0.162911	0.106237	0.136429	0.063863
ENSG00000156140	ADAMTS3	0.108687	0.090386	0.134912	0.036927	0.038272	0.137356	0.07295	0.079253	0.095996	0.12548	0.031347	0.053714	0.086619	0.084018	0.091912	0.115692	0.046678	0.065398	0.101902	0.076623
ENSG00000158859	ADAMTS4	1.13535	0.26419	0.232316	0.038226	0.098118	0.179845	0.216805	1.66962	0.161037	0.512217	0	0.010352	0.458402	0.13961	1.13464	0.228885	0.012842	0.046077	0.139833	0.112157
ENSG00000154736	ADAMTS5	0.124054	0.351956	0.364846	1.34357	1.05616	2.04323	1.02482	0.082459	0.206165	0.285335	1.69264	1.30503	1.36107	1.08265	0.164324	0.226336	2.04332	1.1945	2.05851	1.17156
ENSG00000049192	ADAMTS6	0.271346	4.44553	2.09333	0.30839	0.491343	0.358315	0.153173	0.264673	3.84967	8.7127	0.682936	3.96567	1.19881	1.58096	0.271316	3.11572	0.598741	1.6589	0.217988	0.332297
ENSG00000136378	ADAMTS7	0.475661	0.572788	0.460562	0.339668	0.67343	0.075899	0.099056	0.485888	0.365782	0.271199	0.175899	0.136462	0.053422	0.068701	0.368352	0.281618	0.0515	0.209042	0.061532	0.030077
ENSG00000134917	ADAMTS8	0.341158	0.06658	0.056343	0.028823	0	0	0	0.394886	0.045764	0.078151	0	0	0	0	0.4088	0.113768	0	0	0.026957	0
ENSG00000163638	ADAMTS9	0.28448	6.05914	5.44724	2.66966	4.50346	7.1931	6.16391	0.166839	4.89127	6.08894	1.82425	2.17356	5.43042	7.86425	0.232539	6.41851	3.10998	2.98674	6.39012	4.25593
ENSG00000241684	ADAMTS9-AS2	0.010421	0.116399	0.052682	0	0.068507	0.269924	0.238513	0	0.043146	0.157599	0.018069	0.060481	0.131274	0.244197	0.039345	0.1174	0.018349	0.016297	0.306144	0.098514
ENSG00000178031	ADAMTSL1	0.011082	0.038041	0.01871	0.077904	0.051328	0.241381	0.114724	0.015118	0.060469	0.043141	0.105057	0.059445	0.174851	0.109222	0.006485	0.021514	0.042914	0.052592	0.230722	0.091288
ENSG00000156218	ADAMTSL3	0.011661	0.025011	0	0.062156	0.042781	0.263098	0.111884	0.040564	0.008101	0.021344	0.005955	0.065429	0.189052	0.078431	0.00908	0.01567	0.04462	0.040162	0.264849	0.107245
ENSG00000160710	ADAR	64.5378	25.6905	22.4983	25.0066	25.8688	4.04547	2.86699	68.0151	25.793	22.3784	7.2024	7.35188	4.02301	9.70171	59.2292	8.09919	6.00431	24.389	3.81733	2.47022
ENSG00000197381	ADARB1	1.23559	0.098258	0.13345	0.057682	0.070161	0.223653	0.102543	0.496912	2.35533	0.133535	0.060158	0.060288	0.099526	0.095976	0.790237	1.47594	0.081803	0.273014	0.22492	0.052233
ENSG00000185736	ADARB2	0.022268	0.054548	0.069012	0.196312	0.165996	0.131974	0.025324	0.029154	0.040902	0.075133	0.059878	0.10574	0.077999	0.060166	0.022533	0.055157	0.198439	0.102482	0.11954	0.041206
ENSG00000065457	ADAT1	2.34018	4.1734	6.6094	4.17291	8.20461	1.34157	0.524837	2.1647	3.23274	3.18578	3.83245	3.22045	1.68247	1.09112	2.47097	3.80998	3.01663	3.56035	0.849104	0.485058
ENSG00000189007	ADAT2	1.87747	2.50328	0.985698	0.546473	0.512246	0.465154	0.340513	3.39151	2.7793	1.12813	0.564347	0.512787	0.411205	0.278387	2.65242	1.29757	0.619366	0.647375	0.555671	0.262232
ENSG00000063761	ADCK1	0.43012	0.568807	0.100129	0.086056	0.044537	0.149791	0.046304	0.48753	0.181901	0.097401	0.026058	0.029475	0.058355	0.073671	0.280252	0.102203	0.031305	0.037521	0.121947	0.073327
ENSG00000133597	ADCK2	1.38403	3.55667	3.22348	2.15846	2.89551	1.25381	0.436354	2.62747	4.14578	4.28458	0.679184	1.89939	0.441729	0.990126	2.92578	3.79046	1.149	3.00794	0.371324	0.077838
ENSG00000164742	ADCY1	2.18876	1.2744	0.82939	3.87205	3.08076	1.16321	0.411543	2.7278	1.07496	0.820666	3.21498	3.09737	1.07073	0.358618	3.44883	0.88956	2.50554	3.59083	1.16769	0.418025
ENSG00000161912	ADCY10P1	0.370462	0.140978	0.138176	0.072131	0.115946	0.225125	0.121037	0.468553	0.160756	0.309884	0.159175	0.179977	0.091634	0.151808	0.279306	0.268481	0.145943	0.218756	0.206854	0.048411
ENSG00000078295	ADCY2	2.72073	0.061918	0.075512	1.29634	0.404302	0.716478	0.15794	3.24405	0.088312	0.07946	0.542423	0.372156	0.198999	0.178981	1.32701	0.064777	0.446188	0.79864	0.2033	0.092559
ENSG00000138031	ADCY3	2.27595	2.0512	1.48442	0.365197	0.353437	0.549129	0.573947	2.0019	1.53154	0.98856	0.214633	0.176048	0.818615	0.405793	2.26932	1.09969	0.087619	0.244655	0.23953	1.15783
ENSG00000173175	ADCY5	0.054842	0.027471	0.01018	0.018669	0.135351	0.100593	0.039492	0.052568	0.012361	0.007014	0.028292	0.016753	0.034329	0.035969	0.023523	0.024047	0.01047	0.02813	0.055936	0.008045
ENSG00000174233	ADCY6	1.94238	2.4363	1.47772	1.10853	1.81309	1.56918	0.989814	2.07553	1.64123	1.2588	0.648715	1.13994	1.55226	0.698735	1.68363	1.44689	0.446528	0.973846	0.464864	0.339204
ENSG00000121281	ADCY7	0.093056	0.09223	0.081105	0.047547	0.071946	0.07638	0.056179	0.164261	0.052665	0.067389	0.084763	0.081763	0.096808	0.0336	0.094233	0.115141	0.075318	0.091828	0.089853	0.035325
ENSG00000155897	ADCY8	0.084065	0.050352	0.020318	0.264851	0.468295	0.02093	0.064597	0.017896	0.034724	0.039434	0.197081	0.373727	0.053921	0.060695	0.050228	0	0.17809	0.377847	0.120904	0.039003
ENSG00000162104	ADCY9	0.138172	0.201953	0.100206	0.135424	0.149984	0.187999	0.059732	0.154842	0.118481	0.083647	0.169464	0.197277	0.100604	0.09226	0.132692	0.06594	0.044596	0.421905	0.147476	0.046329
ENSG00000141433	ADCYAP1	0.026768	1.06856	0.894536	4.9722	7.92723	0.940702	0.595834	0.027759	0.943465	1.25612	4.47018	7.99227	1.09396	0.474961	0	0.545897	5.60104	8.56476	1.15233	0.517258
ENSG00000078549	ADCYAP1R1	2.28316	1.01578	0.834341	0.42646	0.676996	0.238462	0.09164	4.25777	1.09786	1.25768	0.367601	0.361443	0.074704	0.154271	2.03287	1.13875	0.231617	0.41364	0.092863	0.017903
ENSG00000087274	ADD1	4.15573	19.0504	11.6408	13.9292	4.84683	5.48944	4.73214	8.86252	18.6709	12.0773	16.7436	15.6207	10.2153	4.59879	10.3807	22.6697	5.22284	17.2666	3.14619	2.8878
ENSG00000075340	ADD2	3.4066	4.83903	0.830472	1.7526	1.94575	0.116995	0.085143	15.2823	1.36323	0.77878	2.47851	2.11839	0.089278	0.100827	16.0524	0.862809	1.62298	2.49046	0.108398	0.065561
ENSG00000148700	ADD3	33.1368	18.0907	4.24505	5.41911	14.9961	36.3954	21.0546	14.818	18.1671	26.8381	2.99398	3.79086	31.4733	16.6919	26.842	5.50085	10.6708	4.12281	28.9876	18.6139
ENSG00000118492	ADGB	0.005363	0.010465	0.013153	0.240908	0.006623	0.528886	0.10016	0	0	0	0.020573	0.011152	0.088217	2.01144	0	0	0.020273	0.121541	0.131465	0.332931
ENSG00000020181	ADGRA2	0.024647	0.095757	0.103262	0.095767	0.067634	0.762895	0.368795	0.013105	0.094791	0.062624	0.04864	0.081355	0.601145	0.314334	0.024601	0.127472	0.059608	0.048453	0.486406	0.215424
ENSG00000152990	ADGRA3	17.3061	22.7265	19.4095	8.52613	10.3355	3.66561	3.26488	13.2446	26.6067	11.8862	4.47391	10.8978	2.90219	3.15073	17.7208	18.3959	4.6461	13.4639	6.02932	1.70617
ENSG00000121753	ADGRB2	0.288915	0.468108	0.082139	0	0.059267	0.078387	0.129117	0.30772	0.120125	0.060237	0.012312	0.020158	0.291519	0.293224	0.331906	0.02489	0	0.00955	0.044703	0.021473
ENSG00000135298	ADGRB3	0.102531	1.42892	0.545142	5.45268	3.81269	0.965888	0.976145	0.104258	1.10335	0.666381	6.09465	4.41978	1.46346	1.26759	0.232109	0.648373	6.60918	6.99322	0.723647	0.45144
ENSG00000069122	ADGRF5	0.01296	0.036421	0.016052	0	0	0.288488	0.214297	0	0.013103	0	0	0	0.380954	0.31485	0	0.042778	0.016886	0	0.384945	0.297886
ENSG00000205336	ADGRG1	0.039368	0.165162	0.830005	1.36617	2.46588	0.045251	0.041972	0.032937	0.137171	0.051875	0.170005	1.699	0.043353	0.035407	0.022749	0.093041	0.146358	1.65614	0.024088	0.020898
ENSG00000173698	ADGRG2	6.83536	0.394152	0.315268	1.04963	0.969113	0.332986	0.229638	3.67323	0.295097	0.529015	0.861664	0.909375	0.221457	0.308306	3.90213	0.255553	1.00347	1.36263	0.287093	0.231214
ENSG00000156920	ADGRG4	0	0	0	0.010384	0.019939	0.145966	0.015647	0	0	0.018123	0.05204	0.084353	0.093163	0.048305	0	0	0.05139	0	0.227811	0.02741
ENSG00000159618	ADGRG5	0.597937	0.016983	0.021558	0.04255	0.021497	0.029958	0	0.452846	0	0	0	0.018098	0.033464	0.014232	0.236674	0	0	0.02014	0.022486	0
ENSG00000112414	ADGRG6	0.687921	3.53917	2.10035	1.58195	1.49014	3.15567	1.51366	0.756239	6.53213	4.29276	0.809254	1.45927	3.1294	1.36075	0.644842	3.61609	1.18473	1.90874	5.81349	2.10895
ENSG00000144820	ADGRG7	0	0	0	0.224984	0.099016	0.349134	0.266044	0	0	0	0.215613	0.260436	0.6982	0.275835	0	0	0.193658	0.058197	0.352044	0.389325
ENSG00000072071	ADGRL1	7.80911	0.724991	0.5054	0.802463	2.85032	0.57175	0.695013	6.44189	0.821463	0.625014	0.772924	0.618081	0.341603	0.292714	6.18794	0.360345	0.514425	1.15312	0.514147	0.163689
ENSG00000117114	ADGRL2	13.6881	30.9127	22.868	7.85471	7.51079	3.02398	2.62616	29.9809	30.7946	23.0455	14.6721	23.293	2.70722	4.26117	25.5436	22.8679	14.2372	17.8558	3.85999	1.78525
ENSG00000150471	ADGRL3	0.533219	12.4675	10.1135	39.4538	54.3025	5.26565	2.89471	0.764459	12.1629	12.0339	70.717	39.9018	0.895881	6.16807	3.66667	10.9921	24.4739	56.0947	3.2732	7.32139
ENSG00000162618	ADGRL4	0.725733	0.107846	0.273448	0.669752	0.446818	0.145082	0.053964	0.552095	0.195486	0.063453	0.501815	0.347652	0.257901	0.073797	0.540335	0.235569	0.571705	0.354196	0.263966	0.156196
ENSG00000164199	ADGRV1	14.7837	10.8915	5.28157	0.549146	0.713091	4.86378	2.44757	13.3805	10.4909	16.1567	0.250516	1.63958	1.23143	6.85887	13.6299	6.23414	1.51843	1.29157	0.828212	2.10665
ENSG00000196616	ADH1B	0.009451	0.012726	0	0.06538	0.032334	0.156339	0.14072	0	0.009078	0.006062	0.018309	0.016526	0.174755	0.134218	0	0.014324	0.044914	0.007765	0.159822	0.09201
ENSG00000248144	ADH1C	0	0.485175	0.064435	0.140884	0.4775	0.288254	0.051228	0	0.334962	0.345587	0.83676	0.659651	0.202277	0.24074	0	0.278495	0.458435	0.255369	0.196659	0
ENSG00000197894	ADH5	87.2315	84.9153	101.762	32.8787	61.6345	15.3634	23.6747	140.304	101.273	88.5323	33.2642	85.0761	29.4797	23.3485	112.935	112.966	36.0447	72.7652	14.7891	12.9002
ENSG00000196344	ADH7	0	0	0	0	0	0.101516	0.427543	0	0	0	0	0	0.876752	0.245251	0	0	0	0	0.038234	0.072545
ENSG00000182551	ADI1	11.3074	9.77028	3.48383	2.59895	2.78186	0.96469	0.975558	5.16911	5.87538	3.93158	1.78425	4.93224	1.34934	0.893941	12.1462	7.05276	2.32854	2.03249	1.1373	0.814997
ENSG00000159346	ADIPOR1	27.6314	14.183	13.8809	10.7754	10.9165	6.35483	8.32638	23.3428	15.2644	16.1164	11.7673	12.2632	10.5972	7.51558	22.4327	16.345	9.95449	11.7378	7.02779	6.05919
ENSG00000006831	ADIPOR2	4.97208	6.55083	12.6741	7.21254	1.62348	4.02761	0.849788	2.22121	10.1168	2.33334	8.56747	1.55259	1.2267	1.16541	1.93734	11.375	7.37248	8.66219	1.57973	1.25828
ENSG00000156110	ADK	9.65729	12.8421	11.8968	0.459504	6.64786	0.307246	2.15048	11.8237	18.4817	15.71	0.705148	1.6263	0.363037	2.26475	10.3241	11.0531	7.12185	0.68488	0.35024	0.210706
ENSG00000148926	ADM	6.23042	0.831233	0.763148	0.397574	0.119271	3.62496	2.18898	5.90874	0.600885	0.649367	0.40627	0.265588	6.13254	1.34556	6.72826	0.675602	0.387539	0.271338	2.25283	2.58287
ENSG00000101126	ADNP	15.9506	5.28666	10.6189	12.4633	9.55577	8.64082	2.50786	11.0334	7.51013	14.9342	17.9725	17.6789	4.84965	3.76171	10.8569	7.17481	12.2476	12.911	8.42363	3.63386
ENSG00000101544	ADNP2	18.2698	20.8587	16.6968	7.43743	7.61423	0.978179	0.737917	17.2349	15.1289	13.0918	3.161	7.74644	1.1647	1.83565	20.4309	5.66192	3.33595	3.70306	1.35045	0.681901
ENSG00000259456	ADNP-AS1	0.537278	0.324855	1.22618	1.04211	1.56877	0.117183	0	0.374861	0.585442	0.397673	1.0474	0.576956	0	0	0.409617	0.186881	1.28692	0.475517	0.131531	0.125403
ENSG00000181915	ADO	13.3977	15.9218	16.0094	13.744	10.7303	3.03296	3.31929	13.9868	15.972	17.78	15.8655	15.5032	3.66656	2.89011	13.6626	11.398	17.9339	14.4434	4.08064	3.53257
ENSG00000170425	ADORA2B	0.987557	0.161138	0.406392	0.06953	0.059714	0.855836	0.812478	0.888914	0.166416	0.251362	0	0.282988	1.02493	0.866895	0.693731	0	0.070773	0.191723	1.30057	0.920165
ENSG00000159322	ADPGK	6.9738	6.52895	8.90195	3.53487	4.72733	2.79088	2.87974	5.89182	15.4622	13.6444	4.76497	3.65663	3.88827	2.67751	5.37089	7.94842	4.85495	2.96547	5.75803	1.63357
ENSG00000144843	ADPRH	0.882791	0.75934	0.656617	0.447466	0.190812	0.225127	0.107276	1.02921	0.718642	0.480287	0.170179	0.388523	0.208712	0.148645	0.923108	0.447112	0.307182	0.283993	0.2111	0.125447
ENSG00000153531	ADPRHL1	0.056409	0.215076	0.06652	0.428081	0.366667	0.019888	0	0.026783	0.152246	0.053929	0.295831	0.263511	0.008574	0.008198	0.018332	0.094994	0.119671	0.235961	0	0
ENSG00000116863	ADPRHL2	3.89059	3.82053	3.72041	1.25289	2.03105	0.583547	0.994668	4.24799	6.52639	3.31408	0.868835	0.946701	0.772075	0.378516	5.00764	1.64325	0.154385	1.12068	0.352466	0.267733
ENSG00000170222	ADPRM	3.07089	4.43618	4.70216	3.37753	4.21744	0.871712	1.08902	2.99667	4.78984	4.65088	4.8012	5.68572	2.73188	1.13492	3.38867	3.81479	5.26849	5.70698	1.34731	1.70159
ENSG00000120907	ADRA1A	0.019462	0.002558	0.003695	0.214306	0.268884	0.857777	0.120563	0.017464	0.002116	0.001199	0.971378	0.481375	0.501794	0.413893	0.023014	0	0.219242	0.484639	0.516691	0.618957
ENSG00000150594	ADRA2A	3.86412	0.187361	0.170117	1.4694	1.23785	3.69242	2.24001	4.71082	0.13584	0.062925	1.8267	1.10716	4.36042	2.32007	3.54397	0.138776	1.23912	1.23087	4.72926	3.51654
ENSG00000274286	ADRA2B	0.273438	0.059555	0.037424	0.078121	0.150766	0.032224	0	0.863211	0.123417	0	0	0	0.031888	0.051539	0.679085	0	0.039364	0	0.07234	0.034484
ENSG00000184160	ADRA2C	0.863039	0.125108	0.059849	0.061847	0.110497	0	0.046139	0.63651	0.048854	0	0	0	0	0.042485	0.647754	0.08137	0	0.055914	0	0
ENSG00000130706	ADRM1	5.78578	2.34824	1.93593	0.415697	1.67528	0.40571	0.364121	6.81039	2.61339	1.07564	0.061617	0.390606	0.100369	0.248347	4.39043	1.32846	0.060724	0.27072	0	0.053733
ENSG00000239900	ADSL	21.0438	31.5949	21.0796	6.66018	5.45901	2.726	2.01568	50.6093	20.7515	15.6063	5.74266	6.54308	3.6061	2.11168	38.5822	21.7576	2.48693	6.9036	1.39856	1.97156
ENSG00000035687	ADSS	40.1885	35.922	30.2872	17.4412	17.4209	4.5214	6.05603	37.2682	38.2938	40.9641	20.0582	25.6386	6.04847	4.24365	37.4829	28.3133	30.0043	19.5661	5.93877	3.94893
ENSG00000185100	ADSSL1	1.69598	0.23548	0.165491	1.84444	0.600832	0.603678	0.227022	2.84709	0.117958	0.335139	0.350589	0.272558	0.060754	0.370901	1.08067	0.130819	0.046936	0.044779	0.201779	0.065539
ENSG00000106624	AEBP1	1.0007	0.936421	0.612675	0.14995	0.188939	0.489101	1.13559	1.04678	0.663693	0.295197	0	0.097854	0.462956	0.673114	1.51382	0.325437	0.024978	0.04235	0.159508	0.132384
ENSG00000139154	AEBP2	14.6117	6.01618	3.06379	2.14067	2.19165	4.62053	3.42935	13.1505	3.48969	2.2708	0.130484	3.62143	2.98038	0.844239	7.78301	4.25614	1.14602	2.46544	0.3658	1.91508
ENSG00000181026	AEN	14.6553	9.93207	7.80063	0.816704	1.06519	0.683065	1.37881	14.2738	9.13008	8.36393	0.696384	0.949622	1.36797	1.01966	16.1991	10.0206	0.74862	1.02175	0.925974	0.644912
ENSG00000104964	AES	17.1302	8.13673	8.41115	18.5512	15.3676	2.47869	4.06123	21.2902	6.59164	3.0062	5.2259	7.53049	2.81489	2.22933	16.4482	3.25158	5.55766	14.6881	2.5007	1.32758
ENSG00000196526	AFAP1	0.914113	1.79375	1.55976	7.71939	6.12495	1.54781	0.931874	1.40296	1.83987	1.52617	6.17672	3.18314	1.16319	1.76122	1.19927	3.03795	4.13325	6.2489	1.06824	1.64053
ENSG00000157510	AFAP1L1	0.391788	0.161678	0.242907	0.222299	0.241155	0.183622	0.165832	0.597275	0.198063	0.173716	0.084147	0.270324	0.227697	0.111351	0.71254	0.146053	0.198705	0.401944	0.129135	0.14701
ENSG00000169129	AFAP1L2	0.263911	0.412893	0.352167	0.491165	0.299669	0.917239	0.575907	0.25434	0.337455	0.343187	0.427994	0.662637	0.735772	0.616785	0.293882	0.358808	0.840874	0.714828	0.772836	0.721322
ENSG00000130396	AFDN	53.0523	24.9029	15.7037	21.7631	20.5681	11.39	7.12649	57.5365	17.2549	21.263	26.067	30.3026	8.15272	9.47062	32.5281	19.4949	18.4578	32.972	14.6019	2.97787
ENSG00000198221	AFDN-DT	0.952775	0.79358	0.737323	0.988299	1.06913	0.083176	0.113574	0.399115	1.54266	0.76418	1.23671	1.59058	0.081495	0.172459	0.569298	1.77863	1.5974	0.961579	0.138655	0.044065
ENSG00000172493	AFF1	12.3276	1.33418	5.51127	0.599467	0.85714	1.40074	0.4229	2.52374	4.52091	2.86891	0.449554	0.430538	0.25832	0.456034	9.85849	6.71974	0.27214	0.922214	0.466049	0.558903
ENSG00000155966	AFF2	0.26592	0.281059	0.347465	0.545758	0.571203	0.285308	0.184936	0.283428	0.26144	0.338729	0.538602	0.729859	0.207483	0.209135	0.234019	0.290695	0.635193	0.843996	0.290401	0.194868
ENSG00000144218	AFF3	0.143929	0.707237	0.538364	0.435043	0.398131	2.06747	0.062274	0.011711	0.464944	2.82615	0.401565	1.39443	2.58265	0.08062	0.154866	7.39822	0.486351	0.547465	0.198956	0.06294
ENSG00000072364	AFF4	16.8901	19.5837	18.3959	27.8388	21.108	16.5978	7.46303	16.9274	12.4154	15.1026	29.5862	29.3307	10.9323	11.0174	14.0894	13.0281	22.8436	26.131	15.1068	8.34517
ENSG00000135537	AFG1L	1.74702	0.279363	0.230579	0.176729	0.237013	0.160854	0.113852	0.242155	0.659747	0.275576	0.339042	0.271058	0.099496	0.09994	0.235046	0.274426	0.314194	0.244803	0.143486	0.076266
ENSG00000223959	AFG3L1P	0.399792	1.12885	0.522737	0.278225	0.439214	0.249353	0.148655	0.536122	0.381719	0.460246	0.16206	0.424811	0.109762	0.109445	0.288821	0.590667	0.288464	0.22155	0.099198	0.035518
ENSG00000141385	AFG3L2	26.653	11.9815	9.43284	6.05412	6.13946	3.43183	3.11227	34.6184	22.3214	20.014	6.96092	14.177	7.51172	2.7815	27.9406	9.48468	7.30996	12.7434	3.39216	2.72359
ENSG00000183077	AFMID	6.05382	2.25009	0.529186	0.148791	0.219404	0.367987	0.193645	8.42634	1.52269	1.48	0.127191	0.207474	0.287638	0.200658	7.57793	0.556771	0.065238	0.117047	0.025945	0.113732
ENSG00000081051	AFP	0.755331	0.715805	2.64898	20.0483	18.5476	7.39537	1.42678	0.286849	0.568165	2.62299	10.0971	23.3712	9.86316	0.859134	2.35791	1.76975	22.7351	21.5036	7.58391	0.783754
ENSG00000119844	AFTPH	7.08093	11.0663	8.25194	21.4913	18.545	2.60052	2.86327	6.20991	14.1115	13.0654	31.4442	29.1376	3.00839	3.06846	5.54	9.15626	35.1309	27.7835	3.26987	4.2092
ENSG00000038002	AGA	3.11474	7.03544	7.59941	2.39392	2.35846	1.00155	1.22625	3.18307	6.80938	9.18874	3.65279	4.54238	1.77634	0.830604	3.64924	5.2627	2.79224	2.47423	1.09123	1.21293
ENSG00000157985	AGAP1	1.72919	0.215821	0.739709	0.476586	0.297758	0.28194	0.109624	0.212036	0.78197	0.163649	0.255199	0.234377	0.101528	0.130683	1.792	0.128544	0.219942	0.41676	0.229983	0.056791
ENSG00000135439	AGAP2	0.21633	0.01492	0	0.544885	0.597962	0.048277	0.102347	0.108479	0.045919	0.035026	0.347769	0.234548	0.147593	0.053776	0.086794	0	0.176924	0.458888	0.026018	0.014712
ENSG00000133612	AGAP3	0.66347	1.26136	0.829556	0.505891	1.98232	0.355577	0.27009	1.01987	1.31949	0.74295	0.639029	0.301934	0.706853	0.297944	1.15965	0.889784	0.408472	0.700577	0.334923	0.04155
ENSG00000188234	AGAP4	0.880137	1.78857	0.814232	1.05603	0.923143	0.450456	0.642355	1.23386	1.258	1.44152	0.778524	0.898321	0.5314	0.686401	0.999165	1.20767	1.28604	0.854812	0.342939	0.49099
ENSG00000204149	AGAP6	1.00591	1.13268	1.39943	0.84101	0.732237	0.545113	0.364302	0.994803	1.38251	1.31783	1.17523	0.579547	0.64125	0.853828	0.66036	0.627876	0.986464	0.996166	0.866051	0.308473
ENSG00000273540	AGBL1	0	0.01149	0	0.19373	0.13789	0.122522	0.029223	0	0.007659	0	0.185721	0.1807	0.023747	0.044052	0	0.009725	0.175406	0.275128	0.119033	0.017121
ENSG00000165923	AGBL2	0.168726	0.187387	0.479924	0.178156	0.066706	0.329207	0.444666	0.189256	0.232943	0.081163	0.093939	0.257966	0.171957	0.127322	0.158416	0	0.572253	0.41983	0.257362	0.276031
ENSG00000146856	AGBL3	0.134511	0.290392	0.393647	0.215885	0.172336	0.199666	0.112386	0.143754	0.513212	0.400731	0.303848	0.261184	0.179158	0.126115	0.126319	0.50492	0.433515	0.294696	0.165048	0.095455
ENSG00000186094	AGBL4	0	0.000365	0.000809	0.018978	0.01788	0.031538	0.002559	0.000589	0.00046	0.002605	0.028957	0.021763	0.002852	0.0016	0	0.000767	0.0199	0.023524	0.009145	0
ENSG00000084693	AGBL5	4.64768	12.8078	14.2374	2.31754	3.50646	0.968255	1.07127	5.8064	6.83104	4.66677	1.53246	2.02123	1.11945	0.984877	5.16725	5.12029	0.813336	2.14052	0.68877	0.424023
ENSG00000173744	AGFG1	16.7982	11.7607	7.23266	12.2179	8.57226	4.83474	5.59381	17.7488	10.6958	10.1791	9.98953	11.8439	2.77733	4.98269	13.6344	3.03717	11.8852	12.4317	3.39908	4.01255
ENSG00000106351	AGFG2	0.19362	0.152881	0.109351	0.046117	0.045406	0.120912	0.106718	0.246609	0.147193	0.114349	0.022349	0.08284	0.118981	0.06505	0.188112	0.202194	0.069654	0.083384	0.063566	0.051903
ENSG00000164252	AGGF1	8.78625	15.9679	14.1476	9.56945	8.06244	4.13074	2.68435	9.4929	13.5414	18.6337	10.3966	12.6415	3.11404	4.21591	8.78812	14.5747	8.3687	10.8208	3.1656	5.71139
ENSG00000006530	AGK	7.23893	3.85279	2.31841	4.6567	4.28265	1.51389	1.12236	7.49062	2.26768	5.0368	2.96275	5.6469	1.34231	0.960165	7.60593	2.2581	2.46728	2.19349	1.95715	0.982495
ENSG00000162688	AGL	9.40819	12.8138	11.2577	7.48754	7.21784	3.63176	2.57874	9.10948	11.9606	14.757	7.42814	8.89696	3.19688	3.10102	9.60577	13.6541	10.2505	6.97042	4.97682	2.85808
ENSG00000116771	AGMAT	1.9026	0.16021	0.203869	0.262825	0.496156	0.311904	0.316301	2.53641	0.291227	0.141391	0.105588	0.256299	0.343986	0.108541	2.78511	0.13859	0.422534	0.284284	0.146315	0.046039
ENSG00000092847	AGO1	9.03123	10.3563	8.95568	6.15319	6.58117	1.96034	0.991673	10.8098	9.19647	9.11702	6.10181	6.32898	1.52691	1.13285	8.81647	9.67618	5.5442	7.94848	2.15444	1.068
ENSG00000123908	AGO2	11.3205	4.66359	4.26636	3.93666	3.95092	6.23158	1.29488	7.64044	4.26185	2.52576	2.05331	2.48538	2.12686	1.55948	7.85601	3.6043	2.2163	2.91105	2.52959	0.63993
ENSG00000126070	AGO3	1.93227	2.18865	2.13663	2.2011	1.84615	2.86748	1.51219	2.29241	2.95616	2.44102	1.15843	2.08419	0.892005	1.91118	2.11663	5.3174	1.50871	2.11401	2.14119	1.01888
ENSG00000134698	AGO4	5.83658	8.18924	7.39228	11.8907	12.0359	5.52415	2.71081	4.22621	8.2113	6.68432	16.234	12.9006	3.40666	2.13193	5.72244	5.91902	13.5922	16.3789	4.09905	1.74998
ENSG00000204310	AGPAT1	9.54989	9.51024	3.94522	5.08713	9.22597	1.58323	1.6865	14.071	8.07338	5.10187	5.36245	6.00113	1.50604	1.58245	6.93505	4.49946	2.93816	5.61071	1.32292	1.11389
ENSG00000160216	AGPAT3	0.692907	0.522589	0.748533	0.091571	0.410666	0.254461	0.222981	0.032817	0.159446	0.665867	0.06976	0.550147	0.63014	0.063942	0.036157	0.11156	0.298174	0.10485	0.732807	0.420979
ENSG00000026652	AGPAT4	3.91306	7.77209	4.44529	4.59989	5.04465	0.922484	0.758152	5.6356	3.85789	4.95848	3.64004	5.69548	0.813824	0.545811	3.83666	4.71508	4.45323	4.68274	2.20694	0.536133
ENSG00000155189	AGPAT5	43.9299	26.1612	24.705	13.9329	11.0431	2.3702	7.20523	40.3183	24.7849	27.3714	14.6107	13.2193	7.07045	2.31637	40.21	22.45	16.9117	15.0256	4.50892	5.44748
ENSG00000018510	AGPS	16.0924	18.5921	14.8459	24.6025	16.7924	3.94922	3.6824	16.106	18.0415	19.3863	25.3351	25.0556	4.76292	3.7822	15.6774	16.4883	28.7836	26.2055	5.37363	3.42161
ENSG00000106541	AGR2	0	0.193932	0.137204	20.9338	19.7754	23.1186	3.57899	0.023297	0.55187	0.437185	11.7641	30.588	36.3167	9.19109	0	0.338999	39.3051	33.6793	31.9584	9.51174
ENSG00000173467	AGR3	0	0.07711	0.109843	5.14826	2.68255	4.2363	2.63104	0	0.087001	0.296676	2.04804	3.49088	12.6427	5.60101	0	0	9.26819	4.31384	8.94713	6.2223
ENSG00000188157	AGRN	4.10635	2.75829	0.442086	0.307033	0.409735	0.603967	0.13213	4.92536	0.414429	0.22176	0.130546	0.173298	0.047754	0.098239	3.5094	0.168837	0.036212	0.20106	0.031394	0
ENSG00000135744	AGT	0.089804	0.305837	0.215309	0.172423	0.322874	9.60749	7.10292	0	0.226547	0.308578	0.11522	0.046691	12.2357	6.36346	0.043708	0.071873	0.057922	0.205783	8.45262	5.88197
ENSG00000135049	AGTPBP1	29.423	34.7185	14.3313	25.5573	15.9876	3.07992	4.23229	35.3593	14.3242	53.78	17.0488	39.6805	8.63357	2.2564	31.8752	22.5077	30.797	24.3113	5.24034	4.82532
ENSG00000144891	AGTR1	0.0072	0.311851	0.304178	0.484819	0.562886	0.77432	0.485908	0	0.146677	0.338342	0.614732	0.504951	3.37694	0.522062	0	0.231333	0.72969	0.695493	1.12316	0.614254
ENSG00000177674	AGTRAP	2.9412	1.47437	0.87152	0	0.207686	0.133393	0.162977	4.33689	2.14463	0.347821	0.129932	0.130918	0.196691	0.174741	3.71973	0.63467	0.054496	0.048887	0.149725	0.047268
ENSG00000153207	AHCTF1	13.2719	13.3083	12.1468	8.33041	7.69466	6.24193	4.06442	12.6613	13.1573	14.6753	10.8646	13.0389	5.58317	4.56092	13.0981	12.7471	10.6232	11.8336	6.23451	4.54453
ENSG00000101444	AHCY	45.8189	28.2428	27.7302	7.13422	7.25304	3.7059	4.12958	39.5134	30.4707	27.2881	5.3311	7.9674	4.32239	3.24334	36.8338	31.5189	6.13513	6.43526	3.41517	3.16472
ENSG00000168710	AHCYL1	23.4904	22.2357	17.572	10.3363	7.44373	14.6032	13.3502	24.0862	21.1174	24.7679	5.54443	5.8951	14.0795	11.3661	26.6933	20.9164	5.50681	13.6078	14.2558	6.11708
ENSG00000158467	AHCYL2	2.34608	3.92395	4.95529	7.579	3.1909	0.687855	1.3068	2.24871	2.86723	4.26523	2.20569	6.71249	0.612989	1.402	4.92506	3.19408	2.27655	2.52932	2.42555	1.17504
ENSG00000126705	AHDC1	0.575222	0.40146	0.270575	0.256841	0.239578	0.284632	0.185974	0.434028	0.255831	0.230156	0.127629	0.250973	0.114803	0.122627	0.453393	0.072616	0.091054	0.261514	0.101543	0.032485
ENSG00000135541	AHI1	3.20508	4.87831	8.18531	3.67774	1.75297	5.58986	2.9647	2.95897	5.80818	6.28268	2.56	2.76077	4.12713	3.28551	2.26416	5.1466	2.4647	3.59454	4.19128	3.83446
ENSG00000124942	AHNAK	3.97838	1.56177	1.10931	1.80331	2.60982	11.5265	5.84971	4.60283	1.12761	1.24895	0.9287	2.46227	7.7571	5.97936	3.61684	1.08278	1.3085	2.42648	10.2073	4.39533
ENSG00000185567	AHNAK2	0.162184	0.032086	0.020029	0.125779	0.267001	0.07781	0.183443	0.276732	0.077099	0.024922	0.398906	0.187827	0.096333	0.100094	0.105687	0	0.147057	0.212857	0.071388	0.090872
ENSG00000106546	AHR	3.87356	3.00506	3.166	10.5633	5.58101	16.8446	9.54128	4.17636	1.91221	3.30553	6.14297	5.26267	19.1817	8.87944	3.99855	4.83561	7.79115	5.73953	19.7778	9.6922
ENSG00000063438	AHRR	0.033947	0.036155	0.060592	0.044349	0.034838	0.176858	0.189648	0.035014	0.055006	0.016529	0.02728	0.021503	0.150127	0.134437	0.064572	0.044044	0.023166	0.027573	0.127277	0.101941
ENSG00000100591	AHSA1	42.9876	25.623	29.7046	18.4013	20.4134	5.23917	9.81163	44.6778	39.7337	26.4716	26.6584	10.9979	6.34942	9.62478	44.8671	29.0115	16.648	21.3035	3.87066	10.8229
ENSG00000173209	AHSA2	2.07759	3.61833	3.58473	1.20982	1.09106	7.38005	2.25248	1.86381	3.73473	6.19588	2.73775	1.65632	6.04343	2.21804	3.10759	5.24343	1.71854	1.5732	4.82355	2.41943
ENSG00000169877	AHSP	1.19001	0	0	0	0	0	0	1.85573	0	0	0	0	0	0	2.83804	0	0	0	0	0
ENSG00000186063	AIDA	27.4771	22.9276	20.2788	10.6937	11.4132	4.83007	3.09355	31.9138	23.6218	26.0948	12.1552	14.4137	5.62817	4.7718	34.6023	17.9896	14.4938	12.1577	7.74597	3.33933
ENSG00000204472	AIF1	4.57067	0.077889	0	0.308554	0	1.58074	2.46138	5.62933	0.081513	0.18468	0.205849	0.083001	1.23087	1.72616	5.29787	0	0.414955	0.681531	1.61877	1.77874
ENSG00000126878	AIF1L	37.3807	7.79831	25.5181	5.02537	2.22126	0.767767	0.197105	36.8022	30.4983	7.33035	1.18318	4.98132	0.951999	0.364509	11.1563	27.0446	1.40793	1.58639	0.721348	0.207813
ENSG00000156709	AIFM1	10.3193	9.84206	11.1149	4.59967	5.42237	2.92648	1.40229	12.7321	12.5924	12.0371	4.23416	6.01556	3.3704	1.82215	14.2507	9.79107	3.40723	3.86037	1.61017	1.32632
ENSG00000042286	AIFM2	0.273126	0.038709	0.099255	0.051285	0.281244	0.206938	0.093735	0.285704	0.04051	0.082467	0.072274	0.020831	0.106535	0.135161	0.328994	0.033737	0.072536	0.023182	0.071234	0.045053
ENSG00000146416	AIG1	12.2602	8.10919	12.8933	7.47431	7.53714	5.76931	5.073	13.6549	6.43483	12.9619	7.12118	8.73586	6.59441	4.65889	10.9799	10.55	7.8083	8.23256	4.07048	0.49702
ENSG00000163568	AIM2	0.061974	0.223551	0.247289	0.139246	0.164667	0.163444	0.077355	0.111963	0.262241	0.334443	0.133069	0.183687	0.060371	0.100202	0.069996	0.213045	0.139142	0.130925	0.08845	0.082766
ENSG00000164022	AIMP1	18.8829	13.9323	14.127	10.102	2.06681	1.8175	1.71564	17.8567	13.3001	4.21073	3.02248	7.69982	1.97082	1.72918	18.1606	12.2246	3.21711	2.34266	2.00522	6.10231
ENSG00000106305	AIMP2	21.6821	15.734	7.57594	4.87383	3.76749	1.19138	3.03116	20.524	9.95402	11.6269	2.85312	4.11157	1.80344	1.22576	18.9716	15.344	3.33804	6.42287	1.46479	0.854736
ENSG00000110711	AIP	1.63092	1.53676	1.6475	0.477756	1.80137	0.255767	0.42227	2.73374	1.00217	0.43676	0.315539	0.057474	0.112922	0.143616	1.27804	0.722695	0.080113	0.208055	0.073611	0
ENSG00000196581	AJAP1	0.309485	0.656412	0.625206	11.402	12.8372	0.649353	0.661357	0.425801	0.417164	0.542565	12.6374	12.2815	0.744404	0.664052	0.35423	0.855914	10.6524	15.6652	0.834229	0.450194
ENSG00000129474	AJUBA	5.86211	4.89891	11.3243	2.0176	2.71629	2.23816	1.70234	7.56256	8.60521	5.84781	0.543391	1.87484	2.96766	3.46177	5.8959	5.89235	1.70512	1.15588	3.25014	1.95649
ENSG00000106992	AK1	0.755393	1.87146	1.58843	4.1023	2.52717	0.481106	0.996113	1.66254	1.69973	2.12218	1.41702	1.40854	0.511605	0.437535	1.13882	0.8097	0.440413	1.49504	0.219535	0.087176
ENSG00000004455	AK2	19.6262	15.4898	14.9191	4.85126	6.57202	2.87844	2.87352	25.4651	10.2986	29.8568	4.12315	5.09261	8.83929	3.00757	19.5168	14.4008	5.31431	13.6016	3.33459	2.56343
ENSG00000147853	AK3	16.7529	49.1681	36.5636	24.8791	12.5221	12.4924	9.97793	18.4371	39.5937	52.8741	25.8767	30.4016	16.8971	9.42634	19.6657	32.9833	27.5935	23.7892	15.6544	6.90404
ENSG00000162433	AK4	30.9732	2.5332	0.412266	0.324577	0.364902	0.644476	3.63074	25.0912	0.323973	3.35302	0.256479	0.483463	4.47213	2.62412	29.2679	0.389305	2.95958	0.522125	0.851586	4.0119
ENSG00000154027	AK5	1.57866	0.187597	0.541875	0.475495	1.54255	0.026593	0.013942	0.986094	1.2546	1.31997	0.248101	2.11933	1.03525	0.856178	1.72859	3.28247	0.041466	0.619859	2.07466	0.017793
ENSG00000085231	AK6	12.6327	14.2303	19.8224	7.71175	8.35446	4.00441	7.56003	12.6258	14.7712	17.7053	8.41934	9.29983	6.0511	5.76305	19.3386	19.34	12.2561	8.1974	5.97407	8.31067
ENSG00000140057	AK7	1.43841	1.25758	1.10159	1.2155	0.32626	1.12451	3.60794	1.01458	2.33623	1.50048	0.818966	1.04861	1.44983	3.0935	0.888078	0.778214	0.666778	0.612398	1.5539	2.01775
ENSG00000155085	AK9	0.268982	1.72205	4.27608	2.73878	4.69803	0.51366	1.58667	0.260908	3.07483	1.88333	4.38718	5.89632	1.05335	0.811701	0.60296	2.51829	7.40602	5.13852	1.20316	1.94495
ENSG00000121057	AKAP1	1.63306	6.31696	1.01804	0.957931	1.07319	0.272841	0.195022	1.84714	1.31925	1.1204	0.882921	1.10423	0.291892	0.17617	1.6715	0.870877	0.986882	1.15737	0.264937	0.128129
ENSG00000108599	AKAP10	6.31302	6.17558	8.13017	7.20786	5.23895	3.0802	3.29685	6.92417	6.60281	8.71376	7.33322	8.18103	4.05786	2.42477	7.23031	7.94131	7.83114	8.34219	3.47093	2.37904
ENSG00000023516	AKAP11	7.99461	10.0122	8.38847	21.761	17.8724	6.98163	3.85969	6.35473	7.03581	8.64783	21.805	20.7867	4.73781	3.63741	7.2108	8.45544	28.4563	25.8727	8.62168	4.1402
ENSG00000131016	AKAP12	27.9795	8.79866	4.65952	7.73877	5.74331	7.76815	8.29906	7.79266	7.74614	15.7007	6.21639	11.1392	4.51264	3.39285	10.5243	10.6479	12.7615	10.4799	7.84525	3.04371
ENSG00000170776	AKAP13	7.57739	3.75542	3.27729	2.99277	3.46386	2.2398	1.4075	3.75057	3.94592	4.89051	1.26367	2.65986	2.64981	1.61051	7.07601	6.94837	1.83523	2.97375	3.44876	3.26901
ENSG00000197976	AKAP17A	2.77775	3.15085	2.46803	1.83893	1.73064	1.01008	1.03485	3.27596	2.62201	2.49235	0.924846	1.51417	1.22729	0.892256	2.62831	1.76111	1.64981	1.71688	1.00577	0.445702
ENSG00000111254	AKAP3	0.251576	0.306992	0.308512	0.443144	1.01035	0	0.158271	0.203296	0.250431	0.171427	0.419382	0.407696	0.087048	0.049074	0.081628	0.047229	0.429831	0.26188	0	0.190156
ENSG00000179841	AKAP5	1.38982	0.902637	0.789306	0.395148	0.479287	0.436932	0.253768	1.22249	1.11552	1.33434	0.789017	0.348024	0.755022	0.295228	1.10761	0.716008	0.540914	0.432915	0.303855	0.402659
ENSG00000151320	AKAP6	0.018729	2.82945	1.33252	28.8802	39.2174	1.02377	1.03122	0.011896	0.518585	0.80197	40.9733	43.5067	2.13046	0.344438	0.008346	2.97909	34.6791	44.1492	2.06408	1.36949
ENSG00000118507	AKAP7	0.785335	0.182968	0.941942	1.66349	0.123767	0.230935	0.086857	1.65027	1.33074	0.814352	0.71216	4.39014	0.121998	0.093996	0.72754	0.968762	0.185195	2.78036	0.22715	0.119737
ENSG00000105127	AKAP8	4.78415	4.02738	3.69073	2.03687	1.8646	1.18143	1.06919	4.63928	4.15899	3.97825	1.7991	2.05087	0.941681	0.794032	3.84199	2.15142	1.74079	2.20086	1.02006	0.919225
ENSG00000011243	AKAP8L	7.38926	2.88332	3.38504	3.02275	5.84323	2.43137	3.55757	8.303	4.84707	3.29262	4.35027	4.55873	4.28937	2.17461	6.51678	4.60292	0.973789	3.38752	0.870943	2.13748
ENSG00000127914	AKAP9	9.33496	9.43378	7.12949	38.2263	37.855	9.34314	5.85294	8.52781	7.88492	15.1359	51.1937	58.4076	7.3884	7.81554	10.92	6.68143	66.2614	62.7677	12.9988	6.46108
ENSG00000166452	AKIP1	2.62203	7.61568	4.45988	3.42647	1.58672	2.2079	2.63099	3.83105	6.82766	3.76378	2.5164	2.24572	1.00647	0.856226	3.20661	5.57022	2.18956	4.93009	2.35422	0.955058
ENSG00000174574	AKIRIN1	106.636	40.5654	32.565	36.5638	33.8173	10.6698	11.6945	113.413	39.8106	37.0863	37.5741	39.6939	13.6181	12.1524	100.039	33.0834	39.0803	40.3469	12.3113	11.4728
ENSG00000135334	AKIRIN2	8.84318	13.1336	11.0939	19.4696	15.3784	2.71528	2.19829	9.71428	12.829	12.7785	21.6787	22.6188	2.76386	3.54013	6.83709	11.2277	22.1372	23.866	4.97555	2.10245
ENSG00000106948	AKNA	1.24985	0.259973	0.213792	0.072803	0.142876	0.148633	0.138714	0.625153	0.204095	0.12215	0.062128	0.050452	0.138649	0.139136	0.836364	0.268586	0.012517	0.066263	0.072426	0.069269
ENSG00000117448	AKR1A1	34.2378	20.0315	16.7783	8.80939	12.862	3.13688	4.09295	42.6156	25.2603	17.2628	4.44493	5.34367	3.42595	4.66753	44.1814	18.2281	5.40299	5.84148	2.42786	3.70813
ENSG00000085662	AKR1B1	35.1868	40.5599	39.2884	9.11014	18.3887	1.61447	2.18372	45.439	56.0105	32.5261	5.28687	6.44239	4.49252	1.60308	42.5517	33.2216	4.53622	6.9893	1.02646	1.32928
ENSG00000198074	AKR1B10	0.058401	0	0.072337	0	0.072133	0.431693	1.08312	0	0	0.066891	0	0	0.738734	0.947673	0	0.098349	0	0.202069	0.278961	0.799214
ENSG00000187134	AKR1C1	0.129021	0.395377	0.304556	3.63391	4.43359	1.01126	0.84389	0.161748	0.520096	0.572039	3.65578	5.10294	0.975444	1.3718	0.012916	0.385528	3.41165	5.56056	0.970591	0.747988
ENSG00000151632	AKR1C2	0.002984	0.188551	0.095957	5	5.13588	0.530518	2.0543	0.009315	0.225363	0.147148	4.28864	5.78956	2.15549	1.48419	0.016587	0.051061	3.86185	5.35306	3.20143	1.3598
ENSG00000196139	AKR1C3	0.507862	0.541532	0.010884	0.817704	0.036155	0.06193	0.47885	0.022917	0.011924	0.006755	0.257499	0.705829	0.89914	0.262412	0.505407	0.03592	0.214771	0.686604	1.5475	0.348443
ENSG00000165568	AKR1E2	0.043901	0.222762	0.338456	0.213923	0.187105	0.098953	0.131256	0.204713	0.488344	0.201483	0.076526	0.192675	0.092463	0.052444	0.096372	0.128234	0.246444	0.18359	0.171537	0.034385
ENSG00000053371	AKR7A2	5.27634	7.3298	8.16371	2.65497	3.33536	2.29479	2.92484	8.63389	10.0087	6.72706	1.32145	2.68488	2.79016	2.79778	5.678	8.00118	1.19213	2.46313	1.83624	1.41981
ENSG00000142208	AKT1	1.85882	4.9009	2.06743	1.6439	2.28579	0.30446	0.798586	3.67253	4.86547	0.824236	0.445111	0.96804	0.418085	0.430844	2.27833	0.887702	0.208783	0.994877	0.298135	0.069846
ENSG00000204673	AKT1S1	0.66561	0.885715	0.403515	0.186422	0.506552	0.170021	0.047925	0.810769	0.610839	0.334195	0.190637	0.085835	0.135452	0.086666	0.716637	0.355102	0.063257	0.171374	0.056379	0.018472
ENSG00000105221	AKT2	6.70773	2.5426	4.45202	1.19218	1.60914	0.401044	0.696359	4.23809	4.19876	1.06942	0.155799	0.386462	0.229462	0.248374	7.86361	0.48061	0.153154	0.260517	0.300777	0.134157
ENSG00000117020	AKT3	8.58563	27.4976	4.68902	33.1887	20.0377	5.03321	5.10669	2.87783	11.4098	14.731	13.1261	32.3468	2.89261	2.6189	3.81344	9.7181	14.8574	13.616	14.3576	6.14941
ENSG00000166971	AKTIP	5.94704	3.99174	4.62013	7.9598	3.73118	3.18458	2.19195	3.73718	3.60463	5.84023	8.05354	6.07933	1.42016	1.91597	2.99086	5.03845	4.97482	6.89394	2.67476	2.15626
ENSG00000148218	ALAD	0.891895	1.47853	0.962166	1.26	0.874012	0.625073	0.714006	1.05353	1.32615	0.869969	1.15966	1.34363	0.596767	0.554441	0.911727	1.87529	1.18914	1.03812	0.500281	0.5234
ENSG00000023330	ALAS1	12.6374	9.4731	7.42838	8.0828	8.50316	3.76585	5.07767	14.8646	12.103	8.6007	6.79626	8.36148	5.81222	4.14511	12.6633	7.95727	5.62533	9.11057	4.69754	3.08789
ENSG00000163631	ALB	0	0.086107	0.072868	0.742232	2.05549	0.98718	0.173364	0	0	0	0.115125	1.60011	2.57918	0.217629	0.027765	0.088063	1.10181	0.627285	1.431	0.357824
ENSG00000170017	ALCAM	13.6942	27.013	26.4146	31.266	30.3165	9.64318	1.85285	13.2997	24.2742	22.4047	38.447	39.8749	11.1375	5.94175	12.3782	17.0355	35.7898	40.0425	14.2837	2.90614
ENSG00000161618	ALDH16A1	1.30874	1.15783	0.868397	0.283314	0.282326	0	0.021368	1.43908	1.23097	0.951012	0.198986	0.137547	0.069457	0.113415	0.964305	1.10679	0.215344	0.204095	0.00702	0.025037
ENSG00000059573	ALDH18A1	31.2096	34.6824	30.1762	13.6256	11.6706	6.11733	4.48946	37.6714	37.6537	33.8323	11.3847	15.6752	7.81939	4.29395	35.9329	30.1872	9.99288	13.3466	7.11039	4.30492
ENSG00000165092	ALDH1A1	0.018548	0.02023	0.025851	0.12071	0.065493	4.69789	6.88585	0.028356	0.018731	0.047045	0.663177	0.078918	18.2073	1.43098	0.022507	0.027289	0.635783	0.069739	3.29786	1.38081
ENSG00000128918	ALDH1A2	0.003389	0.004722	0.114152	0.596446	0.028072	11.9323	7.48935	0.004736	0.006623	0.007865	0.019052	1.02214	13.3133	1.37751	0.002952	0.010923	0.031815	0.027201	1.4352	7.62081
ENSG00000184254	ALDH1A3	0.128892	0.124207	0.116361	0.175563	0.082766	2.22968	1.49238	0.25607	0.065484	0.061819	0.138494	0.077681	2.79595	1.4297	0.292433	0.10313	0.125319	0.21235	2.76714	1.23419
ENSG00000137124	ALDH1B1	15.4589	10.3467	8.76739	4.60776	4.03757	1.22382	1.62835	18.0039	10.8369	10.3806	3.83708	3.83654	2.29797	1.59383	18.9822	10.7692	4.53539	5.5031	1.15135	1.4866
ENSG00000136010	ALDH1L2	0.278126	0.176178	0.086902	1.91273	1.78877	0.598262	0.301838	0.260609	0.094301	0.221059	1.85978	1.66849	1.18947	0.239495	0.357551	0.179648	2.01541	2.29889	0.612904	0.231222
ENSG00000111275	ALDH2	2.2956	3.12131	3.40182	3.77018	3.54538	0.754753	0.761233	2.49249	3.47542	2.9376	4.57924	4.53125	1.003	0.752835	2.11075	2.7186	4.44317	4.53188	0.62286	0.722081
ENSG00000072210	ALDH3A2	9.30458	23.6822	14.477	6.673	6.99777	3.03977	3.78043	15.9862	15.9917	18.5223	13.346	13.3599	6.21826	4.99215	19.9454	14.0288	10.5425	10.198	5.6182	3.43602
ENSG00000159423	ALDH4A1	1.94001	0.830104	0.992105	0.299783	0.428885	0.157407	0.331084	2.77721	1.14558	0.261189	0.066178	0.190158	0.101093	0.124557	1.95906	0.446365	0.095824	0.253888	0.029252	0.054383
ENSG00000112294	ALDH5A1	1.25442	5.19268	3.99037	7.44996	6.41265	1.30485	1.65596	1.47597	4.75906	4.72763	4.86958	3.51272	1.08011	1.33676	1.72575	4.64223	4.21288	7.26476	1.71663	1.19326
ENSG00000119711	ALDH6A1	11.5977	11.8618	7.86635	7.8655	4.99155	3.06089	4.01855	14.289	10.7945	11.0394	3.95357	6.24954	3.08628	3.67716	11.4496	7.43616	5.28386	6.25204	2.74226	3.56514
ENSG00000164904	ALDH7A1	20.1175	16.9162	19.8471	11.1456	10.6065	3.91553	2.69435	26.7688	16.3238	12.558	9.42754	10.6953	3.10744	2.46822	23.462	13.8474	7.85206	9.75535	3.23212	2.87009
ENSG00000143149	ALDH9A1	33.4639	18.0618	20.6766	10.609	7.47896	7.76694	6.76103	32.5926	20.574	23.1838	9.98919	9.607	7.81616	6.74072	34.986	19.3246	12.7195	8.4799	7.83795	7.77817
ENSG00000149925	ALDOA	55.6742	22.3348	18.4688	7.3888	13.7061	2.15045	7.62571	72.4542	21.7867	8.46217	2.9743	1.74456	5.61453	2.38879	40.8511	4.56663	0.420972	1.54321	1.67851	0.600021
ENSG00000109107	ALDOC	7.42986	2.31013	0.876301	0.753648	0.587308	0.359162	1.16497	9.28993	1.41909	1.13287	0.244032	0.641734	0.84881	0.396954	7.11604	1.25216	0.279551	0.680276	0.184517	0.105552
ENSG00000033011	ALG1	2.19023	1.85249	1.36668	0.839024	1.49844	0.451249	0.507145	5.24299	1.61775	1.40944	0.532217	0.84068	0.415515	0.556625	2.75237	2.17154	1.03266	1.2781	0.154198	0.325001
ENSG00000139133	ALG10	4.90414	6.59646	5.32647	5.98476	4.9369	1.57707	1.88949	4.80116	4.28864	6.99292	5.21555	5.45963	1.80398	1.67652	3.98367	2.98237	5.05742	6.09103	1.59257	1.00426
ENSG00000175548	ALG10B	2.24477	6.85668	2.81532	8.81239	4.74979	1.81184	1.4226	1.30254	3.22887	3.44839	7.5894	5.04621	1.62904	1.77919	1.73003	1.25274	6.65307	7.8871	2.10163	1.2479
ENSG00000253710	ALG11	8.97804	7.03634	1.73668	3.40018	1.71241	1.20012	0.75265	2.78458	8.65757	8.00755	3.89042	9.10329	0.852503	1.57896	2.15363	5.89512	2.88814	2.65349	1.04045	0.975528
ENSG00000182858	ALG12	1.07639	0.484113	0.375169	0.341397	0.297453	0.339848	0.267516	0.807465	0.502196	0.251853	0.172691	0.239928	0.218035	0.180114	0.791563	0.482507	0.123036	0.219642	0.200375	0.148443
ENSG00000101901	ALG13	8.86059	10.245	12.2826	10.9477	9.09555	6.21086	4.15424	12.703	8.85725	11.1242	13.0835	12.2166	4.80625	5.2195	8.34469	11.3011	4.78077	14.2423	7.0983	0.967941
ENSG00000172339	ALG14	0.067354	1.04415	1.01176	0.70925	0.101496	0.12025	0.024129	0.327745	1.49628	1.46667	0.6772	0.797705	0.045381	0.030768	0.389717	0.164073	0.124878	0.11582	0.063636	0.017014
ENSG00000119523	ALG2	13.0276	6.16041	7.46833	4.59461	7.96342	6.51478	3.76455	13.1114	9.21227	7.17045	5.08956	6.99836	12.1197	7.1509	14.3137	5.35613	7.10306	5.57544	5.95797	6.32586
ENSG00000214160	ALG3	5.91434	4.24904	2.03287	0.378989	2.67215	0.817992	0.310797	6.58389	3.75448	1.00811	0.416856	0.83491	0.618494	0.834014	7.61909	0.969175	0.076616	2.15652	0.243255	0.394343
ENSG00000120697	ALG5	6.67345	10.2574	9.86523	12.8263	5.25282	3.88771	4.97269	9.22977	18.6819	11.8971	10.026	9.56223	6.74177	4.72844	11.821	12.3826	18.3551	10.2662	6.14804	5.58921
ENSG00000088035	ALG6	12.5546	10.149	8.70065	4.86238	3.42418	2.51757	1.88322	10.5574	7.96101	9.62349	5.33201	4.8579	2.55039	2.64518	11.7501	6.39095	6.0383	4.05253	2.96475	2.50804
ENSG00000159063	ALG8	27.1631	24.6641	18.7967	8.63397	9.54383	3.00428	5.00196	24.4136	39.9092	32.8123	6.67591	14.3073	5.8163	5.72586	28.7044	20.8322	8.3599	13.1278	6.96834	6.90255
ENSG00000086848	ALG9	4.92375	11.8898	6.47609	7.61097	5.90111	1.06526	2.20159	5.63841	13.3245	16.0973	7.7248	5.01158	3.49171	2.93717	1.61432	11.9117	10.5772	19.8877	5.01849	1.57829
ENSG00000171094	ALK	0.010556	0.040844	0.055081	0.118122	0.12915	0.045138	0.030037	0	0.047868	0.047284	0.07727	0.123672	0.038606	0.045028	0	0.053328	0.073407	0.16079	0.037472	0.017774
ENSG00000189292	ALKAL2	0.796315	0.091629	0	0.430201	0.285935	4.96184	1.20243	0.875925	0.142414	0.107554	0.660845	0.532201	2.55149	0.84119	0.904544	0	0.788551	0.32599	2.40617	1.34902
ENSG00000100601	ALKBH1	6.40679	4.39685	4.69419	4.81852	1.74017	0.544585	0.690628	5.9981	3.59884	6.24014	2.27677	4.20925	0.724053	0.983684	6.42756	2.15146	1.86847	1.92676	0.787634	0.539205
ENSG00000189046	ALKBH2	2.61865	4.24666	3.03533	2.30029	2.08656	0.608195	0.767172	4.25911	4.12694	2.96848	1.25227	1.54499	0.604556	0.905244	3.79087	3.32302	0.801642	1.04106	0.620468	0.429894
ENSG00000166199	ALKBH3	4.54156	5.08328	3.23995	5.14811	8.5378	1.45444	1.6495	5.20511	5.07512	9.70221	5.28604	5.22854	4.49329	2.131	2.76831	7.45885	3.03173	2.74359	1.90227	1.72939
ENSG00000160993	ALKBH4	1.63824	1.23588	1.60625	0.505802	1.03274	0.369366	0.416373	1.92194	0.974346	1.26347	0.336303	0.5923	0.416611	0.325761	1.90845	0.987694	0.515994	0.657113	0.102342	0.096578
ENSG00000091542	ALKBH5	11.7588	11.6093	9.84271	4.35688	5.78997	0.84619	5.56551	13.1854	13.7251	10.0376	1.29703	1.69949	1.06132	0.952568	12.0534	6.85964	3.27945	1.48255	0.892518	0.691496
ENSG00000125652	ALKBH7	1.22664	0.627664	0.346564	0.227389	0.307796	0.142257	0.048068	1.30236	0.489953	0.161084	0.115863	0.043103	0.156243	0	1.25225	0.819386	0	0.286661	0	0.048515
ENSG00000137760	ALKBH8	4.2655	4.6025	7.06551	2.83436	2.4624	0.780274	0.566142	5.75096	4.82602	5.57501	3.15133	3.95335	0.904644	0.483153	7.26303	4.40341	3.59836	5.03923	0.845533	0.670507
ENSG00000116127	ALMS1	13.535	15.7214	11.0925	6.09435	8.72335	2.93801	2.02355	11.8372	15.703	16.1828	8.3583	9.17819	2.4501	2.35879	12.0764	15.1398	9.57679	11.2185	3.62492	2.93045
ENSG00000230002	ALMS1-IT1	1.8345	0.296696	0.419725	0.062493	0.360624	0.746798	0.56318	1.26075	0.245353	0.611256	0.125282	0.101536	0.255092	0.824571	1.26198	0.16444	0.250673	0.056497	0.578685	0.515125
ENSG00000215067	ALOX12-AS1	0.814052	0.062646	0.05423	0.16914	0.051994	0.19328	0.045012	0.010103	0.63206	0.028872	0.050902	0.029223	0.263953	0.071422	0.010894	1.41423	0.036394	0.048559	0.154615	0.024065
ENSG00000262943	ALOX12P2	0.707823	0.217108	0.167279	0	0	0.032661	0	0.495401	0.015635	0.017362	0.019841	0.01608	0	0	0.869894	0.052086	0	0.071582	0.03666	0
ENSG00000073331	ALPK1	0.015276	0.461736	0.45547	0.131698	0.527939	0.441679	0.114162	0.041564	0.383565	0.321158	0.645079	0.69101	0.52951	0.853537	0.014992	0.238125	0.236949	0.828142	0.625738	0.315482
ENSG00000198796	ALPK2	0.032507	0.135283	0.01351	0	0	0.118696	0.096727	0.072684	0.010919	0.156923	0	0	0.300523	0.136541	0.160934	0.090737	0.013931	0	0.158075	0
ENSG00000136383	ALPK3	1.93156	1.84809	0.775736	1.39879	1.26617	0.417039	0.242702	2.56781	1.02669	0.663486	0.893005	0.938269	0.302561	0.147021	5.31632	0.889676	0.936389	1.72752	0.343958	0.168543
ENSG00000162551	ALPL	6.02242	8.73983	2.51273	0.318504	0.462453	0.292177	0.361103	17.133	3.82293	2.85199	0.138364	0.179293	0.294007	0.268187	10.6625	3.7747	0.087924	0.128216	0.218571	0.174625
ENSG00000003393	ALS2	10.0724	4.12495	3.61572	6.04015	9.12829	3.44872	1.84954	11.3189	3.44856	9.292	4.59965	4.84718	2.29556	1.74041	10.9406	10.6218	3.76624	9.44857	2.16946	1.48666
ENSG00000180318	ALX1	2.75459	3.77874	6.57063	2.62273	1.9092	2.59542	1.29059	1.89462	3.74648	6.83727	1.26473	1.32807	4.98791	1.77995	1.45146	4.75634	1.35295	2.03751	2.04517	1.32063
ENSG00000052850	ALX4	0	0.482066	0.548508	0.430559	0.369524	1.74311	0.782766	0.017818	0.577584	0.426871	0.089088	0.278862	1.28051	0.754445	0	0.540818	0.230323	0.102489	1.09846	0.72201
ENSG00000183684	ALYREF	23.1196	21.9552	15.5656	2.59414	4.11165	1.21356	2.66141	24.4746	15.3498	9.09605	1.38731	1.84163	1.04741	0.700776	20.4216	5.94663	1.36644	1.72825	1.0799	0.71881
ENSG00000106927	AMBP	0.050402	0.581903	0.423407	1.27303	1.97052	0.256632	0	0.104018	0.653905	0.229774	0.4373	0.890442	0.200765	0.044317	0.24482	0.576505	1.16869	0.755334	0	0.110529
ENSG00000110497	AMBRA1	2.21486	1.67469	1.87475	1.55203	1.91265	0.342064	0.365293	2.87875	2.48191	1.50903	0.772826	1.89528	0.40471	1.1078	2.73743	0.987435	0.329334	1.94389	0.383945	0.249128
ENSG00000123505	AMD1	70.1297	58.8265	47.5403	29.6456	27.1787	11.7296	8.8555	74.2077	59.2414	67.3701	27.7497	32.9818	16.247	9.13862	74.1902	40.6474	39.3268	36.3868	13.6828	9.79945
ENSG00000162066	AMDHD2	0.446611	0.21188	0.21871	0.054365	0.105707	0	0.041168	0.448463	0.086532	0	0.082287	0.064261	0.022192	0	0.724609	0.035406	0.027395	0.047922	0.025423	0
ENSG00000184675	AMER1	2.01496	2.31791	2.02153	1.64278	1.59474	0.421398	0.338681	2.02349	2.28561	1.79182	1.34377	1.59659	0.562726	0.340698	2.40793	1.47327	1.25145	2.00225	0.71721	0.205438
ENSG00000165566	AMER2	0.130157	0.503712	0.362735	7.46555	6.37553	0.244619	0.290404	0.073505	0.250546	0.753806	8.86305	7.08971	0.263709	0.257622	0.04693	0.286412	8.18037	8.26846	0.442844	0.203226
ENSG00000178171	AMER3	0.01676	0.031244	0.082418	1.13197	1.14224	0.237736	0.121591	0.01738	0.025461	0.066854	1.1171	1.06975	0.192996	0.118405	0.024512	0.014043	0.907918	1.25716	0.168111	0.075475
ENSG00000159461	AMFR	5.45426	11.166	10.1079	10.2541	8.08699	3.27992	4.93574	6.55005	8.23822	11.7558	7.24974	7.4131	6.06626	3.91014	5.09414	10.2596	8.04147	7.9701	4.56469	3.88033
ENSG00000181754	AMIGO1	0.552424	2.61201	2.40223	2.86615	2.13914	0.620564	0.460215	1.13465	2.54988	2.41006	1.98354	2.38919	0.622781	0.275421	0.672063	1.87328	2.02645	2.52405	0.471247	0.242322
ENSG00000139211	AMIGO2	0.91605	2.10354	1.6047	6.09467	6.98801	1.27998	0.672911	0.752116	1.36821	1.33203	5.75135	9.40033	1.83807	0.954864	0.82627	0.832032	7.05813	8.62635	1.19715	0.697974
ENSG00000101935	AMMECR1	18.5078	16.3723	13.8686	0.483985	3.27658	2.88771	0.291524	19.9639	16.8014	1.85471	3.10594	4.57497	0.312391	0.349299	19.2424	11.812	0.630251	0.48868	2.58341	2.25328
ENSG00000144233	AMMECR1L	5.61028	5.77811	5.2609	5.43911	5.38502	2.07459	1.14034	6.92031	6.67481	6.17722	5.26417	5.67838	2.39756	1.21175	6.05673	5.31068	5.64809	6.41719	2.06515	1.20077
ENSG00000151743	AMN1	3.69285	9.5623	1.2565	14.449	10.6941	0.351298	0.409599	1.93534	9.9406	1.09299	8.48731	10.224	0.411647	1.53553	4.09158	0.916355	3.96143	1.56971	0.456841	2.47264
ENSG00000126016	AMOT	2.23088	9.72875	7.84627	10.3865	10.1612	5.37672	3.07482	1.77186	6.63675	7.76726	7.57039	11.2741	3.99518	3.23954	2.15251	6.2584	12.0716	11.9945	5.45115	3.08943
ENSG00000166025	AMOTL1	1.88851	3.24491	3.03056	2.21621	2.482	3.33888	1.64047	1.83997	3.46	3.372	1.65454	2.26105	2.98243	1.853	1.81589	4.02565	2.11763	2.76824	2.86048	1.84
ENSG00000114019	AMOTL2	1.33211	4.27994	2.98577	5.20734	4.85521	0.806649	1.09134	1.95317	3.18669	3.41679	3.52356	3.26646	1.32116	1.03313	1.69074	2.63371	2.46502	3.94708	1.00271	0.638118
ENSG00000116337	AMPD2	2.08771	2.44102	2.49589	1.09992	1.60231	0.914438	1.58603	2.83894	2.52369	0.894866	0.759283	1.40305	0.613915	1.35621	3.39469	1.73212	0.100728	0.589726	0.430542	0.151866
ENSG00000133805	AMPD3	0.031494	0.026216	0.024361	0.014549	0.022533	0.063737	0.024904	0.052643	0.01825	0.025766	0.021054	0.029395	0.050209	0.026246	0.038232	0.025836	0.025016	0.022597	0.053486	0.034693
ENSG00000078053	AMPH	1.05187	5.84932	3.72521	1.90934	2.14539	0.908855	0.684262	1.03236	5.73704	4.46528	2.17642	2.05303	0.774349	0.824124	1.58429	2.72097	1.82297	2.48325	0.986521	0.736525
ENSG00000187689	AMTN	0	0	0	0	0	1.66723	0.094725	0	0	0	0	0	1.96595	0.34803	0	0	0	0	0.816064	0.221981
ENSG00000240038	AMY2B	1.00042	1.56512	1.57216	3.06888	3.70408	1.3721	0.39918	0.633658	0.85711	0.486647	4.16941	4.92256	0.781568	0.869319	0.342493	0.99996	3.68768	3.98185	1.22205	0.625511
ENSG00000196704	AMZ2	13.6325	16.5764	19.4326	18.6709	11.5058	6.49887	6.61979	19.6611	32.8619	54.2375	27.0225	16.189	10.1742	8.0825	25.8829	40.3073	10.9042	20.751	7.91981	5.47606
ENSG00000214174	AMZ2P1	0.965372	2.62011	2.79877	1.6954	1.31458	1.10403	1.20407	1.3619	2.90069	2.39982	2.38755	2.82855	1.5697	1.34088	1.11686	3.87542	3.10537	2.84311	1.58206	1.58541
ENSG00000153107	ANAPC1	18.3499	7.44631	6.54793	4.21519	4.0237	3.47012	3.01876	17.1756	7.9468	7.23803	3.10182	4.91539	3.2462	2.17733	20.2463	9.56137	5.18802	4.81562	2.075	1.30246
ENSG00000164162	ANAPC10	7.53885	5.31176	5.7071	2.98263	2.73266	4.05511	0.111131	4.71533	7.02972	9.95521	0.210194	4.762	1.68469	2.20458	7.48657	12.2226	5.55841	2.79124	3.198	1.45481
ENSG00000141552	ANAPC11	5.98765	5.09655	5.50883	1.99995	2.10003	1.84624	0.412583	5.20726	3.28604	0.802115	0.537564	0.323934	0.550284	0.810738	6.73515	2.9623	0.653147	0.314859	0.265573	0.136919
ENSG00000129055	ANAPC13	19.4827	41.6581	45.3421	29.5931	29.7317	11.073	13.3357	22.7881	48.5174	48.9595	45.502	44.1165	18.1646	13.9266	21.1696	33.2408	47.1077	42.8831	16.0823	17.161
ENSG00000110200	ANAPC15	5.05167	7.63552	5.13429	2.84854	3.4586	2.07479	1.17647	15.5024	4.94422	4.63914	1.67914	2.45837	0.809175	0.42878	4.63379	4.50771	1.49681	3.82079	0.307629	0.25133
ENSG00000166295	ANAPC16	16.1915	12.3336	12.6707	15.4191	13.7268	7.28141	7.63335	16.1454	16.062	14.5969	14.1274	20.8673	8.20791	8.81639	18.9451	11.977	16.6631	10.2959	12.7139	8.10745
ENSG00000176248	ANAPC2	0.644149	0.383166	0.8801	0.187643	0.155893	0.142364	0.143188	0.535575	0.709609	0.340961	0.047022	0.078163	0.155143	0.214229	0.378768	0.314893	0.048482	0.192794	0.089317	0.10375
ENSG00000053900	ANAPC4	7.56582	9.12536	8.82225	5.08943	4.95122	4.27671	1.72748	11.9535	9.45159	9.3928	4.50682	5.62034	2.34193	1.93989	7.85881	7.56317	4.48416	5.05182	2.50533	0.896941
ENSG00000089053	ANAPC5	31.5735	54.2761	43.1767	21.9487	19.9339	10.6007	12.8976	32.8591	38.1245	23.6768	25.1549	31.6822	14.4474	7.43947	37.4737	45.8148	51.6637	31.0323	12.3612	13.5014
ENSG00000196510	ANAPC7	30.7128	27.7808	24.4759	21.3637	15.0962	3.59624	3.97907	22.6784	38.31	45.93	31.5672	25.7984	6.16549	3.68876	31.0739	31.264	20.576	21.1498	5.37937	2.56083
ENSG00000013523	ANGEL1	3.72303	3.44875	2.084	0.791606	1.12095	0.679104	0.746424	2.87334	2.17755	2.31539	0.510927	0.766311	0.620971	0.556383	3.81564	2.84807	0.701555	1.00278	0.687725	0.38627
ENSG00000174606	ANGEL2	17.2845	18.4301	13.9628	9.41513	7.97804	4.66735	2.93161	14.528	15.6231	13.5423	9.84735	8.52038	4.69363	3.39787	14.4764	15.0964	12.3169	10.7974	3.02814	3.2693
ENSG00000154188	ANGPT1	0.196787	1.0263	1.91479	0.203016	0.515872	4.62333	2.82723	0.171736	1.40998	1.96495	0.109265	0.359418	4.23042	3.35039	0.224628	0.986111	0.37896	0.364103	6.4896	4.39292
ENSG00000091879	ANGPT2	0.037959	10.9366	10.0547	1.40539	0.838172	2.02434	4.10543	0.015746	14.9921	9.04446	0.873179	1.08394	2.49653	2.75559	0	7.1181	1.55374	1.72412	1.57767	4.10759
ENSG00000116194	ANGPTL1	0	0.809511	0.675085	0.192317	0.149349	1.36099	1.52209	0	0.396728	0.791092	0.077569	0.590698	1.94499	0.930027	0	0.947067	0.23281	0.20954	3.47729	2.06995
ENSG00000136859	ANGPTL2	0.886036	2.08146	1.97038	0.306148	0.349251	1.96696	1.19917	1.84326	1.65482	1.14523	0.099323	0.273283	2.61033	1.57661	0.959384	1.06339	0.169512	0.326963	2.03353	1.17376
ENSG00000029534	ANK1	0.121563	0.059496	0.040583	0.359702	0.507398	0.050043	0.037004	0.148469	0.053293	0.027413	0.314556	0.249995	0.045403	0.045218	0.097159	0.056537	0.146888	0.2531	0.060729	0.00542
ENSG00000145362	ANK2	14.107	6.93198	6.04755	25.585	40.2158	4.04756	3.13445	13.0918	6.63814	4.52572	43.504	46.1805	8.55983	3.23565	13.4744	3.42571	36.0474	27.3305	4.96436	3.36902
ENSG00000151150	ANK3	20.2717	11.4708	14.4896	36.573	33.237	13.0914	8.75682	21.0112	15.7837	13.2225	33.6614	30.0166	8.93877	10.3667	8.24857	6.56611	29.5944	39.1701	16.5574	8.61522
ENSG00000151687	ANKAR	0.108131	0.153915	0.217646	0.116424	0.075606	0.202309	0.082614	0.070921	0.124054	0.204491	0.165003	0.144303	0.080208	0.097623	0.030707	0.136047	0.166565	0.109518	0.195099	0.062582
ENSG00000166839	ANKDD1A	0.444618	0.313612	0.123854	0.155399	0.226301	0.33981	0.135987	0.233574	0.254079	0.255438	0.129331	0.084022	0.231565	0.053641	0.394249	0.27045	0.234784	0.139789	0.144617	0.200199
ENSG00000189045	ANKDD1B	0.186227	0.091313	0.042218	0.330782	0.272879	0.256204	0.102503	0.129497	0.061719	0.011357	0.20037	0.735378	0.065083	0.146307	0.090184	0	0.402109	0.273231	0.296019	0.035016
ENSG00000132623	ANKEF1	3.55249	1.61053	1.0442	0.735274	0.710368	0.40549	0.372964	3.55861	0.921185	1.08237	0.708691	0.836366	0.335304	0.251244	3.53831	0.87221	0.919786	0.786528	0.349184	0.255353
ENSG00000185722	ANKFY1	4.79421	5.94501	4.27083	4.84892	5.02259	2.196	1.25211	5.56417	5.59221	5.01212	2.39454	4.26608	2.20933	1.09867	5.43587	3.47777	2.05634	3.70582	1.73525	0.942742
ENSG00000154122	ANKH	0.935068	0.984864	0.572738	1.23309	1.92849	0.655219	0.365307	0.654137	1.97317	0.75117	1.22456	1.39414	0.434261	0.375498	0.751997	0.782239	1.38793	1.47249	0.397548	0.229719
ENSG00000131503	ANKHD1	12.2562	16.6464	16.7803	9.80749	10.5866	6.63839	3.58857	23.2555	20.9613	22.49	9.06105	13.1697	6.22092	6.97957	15.6646	17.8525	9.30857	18.0117	10.5489	2.51677
ENSG00000254996	ANKHD1-EIF4EBP3	6.51482	8.6095	8.03763	5.06128	5.03355	3.62417	1.90145	6.90773	8.8864	8.93521	4.72918	5.81158	2.5724	2.32533	7.27816	9.29454	5.20676	5.9945	4.4693	1.8131
ENSG00000001629	ANKIB1	10.5882	9.00677	10.3676	15.8092	13.8895	6.67213	4.7173	11.9503	10.7111	12.9387	17.2216	19.6809	6.42231	4.96189	12.5343	9.64658	20.9309	16.0324	6.77617	5.45071
ENSG00000160117	ANKLE1	0.564766	0.195208	0.211734	0.110316	0.0712	0.060572	0.055321	0.61556	0.202844	0.229135	0.073229	0.084869	0	0.101123	0.573075	0.096598	0.036813	0.099733	0.033825	0
ENSG00000176915	ANKLE2	9.38846	7.96457	9.65929	4.09762	2.60376	0.867784	1.08958	8.6859	10.562	5.4759	2.49292	3.79816	2.23186	1.32474	8.48568	5.90691	1.81876	2.76772	1.43652	0.601211
ENSG00000144504	ANKMY1	0.064238	0.102268	0.182193	0.094018	0.072823	0.159923	0.088364	0.254405	0.492255	0.076659	0.038696	0.04944	0.105253	0.203407	0.125777	0.060352	0.015142	0.065112	0.178195	0.036922
ENSG00000106524	ANKMY2	5.12693	18.1788	15.4566	19.629	16.3198	3.8873	5.3701	6.38958	19.1737	23.1563	26.7578	24.1802	6.33245	5.89447	7.01958	19.4272	23.7544	24.9631	6.53262	5.50219
ENSG00000164331	ANKRA2	4.01699	7.31997	9.07666	6.75481	8.35188	3.67445	6.21235	4.74682	9.40913	11.0538	9.61777	11.0556	6.14775	5.43288	6.48259	9.21671	9.73086	7.93328	6.17643	4.88837
ENSG00000148677	ANKRD1	0	0.404776	1.09327	0.398552	0.384584	1.76846	2.18896	0	0.262263	1.24676	0.266771	0.483252	6.79515	1.23087	0.100695	0.524362	0.200496	0.478834	3.13974	2.38279
ENSG00000088448	ANKRD10	16.8486	26.6498	23.3483	15.2278	19.8206	11.0165	10.356	22.4342	32.793	24.6481	13.3291	17.9254	14.41	7.69944	37.4273	17.2311	22.2622	21.0307	9.54237	7.36513
ENSG00000167522	ANKRD11	2.532	0.313924	0.245476	0.356947	0.304147	0.318474	0.36848	1.51836	1.94313	0.252533	0.232963	0.221965	0.139783	0.175059	2.89972	0.270673	0.291174	0.268073	0.224805	0.063842
ENSG00000101745	ANKRD12	1.53117	2.65995	2.03878	4.25989	3.82375	2.6902	1.12261	2.69488	3.26157	3.08955	8.40601	5.08611	2.17929	2.90111	4.15953	1.62502	16.4245	12.4142	1.81974	3.33615
ENSG00000076513	ANKRD13A	4.96441	8.00923	6.99708	9.07982	11.2084	1.11634	2.83215	5.65639	8.77343	9.3795	12.685	14.5379	3.55891	0.933955	5.5872	8.08942	9.84395	21.7275	3.72696	0.981276
ENSG00000198720	ANKRD13B	0.445476	0.346583	0.247932	0.369541	0.438099	0.072328	0.048976	0.243784	0.280865	0.240144	0.180867	0.201369	0.035891	0.0245	0.143143	0.136846	0.169375	0.177376	0.069288	0.012916
ENSG00000118454	ANKRD13C	8.69107	10.775	9.51927	12.0389	9.24986	5.56475	4.83559	7.26932	9.67242	10.4913	16.3403	14.4788	7.49008	4.26791	7.22531	11.8691	17.2531	15.3025	7.21915	4.28683
ENSG00000172932	ANKRD13D	0.468929	0.346265	0.32173	0.197828	0.401861	0.120457	0.100001	0.294955	0.368677	0.211841	0.071247	0.254913	0.126907	0.080054	0.259574	0.985933	0.09784	0.104314	0.174448	0.034012
ENSG00000134461	ANKRD16	0.648603	0.93733	1.02278	0.682532	0.713306	0.441605	0.126842	1.34369	1.33344	0.482044	0.588242	0.546681	0.372631	0.232744	0.530552	1.21871	0.381829	0.921822	0.252573	0.218982
ENSG00000132466	ANKRD17	16.3295	17.7084	16.7674	21.6577	16.7755	8.1189	3.75789	11.9317	15.2995	20.5639	21.036	21.798	5.56945	3.69629	16.4687	10.0342	13.7594	24.2899	6.81428	4.67851
ENSG00000180071	ANKRD18A	0.401703	1.34221	1.17588	0.198147	0.131778	0.139537	0.030657	1.26156	0.401784	0.648632	0.452309	0.279301	0.096738	0.079625	0.423173	0.895295	0.212698	0.333605	0.129759	0.112645
ENSG00000230453	ANKRD18B	2.09588	2.43208	2.39631	0.310038	0.143379	0.189576	0.06068	1.24291	2.05418	3.04842	0.261991	0.327816	0.047488	0.111631	1.53807	3.59489	0.359756	0.244888	0.696021	0.068473
ENSG00000089847	ANKRD24	0.414026	0	0.008161	0.038524	0.037174	0.047753	0.029027	0.434321	0.029068	0.034301	0	0.031296	0.015648	0	0.217028	0	0	0	0.017926	0
ENSG00000107890	ANKRD26	3.07805	6.79331	7.84783	4.75912	4.54757	2.1553	2.46656	3.3175	5.77787	8.63795	5.70519	6.88692	3.4062	2.26843	4.34355	5.36139	6.27792	8.39627	2.81921	2.03166
ENSG00000105186	ANKRD27	10.7191	3.72878	4.74668	2.75242	2.13281	1.26093	0.685664	14.6297	4.7292	4.24204	2.8358	2.89746	1.19709	2.75718	11.1981	4.51937	2.54044	3.53503	1.46249	1.02986
ENSG00000206560	ANKRD28	21.9883	8.31948	8.41332	7.3102	6.93257	4.16754	3.05922	22.1605	3.44734	3.68811	3.42708	2.66268	1.82265	1.87789	14.7557	8.94784	4.36024	9.22476	4.9567	3.96403
ENSG00000154065	ANKRD29	0.230576	0.241185	0.144781	0.110676	0.161633	0.077625	0.070616	1.03587	0.126425	0.166894	0.181907	0.137589	0.187703	0.089081	0.128657	0.171106	0.170498	0.288718	0.190995	0.066127
ENSG00000145700	ANKRD31	0	0.428883	0.283566	0.587317	0.580169	0.05298	0.090666	0.05085	0.424528	0.354459	0.461216	0.655914	0.102139	0.044114	0.031451	0.248274	0.584981	0.581513	0.096224	0.074126
ENSG00000164236	ANKRD33B	1.9474	0.220045	0.25791	0.235339	0.11676	0.263193	0.308256	1.971	0.253897	0.323994	0.076005	0.152968	0.186143	0.310235	1.83286	0.139911	0.129196	0.121561	0.372173	0.244594
ENSG00000189127	ANKRD34B	1.28606	0.024945	0	0.065444	0.031263	0.080985	0.197241	1.18549	0	0.115384	0.032475	0.052901	0	0.17604	0.876364	0	0.032976	0.086405	0	0.16275
ENSG00000198483	ANKRD35	0.785014	0.793789	0.615403	0.078306	0.037782	0.032301	0.05871	1.25251	0.728331	0.820742	0	0.031808	0	0	0.804518	0.357786	0	0.070444	0.035897	0.068791
ENSG00000135976	ANKRD36	1.66748	3.85148	4.20216	5.45865	4.51583	5.23125	2.06822	0.971381	4.43365	3.5078	8.87673	8.75055	2.60795	3.22476	1.18566	2.96075	8.86171	6.32971	5.55279	1.79465
ENSG00000196912	ANKRD36B	1.43278	4.9925	5.08524	5.34794	4.89257	5.64758	1.5681	1.64598	5.69878	7.53758	6.57941	8.23185	2.39274	2.58815	1.25564	4.93013	9.07405	4.69229	4.66338	2.16745
ENSG00000174501	ANKRD36C	1.09768	2.15646	2.97033	4.0029	3.64263	3.62557	1.60913	1.21012	2.24506	4.43869	4.70507	3.20858	2.96561	1.77603	1.21417	2.01173	6.17492	2.69112	4.81722	0.851899
ENSG00000186352	ANKRD37	0.119617	0.052775	0.045476	0.200607	0.125312	0.248039	1.09368	0.118313	0.040314	0.137007	0.255278	0.496293	0.374986	0.803914	0.190984	0.067146	0.324388	0.132025	0.374798	0.568348
ENSG00000213337	ANKRD39	1.03526	0.467096	0.28687	0.436114	0.429561	0.136611	0.186139	0.378297	0.379074	0.375804	0.343734	0.380317	0.22125	0.250519	0.244228	0.323415	0.298513	0.327051	0.151752	0.064999
ENSG00000154945	ANKRD40	18.9583	14.6639	12.6648	9.54874	10.131	4.32556	3.83742	19.8809	12.6307	15.7037	10.1361	11.9725	5.18709	3.69923	19.61	14.1202	11.618	12.8202	4.89823	3.37063
ENSG00000137494	ANKRD42	0.376113	0.660554	0.532376	0.5677	0.560338	0.713076	0.969007	0.488054	1.17933	0.366251	0.608302	0.694612	0.768953	0.969205	0.578134	0.244121	0.697568	0.588697	0.918519	0.73639
ENSG00000065413	ANKRD44	0.090042	0.549929	0.501709	0.682725	0.660702	0.285915	0.574809	0.116211	0.401596	0.586508	1.5537	0.733427	0.29136	0.471481	1.54022	0.320159	0.649146	1.27744	0.369961	0.202791
ENSG00000183831	ANKRD45	0.245271	0.632644	0.605864	0.586684	0.17459	0.037317	0.141389	0.109576	0.739105	0.518974	0.222659	0.367461	0.332347	0.493154	0.131123	0.248063	0.26945	0.781487	0.167542	0.118616
ENSG00000186106	ANKRD46	9.86477	16.4043	15.1162	52.0026	43.9364	1.35955	5.51196	12.3756	2.9714	16.7556	64.0567	47.4105	2.23733	4.97101	2.43447	2.66004	27.6793	41.4048	1.55322	1.09532
ENSG00000168876	ANKRD49	5.88797	8.35706	9.57316	5.4554	4.71461	2.86555	3.33829	6.02743	9.94003	10.4036	6.41036	5.6439	3.6249	2.03206	5.05122	9.83534	5.19086	5.68804	2.56884	2.00021
ENSG00000151458	ANKRD50	10.9787	8.12522	6.96401	19.4807	17.8587	8.65195	5.31933	10.7596	7.79891	9.07763	24.9888	23.8555	7.32566	6.34524	9.51012	7.48447	24.4534	24.612	10.3117	5.41915
ENSG00000139645	ANKRD52	1.89777	1.27416	0.777538	0.923302	1.4902	1.14041	0.79759	1.45332	0.81952	0.610013	0.577679	0.572771	0.842582	0.53063	1.3772	0.713997	0.313566	0.977375	0.575002	0.224909
ENSG00000100124	ANKRD54	1.33277	1.57789	1.99581	1.25374	2.30005	1.28691	0.788802	2.56993	1.97395	1.23058	0.729722	1.06335	1.32839	0.932179	2.04286	1.78596	0.615511	1.18144	0.333894	0.230606
ENSG00000135299	ANKRD6	0.560793	4.79239	0.241662	0.543871	5.44488	0.243553	0.398372	2.40402	4.94691	0.884473	0.369081	6.34609	0.704433	0.266226	0.398782	0.205357	1.1949	1.29858	0.224127	0.058027
ENSG00000156381	ANKRD9	1.14712	1.11962	1.01267	0.180873	0.316636	0.135205	0.229408	1.10285	1.08504	0.58758	0.182569	0.271728	0.297831	0.185937	1.04807	0.589335	0.11017	0.13134	0.100894	0.11071
ENSG00000064999	ANKS1A	3.26708	2.68009	2.23367	4.65708	4.94772	0.725586	0.725469	3.44751	2.027	2.07329	4.19434	4.53997	0.759062	0.669981	3.44894	1.92885	3.69459	4.85928	0.807105	0.440094
ENSG00000185046	ANKS1B	0.659902	0.020454	0.032141	1.35426	3.11723	1.28844	0.013792	0.022294	0.237963	0.443954	3.52389	2.53604	1.20219	0.181149	2.06579	0.598472	4.85019	1.64262	0.346412	0.230438
ENSG00000168096	ANKS3	0.807743	0.357281	0.890596	0.164552	0.312659	0.124024	0.075102	0.214129	0.90863	0.371298	0.104936	0.145714	0.067811	0.090625	0.178345	0.799687	0.103542	0.584638	0.115026	0.066065
ENSG00000175311	ANKS4B	0.118188	0.04613	0	0.025762	0.111868	0.248618	0.022797	0.138337	0.047798	0.05388	0	0.07252	0.591829	0.202898	0.091579	0.039807	0.121966	0.188763	0.333981	0.106846
ENSG00000165138	ANKS6	3.51784	3.06892	2.14726	0.591393	0.636169	0.586326	0.770216	3.91305	2.99377	2.44529	0.401513	0.478712	0.512914	0.577311	3.33804	2.73103	0.389433	0.495418	0.825035	0.212008
ENSG00000163516	ANKZF1	4.08398	2.69556	1.8515	2.22371	6.21094	2.80967	2.38326	4.28134	3.77227	6.52433	4.00509	4.15858	3.94314	2.66299	3.62845	5.78712	3.74716	2.66924	2.70206	1.67869
ENSG00000011426	ANLN	40.2453	37.7541	28.7139	2.02194	1.72347	2.52149	1.35594	42.7266	27.4312	46.7012	2.72404	2.62066	8.32051	2.24958	38.6009	38.5748	6.43041	5.07522	3.0854	1.8905
ENSG00000131620	ANO1	0.301106	0.005908	0.007499	0.054704	0.074919	0.200084	0.142164	0.26316	0.024605	0.034808	0.039223	0.031284	0.601695	0.100759	0.243009	0	0.015697	0.041121	0.218913	0.095772
ENSG00000160746	ANO10	16.1273	0.441318	0.527085	0.371233	2.08246	0.199505	0.126939	18.567	0.487761	0.520524	0.429328	0.45215	0.18328	0.139146	3.69358	0.554195	1.99791	0.383617	0.284391	0.110408
ENSG00000047617	ANO2	0.045739	0.051271	0.01665	0.001737	0.010947	0.028744	0.007836	0.050425	0.027223	0.024855	0.001722	0.007038	0.00703	0.084095	0.054665	0.029603	0.005232	0.001553	0.016585	0.001517
ENSG00000134343	ANO3	0.004747	0.005743	0.008239	0.007825	0.008732	0.037096	0.005877	0.000706	0.002055	0.002322	0.001737	0.006973	0.017688	0.004701	0.004378	0.003379	0.015729	0.013277	0.021468	0.004611
ENSG00000151572	ANO4	0.027755	0.004382	0.002263	0.025589	0.02925	0.116601	0.042585	0.030696	0.003658	0.006133	0.03631	0.044572	0.052495	0.053564	0.01876	0.007731	0.032965	0.031665	0.112462	0.032002
ENSG00000171714	ANO5	3.49972	4.34865	4.33089	8.81722	9.49399	2.35292	2.35467	3.42759	4.45844	5.16994	10.6151	13.2713	2.36162	1.92472	2.95372	4.78648	13.3541	13.9491	2.90519	1.51436
ENSG00000177119	ANO6	14.619	9.84309	6.58321	1.56432	1.56682	1.78506	4.93263	16.4746	7.11581	10.4246	1.52867	6.21478	2.12214	1.52071	15.0424	9.03794	1.95469	8.147	8.14078	6.59342
ENSG00000074855	ANO8	0.188812	0.415789	0.404644	0.643206	0.622431	0.081113	0.176475	0.32796	0.429169	0.182521	0.816507	0.440524	0.245184	0.017986	0.253481	0.477811	0.212686	0.42278	0.048735	0.065882
ENSG00000011201	ANOS1	40.5448	4.56098	1.95557	25.3581	21.5916	3.06596	4.9714	36.3711	2.05358	2.94102	20.4969	21.8507	3.35662	4.64598	38.0259	2.36997	18.9072	17.4005	3.83584	3.17733
ENSG00000140350	ANP32A	57.3954	94.8741	83.5393	37.5995	34.9181	9.8089	6.20721	70.7687	89.4226	88.2515	45.3339	46.9127	13.231	7.95035	75.0027	86.7817	38.0893	43.8244	10.1391	9.02607
ENSG00000136938	ANP32B	1.65167	16.339	16.3087	6.11795	4.78595	4.16868	3.27528	5.24637	22.635	17.2752	3.76419	1.78582	4.18626	0.689647	7.18584	19.5953	1.23661	5.17126	2.82361	0.543952
ENSG00000143401	ANP32E	66.7362	93.8949	71.2303	20.0884	15.1848	8.46413	7.06141	56.8791	71.7564	78.6897	18.4648	22.2474	8.66497	7.5107	57.8741	57.5069	24.4264	21.0458	7.80555	5.52489
ENSG00000166825	ANPEP	0.309462	0.020608	0.069929	0.156037	0.279183	2.04473	0.855656	0.174988	0.243122	0.045744	0.026828	0.106757	0.83904	0.287547	0.040911	0.035214	0.026973	0.069444	0.347468	0.284278
ENSG00000169604	ANTXR1	7.8029	15.9411	12.8259	3.38529	3.22302	8.19555	6.45091	8.13086	14.085	12.9575	2.27002	3.43243	7.76039	5.61132	9.48895	12.5198	4.07074	4.16033	7.14116	4.62972
ENSG00000163297	ANTXR2	0.489539	10.4031	10.0974	1.10544	0.698507	0.743517	1.4266	0.341473	7.46841	5.17391	0.654449	1.87161	1.37938	0.738394	0.623358	6.55948	1.35501	1.27134	1.12669	1.0057
ENSG00000135046	ANXA1	0.140918	0.131832	0.139406	1.44955	2.14299	28.7134	27.1791	0.114167	0.096871	0.025578	1.1736	1.71271	34.1481	26.5631	0.0876	0.075213	1.32974	2.33392	33.3781	18.6176
ENSG00000122359	ANXA11	6.86766	0.604979	0.626338	0.403375	0.607426	2.17095	0.996724	3.11129	0.642884	0.647771	0.170467	0.361406	1.10157	0.753588	2.90676	0.673659	0.14029	0.422479	1.13135	0.602189
ENSG00000182718	ANXA2	16.8427	71.1982	78.9021	45.6895	39.8576	56.797	37.1052	23.48	92.8435	71.4894	36.1632	45.2613	54.4318	30.8784	26.0835	73.332	15.7552	32.4645	49.3349	29.1547
ENSG00000138772	ANXA3	9.651	4.90841	2.36727	10.9069	11.8944	6.94963	7.00198	11.0738	1.92532	7.34566	8.87673	15.1607	12.2293	7.88313	12.5854	2.47697	4.93395	10.8038	5.94421	8.48822
ENSG00000196975	ANXA4	0.385867	0.233588	0.222051	0.390525	0.303644	0.860452	0.579687	0.547774	0.20678	0.167478	0.408197	0.272501	0.752721	0.441317	0.320588	0.17414	0.421959	0.309549	0.936473	0.537677
ENSG00000164111	ANXA5	108.055	79.6723	80.7524	14.66	16.1954	29.9352	34.872	116.571	83.2048	97.4938	6.8648	11.3325	28.6933	34.935	113.963	59.7411	11.1968	11.1472	23.3888	20.917
ENSG00000197043	ANXA6	5.86069	12.5715	10.6009	1.56402	1.61587	6.52697	5.89017	13.5797	13.4579	8.64042	0.613772	1.38461	7.63805	4.12106	6.65767	9.48313	0.568833	1.18945	3.72157	2.95659
ENSG00000138279	ANXA7	26.6788	17.1224	12.606	6.97832	5.94672	8.50279	9.76685	33.5533	14.5249	17.5958	6.57932	7.2667	10.2988	9.90264	33.2665	16.1033	6.08838	6.12146	7.92452	7.73509
ENSG00000136250	AOAH	0.029308	0.057197	0	0.150055	0.072398	0.257699	0.168894	0	0.058678	0.033569	0.037603	0.31682	0.545663	0.179876	0.057056	0.098711	0.075612	1.05027	0.03405	0.132477
ENSG00000002726	AOC1	0.011946	0	0.014644	0.237092	0.235172	0.196899	0.105	0	0	0	0.063521	0.076966	0.10257	0.07721	0	0	0.047979	0.187553	0.068609	0.027974
ENSG00000138356	AOX1	2.55841	0.288125	0.278292	0.151354	0.132602	0.587877	0.546581	1.81117	0.332703	0.190349	0.100724	0.109401	0.699033	0.33595	2.47725	0.36258	0.11336	0.191409	0.799892	0.242752
ENSG00000138660	AP1AR	13.1752	18.4385	15.5923	23.7398	19.5804	3.36072	4.81185	11.645	15.4442	17.6458	29.1333	22.6411	5.02348	2.92403	12.6932	12.2523	30.0582	16.8521	4.33141	3.19067
ENSG00000100280	AP1B1	5.10423	1.5167	0.847878	0.345468	1.76263	0.257962	0.533004	1.56131	0.895342	0.258213	0.255423	0.570962	0.151522	0.553214	3.48179	0.327739	0.177157	0.259183	0.166887	0.074718
ENSG00000166747	AP1G1	19.3846	27.5129	16.6556	19.7047	10.1256	5.75415	4.11939	26.0275	11.326	20.7184	19.8432	17.7187	5.63205	4.12204	11.3558	10.1313	12.9784	13.0329	6.53286	3.87431
ENSG00000213983	AP1G2	4.04574	0.617626	0.821149	0.702752	2.35583	0.585706	0.613565	4.22424	1.51624	0.742997	0.206713	0.392103	0.475272	0.311475	4.37668	0.786251	0.104773	0.23822	0.395844	0.151861
ENSG00000072958	AP1M1	1.52822	6.84319	3.25662	2.40772	3.97498	3.6642	0.990493	1.51984	1.75005	2.40091	1.37481	4.68415	0.510939	1.65963	0.884273	8.73857	0.8593	4.02819	0.31068	0.539992
ENSG00000129354	AP1M2	18.8816	1.83606	1.94369	0.706609	1.83197	0.982287	0.21119	23.7326	1.11248	0.906403	0.90037	0.382208	1.08796	0.040449	19.1613	0.305238	0.356057	1.08757	1.30316	0
ENSG00000106367	AP1S1	8.85693	16.9724	17.0352	4.2711	10.7627	0.808812	2.36301	12.0694	20.9995	6.34619	2.67664	8.58381	1.66957	0.954741	7.43014	14.0884	1.98626	7.98372	0.796832	0.52323
ENSG00000182287	AP1S2	278.183	111.069	115.303	172.663	27.7792	12.7529	20.2675	284.556	105.027	47.3317	210.048	137.702	10.875	21.6711	248.322	69.9379	44.0619	182.006	10.8892	15.4375
ENSG00000152056	AP1S3	0.821377	0.191389	0.089467	0.165149	0.157186	0.265671	0.112462	0.472997	0.196274	0.183814	0.085676	0.091506	0.136579	0.147452	2.38245	0.227454	0.082461	0.091059	0.245501	0.066171
ENSG00000196961	AP2A1	2.70972	2.68737	1.2737	1.0439	1.50803	0.683536	0.653879	3.37123	1.96894	1.35486	1.25143	1.12401	0.757501	0.559089	2.86665	1.51335	0.820716	1.49492	0.405817	0.517001
ENSG00000183020	AP2A2	3.63044	8.23708	6.91875	3.77926	5.34724	5.2168	0.783897	5.12998	6.65065	7.28081	3.10917	4.60889	1.4929	2.22643	3.0105	6.61342	4.62943	5.98925	3.17212	1.63001
ENSG00000006125	AP2B1	47.8768	11.2027	21.7282	23.2835	30.5704	13.8298	6.86659	60.0152	36.4333	31.3776	46.111	44.0416	14.8455	9.25412	69.4858	30.2816	23.6457	63.0601	21.8927	5.41649
ENSG00000161203	AP2M1	77.4332	40.2542	23.559	18.4596	33.7237	8.28236	12.6054	48.0492	25.6754	14.7045	13.963	17.8227	9.64453	5.56879	64.75	21.737	6.23154	19.3277	3.21112	3.81215
ENSG00000042753	AP2S1	26.8648	14.1726	14.521	5.57564	9.46954	6.24467	3.7619	30.5855	18.0949	14.3199	8.26343	9.45723	6.31211	3.82373	29.0812	14.8013	3.54518	7.35014	2.59162	2.37708
ENSG00000132842	AP3B1	13.9317	20.284	14.8613	3.18877	3.51838	5.12454	2.45948	17.0448	19.857	23.7337	4.37854	4.09624	6.35635	3.18558	14.64	20.5263	5.05729	4.07292	7.04717	4.48728
ENSG00000103723	AP3B2	0.288553	1.1157	0.420829	5.90977	3.02945	0.211122	0.061854	0.428403	0.90042	0.391394	0.976548	1.57098	0.134147	0.074195	0.401295	0.207441	0.856642	2.41298	0.0752	0.023839
ENSG00000065000	AP3D1	9.34371	4.44051	2.72256	3.87772	4.57425	1.26414	1.1678	9.73016	6.77011	5.75859	1.71388	3.53483	1.35731	1.48558	7.95947	4.30182	1.71103	4.3282	1.00368	0.633517
ENSG00000185009	AP3M1	10.4517	27.7307	16.5032	13.5586	12.9928	4.60912	5.02769	11.4407	18.7883	34.0479	18.7193	26.359	6.24319	4.86539	20.4688	19.7136	18.7786	19.5188	6.06432	4.16646
ENSG00000070718	AP3M2	3.91748	12.2061	10.8351	4.73695	5.71767	3.65029	3.38922	3.85289	8.6771	17.4138	5.45244	8.36254	5.12086	2.82441	4.81508	9.68906	6.25481	7.10032	3.02925	2.83131
ENSG00000177879	AP3S1	31.5885	33.8029	37.3361	34.5808	27.672	14.5982	15.4006	34.355	35.6535	37.8316	56.0083	46.2183	9.58037	14.2518	34.5954	22.47	36.1823	43.5387	10.7609	14.4872
ENSG00000157823	AP3S2	6.91074	15.647	9.71012	12.3777	8.68193	3.72602	2.60225	7.33708	8.47152	11.1579	10.8023	9.3167	4.51735	3.20775	12.1918	10.1889	7.05243	8.80696	5.59033	2.69789
ENSG00000134262	AP4B1	2.90461	2.89382	2.49842	2.08946	2.9554	0.813496	0.389602	6.28673	2.75951	2.72306	3.05362	3.11312	0.928786	0.642741	2.45827	5.38347	1.83668	4.7707	0.350542	0.254303
ENSG00000081014	AP4E1	3.91042	5.32859	3.95571	3.48839	4.10112	1.14115	1.05625	4.07013	3.84786	5.4249	5.09171	5.61513	1.3804	0.874621	3.6875	3.69034	5.42608	5.47293	1.94116	1.28227
ENSG00000221838	AP4M1	0.895226	1.25169	0.617425	0.521809	2.31061	0.161337	0.24079	2.2962	2.08692	1.04584	0.237721	1.8983	0.138993	0.094449	1.20665	0.982931	0.193934	0.511124	0.154289	0.220347
ENSG00000100478	AP4S1	2.04039	1.55209	2.78929	3.62597	0.894297	0.571448	0.395581	3.09724	3.71399	0.984299	4.26333	3.84275	0.308269	0.259067	3.54329	2.75509	5.11706	0.808911	0.100959	0.790445
ENSG00000254470	AP5B1	0.532654	0.680271	0.310213	0.054467	0.157414	0.314991	0.239909	0.832286	0.580078	0.587781	0.109464	0.22234	0.173441	0.225051	0.845728	0.533713	0.081381	0.238125	0.252434	0.142586
ENSG00000053770	AP5M1	9.59705	6.56712	8.19317	11.4937	9.3791	4.34332	4.03448	13.4304	8.33178	9.42142	11.5409	10.0927	4.23722	2.74173	11.348	7.34492	9.87061	11.3318	5.72321	1.73528
ENSG00000125843	AP5S1	0.224668	0.557576	0.255071	0.47161	0.455081	0.434718	0.144035	0.229521	0.517713	0.406075	0.3211	0.245962	0.215189	0.141102	0.27684	0.407718	0.37142	0.467799	0.109287	0.133127
ENSG00000120868	APAF1	7.02572	10.5544	9.42535	6.82395	9.45153	3.72382	2.07866	5.25631	8.1585	8.43781	9.45739	8.78949	2.89139	3.7177	6.34795	7.96649	10.4101	8.96866	4.62644	2.60472
ENSG00000107282	APBA1	0.130181	0.123107	0.153008	3.22732	2.14984	0.30267	0.119196	1.70482	0.053206	0.136915	2.43334	4.29508	0.20331	0.131676	0.192935	0.099775	2.59561	4.09327	0.330451	0.108587
ENSG00000034053	APBA2	1.60125	1.99915	0.211648	0.265691	3.90892	0.069465	0.042908	1.73491	1.27802	0.184666	0.250506	0.288701	0.056215	0.030623	0.58991	0.165593	0.144909	0.265753	0.065067	0.018817
ENSG00000166313	APBB1	1.69258	2.6874	1.92365	3.05074	3.86894	0.479591	0.52029	4.82582	2.29532	2.02925	1.79288	2.18279	0.457159	0.360702	3.09949	1.65792	0.986064	2.50063	0.214647	0.195168
ENSG00000163697	APBB2	5.60618	8.98027	7.73527	25.6157	22.2051	1.20686	1.01551	10.8958	11.142	6.09951	13.0835	8.21912	2.1113	0.89283	5.58355	10.7414	12.4397	29.2754	1.69054	1.14037
ENSG00000113108	APBB3	0.46863	1.0148	1.31692	1.72458	2.39853	0.757141	0.37628	0.645172	0.938919	0.628557	1.10362	1.34626	0.892138	0.630034	0.6399	1.13036	0.887997	1.0994	0.560729	0.348436
ENSG00000134982	APC	10.6356	4.36069	9.15187	49.8139	49.4607	1.69651	2.23768	6.09443	7.14031	4.98151	55.5335	55.765	6.76536	1.67648	8.20766	6.07927	67.4783	66.718	2.85105	4.17553
ENSG00000115266	APC2	0.007285	0.193349	0.06466	0.352171	0.629743	0.015863	0.014054	0.011684	0.095385	0.095066	0.200932	0.233061	0	0.00667	0.007384	0.063372	0.086428	0.242069	0	0.008572
ENSG00000154856	APCDD1	0.224167	2.33122	2.21618	0.828327	0.594603	0.672683	0.976348	0.204206	3.12539	2.50435	0.815775	0.521078	0.87681	0.824276	0.330474	2.46129	0.91702	0.499373	1.10301	0.580038
ENSG00000164062	APEH	29.0914	16.6598	12.3392	2.88059	4.27652	1.04075	5.83234	31.0416	18.6062	3.63644	0.981553	1.76098	1.16507	1.83054	14.1829	5.37611	0.334865	2.87582	0.408266	0.41932
ENSG00000248329	APELA	129.109	2.25344	2.25952	0.084831	0	0.035167	0.063918	137.027	3.03409	2.55362	0.039343	0.138172	0.333601	0.058274	117.192	1.79472	0.12845	0.038156	0.116461	0.03726
ENSG00000100823	APEX1	53.7067	76.5349	66.2829	34.2922	36.3355	6.64712	8.18973	73.3084	86.8032	62.7738	31.072	30.4302	9.94683	8.73895	78.9034	52.7115	22.2457	26.8016	8.4797	5.5872
ENSG00000169188	APEX2	2.9523	1.88296	1.48589	0.768155	0.622991	0.49617	0.485853	3.42889	1.97487	1.26438	0.236388	0.494458	0.564792	0.445154	2.37025	1.91556	0.324717	0.403528	0.292783	0.247574
ENSG00000117362	APH1A	30.4528	32.8454	40.608	13.0687	18.4539	7.00629	10.5164	35.0443	45.6613	32.745	12.0769	15.6427	10.9003	7.27613	37.7403	45.8458	7.21443	16.4	6.15432	5.6668
ENSG00000138613	APH1B	1.32061	1.48643	5.55457	2.7552	1.67914	1.12239	1.31632	1.94235	1.74776	1.7258	1.5075	3.38361	0.885396	2.9296	4.59597	1.4429	1.74517	4.45806	1.14655	0.57975
ENSG00000166181	API5	88.372	92.4422	67.1833	53.3377	47.2798	15.3658	14.5061	88.485	85.6157	92.2645	56.853	67.8812	19.4088	13.9099	83.445	65.853	74.9292	70.5418	12.598	11.3139
ENSG00000149089	APIP	3.43254	12.8415	7.50758	2.57592	5.45159	4.02293	1.12319	12.1166	14.4325	16.999	2.02236	6.49524	4.70198	3.7702	12.3125	15.4003	2.1367	1.56509	1.24827	2.38801
ENSG00000134817	APLNR	0.083254	0.138518	0.105917	0.072969	0.035206	1.82533	0.9559	0.206912	0	0.318397	0	0.02964	2.40786	0.865527	0	0.239533	0.035312	0.032985	1.4407	1.05816
ENSG00000105290	APLP1	0.581542	6.02627	6.45977	11.9092	32.5697	1.4005	1.46331	0.901307	9.79835	4.68596	10.7582	10.6251	1.14892	1.53688	1.39356	6.37056	6.99375	19.8271	1.65168	0.321035
ENSG00000084234	APLP2	40.6985	37.122	19.4912	18.2285	45.7063	13.8108	23.4726	70.8197	23.9849	26.8769	36.1493	21.6871	15.7658	30.8092	26.2272	28.1838	24.6506	27.7562	4.19612	12.6158
ENSG00000101474	APMAP	14.7868	23.4344	19.4098	15.1962	15.1235	5.36615	6.63948	18.0686	23.7737	22.1651	15.3384	15.2553	7.26881	5.90028	17.755	24.875	10.5266	14.8035	5.34147	4.678
ENSG00000158874	APOA2	0.844431	3.92669	7.30806	5.81748	6.12566	2.08725	2.51838	0.497373	3.31796	6.49887	0.554517	4.54563	3.96441	2.63473	0.752925	2.47799	0.841143	6.0519	1.57446	0.749933
ENSG00000084674	APOB	0.254836	0.581066	0.441345	1.83134	2.29895	1.17431	0.224159	0.22137	0.396172	0.416898	0.881311	2.50857	1.01941	0.319496	0.193702	0.29052	2.51356	2.6964	1.10818	0.173373
ENSG00000179750	APOBEC3B	3.24596	0.995242	0.424959	0.170869	0.461798	0.3379	0.419481	6.70917	0.861788	0.383224	0.068923	0.38822	0.299479	0.360142	5.46112	0.283458	0.244268	0.187112	0.34075	0.244643
ENSG00000244509	APOBEC3C	6.62409	1.47584	0.888798	0.278041	0.577216	1.5759	1.04446	5.08802	1.27415	1.04088	0.187345	0.227752	1.10087	0.541399	4.67132	1.03271	0.188359	0.585965	0.738267	0.329199
ENSG00000128394	APOBEC3F	0.527743	0.202073	0.078216	0.256557	0.120807	0.396994	0.106805	0.563567	0.203609	0.296146	0.079004	0.126969	0.552594	0.21481	0.534905	0.238079	0.096857	0.072709	0.171661	0.02781
ENSG00000130208	APOC1	15.5273	2.12488	4.44533	11.6035	11.56	3.73781	4.09666	12.2782	1.82982	2.19889	2.45678	3.97708	3.5487	1.22719	18.7374	4.90811	1.34847	3.76914	2.5735	1.50457
ENSG00000130203	APOE	21.4034	1.12008	1.32004	0.295726	1.8267	3.16254	3.23086	21.8096	0.825814	0.313611	0.094833	0.048822	2.18632	1.27356	18.8293	0.158135	0	0.162458	0.600938	0.211178
ENSG00000128335	APOL2	3.2836	1.60924	1.59855	0.069312	0.372728	1.36288	1.97706	4.57235	1.66784	1.18997	0.06965	0.104409	1.82457	1.7228	2.01291	0.873881	0.17656	0.125955	0.8247	1.25048
ENSG00000100336	APOL4	0.026079	0.012787	0.113942	0.016608	0	0.341841	0.351125	0.011437	0.013249	0.029871	0.03346	0	0.610059	0.216302	0	0	0	0.015014	0.370777	0.206882
ENSG00000221963	APOL6	0.070947	0	0	0.01288	0.024984	1.62504	0.77761	0.040283	0	0	0.012911	0.094492	1.46991	0.841931	0.028114	0	0.065167	0.104924	1.54418	1.01769
ENSG00000178878	APOLD1	1.83543	2.24547	2.25787	1.00625	0.753377	0.457774	0.472983	2.19711	2.56882	2.35853	0.885444	1.13407	0.541544	0.428871	2.29514	2.47486	1.06257	1.21842	0.497522	0.500883
ENSG00000204444	APOM	0.600386	0.824261	0.37275	0.633096	0.423218	0.105403	0.096266	0.763712	0.983105	0.45162	0.063715	0.258704	0.147374	0.085146	0.291964	0.410617	0.055731	0.225841	0.228965	0.225593
ENSG00000184831	APOO	18.9941	19.1216	25.7113	8.9755	21.6255	5.66755	7.58069	35.0819	24.6184	26.2649	18.7856	18.1331	8.38758	3.43039	31.5067	33.7425	21.9093	16.5144	6.14086	12.4344
ENSG00000155008	APOOL	1.6649	3.68129	2.93402	7.6493	4.07927	2.63423	1.35489	1.23091	2.7816	2.04608	2.79799	6.71892	1.83537	2.86474	1.27884	2.01368	10.679	5.20964	3.58332	1.77205
ENSG00000256053	APOPT1	3.27785	6.93657	1.11316	1.98814	4.61284	0.310081	0.238599	4.6519	5.27921	3.52406	1.40566	1.56454	0.255281	0.490492	4.05358	2.33652	16.857	1.30427	0.230547	0.476903
ENSG00000142192	APP	46.2689	24.1784	10.4033	74.1932	20.3242	29.1031	29.0839	78.7847	51.4808	55.7694	7.5278	64.8473	42.939	30.0799	58.3956	37.191	64.5526	79.5739	6.9346	5.17021
ENSG00000062725	APPBP2	8.11502	21.0016	17.9178	19.9377	17.0029	6.78585	6.26656	5.56508	18.3708	21.6791	24.5865	22.3764	8.68349	7.51798	7.38392	17.3356	27.0813	23.5452	9.4433	7.38813
ENSG00000157500	APPL1	19.1541	14.747	14.1178	14.7089	10.8907	6.80261	5.78863	18.5333	15.609	15.9253	12.8067	13.2492	8.03174	5.75762	15.8074	13.0465	13.705	13.7853	9.00183	4.75347
ENSG00000136044	APPL2	6.13374	15.3619	10.3351	8.28746	9.1017	4.32782	3.27585	6.5335	11.7174	15.1759	8.20507	8.77595	6.4636	3.75234	8.73651	15.0501	12.2164	8.55135	5.25467	5.13848
ENSG00000198931	APRT	15.85	2.49511	3.65386	1.27555	3.25566	1.03092	0.656502	22.195	3.38683	1.65428	0.069579	0.590339	0.58617	1.40678	7.52646	1.30418	0.141368	0.458244	0.221733	0
ENSG00000214293	APTR	2.39831	3.20135	3.16331	0.915266	0.966652	0.992649	0.7671	3.5579	1.29462	4.50763	0.96276	0.949175	0.78887	0.657467	2.6664	4.2582	1.10096	3.34537	0.811335	0.424606
ENSG00000137074	APTX	11.7836	11.6774	9.94294	5.37462	0.767344	1.79653	3.08242	10.9288	14.0007	10.9442	6.15461	8.69938	3.90356	2.9983	15.5008	11.8434	0.768563	8.51851	4.76023	0.306111
ENSG00000240583	AQP1	0.017515	0.067006	0.010794	0.011488	0.021419	0.976979	1.13492	0	0.025639	0.109493	0.033765	0.03543	1.38266	1.10573	0	0.029497	0.022594	0.081278	0.851806	0.836248
ENSG00000178301	AQP11	0.46056	0.41842	0.581541	0.9065	0.635301	0.226239	0.082815	0.347002	0.546244	0.188914	0.548672	0.747576	0.402449	0.223515	0.372245	0.144606	0.89821	0.892822	0.101777	0.143151
ENSG00000171885	AQP4	0.206545	0.023724	0.088259	0.199206	0.134987	0.140447	0.138604	0.123945	0.073748	0.013924	0.140375	0.127786	0.101878	0.10689	0.18699	0.102363	0.141135	0.07396	0.337233	0.137377
ENSG00000021776	AQR	22.1278	17.3693	13.4568	10.9182	14.3999	3.95309	3.90168	24.343	16.6007	21.5544	17.9399	15.0921	6.37757	5.26158	22.8473	11.0526	14.3107	14.3702	11.8201	3.72832
ENSG00000169083	AR	0.234244	0.217048	0.150154	0.015185	0.022054	0.067818	0.015425	0.185319	0.171405	0.186877	0.015562	0.028005	0.028341	0.023509	1.51228	0.172907	0.020157	0.021832	0.050563	0.018175
ENSG00000078061	ARAF	3.05188	2.74689	1.54414	0.996119	1.2987	0.490759	0.53047	3.38288	2.20176	1.41443	0.296844	0.571636	0.355876	0.410587	2.36626	1.46583	0.392854	0.504457	0.521476	0.288801
ENSG00000186635	ARAP1	2.69849	1.29617	0.478545	0.375105	0.247982	0.644618	0.861323	1.47992	0.705443	0.453644	0.159805	0.18743	0.356818	0.250371	4.66904	0.361066	0.198411	0.1842	0.752154	0.153321
ENSG00000047365	ARAP2	0.256464	0.215456	0.204267	0.202219	0.12585	0.250161	0.185926	0.307535	0.128159	0.254477	0.124978	0.280452	0.60345	0.188858	0.238929	0.239242	0.256533	0.124807	0.33894	0.173204
ENSG00000120318	ARAP3	2.64904	1.07435	0.873777	0.16038	0.162894	0.029731	0.284718	2.40637	0.741969	0.684095	0.063585	0.184561	0.051616	0.074412	2.54795	0.749199	0.107257	0.153758	0.186761	0.075169
ENSG00000095139	ARCN1	40.4787	35.1393	26.6116	28.6268	27.519	14.4818	14.2304	39.7426	28.1352	34.9811	31.1985	33.7386	19.8274	15.3998	36.6214	33.5821	34.896	41.1239	20.3617	14.3873
ENSG00000109321	AREG	0	0.060308	0.076552	0.625712	0	12.6407	18.076	0	0.125601	0.142284	0.079295	0.269366	22.0959	10.7161	0	0	0.160245	0	13.1384	22.5487
ENSG00000119682	AREL1	8.22764	12.9017	7.14192	9.19823	8.83808	2.51186	3.47911	8.186	8.24495	8.018	8.70953	9.18524	5.70848	2.48189	6.97785	8.20197	6.95673	9.65039	2.4679	1.88789
ENSG00000143761	ARF1	36.3349	28.7994	28.4479	2.83463	26.0078	11.1258	7.33177	37.9584	32.2226	22.0914	2.84741	2.71606	1.99704	11.7754	36.6487	2.98616	2.28703	2.66696	1.63345	1.18169
ENSG00000134287	ARF3	40.1332	29.7612	24.8697	12.448	19.01	5.45874	4.39872	51.2308	27.1704	18.6261	16.839	9.72927	3.51357	2.46094	55.3458	23.6802	13.3808	21.8063	2.77564	1.64407
ENSG00000168374	ARF4	67.0192	65.933	58.5115	68.3745	54.0435	27.9381	30.7991	67.72	58.5587	64.2109	75.8578	67.301	37.0423	28.2229	66.5833	46.2876	92.3606	67.2872	39.0934	29.889
ENSG00000004059	ARF5	23.037	26.0342	27.1693	8.50518	16.4803	3.79698	6.18394	31.2433	27.4813	16.1102	7.41596	15.1686	4.73111	4.43054	28.1676	30.5748	3.91964	12.6696	2.23332	2.60545
ENSG00000165527	ARF6	20.1288	18.5583	16.4252	17.115	14.114	6.93878	4.3849	18.5988	16.5453	17.5088	15.5407	16.5683	6.89009	4.48355	18.206	11.0414	21.109	16.7947	6.71387	4.5083
ENSG00000101199	ARFGAP1	2.56004	0.999025	0.705549	1.32272	1.86363	0.608738	0.453417	1.88658	0.862995	0.537428	0.143966	0.242052	0.514361	0.294045	1.47596	0.234773	0.093159	0.229942	0.119803	0.141316
ENSG00000149182	ARFGAP2	9.94203	8.2931	6.42657	5.83578	5.42779	2.4368	2.24409	12.3596	12.0856	3.51846	2.33469	3.81121	1.28656	1.35948	9.84863	6.42424	1.55858	3.77189	1.31845	0.591763
ENSG00000242247	ARFGAP3	8.62209	11.6934	8.72791	7.36211	7.61928	8.97261	8.21541	9.38867	11.9607	13.3063	10.2264	9.61534	9.78971	7.84974	7.49009	11.6987	10.4889	8.62811	7.62267	6.48099
ENSG00000066777	ARFGEF1	38.9566	15.5452	14.3953	19.12	15.9034	4.25749	2.95268	40.2348	14.9547	17.8728	27.9446	27.073	4.11223	2.99039	44.3918	16.2298	20.7314	21.8326	6.59458	2.81093
ENSG00000124198	ARFGEF2	9.64265	6.9823	5.86935	8.1349	9.08314	4.91808	4.39584	9.86284	7.17942	7.54019	7.73385	8.28149	4.54145	4.45605	8.90462	8.44397	7.89604	8.73291	5.44461	3.77773
ENSG00000112379	ARFGEF3	5.55917	1.02269	0.864026	4.21363	3.9419	5.49583	2.04545	5.11191	0.800367	0.819993	3.63187	4.02264	3.86764	2.82336	5.14531	0.905403	4.53012	4.77985	6.72741	1.87829
ENSG00000164144	ARFIP1	17.4638	16.8428	15.7368	12.2391	9.65271	3.33499	0.410221	18.8453	17.2711	19.494	9.67563	8.28584	3.67512	0.412856	17.095	3.49251	12.6585	12.5163	3.90107	3.82214
ENSG00000132254	ARFIP2	3.42428	3.39228	2.6699	1.55771	2.13934	0.929448	1.08808	4.84194	7.96502	2.12631	1.062	1.15738	1.41939	0.808391	3.98703	2.54442	0.565163	1.5303	0.601563	0.56747
ENSG00000101246	ARFRP1	2.30978	0.50313	2.3494	0.154604	0.438517	0.669251	0.185195	1.80533	0.792954	0.466783	0.218538	0.246776	0.229495	0.095819	1.34609	0.8181	0.066066	0.149723	0.061464	0.053379
ENSG00000081181	ARG2	21.2937	19.0443	20.7876	21.1428	22.4176	1.19463	2.90375	23.4713	21.7529	24.5832	25.8806	24.7102	2.7028	2.79737	22.4069	19.5907	25.586	23.9139	2.01203	4.12803
ENSG00000134884	ARGLU1	15.1892	22.008	22.3628	15.2723	13.4058	7.59542	6.26504	14.7366	27.0136	23.4831	18.1958	18.1089	9.20557	7.29081	15.5429	29.4897	21.6497	13.8091	9.01689	5.69315
ENSG00000175220	ARHGAP1	3.3641	1.06041	0.751432	0.843005	0.93643	0.366571	0.617575	1.93262	0.77948	0.609524	0.321691	0.39582	0.486553	0.364758	2.56509	0.535974	0.23139	0.777299	0.276334	0.242833
ENSG00000071205	ARHGAP10	0.290878	0.330473	0.557855	0.342572	0.312054	0.491356	0.459051	0.640822	0.442385	0.7937	0.408398	0.44127	0.610652	0.446545	0.327226	0.693778	0.707296	0.432941	0.762834	0.391133
ENSG00000198826	ARHGAP11A	21.0002	20.3116	16.8143	2.18598	1.78631	3.33249	1.72883	19.8747	17.315	22.9126	2.01294	2.74487	3.36577	1.38213	20.78	16.74	3.91898	2.70379	3.4936	2.42767
ENSG00000187951	ARHGAP11B	2.05469	4.17213	1.30003	0.057078	0.109538	0.827095	0.200054	0.927334	4.10187	4.02766	0.079559	0.182855	1.52746	0.096767	1.61056	1.30007	0.089025	0.146899	0.298042	0.034126
ENSG00000165322	ARHGAP12	23.4934	21.4406	25.2997	23.6769	19.2281	6.12097	5.10493	26.7841	30.0015	32.7616	31.3027	31.337	7.22993	5.34879	24.0585	26.8702	27.1948	26.2137	7.18507	5.18348
ENSG00000140750	ARHGAP17	8.01299	4.54296	4.55002	2.76842	3.11857	3.00893	2.80561	6.62476	6.77768	8.78709	2.2684	5.14398	1.76012	1.44825	9.20886	6.92127	1.3283	3.90322	2.98609	1.08079
ENSG00000146376	ARHGAP18	1.92299	2.18715	1.91632	1.23683	0.960851	1.16124	1.16415	2.29568	1.42792	2.53675	0.646981	1.01018	1.67389	1.21121	2.42801	1.54752	1.15519	1.23064	2.86053	1.18531
ENSG00000213390	ARHGAP19	14.3914	11.6973	11.7077	2.76225	2.36184	1.14179	0.722454	16.007	7.82349	13.8836	2.02518	4.38708	1.29739	0.925672	16.8031	11.6903	2.14475	2.64314	1.20736	1.02758
ENSG00000137727	ARHGAP20	0.057752	0.154694	0.176708	0.337039	0.489429	2.02562	1.23101	0.044769	0.102185	0.214981	0.295836	0.576886	1.69768	1.25905	0.042161	0.097257	0.521115	0.641006	1.90952	1.22205
ENSG00000107863	ARHGAP21	13.7889	24.3019	13.4605	27.4464	37.5133	9.46003	5.00024	17.1479	17.6995	29.1655	25.292	22.9391	7.48928	5.83452	15.4536	15.8727	25.0843	43.2073	11.1896	4.89301
ENSG00000128805	ARHGAP22	0.25945	0.405161	0.029557	0.341456	0.062091	0.026017	0.014721	0.091932	0.011295	0.019922	0.039167	0.084994	0.005837	0.007075	0.062822	0.009406	0.053932	0.163981	0.029726	0
ENSG00000275832	ARHGAP23	0.675874	0.357214	0.918857	0.152665	0.539295	0.070568	0.027206	0.768721	0.184909	0.019183	1.14864	0.170794	0.13593	0.024146	0.345564	0.032913	0.167616	0.234374	0.05263	0.009447
ENSG00000138639	ARHGAP24	0.017413	0.597449	1.37641	0.019686	0.025241	1.45449	2.04858	0.00954	0.056444	1.35435	0.013402	0.020078	2.62959	1.90153	0.012478	0.067072	0.021229	0.208032	2.91614	0.104015
ENSG00000145819	ARHGAP26	2.14067	1.2779	0.098044	0.04935	0.392384	0.884956	0.069205	2.93775	0.46598	1.51703	0.036556	0.072652	0.20176	1.07388	2.34324	0.073249	0.063006	0.055428	0.653302	0.045419
ENSG00000159314	ARHGAP27	0.189177	0.006956	0.026227	0	0.026326	0.019825	0.041522	0.166656	0.049953	0.015359	0.018292	0.014237	0.029722	0.05001	0.178897	0.012005	0.111324	0.008249	0.025012	0.008056
ENSG00000215769	ARHGAP27P1	7.0679	5.22742	5.09984	2.89104	2.95618	1.06757	0.787005	7.08724	5.68864	5.89862	4.12121	3.74515	1.3127	0.633047	7.37735	4.4614	3.76121	3.68892	1.18914	0.744836
ENSG00000088756	ARHGAP28	1.26236	6.37713	11.7084	0.278846	2.59205	7.87817	4.77529	1.87262	10.581	19.5614	1.7619	5.24127	2.53532	5.17932	0.251663	14.9549	0.799457	5.89071	11.3035	1.44324
ENSG00000137962	ARHGAP29	0.359277	0.58688	0.65557	0.504968	0.500802	2.44111	1.34183	0.314743	0.626842	0.811849	0.279134	0.64941	2.18613	1.86716	0.275189	0.566364	0.63018	0.531761	5.43819	1.46826
ENSG00000031081	ARHGAP31	0.065156	0.054088	0.068276	0.052734	0.043627	0.435761	0.191578	0.07466	0.033415	0.056639	0.013214	0.051399	0.280687	0.240861	0.06422	0.069484	0.04448	0.056892	0.338373	0.120811
ENSG00000134909	ARHGAP32	4.34621	4.70812	5.05118	4.72645	4.10886	2.50892	0.965241	3.83532	6.46931	6.12008	4.81915	4.77622	0.831161	0.709795	4.78733	5.25895	2.83779	5.75148	1.39078	0.499344
ENSG00000004777	ARHGAP33	0.090031	0.89296	0.16307	0.196907	0.653192	0.040784	0.02542	0.187131	0.368798	0.030189	0.138947	0.148972	0.013635	0.013997	0.148473	0.129642	0.016832	0.137099	0.018094	0.006192
ENSG00000160007	ARHGAP35	11.5005	15.0365	11.9414	14.5458	15.5593	3.71977	2.1021	12.4478	13.6317	13.1443	13.7687	16.3032	3.07251	3.04313	12.0594	14.0142	13.0269	19.4641	4.28756	2.04539
ENSG00000147256	ARHGAP36	0.033318	0.091647	0.065424	0.360986	0.196364	0.027611	0	0.082343	0.044474	0.043971	0.133853	0.237696	0.027597	0.007689	0.033538	0.014727	0.260694	0.183265	0.010365	0
ENSG00000147799	ARHGAP39	0.287969	0.278964	0.258869	0.349128	0.424652	0.062489	0.038987	0.282855	0.280203	0.096182	0.135009	0.196954	0.087967	0.162328	0.260229	0.352661	0.27121	0.218138	0.174612	0.047565
ENSG00000089820	ARHGAP4	1.8227	0.704806	0.757468	0.613967	0.57806	0.120904	0.225231	1.88282	0.87047	0.499937	0.349993	0.401183	0.226717	0.115576	1.39776	0.636651	0.167484	0.56427	0.147156	0.171763
ENSG00000165895	ARHGAP42	10.6997	1.81884	2.64586	1.8519	0.95669	3.81946	2.38052	24.4817	1.5562	2.05145	0.116906	0.99602	2.4455	1.56199	13.8758	1.81126	0.333003	1.15769	5.26825	1.53191
ENSG00000006740	ARHGAP44	2.62167	0.154245	0.109518	0.076977	0.073131	1.55334	0.147192	1.0989	1.47688	1.47015	1.24165	1.93322	0.430978	0.132425	0.2818	0.048796	1.0409	0.034376	0.187383	1.11926
ENSG00000180448	ARHGAP45	0.387383	0	0.04208	0	0	0.011958	0	0.363991	0.034236	0	0.03021	0	0	0.009957	0.289438	0.01907	0	0	0	0
ENSG00000100852	ARHGAP5	22.7597	17.8785	25.6762	12.7675	18.0612	15.4681	6.18333	9.37175	21.5717	43.681	15.415	23.4791	7.78519	8.93131	9.53145	16.8267	33.94	21.0044	8.87433	7.10229
ENSG00000047648	ARHGAP6	0.009184	0.078904	0.067102	0.033785	0.036407	0.386201	0.098924	0.00552	0.070098	0.188642	0.019031	0.025579	0.424789	0.103889	0.00621	0.052455	0.040243	0.028976	0.329791	0.045608
ENSG00000141522	ARHGDIA	5.12029	2.00785	2.73165	1.53718	2.53783	0.899342	0.599341	3.06579	2.9475	1.40354	0.680365	1.22287	1.07212	0.394454	3.46021	1.51637	0.627659	1.58368	0.316824	0.649987
ENSG00000111348	ARHGDIB	0	0.041733	0.267782	0	0.017491	0.593727	0.619059	0.044205	0.028924	0.098135	0	0	0.731417	0.174952	0.013785	0	0	0.03294	0.768498	0.064494
ENSG00000076928	ARHGEF1	0.650541	0.324849	0.980307	0.103104	0.095606	0.111636	0.41091	1.24704	0.27655	0.102882	0.031864	0	0.296617	0.029408	0.221405	0.041128	0	0.038607	0.02875	0
ENSG00000104728	ARHGEF10	3.56119	1.64901	1.3031	0.834085	0.757597	1.10721	0.665842	3.85144	1.31583	1.67108	0.258805	0.751909	0.546371	0.616701	4.42448	1.83996	0.479478	0.713996	1.25024	0.82322
ENSG00000074964	ARHGEF10L	1.15439	1.03587	0.751126	0.422047	0.995687	0.165496	0.140546	1.64232	1.14573	0.38188	0.610361	0.604013	0.236173	0.157099	1.01819	0.468283	0.28702	0.596567	0.166498	0.090356
ENSG00000132694	ARHGEF11	5.59826	4.60011	2.61328	4.06598	4.99119	1.53311	2.0209	5.68617	4.16849	3.16505	1.85628	1.69075	1.33747	1.1047	5.30485	3.04909	1.5295	2.35132	1.11691	0.464826
ENSG00000196914	ARHGEF12	10.7965	14.6744	10.6905	15.1512	16.3776	10.4485	8.21572	10.9023	14.3458	6.16987	7.32818	18.1704	8.63862	3.70653	9.93654	5.59217	16.0863	19.4276	9.82185	7.13542
ENSG00000130762	ARHGEF16	0.507235	0.168531	0.115547	0.020133	0.090406	0.049665	0.028838	1.01943	0.07936	0	0	0.03174	0.048659	0	0.374892	0.023866	0.04038	0	0	0
ENSG00000110237	ARHGEF17	0.129252	1.57108	0.662057	0.201842	0.619836	0.28065	0.530189	0.420053	0.606366	0.301901	0.253979	0.527491	0.801425	0.734817	0.118271	0.680619	0.106355	0.26061	0.500161	0.223543
ENSG00000142632	ARHGEF19	5.24911	0.525194	0.512375	0.487014	0.405449	0.114302	0.096	3.70706	0.661602	0.339542	0.070486	0.280254	0.057124	0.021044	2.65081	0.216637	0.106301	0.127146	0.032235	0.030426
ENSG00000116584	ARHGEF2	7.1598	6.14807	1.18633	1.53583	6.77271	0.556187	0.414135	2.70353	1.41342	1.08166	5.59804	4.74128	0.371933	0.294824	2.8678	1.70632	0.7907	3.08276	0.26627	0.189489
ENSG00000240771	ARHGEF25	0.53271	2.48775	1.97338	0.906316	1.70424	1.22029	0.554657	0.810996	2.90378	1.61586	0.481685	0.342602	1.71904	0.384462	1.57746	1.92493	0.31858	1.04857	0.936668	0.701979
ENSG00000114790	ARHGEF26	4.03922	1.99495	1.61116	1.04432	1.23374	0.902676	0.384212	3.63604	1.71935	1.96984	1.64945	1.884	0.594907	0.529514	3.32389	1.83536	1.85931	1.57701	0.842457	0.451549
ENSG00000243069	ARHGEF26-AS1	0.007914	0.009564	0.041609	0.029419	0.061519	0.056374	0.00864	0.005471	0.010669	0.007464	0.09704	0.043304	0.042036	0.005799	0.003839	0.008885	0.109122	0.03787	0.051171	0.011924
ENSG00000214944	ARHGEF28	0.036578	0.629821	0.953488	0.361139	0.032392	0.151237	0.59826	0.023253	0.142998	1.46585	0.053348	0.080007	0.332431	0.060262	0.021344	0.094797	0.052763	0.080314	2.29598	0.04895
ENSG00000163947	ARHGEF3	0.087615	0.166497	0.149193	0.226068	0.185278	0.336262	0.216295	0.12994	0.137236	0.181615	0.271265	0.221944	0.254072	0.253211	0.093561	0.204729	0.266438	0.258039	0.303084	0.153131
ENSG00000213214	ARHGEF35	3.5216	0.735486	0.586242	0.202535	0.766483	0.469189	0.180285	3.73919	0.618617	0.866346	0.674085	0.293344	0.441748	0.270151	3.14169	0.356309	0.377419	0.46196	0.225702	0.119548
ENSG00000137135	ARHGEF39	1.37224	1.63744	1.4784	0.242836	0.133042	0.130302	0.076213	1.4458	1.69292	1.40409	0.141621	0.262326	0.21152	0.110841	2.41299	2.00568	0.081711	0.237684	0.156291	0.089122
ENSG00000136002	ARHGEF4	0.058587	0.011699	0.012356	0.008773	0.018101	0.069413	0.044634	0.057959	0.008773	0.008549	0.007717	0.011948	0.019345	0.047925	0.238864	0.009291	0.002802	0.007603	0.033487	0.01418
ENSG00000165801	ARHGEF40	4.42883	2.31201	1.97061	0.753974	0.776554	1.34329	0.628197	3.2824	2.45535	1.58542	0.224685	0.495853	0.547168	0.500762	3.53465	1.23516	0.192208	0.540735	0.462749	0.271685
ENSG00000050327	ARHGEF5	2.74044	0.477485	0.192156	0.204174	0.277994	0.336913	0.191744	2.52911	0.265828	0.323094	0.069629	0.113105	0.345381	0.218783	2.52695	0.312355	0.077646	0.223312	0.205836	0.116522
ENSG00000129675	ARHGEF6	1.951	0.523809	0.340196	0.408089	0.236584	0.624022	0.321683	2.03052	0.432311	0.434979	0.573366	0.3758	0.697081	0.274901	2.05596	0.726452	0.472733	0.553956	0.742455	0.338101
ENSG00000102606	ARHGEF7	5.65845	6.83536	1.62281	3.53765	12.1275	1.85848	1.11235	4.56151	1.69026	1.99242	4.18047	3.54168	1.20064	1.06139	4.55633	2.96329	3.60123	4.97384	3.42128	1.85686
ENSG00000235875	ARHGEF7-AS2	0	0.63851	0.799298	0.493489	0.821407	0.263023	0.528016	0	0.582639	0.570584	0.767825	1.08559	0.472455	0.485723	0.080818	0.699104	0.979821	0.672547	0.295227	0.091037
ENSG00000131089	ARHGEF9	1.29419	3.02532	6.32222	6.20368	3.90308	1.78144	0.953848	1.69246	5.23539	1.89559	3.34202	8.7045	0.822693	1.00475	2.04693	2.47847	2.40036	8.38402	1.02097	0.761905
ENSG00000117713	ARID1A	7.18677	5.99055	3.87052	3.38392	4.48368	2.81016	1.38848	3.44552	5.20251	3.23649	2.76166	2.79405	2.20053	1.02125	6.44749	5.08957	2.43362	3.26422	2.61552	0.867255
ENSG00000049618	ARID1B	8.13206	4.25305	3.40286	4.71136	4.77549	4.47636	2.22858	5.32095	3.18323	2.53578	2.27561	2.4891	1.92725	2.00468	8.50342	2.36602	2.59169	2.32633	3.62603	1.05443
ENSG00000189079	ARID2	13.3767	10.5543	2.62553	2.05615	2.12452	1.60071	0.732912	17.266	2.78541	8.51097	2.49996	2.52724	1.212	1.14213	15.2588	3.07175	2.71648	12.2047	1.64978	0.835022
ENSG00000116017	ARID3A	4.78911	2.09534	2.23875	2.20316	2.4364	0.768229	0.92545	4.47491	1.81099	2.00205	1.20428	1.14738	0.455737	0.398154	4.33648	2.4148	1.15794	1.63448	0.613927	0.311008
ENSG00000179361	ARID3B	8.05588	2.55713	1.51949	2.94737	3.57575	0.351729	0.240278	10.2326	1.59014	1.66999	1.72961	6.48986	0.297518	0.22706	9.14653	1.34381	1.39951	2.99392	0.057718	0.222154
ENSG00000032219	ARID4A	1.18664	3.5983	1.9639	2.58626	3.11278	0.657275	0.366327	1.73966	3.08599	3.23711	4.81006	3.03963	0.775842	1.15117	1.46132	2.10387	3.6326	1.71822	3.18637	1.09291
ENSG00000054267	ARID4B	14.6143	16.8406	13.6302	13.2707	14.9593	3.95083	3.75433	14.3733	19.6244	14.6112	23.6995	25.5511	4.42718	4.35803	16.017	13.5788	16.2579	24.989	4.75141	4.09758
ENSG00000150347	ARID5B	0.089738	5.0264	3.98374	2.20993	2.55901	4.38542	2.78495	0.109066	4.55521	4.23512	2.14974	2.24735	5.00107	2.77333	0.116985	2.6778	2.10864	2.38164	4.25547	2.78709
ENSG00000166233	ARIH1	6.01611	6.75542	5.42443	8.03967	7.23112	4.66363	3.16829	5.9272	4.54211	7.51788	7.61789	7.12019	5.27589	4.36383	5.44682	6.05563	9.27602	9.10044	7.57963	3.25818
ENSG00000177479	ARIH2	12.2011	15.1161	10.0389	3.90257	7.29785	3.08962	3.22655	24.3366	19.7799	7.72743	8.05469	4.7475	3.71486	1.70083	17.3997	13.5904	6.46906	10.9191	2.11582	4.33241
ENSG00000120805	ARL1	19.6422	19.3465	18.2181	8.42474	8.84916	13.9186	15.9599	20.0629	18.1355	20.5898	11.1574	11.0819	18.0013	13.4403	19.5643	20.282	12.4937	12.5279	17.9986	14.5285
ENSG00000175414	ARL10	1.24388	1.51797	1.24169	1.81524	1.99233	0.881971	0.277361	0.821762	1.00012	0.82418	0.950356	1.26279	0.318458	0.307159	0.7858	1.35264	1.76239	2.05363	0.778564	0.310741
ENSG00000169379	ARL13B	2.32637	4.69098	5.00971	2.95104	1.80387	2.59329	2.80502	2.53401	4.52428	4.84259	2.746	4.35695	2.30772	2.86697	3.5013	4.32704	3.71617	3.17978	2.35384	2.61587
ENSG00000152219	ARL14EP	10.9159	15.6315	14.738	12.2177	9.64312	4.44844	3.20118	13.1418	6.66597	16.0949	16.136	15.6023	6.0354	3.4404	14.2411	14.0418	7.40428	14.8766	3.6107	2.3939
ENSG00000185305	ARL15	3.90879	5.04323	0.111799	4.01646	3.29176	0.591909	0.109875	4.16656	0.103645	0.133761	0.163219	3.50438	1.73016	0.147146	3.87424	2.55256	0.15394	0.11408	0.513555	0.064002
ENSG00000214087	ARL16	3.85269	10.9053	3.74438	2.9879	3.50201	1.41389	2.7849	13.7131	15.0863	3.59545	2.70312	2.86753	2.25955	1.06918	11.5826	4.90825	1.28071	2.37449	0.863924	0.702019
ENSG00000185829	ARL17A	1.83391	2.39917	0.335422	1.11073	0.224224	0.248416	0.909313	3.28591	0.942585	0.548599	0.973358	0.920721	0.124395	0.097561	1.69844	1.52074	0.182544	0.77194	0.205048	0.078446
ENSG00000213465	ARL2	22.9946	13.4214	10.4826	4.92198	4.49327	1.15469	3.6382	29.1745	7.36609	7.39776	2.80611	1.74086	2.32139	1.77377	19.674	5.36122	0.761102	2.03713	0.397162	0.997223
ENSG00000102931	ARL2BP	10.3311	42.9868	43.4924	27.5435	21.8	7.894	7.56468	11.6669	51.2759	50.716	35.0377	32.86	14.7006	9.84222	11.9238	39.4762	34.0387	32.6067	10.6558	8.12945
ENSG00000138175	ARL3	6.14835	13.2267	13.213	10.6625	10.2893	1.78999	2.225	7.01037	14.2282	14.1812	12.667	12.136	2.9025	2.62364	6.43135	16.0914	10.6106	11.7445	1.83249	2.46932
ENSG00000122644	ARL4A	13.038	68.2039	65.2581	9.76331	14.6215	2.54845	3.71596	17.63	80.0947	85.7901	16.1697	17.5157	3.54079	3.17907	13.7955	86.9234	15.8917	19.2483	5.80265	2.98975
ENSG00000188042	ARL4C	5.95579	26.4562	22.2377	20.1993	17.8944	8.31051	12.0608	5.31558	22.8845	28.3293	27.9048	20.6476	9.88728	11.7562	5.85603	15.8273	27.4697	24.487	7.86093	10.992
ENSG00000175906	ARL4D	1.44564	1.65603	3.26505	0.621923	1.15733	0.833337	0.546603	2.13078	2.83259	2.94904	1.52241	2.24957	0.790313	0.631664	1.54064	3.20275	0.973162	1.6217	0.978804	0.575487
ENSG00000162980	ARL5A	24.1143	31.5591	28.5227	16.45	16.3037	8.25613	10.3611	22.1759	24.9848	31.8541	15.3832	14.5083	9.84647	8.03544	21.3586	16.1162	19.1466	13.8419	11.637	6.74148
ENSG00000165997	ARL5B	32.0475	41.2235	35.9573	34.9096	27.772	13.1667	12.4016	30.7822	34.7628	41.4125	38.2901	35.8792	14.6985	10.9879	29.5423	20.763	43.0365	33.5193	17.7679	9.62533
ENSG00000113966	ARL6	2.61055	5.55055	3.82266	6.55171	5.31302	1.01975	1.51927	1.601	2.76901	1.44344	10.3369	8.72187	0.790418	0.644527	2.50965	0.897558	9.03497	6.92641	0.940567	0.645676
ENSG00000170540	ARL6IP1	136.589	184.637	163.889	135.596	100.117	28.4492	25.3526	152.796	187.748	207.549	160.835	148.56	38.8864	29.7855	146.829	168.235	173.437	156.8	34.8828	29.0741
ENSG00000144746	ARL6IP5	22.6864	27.6089	29.8132	44.6055	38.2749	14.5721	16.2072	25.3114	24.1701	28.8759	57.5427	46.536	22.2871	16.317	22.9953	20.9141	57.7001	42.5004	18.5262	15.3056
ENSG00000177917	ARL6IP6	11.9069	14.3184	15.2447	6.86228	3.55988	2.48176	2.86312	10.284	15.7076	14.173	6.88936	5.1795	4.11469	1.66938	8.7471	12.1273	6.1547	4.5926	3.61157	1.61819
ENSG00000143862	ARL8A	7.6561	5.7111	4.90593	13.2163	11.5247	1.58239	2.89036	8.83896	4.35914	5.12199	11.0548	11.7054	3.29033	2.74782	7.41631	6.87634	9.90158	11.033	2.71134	1.95613
ENSG00000134108	ARL8B	19.1044	26.9632	22.114	23.0104	18.2484	10.2521	9.94427	18.3092	25.8905	30.2395	33.4158	31.612	14.7355	10.2678	20.8615	16.238	38.0783	28.8617	13.8794	11.3824
ENSG00000196503	ARL9	0.014967	0.058565	0.130884	0.224147	0.144564	0.047889	0.014579	0.031198	0.060834	0.08383	0.252714	0.233762	0	0	0.014569	0.075868	0.192878	0.170429	0.070428	0.016914
ENSG00000104442	ARMC1	21.5673	25.9772	26.1878	23.1151	19.3297	7.29534	7.3126	22.3936	28.8847	29.8236	32.0556	26.2032	9.51401	7.60761	24.1377	15.4438	31.8106	23.4513	9.5325	6.58032
ENSG00000170632	ARMC10	11.5456	6.31474	13.093	3.22895	4.31948	3.16859	4.42879	15.6345	11.1435	14.3386	9.11349	5.75706	2.52386	3.14794	14.576	7.1046	4.71237	5.50196	2.82049	4.33333
ENSG00000118690	ARMC2	0.185431	0.466406	0.445671	0.423798	0.446775	0.561197	0.418013	0.138965	1.19797	0.603976	0.545933	0.391468	0.353255	0.319698	0.228989	0.594211	0.538449	0.45423	0.393982	0.316431
ENSG00000165309	ARMC3	0.027742	0.534293	0.203457	0.315375	0.253941	1.72909	2.23674	0.028628	0.492195	0.308166	0.717569	0.952309	1.04678	2.53177	0.038636	0.02336	0.769248	1.74401	1.38574	3.40166
ENSG00000169126	ARMC4	0.885462	1.05616	0.765052	0.119967	0.080531	0.171875	0.121777	1.09045	1.51146	1.08251	0.111462	0.136331	0.12818	0.100741	0.853166	1.19606	0.15328	0.134154	0.1407	0.107583
ENSG00000105676	ARMC6	3.25329	0.67929	0.43875	0.300207	0.5105	0.033993	0.066085	1.20239	0.587726	0.263764	0.146181	0.192115	0.072564	0.081276	3.34348	0.387228	0.1007	0.171625	0.041154	0.012602
ENSG00000125449	ARMC7	0.684065	0.278478	0.650366	0.371759	0.135025	0.07696	0.070289	0.964553	0.684709	0.626066	0.046754	0.151566	0.113858	0.221112	0.537328	0.478173	0.045145	0.168255	0.043192	0.039549
ENSG00000114098	ARMC8	9.7595	13.1231	6.85429	11.384	8.84662	5.61612	2.83454	12.0529	11.5228	15.4615	11.1114	10.2958	5.17528	2.8613	12.3769	11.7142	14.3321	12.2322	4.29248	3.32956
ENSG00000135931	ARMC9	3.33098	2.6091	1.65062	1.53339	2.15325	1.91574	4.88851	9.93352	6.15201	2.71235	0.716752	6.19432	5.2433	5.39919	5.12515	12.1087	1.2474	6.53597	0.910422	0.528686
ENSG00000126947	ARMCX1	17.2207	18.1931	21.4478	36.4298	31.0058	4.71657	7.26747	18.4454	18.6966	21.9473	47.0532	45.7829	7.6565	6.68924	16.6259	12.4736	46.9501	35.6108	7.17225	5.17589
ENSG00000184867	ARMCX2	38.6023	23.038	19.925	21.6852	16.8828	7.11718	7.73369	47.8126	21.3454	25.6813	26.1039	24.6993	8.75145	7.35477	41.8515	11.7327	27.5485	23.6902	6.71021	9.12627
ENSG00000102401	ARMCX3	14.8943	19.4553	15.1307	28.2817	31.3625	13.6625	14.1499	13.252	16.5272	30.8363	53.8474	48.94	12.8913	11.5098	13.2713	12.7246	36.6765	36.8519	13.5469	9.26779
ENSG00000196440	ARMCX4	0.800421	0.249254	0.179434	0.303224	0.218184	0.375375	0.195731	0.204941	0.197024	0.400078	0.197096	0.256918	0.146966	0.163736	0.573131	0.196232	0.187433	0.25192	0.329061	0.060763
ENSG00000125962	ARMCX5	6.86416	7.03846	8.0997	6.94634	5.06498	2.27165	1.62343	5.48555	7.00624	7.84624	5.85092	6.89641	1.82427	1.62441	6.32674	5.19655	4.05457	4.16792	2.33462	1.23723
ENSG00000198960	ARMCX6	5.55379	7.60431	6.74853	6.33035	11.8369	2.6284	1.61455	5.74332	6.54477	8.34749	9.33653	11.1255	3.7113	1.0025	7.52522	6.28542	3.66442	10.5088	2.29005	1.40961
ENSG00000146476	ARMT1	51.2735	34.6277	30.1875	19.9071	15.9551	8.34075	7.6033	50.7609	33.2525	36.1916	22.2707	19.9765	11.6827	6.21324	43.7758	19.7142	27.8123	18.6945	13.5272	6.13948
ENSG00000143437	ARNT	8.01382	8.45561	7.54499	2.84691	4.25398	3.36008	2.22405	12.3691	7.80685	12.4207	2.37401	3.76026	4.61623	3.45949	7.76415	6.22905	2.33575	3.7015	4.8656	2.28198
ENSG00000172379	ARNT2	0.272334	3.54244	2.18344	3.37518	2.55511	0.350494	0.794989	2.3384	2.85053	4.30749	1.81995	2.11326	0.675227	0.661784	0.963425	2.16093	0.605575	1.65528	0.274875	0.183188
ENSG00000133794	ARNTL	3.01366	0.152401	1.73374	0.040605	0.034721	0.081205	0.022871	1.30271	1.92842	2.10091	0.023675	0.0439	0.752541	0.499407	2.64281	1.32726	0.027281	0.656594	0.32795	0.032743
ENSG00000029153	ARNTL2	7.02018	10.3816	5.05978	3.01186	2.43241	0.603764	0.699905	5.0583	6.97246	9.09273	3.0378	2.76973	0.876386	0.531137	5.86963	3.89223	7.6521	3.40036	0.985067	0.494805
ENSG00000241685	ARPC1A	39.5462	31.2116	26.9766	24.6778	27.2518	5.16425	5.06104	44.0638	35.888	17.1085	21.5848	19.3066	7.9062	6.65774	39.48	29.0361	9.79164	13.3556	5.8192	1.84889
ENSG00000130429	ARPC1B	1.2698	0.693978	0.363065	0.15948	0.165901	0.330679	0.261371	0.772525	0.527349	0.451799	0.078412	0.136912	0.302678	0.134837	1.01443	0.508798	0.160991	0.144985	0.224236	0.177295
ENSG00000163466	ARPC2	60.4633	45.7529	48.2194	45.5889	47.5281	21.0105	19.5354	51.5253	67.4842	69.7537	50.0409	59.9934	31.1643	19.7522	86.626	56.5716	57.0997	59.3679	21.9277	16.3153
ENSG00000111229	ARPC3	78.2218	74.3643	78.2122	57.8098	54.8424	25.9133	29.7655	83.9001	75.4382	108.012	77.8477	65.7184	37.7999	23.8628	86.8092	90.2733	64.6291	46.9053	33.3556	27.7937
ENSG00000241553	ARPC4	19.506	11.4493	10.8007	8.06004	10.5091	3.019	4.08929	23.7474	14.6308	11.28	6.67453	8.36758	3.44703	2.20162	22.797	11.8231	5.27515	8.61875	2.82148	2.34675
ENSG00000162704	ARPC5	15.1999	28.3422	38.3163	37.5511	23.4307	17.5534	19.2853	15.3602	45.6564	50.0987	64.2087	68.2043	25.0812	17.2013	19.1776	27.6688	78.2952	63.522	24.1175	20.0923
ENSG00000136950	ARPC5L	8.39482	6.34193	7.77015	2.98642	4.11975	2.14033	0.955907	12.628	9.13505	8.07599	2.84016	2.44089	1.53721	1.66108	9.36764	7.47442	5.1122	2.08985	1.13632	1.15512
ENSG00000242498	ARPIN	1.56464	5.70405	3.55761	3.22673	4.44292	2.70884	1.10014	1.37626	3.62249	4.92474	2.179	2.15068	1.85607	0.952506	1.72722	4.08505	1.7492	2.85614	1.13993	0.624638
ENSG00000128989	ARPP19	78.9299	129.354	85.9507	99.0721	88.8953	19.9559	17.9669	94.7317	115.651	97.5406	97.5514	99.276	28.5558	25.8337	114.041	57.7625	118.55	100.941	29.6203	18.1596
ENSG00000172995	ARPP21	0.0035	0.028853	0.014968	0.192579	0.238263	0.076826	0.015199	0	0.001778	0.006023	0.926071	0.20662	0.047711	0.066377	0	0.008885	1.21452	0.634248	0.067244	0.00795
ENSG00000137486	ARRB1	0.457079	0.374456	0.158685	1.17082	1.89967	0.852274	0.09428	0.705332	0.122729	0.123387	0.319794	0.592725	0.165949	0.290884	0.138199	0.101413	0.620554	1.48759	0.141366	0.042774
ENSG00000141480	ARRB2	5.95481	7.34261	3.3863	2.18601	2.67547	0.563724	0.434197	8.95615	5.94289	3.81117	1.50226	2.31226	0.684062	0.470103	7.2189	4.2405	1.61917	1.83189	0.516288	0.249834
ENSG00000203993	ARRDC1-AS1	1.62977	1.45316	1.1248	0.61651	1.38455	0.636182	0.545646	3.05784	2.43535	1.24319	0.711593	0.513181	0.321127	0.400768	1.88206	0.947661	0.608606	0.266578	0.194206	0.16327
ENSG00000113369	ARRDC3	5.26647	26.0734	29.8536	26.9291	27.0614	11.8191	12.0902	7.79428	24.4467	28.5388	31.5104	27.7308	16.0209	12.9551	6.84768	22.4013	33.7899	28.4264	13.7961	12.276
ENSG00000281357	ARRDC3-AS1	0.085617	1.49266	0.14153	0.113816	0.120061	0.205408	0.079073	0.090639	0.629646	0.137575	0.134166	0.102147	0.051382	0.066947	0.060303	0.086911	0.097519	0.112986	0.227861	0.030843
ENSG00000140450	ARRDC4	2.74565	7.93905	6.3018	5.93145	4.21146	4.4754	1.81866	2.93651	7.51966	9.62251	8.30536	7.55028	5.54753	2.27165	3.01396	5.35545	7.95086	7.38549	5.79594	2.15355
ENSG00000113273	ARSB	4.55577	4.27119	0.968794	0.954396	0.942044	2.58095	0.46127	4.03824	1.11231	1.23656	0.758659	5.49392	0.676718	0.5001	0.880981	1.18833	0.945623	1.12279	0.628605	0.332044
ENSG00000006756	ARSD	1.00705	3.26351	1.72666	2.76718	3.57953	1.37478	1.0734	0.815014	2.01181	1.68112	4.48172	2.98068	2.19474	1.24852	1.12475	2.37699	4.00458	3.75292	1.90017	0.662561
ENSG00000157399	ARSE	0.541551	1.50999	2.64341	0.350896	0.813672	0.362477	0.406805	0.355968	2.46081	2.07274	0.416891	0.518001	0.505502	0.089319	0.361797	2.9484	0.174428	0.549804	0.321739	0.267598
ENSG00000141337	ARSG	0.161075	0.187013	2.0346	0.07851	0.067038	0.11686	0.135635	0.172353	0.173407	0.229842	0.075234	1.32771	0.117286	1.58637	0.11908	0.31548	0.070072	0.104072	0.102174	0.05981
ENSG00000180801	ARSJ	0.132073	0.005398	0	0.056116	0.047282	0.279948	0.068983	0.236345	0.01664	0.015855	0.024611	0.037488	1.30275	0.390184	0.096171	0.009269	0.22261	0.155643	0.326978	0.395606
ENSG00000164291	ARSK	5.24096	5.68167	5.36157	1.84645	1.20143	1.65045	2.57461	4.2381	5.55771	6.21172	2.02893	2.01396	3.60767	1.82723	5.54664	5.51348	2.47786	2.12884	2.47686	2.0106
ENSG00000167311	ART5	1.74371	0.354992	0.076096	0.077097	0.113079	0.176181	0.410115	1.44161	0.482928	0.400822	0	0	0.565201	0.10592	1.63517	0.305312	0	0.0697	0.426203	0.206236
ENSG00000173409	ARV1	4.82501	14.3523	12.3234	9.76417	8.50805	1.96405	3.26617	6.98925	17.0909	19.2717	12.4069	10.1761	2.94441	2.34051	7.58423	17.3835	14.1176	11.5765	2.81884	4.25645
ENSG00000099889	ARVCF	0.739473	1.06941	0.480073	0.632016	1.66088	0.115953	0.164795	0.967386	0.720731	0.468837	0.533777	0.591626	0.114554	0.048275	0.386621	0.378381	0.241219	0.265877	0.044457	0
ENSG00000004848	ARX	0.028734	0.112156	0.106423	0.401304	0.171833	0.844803	0.896967	0.030094	0	0.065498	0.478908	0.386655	1.18918	1.40186	0.101358	0.145172	0.628299	0.461243	0.646771	0.542372
ENSG00000104763	ASAH1	10.3423	15.719	22.2891	35.2294	23.7009	32.0552	23.4025	16.0323	10.8501	29.7255	45.2899	43.6735	40.6267	26.2231	12.8419	24.4476	27.5325	41.0671	28.1891	30.2546
ENSG00000188611	ASAH2	0.903545	1.12501	1.18038	1.8324	1.65555	0.41135	0.359028	0.855938	1.06677	1.45778	4.19639	3.22454	0.351978	0.363862	0.968891	0.906233	3.38289	3.19532	0.516329	0.3387
ENSG00000204147	ASAH2B	1.83624	2.61226	3.02879	3.96879	3.61988	0.55399	0.780552	2.23037	2.22791	3.29216	7.8195	5.05161	0.683072	0.802859	1.8238	2.48746	6.37243	4.93639	0.760499	0.710377
ENSG00000153317	ASAP1	2.06331	10.8808	2.57433	2.98671	9.81158	4.62911	1.67995	6.09126	2.34225	3.5345	7.39398	9.39881	1.58783	1.10801	1.94092	3.21059	1.99379	3.97947	4.28604	0.20243
ENSG00000151693	ASAP2	4.89078	11.4695	7.42563	6.74056	6.92425	2.46031	2.25898	5.10658	7.33007	13.5805	6.2797	7.31709	2.79062	2.31727	4.95414	6.70931	8.78211	7.79106	3.73505	1.65287
ENSG00000088280	ASAP3	4.76365	6.99562	4.18912	1.80055	2.39469	1.75701	1.72178	6.39576	4.88309	4.56989	1.34555	2.62712	2.20288	1.33453	4.37335	5.167	1.1832	2.5588	1.63019	0.993141
ENSG00000065802	ASB1	1.98235	2.12784	1.79339	1.15008	1.52436	0.866283	0.513211	2.36416	2.07021	1.56189	1.26405	1.15221	0.928211	0.682461	2.06005	2.13034	0.999055	1.59764	0.632563	0.412265
ENSG00000196372	ASB13	2.53866	3.89767	3.70068	3.07625	2.56167	1.28971	1.30584	2.54198	4.72009	4.25108	2.44341	2.57101	1.47437	1.13383	4.61828	4.98261	2.43563	2.79094	1.06692	0.911044
ENSG00000267080	ASB16-AS1	1.59485	2.52311	0.903478	0.616967	0.604404	0.12395	0.594551	1.27801	1.756	1.36119	0.26783	0.458769	0.080144	0.271768	1.67042	2.55609	0.099924	0.695813	0.545394	0.388282
ENSG00000115239	ASB3	15.3548	17.6866	2.36419	12.7419	12.824	0.478201	0.453517	12.0671	14.4193	28.4113	13.2455	21.7947	0.36387	0.509119	7.86031	11.3276	16.7363	14.6675	1.98084	0.212886
ENSG00000148331	ASB6	1.14391	1.02052	0.851872	0.817417	0.708748	0.164285	0.357895	1.43739	1.08572	0.397025	0.111679	0.341877	0.523637	0.230379	0.685259	0.978592	0.258392	0.387094	0.179698	0.171077
ENSG00000183475	ASB7	4.1047	4.81209	3.62528	4.89886	4.49572	1.61958	1.11844	3.76582	4.82628	3.99066	4.0862	4.62136	1.77049	1.7783	4.62881	5.04525	5.26681	5.1119	2.01308	1.03506
ENSG00000177981	ASB8	1.37101	6.31848	7.19387	4.48644	7.0955	1.96043	2.50038	2.82795	7.41217	5.95619	8.0908	7.5418	1.63634	1.54915	1.74666	3.29705	5.49109	7.88873	1.35787	0.512759
ENSG00000138303	ASCC1	12.0368	14.9384	16.5832	10.3768	15.0728	2.72181	3.49703	15.231	20.0251	19.7691	16.7771	17.0647	3.66268	4.67402	13.6663	15.5862	17.0126	15.4407	2.55168	3.1345
ENSG00000100325	ASCC2	2.90835	3.09805	2.93178	1.76753	1.36044	1.71952	1.70851	3.52238	2.19675	5.32423	0.539981	2.39541	1.26214	1.94999	3.36516	1.53421	0.151959	2.88373	0.940248	0.749869
ENSG00000112249	ASCC3	20.2653	23.4442	22.0296	7.28	7.57184	7.89	4.90994	26.2916	29.8229	32.5346	7.61412	11.7512	10.1181	7.0911	21.4169	23.9093	5.47246	5.08679	4.87774	3.40308
ENSG00000139352	ASCL1	0.081993	7.29998	5.98428	6.58176	4.39334	1.88523	1.11463	0	5.4806	7.47383	7.83539	3.43903	1.72262	1.13248	0.077404	6.11847	6.4199	3.67128	1.82401	0.930743
ENSG00000111875	ASF1A	18.5878	23.3629	29.165	23.8165	16.0114	5.32933	5.97124	19.9058	30.5719	30.0651	23.1825	24.4075	7.40251	5.79279	20.5769	25.2602	26.8332	21.5642	8.85258	7.81036
ENSG00000105011	ASF1B	6.58339	9.62131	6.34545	0.337807	1.27044	0.654469	0.504367	8.48805	8.9345	9.01788	0.113436	0.647679	0.605605	0.623466	6.99061	8.43569	0.345	0.930006	0.316999	0.50405
ENSG00000116539	ASH1L	5.51579	6.84627	4.27862	5.93435	6.40768	5.19942	3.04274	4.81365	6.26432	6.64289	6.33244	7.10878	4.06248	3.56242	5.31849	5.7505	6.37573	8.58167	5.61775	3.06343
ENSG00000235919	ASH1L-AS1	1.16679	0.327177	0.525913	1.85041	1.03117	0.105862	0.082061	1.11475	0.763619	0.857815	0.964141	0.675397	0.354771	0.223703	1.67205	0.428452	1.44643	1.22347	0.199705	0.091392
ENSG00000129691	ASH2L	19.5777	13.0166	14.1933	7.3461	8.99435	2.74819	2.72319	23.9473	16.0365	11.7582	12.1999	12.8251	3.88085	2.62371	24.3862	14.1752	10.0005	12.1417	5.11503	2.47528
ENSG00000110881	ASIC1	0.045844	0.521161	0.288991	1.56723	1.50719	0.068187	0.133987	0.04754	0.546731	0.21366	0.830142	0.9359	0.049072	0.057759	0.036552	0.290762	0.577897	0.986217	0.111323	0.042328
ENSG00000108684	ASIC2	0.055139	0.017934	0.159359	1.12271	0.426826	0.162761	0.083189	0.0953	0.087028	0.084207	1.28717	0.395857	0.153648	0.062243	0.069791	0	0.677935	0.466963	0.133296	0
ENSG00000169093	ASMTL	5.59054	1.95934	1.20849	0.413494	1.36132	0.214739	0.197245	7.79386	1.70415	0.878752	0.538044	0.450399	0.313891	0.403793	5.84767	1.39821	0.106427	0.233977	0.324701	0.165457
ENSG00000198356	ASNA1	14.3464	8.64978	10.2193	6.11267	3.49986	1.042	2.07201	18.5795	12.1263	4.82243	3.00442	3.4778	0.905182	0.377303	16.299	6.12581	0.639429	5.0296	1.00699	0.476554
ENSG00000138381	ASNSD1	22.9072	43.61	54.1492	32.0227	28.6759	9.02499	8.94175	34.2985	53.2158	57.8694	50.3657	42.4784	11.5973	8.45883	30.1722	37.5867	52.7118	43.072	9.50731	9.63758
ENSG00000198363	ASPH	18.6521	29.8897	20.5151	8.80332	7.33716	20.2438	8.55208	22.884	24.0913	37.3053	12.9577	16.7192	38.8807	12.8062	20.0125	23.6622	8.14575	12.3849	21.2399	11.304
ENSG00000174939	ASPHD1	0.078552	0.012775	0	0.133647	0.083813	0.020737	0.025253	0.067883	0.006619	0	0.116333	0.142672	0.020521	0.022794	0.058293	0.009823	0.115541	0.07575	0.029882	0.006372
ENSG00000128203	ASPHD2	1.72939	0.982611	1.58401	2.10758	1.66085	0.323909	0.17703	2.25623	1.56663	1.1513	2.04211	1.73643	0.319897	0.215018	2.00824	1.31822	1.26258	2.47451	0.289847	0.1728
ENSG00000066279	ASPM	35.9321	43.6177	41.5018	4.14992	3.57306	7.3511	2.70153	32.7582	40.7427	53.9	2.60281	5.38373	5.81826	3.38006	34.0353	29.5893	5.96754	5.41198	7.73885	3.5293
ENSG00000169696	ASPSCR1	1.25878	0.086772	0.093294	0.098476	0.075184	0.02938	0.803781	0.55094	0.114504	0.01567	0.02978	0.008512	0	0.032911	0.186135	0.059409	0.009914	0.023925	0.008198	0.010943
ENSG00000162174	ASRGL1	1.97435	9.86244	4.68466	5.37405	3.65741	1.06268	0.727908	2.919	4.5138	5.21775	10.2614	9.08578	0.180878	0.303565	2.32436	4.20017	4.97506	15.492	0.210736	0.1415
ENSG00000130707	ASS1	7.63546	0.337585	0.237846	0.518796	0.232861	0.365326	0.761387	14.2601	0.381722	0.256657	0.040722	0.065017	0.762499	0.609779	7.76168	0.517935	0.082294	0.222208	0.490561	0.216995
ENSG00000034533	ASTE1	2.65879	4.30411	3.62714	2.309	1.57076	0.564285	0.542601	2.8175	4.41008	4.61115	2.68517	2.70581	1.06556	0.966109	3.08275	2.46298	1.83909	3.96612	1.25718	0.712012
ENSG00000152092	ASTN1	0.229406	0.553744	0.472568	1.14184	8.82802	0.24308	0.203892	0.188037	0.483089	0.442673	1.03584	1.08011	0.13426	0.170466	0.241414	0.381153	1.00818	1.45982	0.171263	0.108905
ENSG00000148219	ASTN2	0.447522	0.435053	0.432309	0.720726	0.986094	0.179623	0.148691	0.491955	0.339328	0.27671	0.471667	0.691336	0.129756	0.119247	0.374781	0.329516	0.32003	0.641861	0.2443	0.079225
ENSG00000171456	ASXL1	2.47669	4.65509	7.85283	7.37612	5.82577	4.16348	2.59659	1.53852	8.97121	5.86064	3.83372	1.93263	1.14898	1.96563	2.6725	6.17305	1.36944	2.69023	1.30383	0.54979
ENSG00000143970	ASXL2	4.33915	2.4152	1.40337	1.19014	1.0668	1.73361	0.691319	3.37445	1.26573	1.43089	1.07029	1.35261	0.992813	0.886784	5.80991	1.02949	1.15234	1.2621	1.83306	0.704889
ENSG00000141431	ASXL3	0.024524	1.60055	0.799183	3.99486	9.48111	0.444523	0.258284	0.010183	1.44641	0.841217	4.23846	4.62971	0.289675	0.221751	0.028698	5.39498	4.67361	6.95252	0.449645	0.155595
ENSG00000138138	ATAD1	23.9042	25.2936	16.5975	34.814	27.3004	12.0753	8.30305	21.0132	23.3294	20.2377	40.6638	37.4038	11.475	9.16535	25.1304	16.2801	45.1524	33.9757	10.3028	8.32363
ENSG00000156802	ATAD2	9.26345	17.2797	18.4548	1.99191	2.09762	3.42584	2.03021	10.0685	17.866	20.8764	2.03294	2.70051	3.99071	2.09963	12.7014	18.9548	2.76328	2.42664	3.81314	2.043
ENSG00000119778	ATAD2B	5.97294	8.58081	8.84125	10.7672	9.94828	2.98034	1.76698	6.64489	9.01843	6.32573	15.407	15.1065	2.19696	2.03711	5.43983	7.45018	16.1579	15.2171	3.60739	1.92284
ENSG00000197785	ATAD3A	1.45258	0.554784	0.651928	0.189004	0.076188	0.023396	0.043657	1.75393	0.264878	0.144044	0.02955	0.064804	0.107681	0.06615	1.35936	0.106296	0	0	0.028622	0
ENSG00000160072	ATAD3B	1.22907	0.618826	0.644701	0.093678	0.346106	0.040602	0.145581	0.991426	0.699291	0.194381	0.109891	0.061351	0.062969	0.079973	0.894565	0.376671	0.067898	0.114456	0.040072	0.015133
ENSG00000176208	ATAD5	12.875	9.93706	8.67858	1.91307	1.79214	1.81487	1.11128	8.64686	8.71689	10.62	2.29864	3.25467	1.23506	0.758656	9.68488	7.54085	2.90087	2.92207	1.90547	0.472265
ENSG00000137343	ATAT1	1.0208	9.24758	2.29581	21.9085	9.96809	1.60018	0.400662	1.04126	8.82456	2.85498	10.7548	11.4407	0.755561	0.419069	0.501096	4.2548	8.40766	11.9784	0.541768	0.375078
ENSG00000167654	ATCAY	5.97348	1.35736	0.78018	5.69051	13.0072	0.181896	0.302925	5.10705	0.950204	0.695984	3.99102	4.55277	0.227756	0.197499	2.84952	0.8641	1.86353	5.52361	0.178057	0.106464
ENSG00000107669	ATE1	10.937	11.2637	12.4075	9.78158	6.9689	3.73799	8.96203	8.52068	9.86944	18.7856	6.93387	4.45428	3.14073	9.61194	9.1718	8.32885	7.15504	13.7437	3.11378	3.56865
ENSG00000226864	ATE1-AS1	0	0.216415	0	0.164035	0.123623	0.100709	0.09653	0	0.275719	0.337944	0.182905	0.182066	0.153899	0.044111	0.024175	0.364328	0.237716	0.31815	0.118043	0.074935
ENSG00000123268	ATF1	8.0861	9.5955	7.17471	0.685366	0.510128	2.07881	2.43078	12.0147	2.37625	6.55897	0.520806	4.70538	0.480989	3.04339	9.93364	3.01892	0.676764	0.602747	0.630903	1.06695
ENSG00000115966	ATF2	21.5745	30.9	26.3428	30.9867	29.6935	8.28013	7.54547	21.9725	29.5706	33.1291	34.8582	35.9978	9.69998	9.05882	19.7018	24.3984	17.0164	35.3795	11.1095	5.30265
ENSG00000162772	ATF3	2.40984	0.414188	0.468257	0.564864	2.15852	1.51532	4.1817	5.18878	0.33901	0.470717	0.445012	5.60903	2.45479	4.04248	5.44728	0.345591	0.487663	0.692182	0.424029	1.5744
ENSG00000128272	ATF4	79.2463	59.4515	62.7025	49.9141	59.6575	11.0588	15.1576	92.2999	79.9484	53.8297	35.7268	44.8282	18.6463	10.631	88.3927	68.0691	21.2159	40.4623	9.75765	7.07256
ENSG00000169136	ATF5	0.938992	0.52397	0.504937	0.322617	0.781949	0.233092	0.273281	0.618861	0.575523	0.354317	0.284013	0.523845	0.197289	0.165731	0.515064	0.371729	0.339266	0.507246	0.146217	0.177972
ENSG00000118217	ATF6	6.28662	9.47978	10.2013	8.62036	7.13012	5.9364	5.34202	6.45538	9.91077	11.3016	9.56438	10.1546	5.91313	4.67187	6.17248	8.28571	5.92185	11.4026	7.41496	4.78724
ENSG00000213676	ATF6B	1.89238	1.90286	1.36811	1.24562	1.82232	0.855717	0.271443	2.94387	3.4835	1.12247	0.514524	0.750575	0.273858	0.48396	1.55443	1.69772	0.173758	0.853749	0.225478	0.134324
ENSG00000170653	ATF7	1.75508	3.68701	5.04707	1.45679	3.00481	0.914202	0.394028	0.963701	5.95757	1.37871	0.938489	0.82537	0.421991	1.01722	2.21747	1.23269	0.750936	1.5554	1.14958	0.276494
ENSG00000171681	ATF7IP	26.9846	15.596	9.23933	11.7084	12.5834	6.22116	3.95789	23.6397	9.34366	10.3505	30.7385	10.6737	5.43355	3.7149	22.9514	19.2151	28.9006	25.43	1.98466	2.94483
ENSG00000166669	ATF7IP2	5.34984	3.11275	6.14237	3.15179	2.02147	1.95671	0.310568	4.53825	8.55522	6.79503	3.62472	7.03365	0.611627	1.06295	2.0848	5.48712	5.09005	5.0504	0.875765	0.491737
ENSG00000152348	ATG10	3.90576	1.9285	3.84277	0.651276	1.97988	0.161571	0.857207	3.0485	2.39454	2.57508	1.3135	2.64388	0.56361	0.302226	1.70053	2.74527	1.44974	4.77303	0.5845	0.045713
ENSG00000123395	ATG101	3.24081	1.54354	1.21345	0.654496	0.310666	0.203742	0.460598	5.34273	1.95235	0.989724	0.370915	0.587247	0.756505	0.196803	3.03983	1.08377	0.161408	0.365118	0.188687	0.283156
ENSG00000145782	ATG12	15.6898	21.9325	22.6249	22.2656	16.5557	7.23015	6.95256	18.0235	28.2056	25.6583	23.0382	23.8235	10.4725	7.49606	12.302	16.9509	20.0876	35.3098	8.04714	6.63412
ENSG00000175224	ATG13	8.47117	9.31433	6.77891	3.74693	2.9799	0.99503	1.22384	10.1764	5.80355	7.55199	4.73749	7.39144	1.30541	1.31853	15.3546	10.9159	2.07566	3.26078	1.90864	0.777777
ENSG00000126775	ATG14	6.14905	4.90849	5.2817	3.42103	3.84273	1.40424	1.21164	6.29023	4.60595	6.03971	4.81755	4.94182	1.39085	1.28465	6.14712	4.5836	5.78906	4.89506	1.87702	1.16441
ENSG00000085978	ATG16L1	6.68222	3.34955	1.47144	2.29751	4.27389	1.42008	1.36755	6.15582	3.4645	2.58892	2.08602	2.34209	2.53629	3.19691	3.51116	2.3404	1.38193	1.68452	1.59995	2.31898
ENSG00000168010	ATG16L2	0.196572	0.155105	0.166161	0.064425	0.080292	0.17549	0.109842	0.594222	0.126648	0.167738	0.05357	0.032025	0.204547	0.132402	0.119614	0.331907	0.080657	0.059918	0.098365	0.06879
ENSG00000110046	ATG2A	0.420673	0.251812	0.191559	0.061292	0.248085	0.086371	0.071769	0.457919	0.252281	0.104653	0.065754	0.040507	0.027183	0.022986	0.377799	0.104831	0.033389	0.090605	0	0.03744
ENSG00000066739	ATG2B	5.23263	3.50018	3.34516	4.26732	4.10625	2.58001	1.35334	4.5305	3.37883	4.34431	5.03458	5.66134	1.97169	1.62499	3.17784	4.37261	6.58968	6.99991	3.35527	1.70563
ENSG00000144848	ATG3	26.8388	21.3441	21.5326	11.2482	14.2012	2.28772	4.97363	23.2466	23.9459	24.1474	15.8381	18.9786	7.85652	5.53628	24.549	24.3617	16.6431	16.0319	9.14166	5.95836
ENSG00000101844	ATG4A	1.4942	4.52157	5.44857	2.86817	4.19316	5.65801	9.01071	2.15817	5.06077	4.04701	5.79656	4.41303	7.40379	7.69231	3.97176	5.28513	3.40242	4.58937	7.97461	8.42585
ENSG00000168397	ATG4B	4.10054	3.31015	6.73957	5.27007	1.80214	0.794325	1.50417	5.40285	5.32599	1.77725	0.771838	6.10209	0.332567	0.496706	4.29855	1.96605	0.505809	1.17325	0.309499	0.349419
ENSG00000125703	ATG4C	7.78272	9.23805	8.83458	2.24998	1.26613	0.875742	2.3301	7.83437	8.31987	12.1219	0.373954	2.99776	3.00793	0.442938	9.72787	6.53188	4.06626	1.28455	2.80694	0.293987
ENSG00000130734	ATG4D	1.34491	0.541868	0.652382	0.520218	0.949299	0.132671	0.04269	1.71044	0.671766	0.30061	0.115877	0.225486	0	0.039706	1.35135	0.453278	0.174757	0.362693	0	0.051031
ENSG00000057663	ATG5	16.1834	18.1014	14.2244	11.32	9.11968	5.09774	1.57772	19.4884	14.6499	18.9033	13.0884	12.3126	6.73522	1.66273	18.0281	16.7491	10.6403	11.4664	8.1984	1.94098
ENSG00000197548	ATG7	1.87759	3.29357	3.21727	1.09242	1.93233	1.07439	0.472696	2.19916	2.51301	2.63087	0.363478	0.833634	0.435793	0.495866	2.07877	2.13838	0.862699	0.668826	0.755458	0.365751
ENSG00000198925	ATG9A	2.02189	1.86062	1.60921	1.03241	1.57253	0.635854	0.793291	3.95175	1.35668	1.20129	0.560071	0.694082	0.65617	0.576891	3.69944	1.9056	0.392007	0.746635	0.409009	0.255206
ENSG00000138363	ATIC	11.7645	7.93438	5.88207	3.37814	3.64285	2.56303	2.91147	14.3333	10.8758	5.44794	3.11192	2.91665	1.66076	1.38227	14.6912	7.36421	2.97573	3.81439	2.21093	0.652724
ENSG00000198513	ATL1	0.528456	5.11742	1.32497	25.1163	22.2742	1.32969	0.21664	1.62798	3.99152	1.41576	34.0146	27.6128	0.294826	0.18326	0.508435	1.87352	37.0657	34.6501	1.91377	0.723067
ENSG00000119787	ATL2	33.4301	33.4776	33.8953	26.5644	17.2683	5.0474	6.88765	63.1461	38.0637	34.6407	34.6653	36.4005	5.29742	8.3606	48.6957	6.25654	35.8345	26.523	11.2515	4.57665
ENSG00000184743	ATL3	9.1701	3.30354	3.04303	2.05675	2.47644	4.86261	3.99816	9.22131	2.60397	3.35288	2.30251	2.21119	5.94244	3.45171	7.59326	2.74707	2.469	2.01149	6.19527	3.41975
ENSG00000149311	ATM	22.1735	28.5184	19.8156	17.9933	14.8966	11.931	7.19365	24.1307	28.5344	20.7644	20.5905	16.6323	11.0674	10.7318	17.187	20.191	21.1891	13.1199	17.5125	7.05604
ENSG00000166454	ATMIN	22.8104	23.9443	20.1767	17.6772	16.3222	4.33186	5.16181	22.492	25.2965	31.2606	19.9816	21.3031	8.2923	5.37974	22.3932	25.7854	21.8169	22.9698	4.84687	4.72857
ENSG00000111676	ATN1	0.790825	0.645333	0.480574	0.296288	0.626107	0.935692	0.271606	0.587604	0.310241	0.182462	0.154251	0.195812	0.192092	0.193713	0.624624	0.267097	0.153542	0.263018	0.2219	0.150279
ENSG00000168874	ATOH8	0.014145	0.114422	0.113073	0.013162	0.045733	0.595343	0.049771	0.005006	0.151409	0.082719	0.031031	0.01516	0.081269	0.059214	0.004559	0.096744	0.006228	0.009777	0.092467	0.052426
ENSG00000177556	ATOX1	9.65174	3.6414	4.21557	7.03426	5.91188	1.81588	5.07389	15.9337	6.40764	4.47266	0.377143	4.01642	0.461562	0.391793	12.4623	5.56315	0.227711	4.42234	0.412007	3.07098
ENSG00000206190	ATP10A	0.102319	0.031194	0.070699	0	0.004409	0.026088	0.006783	0.095001	0.044954	0.064932	0.00458	0.007387	0.007386	0.003108	0.08587	0.060115	0	0	0.019688	0.003954
ENSG00000118322	ATP10B	0.026715	0.078205	0.03309	0.045481	0	0.104462	0.097107	0.036938	0.071048	0.050998	0.011425	0.110382	0.092685	0.086051	0	0.08983	0.022974	0.041219	0.179431	0.020126
ENSG00000145246	ATP10D	0.925839	3.01526	2.2797	0.74055	0.700879	2.21064	1.48115	1.41261	2.90456	2.92908	0.849419	1.4101	2.31578	1.55096	0.829498	3.20569	0.647309	0.864871	2.42586	1.12402
ENSG00000068650	ATP11A	5.51868	1.35179	1.30209	0.922972	1.64769	1.33929	0.490577	3.65616	1.0357	0.84765	0.645402	0.578058	0.526746	1.12874	1.67809	0.587335	1.21555	1.13027	1.52227	0.472358
ENSG00000058063	ATP11B	9.07395	12.0068	9.60998	6.46097	8.71817	5.39541	3.05576	8.17671	14.385	16.3412	14.3421	9.96353	8.686	5.1457	6.28185	7.94413	12.0935	11.2453	7.55451	4.35815
ENSG00000101974	ATP11C	28.9126	23.2458	14.0545	38.2361	21.9248	11.0005	17.0234	19.2252	23.6185	25.3488	45.2641	40.4375	14.533	17.177	18.5649	13.1635	38.7465	34.7286	13.0737	15.6139
ENSG00000075673	ATP12A	0.228835	0.044972	0.14314	0.143812	0.227698	0.709555	0.553291	0.259656	0	0	0.207695	0.360738	1.24809	0.532654	0.337914	0.116613	0.208819	0.183878	0.931366	0.454222
ENSG00000105726	ATP13A1	2.58836	3.07618	2.91898	2.05755	3.48155	1.58637	2.00732	3.26813	2.54458	2.06808	1.43188	1.44907	1.22016	1.53902	3.45825	0.196107	0	1.95358	0.072025	0.732577
ENSG00000159363	ATP13A2	2.30856	0.982204	1.00077	0.655909	1.0994	0.481262	0.420093	2.49744	0.737111	0.653807	0.388798	0.691968	0.241918	0.17941	1.77684	0.194934	0.049272	0.44605	0.066416	0.021911
ENSG00000133657	ATP13A3	28.8916	24.1428	14.4051	15.5407	11.3048	10.7677	15.9868	15.6828	13.228	19.2542	17.4888	23.4117	15.4304	10.7945	35.606	11.7386	16.6021	12.7267	17.0136	10.9762
ENSG00000127249	ATP13A4	0	0.13322	0.105953	0.214644	0.189757	0.35219	0.065182	0.020903	0.072615	0.136293	0.241448	0.220519	0.220898	0.100532	0.049794	0.144053	0.286019	0.435343	0.244535	0.173038
ENSG00000163399	ATP1A1	41.6218	26.4851	19.4349	18.5983	15.7584	22.0848	17.7506	53.2775	27.965	20.847	3.47598	12.6185	24.8274	16.4901	57.5031	5.9397	2.794	16.5834	5.04893	3.55537
ENSG00000203865	ATP1A1-AS1	0.048015	0.220279	0.168579	0.147729	0.133367	0.210864	0.048852	0.064984	0.164404	0.194213	0.047946	0.071637	0.127178	0.071975	0.095239	0.172421	0.07362	0.072515	0.151863	0.043307
ENSG00000018625	ATP1A2	4.81442	4.17546	3.39792	0.07707	0.257431	1.0017	1.29809	5.79287	4.92932	5.49507	0.03853	0.140756	0.957524	1.20046	5.14646	4.2319	0.074972	0.244127	0.887216	0.763489
ENSG00000105409	ATP1A3	0.946382	0.37174	0.168878	3.50601	6.70225	0.691112	0.087291	0.650741	1.0355	0.059428	2.00018	1.40848	0.276366	0.811301	0.733346	0.743324	0.832805	1.83553	0.015413	0.455875
ENSG00000143153	ATP1B1	25.0623	31.624	34.4753	52.1614	37.4951	29.9598	29.2036	26.1377	32.2061	38.9342	56.8897	55.6372	40.9796	30.5099	23.0588	29.2051	57.9909	54.957	42.7117	28.8598
ENSG00000129244	ATP1B2	0.701956	0.146009	0.180863	0.048916	0.298943	0.739641	0.55102	0.571979	0.099193	0.126307	0.122946	0.099642	0.138875	0.378483	0.775261	0.048028	0	0.256098	0.347043	0.257825
ENSG00000069849	ATP1B3	76.9122	55.3573	55.1375	26.5534	22.8847	18.1208	13.2352	76.1623	59.5139	62.0617	35.2906	37.5173	23.0481	19.1517	84.7132	53.1443	33.9215	38.8125	18.0613	15.4127
ENSG00000166896	ATP23	1.24273	3.97647	5.44827	0.557371	0.295428	0.597771	0.504852	3.63595	5.66928	6.63106	0.651804	2.27555	1.72598	0.594953	3.14528	1.57377	0.997538	0.567511	0.515758	0.558037
ENSG00000260442	ATP2A1-AS1	3.00839	3.47347	2.38248	0.451709	0.653816	0.186327	0.340352	4.32296	4.69504	1.60481	0.226389	1.08634	0.737534	0.465442	2.31615	5.01329	0.676081	1.12202	0.196716	0
ENSG00000174437	ATP2A2	47.4799	35.3185	33.0411	29.5677	30.5621	17.8725	12.225	48.9911	30.8567	36.096	28.1228	36.1637	19.4923	14.8905	48.8327	33.5833	14.4185	39.634	15.9639	12.1005
ENSG00000074370	ATP2A3	0.393922	0.057962	0.109264	0.092676	0.054386	0.105634	0.043038	1.26766	0.045119	0.034018	0.038295	0.045633	0.21663	0.026244	0.200643	0.024883	0	0.05181	0.051315	0
ENSG00000070961	ATP2B1	15.7009	32.5156	29.6234	32.5505	25.5956	9.44917	8.75103	13.7068	29.2772	37.6563	40.7289	33.7416	9.87089	10.0001	13.1438	28.5566	39.6702	33.4948	9.31801	9.81236
ENSG00000271614	ATP2B1-AS1	0	0.563973	0.560619	1.11237	0.62519	0.209362	0.245575	0.058744	0.34166	0.352354	1.15674	0.706544	0.116922	0.221175	0.165419	0.425973	1.12611	1.17635	0.268566	0.255103
ENSG00000157087	ATP2B2	0.014729	0.007186	0.018244	0.1021	0.053944	0.279566	0.353147	0.022759	0.014892	0.01687	0.047241	0.053451	0.099277	0.390109	0.021505	0	0.047497	0.050202	0.209399	0.155891
ENSG00000058668	ATP2B4	14.7548	7.10319	7.77901	5.33711	5.36568	9.46832	5.7599	15.1888	5.98633	7.04874	4.89344	5.17953	9.10474	5.43144	14.9974	6.43944	4.75235	5.97721	10.1392	5.31308
ENSG00000017260	ATP2C1	18.6046	14.3503	14.4485	19.4847	17.069	8.4577	3.62294	21.3324	16.6719	17.0413	23.4369	28.7726	9.49239	5.20537	21.4798	20.4491	24.5498	27.6158	7.53026	2.69168
ENSG00000152234	ATP5A1	180.374	87.309	180.403	120.075	125.663	23.12	23.6063	217.202	167.543	162.778	124.583	153.757	15.5256	21.3509	216.605	168.555	120.591	140.623	19.073	20.9887
ENSG00000110955	ATP5B	310.065	224.382	265.929	150.626	188.098	41.5108	47.6706	377.901	271.37	305.831	181.732	173.33	66.0704	53.0041	424.961	292.366	123.295	192.704	49.9252	42.8123
ENSG00000165629	ATP5C1	116.259	141.329	145.622	111.365	86.4575	33.4127	37.0419	140.907	172.205	164.775	118.941	124.178	52.9461	40.8879	140.755	180.542	125.289	118.6	49.2482	39.6101
ENSG00000124172	ATP5E	16.7812	39.4476	41.0486	32.6704	28.9666	8.68505	10.8034	19.461	45.9751	45.0548	44.897	41.9241	16.6951	10.6767	20.277	52.6191	46.9125	39.5852	13.4926	13.505
ENSG00000116459	ATP5F1	109.409	153.077	63.5468	55.1296	91.4609	13.2473	12.4903	156.697	168.079	144.446	56.8388	62.9218	20.1293	34.2632	149.449	77.9529	51.4017	151.042	49.6354	41.175
ENSG00000159199	ATP5G1	34.0438	20.5001	15.4864	15.0869	11.7154	2.06074	4.84947	50.0012	28.8495	21.6429	8.97296	12.2596	4.21794	6.20185	26.1549	22.8681	4.86195	10.5731	1.27234	2.8906
ENSG00000135390	ATP5G2	68.1078	89.0686	53.3559	30.7387	27.1041	9.79785	7.90398	109.632	72.8604	44.7062	5.19243	17.8875	12.0314	9.69371	55.2177	58.7561	3.6103	12.2135	2.16328	1.40505
ENSG00000154518	ATP5G3	37.2383	30.7151	114.377	60.8779	54.0798	29.0596	11.65	27.9635	129.733	27.8167	70.735	75.1279	45.3928	37.742	41.9004	127.922	68.8317	78.4901	40.281	35.3772
ENSG00000167863	ATP5H	216.236	118.665	122.604	73.9518	62.5566	31.6518	31.3239	261.172	141.888	132.984	74.7048	96.9708	50.9099	32.4012	242.576	143.796	16.1865	75.9759	31.105	37.9709
ENSG00000169020	ATP5I	101.848	65.3166	61.5921	29.4539	42.2427	15.5289	16.0281	131.348	71.825	60.1512	33.3098	29.2537	14.8428	18.2245	129.729	82.4669	15.274	28.9623	11.3959	4.69879
ENSG00000154723	ATP5J	46.2604	61.087	60.3231	34.6831	27.7996	19.2216	13.4615	56.3588	75.1571	89.0649	52.765	55.6074	20.1362	13.4156	71.5022	59.3517	55.895	42.0152	10.5363	19.0209
ENSG00000241468	ATP5J2	135.434	91.6188	96.1989	56.6096	58.4438	18.714	25.0796	118.845	64.5204	70.04	32.8101	46.8477	27.7054	19.7683	161.993	105.452	11.3036	40.4371	17.9913	18.5294
ENSG00000167283	ATP5L	42.184	41.6697	41.1754	32.0344	29.1097	12.0464	13.3462	51.8041	53.0852	48.6141	36.7527	34.249	15.7278	13.6492	46.209	38.2836	41.8843	28.9355	12.268	14.7043
ENSG00000241837	ATP5O	88.5911	40.0784	104.577	51.8591	58.2418	25.9031	19.9209	93.4597	92.8074	121.649	104.357	91.0126	23.677	19.3616	136.145	148.724	30.3899	70.8555	8.75666	8.15135
ENSG00000125375	ATP5S	2.22145	2.93305	2.7396	1.91863	2.41174	0.451371	0.634594	4.56931	4.74348	3.08887	3.60249	3.13775	0.29574	0.4796	1.69751	1.76253	3.41722	3.50495	1.03408	0.220975
ENSG00000198899	ATP6	171.344	136.595	147.197	264.23	244.525	474.359	827.129	209.125	154.31	121.226	225.344	228.08	491.129	956.286	307.827	171.714	257.997	233.349	526.553	1002.08
ENSG00000071553	ATP6AP1	3.2444	3.42581	2.20852	3.77873	4.0339	1.3486	1.32221	3.9619	3.21486	2.55795	2.9044	3.35984	1.45199	1.21021	5.6043	2.68417	2.02969	3.03898	1.18893	1.00934
ENSG00000205464	ATP6AP1L	0.067902	0.411521	0.400331	0.249852	0.308503	0.318543	0.282728	0.114662	0.405327	0.491154	0.37521	0.416264	0.194791	0.241307	0.08493	0.510151	0.539164	0.503109	0.328813	0.272966
ENSG00000182220	ATP6AP2	30.1074	28.6669	24.9511	32.7458	17.3945	22.0786	19.6408	34.959	31.4747	27.7457	6.72458	35.5752	4.66325	20.0607	28.9397	26.3671	27.1666	6.38998	23.7705	20.9878
ENSG00000033627	ATP6V0A1	3.67735	3.75789	3.37322	6.28862	5.93748	4.75017	2.07487	4.29869	4.66288	3.53298	6.78353	6.36206	2.67275	3.44068	4.44091	3.98331	7.01412	6.56766	6.2468	1.80111
ENSG00000185344	ATP6V0A2	7.87983	7.79404	6.90522	1.56175	3.1186	2.13067	0.733805	10.5454	8.77346	10.2382	1.98939	2.1071	1.84583	1.69494	7.08585	10.9452	4.60007	2.18772	1.49656	1.03877
ENSG00000117410	ATP6V0B	7.77137	11.5047	8.5843	9.51742	11.3477	1.15708	1.55284	15.917	12.2297	5.67061	3.74678	7.13175	2.48866	1.00973	15.4749	9.33822	1.22429	7.83434	0.440198	0.607883
ENSG00000159720	ATP6V0D1	8.32265	5.7286	3.95499	6.9312	9.78984	0.747392	3.31431	9.74732	6.623	0.657494	2.81074	3.35681	1.7486	1.00694	9.28089	1.26998	0.485767	3.30515	0.203162	0.180383
ENSG00000113732	ATP6V0E1	28.379	22.0996	27.2035	8.14101	8.5229	10.8366	12.9765	35.4717	24.2979	27.66	13.5225	12.7127	21.0208	13.4984	36.0504	30.0196	12.1301	13.4414	16.909	14.7737
ENSG00000171130	ATP6V0E2	1.61082	6.23368	2.60536	3.86899	10.3091	0.394529	0.454925	0.933024	3.29884	1.84922	2.37468	2.71532	0.598269	0.453592	0.739498	2.04768	1.41269	2.85428	0.208845	0.14158
ENSG00000204934	ATP6V0E2-AS1	0.152886	1.37613	1.11207	0.538353	0.746927	0.105886	0.089843	0.089222	1.35992	0.788361	0.480462	0.721505	0.163318	0.13089	0.209973	0.958985	0.177255	0.383563	0.109313	0.067849
ENSG00000114573	ATP6V1A	50.0226	32.4209	25.948	63.4044	60.0966	13.5119	13.3746	39.4235	26.178	34.9558	81.6438	76.5329	18.5018	14.199	41.6234	14.9948	82.6948	77.6876	24.9324	13.3575
ENSG00000147416	ATP6V1B2	18.8607	20.2381	19.757	11.6343	27.7105	8.86515	2.98542	22.5047	24.9669	21.4039	38.1302	38.8867	10.0047	3.10667	22.6676	26.9741	14.9081	41.0984	9.26319	3.11886
ENSG00000155097	ATP6V1C1	28.2173	19.0867	16.2983	24.1143	24.8253	10.1315	9.74464	34.1372	16.2878	23.3051	34.1495	30.9677	11.3069	9.31248	25.982	14.8967	36.8276	39.3017	16.1667	10.3514
ENSG00000100554	ATP6V1D	33.4982	20.2052	21.2795	28.8935	21.208	7.10581	7.96907	34.4034	15.9005	32.264	27.6668	30.5779	8.58441	10.8027	38.287	23.7291	32.4832	30.2058	9.79347	5.063
ENSG00000131100	ATP6V1E1	42.6905	24.86	26.3514	31.0641	28.4937	14.1607	18.4806	53.8959	30.4502	27.843	31.6498	33.3868	18.6617	13.6306	51.4185	26.6712	26.9511	33.6052	14.2965	14.09
ENSG00000250565	ATP6V1E2	0.162927	0.154982	0.78091	0.139658	0.433709	0.1554	0.076705	0.144478	0.092649	0.14722	0.107609	0.736456	0.455328	0.05999	0.973638	0.2994	1.46871	0.323676	0.104505	0.036347
ENSG00000128524	ATP6V1F	12.613	15.6253	16.5527	15.5727	14.1682	5.70393	6.88505	16.7681	18.3091	11.3481	9.70345	11.312	6.91606	4.92597	14.5659	16.9042	3.14425	12.013	4.59844	5.05219
ENSG00000136888	ATP6V1G1	72.9522	86.5185	81.9621	103.591	83.3088	24.749	27.8778	77.433	80.47	92.4258	95.4707	99.6847	34.1874	19.5903	70.4685	69.6317	94.3335	86.2694	29.3604	25.7161
ENSG00000213760	ATP6V1G2	0.565475	1.80729	1.83858	11.5008	10.7589	0.443839	0.706095	1.44327	2.69813	1.97511	14.4324	12.4423	0.543806	0.334945	1.31214	1.84944	13.6846	11.7505	0.851855	0.315218
ENSG00000047249	ATP6V1H	22.6597	14.4454	8.86692	16.9631	20.3019	5.76848	6.29365	20.9427	15.7051	20.2051	29.9901	35.9951	9.53644	4.98042	21.7347	8.55568	18.2345	15.5844	5.11674	3.53527
ENSG00000165240	ATP7A	1.11322	3.93542	3.79262	3.68226	3.86877	2.80289	1.90258	0.962721	3.15551	3.76376	4.14978	4.30262	2.81777	1.91464	0.863441	3.58289	5.06138	4.89437	3.64897	2.37833
ENSG00000123191	ATP7B	1.60022	2.26375	2.05819	1.34488	1.48031	1.01211	0.975492	0.963496	1.54321	1.31436	0.452394	1.14965	0.885479	0.615617	1.22648	1.18924	0.618139	1.41956	0.675073	0.306935
ENSG00000228253	ATP8	125.551	122.516	134.418	213.875	201.387	232.151	402.831	137.097	118.89	114.484	208.15	181.181	229.105	638.725	192.999	171.738	256.486	195.751	230.966	484.763
ENSG00000124406	ATP8A1	5.90863	9.12624	4.14034	11.0149	9.65102	2.49754	1.03963	6.0615	6.43892	9.16311	32.0918	27.3897	2.62543	1.48015	4.53457	4.36303	31.5931	28.9798	2.30539	0.855705
ENSG00000132932	ATP8A2	1.68413	0.324602	0.219795	7.46823	7.07517	0.292588	0.206164	1.50359	0.292324	0.305759	8.021	8.14154	0.320287	0.209332	1.20761	0.311736	6.73695	9.09397	0.453219	0.194367
ENSG00000081923	ATP8B1	0.767412	1.15505	1.49418	1.09436	0.702756	2.0169	0.795056	2.03557	0.680547	0.527263	0.400363	1.00105	2.2997	1.28671	0.75959	0.555411	1.21161	1.362	1.98589	1.34651
ENSG00000143515	ATP8B2	6.11833	4.06501	3.02028	6.08376	3.24452	1.54563	1.5526	5.70826	3.12252	3.23271	2.39655	2.57064	1.1622	1.01137	5.34808	3.28913	1.45786	2.79383	0.788109	0.766243
ENSG00000130270	ATP8B3	0.26552	0.154784	0.143409	0	0	0.04025	0.039109	0.324533	0.087217	0.066142	0	0	0.075466	0.023686	0.219123	0.218868	0.018485	0.050076	0.051291	0.016193
ENSG00000104043	ATP8B4	0.029132	0.0211	0.013458	0.012707	0.049268	0.31982	0.075026	0.021675	0.014709	0.008352	0.049002	0.060077	0.235006	0.109155	0.028321	0.006141	0.042048	0.021095	3.04679	0.114751
ENSG00000054793	ATP9A	2.60974	6.83407	4.91226	25.6535	23.1354	2.93583	1.65138	2.45615	6.0998	5.48678	24.6267	22.8181	2.49308	1.58716	2.6011	4.37819	23.4318	30.083	3.03655	1.07527
ENSG00000166377	ATP9B	1.80906	3.22526	3.59928	3.2109	2.93598	3.61872	1.35432	3.59339	4.63479	6.26581	4.0695	2.49456	2.13517	1.50162	3.15402	3.65227	2.35662	5.46798	1.63877	1.53335
ENSG00000123472	ATPAF1	23.6801	18.2153	18.601	23.7536	33.7491	4.3239	6.18446	21.4326	18.8014	24.6648	37.6819	30.0905	7.08674	4.61418	34.8247	23.2141	31.9326	38.6843	5.80814	5.20878
ENSG00000171953	ATPAF2	0.619958	0.478552	0.807339	0.354383	0.500268	0.203843	0.090146	0.475148	0.556829	0.499327	0.38039	0.359799	0.136689	0.602668	0.824856	0.372556	0.351615	0.435367	0.165299	0.096683
ENSG00000130770	ATPIF1	62.4073	52.1722	19.0749	12.2612	34.6606	3.40255	5.36314	97.1744	18.635	20.0994	15.0776	17.9588	8.1878	6.80982	102.025	18.6825	19.1491	13.7117	6.41425	7.25398
ENSG00000175054	ATR	10.2406	6.25955	5.77663	3.20679	4.12485	3.20972	2.02826	5.97431	7.82036	8.82606	3.74077	4.69213	3.08644	3.41069	5.99213	6.71918	5.48178	4.86836	3.81665	2.34068
ENSG00000138085	ATRAID	32.4107	29.4236	30.4414	11.9496	18.6637	13.7645	17.6244	44.9937	44.36	31.4606	6.80851	12.8192	22.269	15.7218	47.6307	37.9911	4.36903	11.2509	13.514	11.9369
ENSG00000088812	ATRN	6.68875	8.31696	6.29169	10.0745	8.72114	3.75687	3.17242	7.88255	7.58544	7.67394	9.83169	11.3799	4.07632	2.98112	5.69833	7.03709	8.43443	11.5758	4.66639	2.74614
ENSG00000107518	ATRNL1	0.676376	5.07801	7.521	21.4155	8.57193	2.94333	7.56756	1.0041	10.7179	7.88951	15.4508	22.9948	6.84372	7.22302	3.79845	3.36268	20.7619	18.4169	8.87196	3.15197
ENSG00000085224	ATRX	23.2592	25.8144	10.6753	26.7347	19.5529	15.2719	4.96382	20.8514	22.2266	14.8415	29.295	31.2598	8.35942	4.27286	20.3461	15.6324	41.3728	33.4282	16.4953	4.91574
ENSG00000124788	ATXN1	0.310717	0.034206	0.037852	1.0594	0.181474	5.83605	2.5646	0.068994	0.528822	0.033874	0.418642	0.154959	4.84103	3.54687	0.06287	0.308146	0.173456	0.136007	1.50097	0.269557
ENSG00000130638	ATXN10	22.7467	34.1752	36.1532	25.6141	28.5451	9.16494	11.2552	34.3538	42.7511	37.5334	29.3304	30.1032	2.66507	9.38655	4.32787	44.8756	2.56216	32.3496	1.59769	0.537815
ENSG00000224470	ATXN1L	4.70854	4.47057	3.3299	2.48865	2.42337	1.66857	1.30406	5.06359	3.2429	3.19071	1.52526	2.18066	1.67911	1.18334	4.9404	4.41721	1.7013	2.52655	1.81803	0.795387
ENSG00000204842	ATXN2	8.70532	5.71723	7.94198	6.73975	6.53447	5.00458	3.29759	6.79262	5.10663	8.0901	6.94832	7.2694	3.65216	6.44292	6.95913	4.48701	8.557	4.14851	3.28631	2.94608
ENSG00000168488	ATXN2L	4.2164	2.41338	3.38766	1.79441	2.36902	1.48027	1.38037	4.05556	4.26042	1.37639	0.812841	2.25663	1.4684	1.96542	3.86335	2.12439	0.713505	1.56435	0.954875	0.462656
ENSG00000066427	ATXN3	1.57159	10.7534	7.2083	6.95284	4.45367	5.87258	0.49115	3.46898	7.36256	1.92712	2.74165	7.28562	0.500751	0.489463	6.65029	2.9179	7.33432	21.8502	5.25141	2.44507
ENSG00000163635	ATXN7	2.60065	1.49207	0.588695	2.04577	1.99312	0.971057	1.04526	3.27047	1.90643	1.84022	1.51989	1.72819	1.72023	1.14663	3.85774	2.08967	1.41324	1.04886	1.39013	1.01882
ENSG00000146776	ATXN7L1	0.319361	0.539617	0.134994	0.096589	0.105656	0.255313	0.059843	1.39293	0.476335	0.119707	0.080262	0.091916	0.087388	0.093535	1.31991	0.114183	0.090992	0.645005	0.187961	0.034507
ENSG00000162650	ATXN7L2	0.385839	0.576333	0.407019	0.199839	0.53078	0.136909	0.065337	0.26466	0.53163	0.328661	0.249516	0.232991	0.080149	0.017117	0.278743	0.392416	0.025112	0.214008	0.09714	0.022218
ENSG00000087152	ATXN7L3	10.0574	7.68746	7.00646	7.19383	8.74268	2.09764	2.03758	10.0214	6.69899	4.96731	5.61878	6.03876	2.42757	0.871476	10.3849	5.02134	3.26273	4.76543	1.86069	0.742588
ENSG00000253719	ATXN7L3B	15.3955	25.6191	21.218	30.6197	28.3789	5.38586	5.94632	18.8383	25.6491	25.379	32.7612	33.971	6.51633	5.62052	16.8887	23.44	31.3417	33.6602	6.0691	4.79643
ENSG00000148090	AUH	7.8211	4.33145	5.21778	0.756225	3.62273	2.89088	2.1585	1.03503	6.17112	0.933695	0.736186	4.41909	0.419029	0.407135	6.50255	0.616156	0.881365	0.768274	0.688762	0.292048
ENSG00000127423	AUNIP	8.11131	5.06229	4.83147	0.784945	0.628479	0.51923	0.206006	7.66571	8.0433	5.08999	0.109079	0.83192	0.402212	0.21831	9.2883	4.3593	0.985388	0.93487	0.253175	0
ENSG00000115307	AUP1	10.2962	6.48179	5.88377	3.64282	6.26968	2.51751	2.16422	12.3766	6.99637	5.5377	1.89576	3.70667	2.34157	2.21838	10.0221	4.77615	0.808566	3.02906	0.8786	0.881296
ENSG00000087586	AURKA	38.7658	25.5003	30.4573	3.07535	2.3188	2.57569	1.75358	36.4755	23.9973	29.854	1.78834	3.49249	4.2394	1.32957	39.1274	24.0482	3.60232	2.9824	2.896	1.86168
ENSG00000175756	AURKAIP1	3.95917	1.17819	1.29837	0.487898	0.910441	0.051498	0.324371	3.08379	1.51494	0.506571	0.217197	0.23315	0.172211	0.145398	2.58468	0.378539	0	0.261411	0	0
ENSG00000178999	AURKB	17.8036	11.9114	10.1506	0.290874	0.346919	0.387786	0.220042	26.9126	10.6722	6.47926	0.113709	0.378549	0.56469	0.481144	19.3769	7.17746	0.05042	0.370785	0.320523	0.04571
ENSG00000158321	AUTS2	4.86646	1.14305	0.578745	0.420085	2.17503	0.501743	0.260586	1.99379	0.234771	0.489618	0.939401	0.947467	0.111766	0.772338	3.1249	0.200256	0.272902	1.10329	0.371264	0.041607
ENSG00000169857	AVEN	7.4791	6.30563	6.6323	1.5914	2.40363	0.929788	1.03935	7.71718	5.97403	4.71798	1.67467	2.04026	1.41987	0.599347	8.94212	6.7722	2.5851	2.16559	0.874029	0.57676
ENSG00000105778	AVL9	9.25166	8.33534	6.98462	14.0249	8.44754	2.43135	2.65272	9.51444	6.48223	4.48376	8.92474	8.06747	2.43038	2.57504	8.73728	5.54972	16.6687	8.80773	3.76236	2.05948
ENSG00000119986	AVPI1	1.26808	0.335607	0.262358	0.254117	0.261616	0.298226	0.473958	1.2476	0.913179	0.395536	0.362346	0.146833	0.810836	0.491724	1.36567	0.579198	0.091077	0.245109	0.569223	0
ENSG00000166148	AVPR1A	0.034332	0.365011	0.298942	0.214914	0.127847	1.03351	1.40748	0	0.172525	0.367995	0.22112	0.106743	1.60411	1.01195	0.016626	0.435494	0.221656	0.255965	1.28617	1.3409
ENSG00000103126	AXIN1	1.31087	0.958418	0.798358	0.227585	0.667395	0.146526	0.315013	1.14016	0.936888	0.495961	0.228822	0.27089	0.126518	0.117222	1.10517	0.679034	0.088444	0.331216	0.016285	0.124213
ENSG00000168646	AXIN2	12.3305	12.6902	14.4958	2.04542	2.01223	1.56402	1.63239	9.62261	12.1158	13.0784	1.91461	2.56365	1.59175	2.72376	4.37202	11.5956	1.86946	2.42119	1.63649	1.28787
ENSG00000167601	AXL	3.60014	1.18206	0.965284	0.194396	0.325744	0.59107	0.689566	4.37627	0.807459	1.16247	0.282282	0.328484	0.734493	0.684749	3.49864	0.624804	0.198582	0.215109	0.637723	0.456841
ENSG00000163512	AZI2	7.89383	13.5588	21.5434	11.5803	13.4794	5.62555	2.916	11.6981	16.8254	20.3807	20.9307	19.2436	6.93502	5.89335	6.96741	21.3715	14.9236	15.63	3.87021	5.27173
ENSG00000155096	AZIN1	105.997	73.561	76.8255	82.4474	66.7676	13.3924	20.098	117.183	69.1381	88.5024	125.462	97.0759	23.7483	19.5458	119.072	62.3798	114.423	99.337	23.8099	25.366
ENSG00000166710	B2M	48.4129	34.5567	53.7469	10.9015	8.53283	98.4471	100.003	51.0325	35.4798	43.2122	4.8697	11.6672	147.784	90.3675	45.2646	34.0431	9.98831	10.6901	162.713	84.6098
ENSG00000169255	B3GALNT1	2.58392	17.2823	13.9512	24.4545	15.9938	1.2532	1.27255	4.00199	12.5067	13.5824	24.5177	51.5898	1.98182	0.990681	2.72736	10.7153	30.7997	26.3604	1.48312	0.924795
ENSG00000162885	B3GALNT2	4.88623	4.47063	5.28979	2.61029	2.63598	2.9274	4.03883	4.72519	5.23006	5.28447	1.6779	2.683	4.26157	1.6666	5.326	7.1169	4.30539	2.98676	4.24617	1.99312
ENSG00000172318	B3GALT1	10.0446	3.30331	2.36191	8.39698	7.36649	2.15909	1.84485	9.91797	2.65213	2.72136	9.4694	8.44712	2.23101	2.10474	10.4747	2.43007	10.8899	9.13282	2.23456	2.15734
ENSG00000162630	B3GALT2	0.03142	3.00557	2.4322	4.13805	2.20976	0.462866	0.241225	0	2.46032	2.11903	5.22592	3.45481	0.787345	0.220469	0	2.58594	4.44639	3.24211	0.70169	0.284755
ENSG00000183778	B3GALT5	2.20582	0.050274	0.03827	0.091717	0.09696	0.248877	0.146774	0.867445	0.033083	0.044617	0.066366	0.074274	0.084217	0.146143	0.860847	0.045333	0.103962	0.097129	0.202058	0.093252
ENSG00000184809	B3GALT5-AS1	4.79842	0.059103	0.044311	0.091583	0.087936	0.150922	0.051754	4.85041	0.090428	0.020488	0.045899	0.087658	0.164709	0.122553	4.16456	0.104387	0.092068	0.057384	0.118182	0.06064
ENSG00000176022	B3GALT6	2.0121	4.1705	4.16903	3.58621	2.50513	0.859032	1.03005	2.35358	4.73589	3.7094	2.31945	2.60748	1.26208	0.68013	2.20134	3.46195	2.13897	2.51895	0.863353	0.492801
ENSG00000109956	B3GAT1	0.611143	0.493754	0.577062	0.942504	0.973231	0.062984	0.029346	1.76	0.459032	0.531191	0.678251	0.719228	0.039706	0.032811	0.730968	0.623835	0.547275	0.932624	0.035707	0.025918
ENSG00000112309	B3GAT2	0.233647	0.713945	0.270761	9.10262	7.10546	0.099116	0.073617	0.271576	0.688625	0.840336	13.1885	10.812	0.080573	0.068889	0.434701	0.579755	12.5649	10.4019	0.260016	0.070829
ENSG00000149541	B3GAT3	1.02032	0.880726	0.962283	0.167526	0.930137	0.098339	0.764417	0.728652	0.789739	0.256813	0.10549	0.130859	0.038575	0.212823	0.635461	0.21405	0	0.0966	0.042262	0.20182
ENSG00000187676	B3GLCT	1.80574	6.75375	7.30711	2.28762	1.42128	2.57296	1.66831	2.14823	6.83412	7.5622	2.42316	2.38289	2.34684	1.35276	2.24642	5.37121	3.37955	2.21973	3.47384	2.27873
ENSG00000170340	B3GNT2	8.2886	2.45759	2.1204	1.67866	1.13602	4.90454	1.31313	26.6179	1.78094	2.46678	1.11139	1.38162	1.60688	1.0965	25.156	1.36826	2.04031	1.51487	1.6069	1.21961
ENSG00000176597	B3GNT5	0.725075	16.3417	13.3418	8.83957	1.57254	4.3495	0.600563	4.18597	2.87939	12.5008	2.10673	1.84171	4.03093	4.86911	0.712282	8.70434	2.13163	1.85817	4.21866	0.56298
ENSG00000156966	B3GNT7	4.93866	0.117556	0.089414	0.244156	0.376427	0.203697	0.092443	5.66308	0.095705	0.049007	0.061336	0.14789	0.176095	0.083229	4.71723	0.040255	0.092812	0.194178	0.056097	0.163152
ENSG00000237172	B3GNT9	1.35826	0.437476	0.554017	0.269051	0.217357	0.817802	0.978597	1.5168	0.462827	0.436722	0	0.142325	1.45946	0.859939	1.44142	0.527446	0.045041	0.121215	0.952695	0.548458
ENSG00000175711	B3GNTL1	0.052275	0.055013	0.049038	0.068852	0.037496	0.058771	0.042692	0.050317	0.042787	0.04305	0.01741	0.021505	0.014765	0.049592	0.047003	0.031452	0.027279	0.021747	0.033412	0.010592
ENSG00000135454	B4GALNT1	0.0853	0.135363	0.061163	2.10549	2.23759	0.173231	0.123478	0.132886	0.154798	0.072885	1.52558	1.85668	0.306526	0.073967	0.011769	0.042865	1.15559	1.67648	0.25855	0.101535
ENSG00000139044	B4GALNT3	0.754628	0.342803	0.306459	0.203727	0.208794	0.195019	0.106323	0.869095	0.312877	0.304298	0.10288	0.210391	0.249952	0.140745	0.819559	0.227269	0.065576	0.176012	0.070654	0.056649
ENSG00000182272	B4GALNT4	1.43774	1.51497	1.87004	1.33513	1.50753	0.11067	0.728307	1.45894	1.69981	1.16411	0.604398	0.692587	0.464379	0.310979	1.26202	0.857385	0.37833	0.806014	0.132887	0.154545
ENSG00000086062	B4GALT1	0.448099	0.806458	0.557639	0.350323	0.279743	3.43477	0.372217	0.257871	0.579857	0.72955	0.136754	0.240423	0.584196	0.486483	0.412995	0.668549	0.308631	0.335646	0.913406	0.39982
ENSG00000117411	B4GALT2	3.59205	3.17117	3.02939	1.94258	2.30012	0.309875	0.570818	3.50178	4.32568	1.99602	0.984051	1.15446	0.512944	0.422742	2.71197	2.29152	0.463011	1.1309	0.132831	0
ENSG00000158850	B4GALT3	5.23657	6.98428	3.43056	4.09075	4.26934	1.0664	1.10633	6.14843	5.98049	3.67042	1.72748	2.52462	1.84531	1.3125	4.02718	3.51493	1.26798	2.83234	0.621879	0.891547
ENSG00000121578	B4GALT4	5.83923	1.17212	1.28311	1.00077	1.09694	2.54255	2.33013	22.0347	1.96062	1.82064	0.975958	0.936483	1.8405	2.16809	7.25147	1.50664	0.832613	1.76509	1.49765	1.13876
ENSG00000158470	B4GALT5	23.2864	14.7863	14.5219	13.5962	12.8074	5.91861	5.69327	22.3401	13.6184	14.8	13.3528	13.5271	6.76342	5.35767	22.3658	16.5978	12.8502	16.8626	7.53385	4.29604
ENSG00000118276	B4GALT6	7.50951	14.0718	12.4922	8.69313	6.16401	6.78061	6.05163	5.58846	9.70825	12.8844	7.17818	5.3913	5.68651	3.56094	6.1342	9.55302	7.04191	6.69245	6.56611	2.98383
ENSG00000027847	B4GALT7	0.77048	0.557341	0.687014	0.453912	0.708801	0.129378	0.095498	0.689685	0.419904	0.26945	0.077181	0.118871	0.413092	0.086701	0.666725	0.104787	0.051199	0.048083	0.019111	0.035741
ENSG00000174684	B4GAT1	3.44635	8.59364	8.16183	6.62355	5.36047	3.59722	4.86078	4.81212	8.36215	9.12441	6.34595	6.92955	5.38064	5.37029	3.60061	9.97679	6.06007	5.94829	2.86656	4.39558
ENSG00000108641	B9D1	3.52924	1.30128	1.30115	0.088153	0.121436	0.091628	0.101556	3.26064	0.107581	0.100407	0.032867	0.070576	0.060667	1.0331	4.20346	0.735131	0.053426	0.0848	0.031357	0.057599
ENSG00000164929	BAALC	0.074967	27.9961	1.47636	0.623798	0.587701	1.219	0.574789	0.054132	41.1397	1.38792	1.96008	0.806878	1.34392	9.34689	0.078581	1.25257	0.671803	1.58604	4.40483	0.428209
ENSG00000247081	BAALC-AS1	0.280942	1.05407	1.7986	0.260593	0.021573	0.10548	0.050644	0.030493	0.566957	1.20164	0.024165	0.019663	0.687418	0.0626	0.466992	0.122263	0.030702	0.036824	0.259046	0.974378
ENSG00000136881	BAAT	0.060709	0.14927	0.187243	0.077707	0.018561	0.15138	0.029275	0.062644	0.153453	0.139068	0.2302	0.346883	0.047422	0	0.095075	0.25407	0.637348	0.196495	0	0.068604
ENSG00000105393	BABAM1	26.6204	9.21908	11.6114	12.3353	7.31693	1.63119	3.18697	31.5915	15.5852	8.91782	5.32273	3.20005	3.60741	2.70339	18.4752	16.577	4.53907	2.80113	3.05145	2.03001
ENSG00000158019	BABAM2	8.80863	11.9837	9.77019	4.67083	7.78165	2.12479	4.3132	11.8033	14.4055	16.1732	6.41245	8.70926	5.37193	3.67272	12.2154	17.8863	3.37613	9.76921	4.1728	2.00244
ENSG00000186318	BACE1	1.88891	5.10162	4.01929	7.37137	6.5377	3.55639	1.78631	1.23426	4.4303	4.18568	7.12173	6.47422	4.29595	1.76906	1.75922	3.56405	6.65057	8.15561	3.37282	1.89935
ENSG00000182240	BACE2	2.67229	1.64136	0.539426	0.141567	0.222319	1.57322	1.82511	1.14703	2.00898	2.24563	0.08803	0.129159	1.95002	0.366919	1.61987	2.6935	0.220701	0.219397	0.36106	0.799921
ENSG00000156273	BACH1	16.8166	26.7351	24.0564	17.7388	25.5106	2.38061	4.34561	14.7338	26.6087	21.1484	33.9699	34.4216	8.93333	10.4471	9.10005	28.2608	30.7076	34.3626	6.80924	8.41096
ENSG00000112182	BACH2	0.109353	0.255437	0.194862	1.34518	1.24131	0.381301	0.143875	0.089691	0.182401	0.307469	1.35595	11.7135	0.18381	0.189175	0.088181	1.14089	1.19852	15.0812	0.403549	0.093494
ENSG00000107262	BAG1	10.3226	34.1888	25.6969	23.6235	21.0068	3.38923	0.916355	16.3214	37.0877	36.5632	28.2687	4.32696	1.21688	0.604069	17.1675	43.8148	4.2987	26.5566	0.95962	0.976283
ENSG00000112208	BAG2	2.98481	6.32711	5.75511	1.28056	1.29432	0.565015	0.84539	3.11458	5.91086	6.17797	1.10362	2.12359	1.07904	0.674324	3.53639	5.6839	1.98786	2.20307	1.09885	0.834979
ENSG00000151929	BAG3	0.286515	0.355445	0.368688	0.156819	0.15904	0.193176	0.156366	0.267863	0.31854	0.341375	0.05	0.087475	0.22374	0.175803	0.352253	0.294731	0.126216	0.113449	0.253018	0.138522
ENSG00000156735	BAG4	35.2816	21.4719	17.3139	12.7341	12.3097	5.03083	3.80643	28.0414	14.8123	18.8789	13.772	13.3031	5.01132	3.83728	19.7895	13.9683	16.4064	14.0732	5.08843	4.0144
ENSG00000166170	BAG5	14.5664	17.7313	14.7181	11.8418	10.9889	3.47395	3.44548	15.6755	18.525	20.249	13.8098	14.3271	4.66324	3.58221	14.9922	15.9134	13.7253	15.9956	3.7396	3.25509
ENSG00000204463	BAG6	22.091	31.0717	17.1854	24.2985	31.4516	3.8324	4.82381	36.3804	30.0814	16.1267	10.0058	17.6873	3.6724	3.61665	28.4621	23.046	3.45746	28.5333	2.5082	0.910243
ENSG00000266074	BAHCC1	0.068717	1.6066	1.36728	0.813771	1.02462	0.103059	0.165853	0.079962	1.03491	1.2794	0.514334	0.887054	0.104641	0.091436	0.021855	1.14122	0.723376	1.13654	0.153399	0.028014
ENSG00000140320	BAHD1	2.88385	0.475872	0.280185	0.173609	0.284678	0.168217	0.127473	1.49668	0.478352	0.331293	0.185406	0.173832	0.099592	0.10237	3.05694	0.191773	0.130222	0.198403	0.108217	0.056217
ENSG00000175866	BAIAP2	1.58743	0.341149	0.121321	0.02704	0.561822	0.021532	0.037322	0.095779	0.436165	0.076712	0.031874	0.017829	0.037072	0.012057	1.09291	0.25967	0.021354	0.024884	0.022512	0.294428
ENSG00000226137	BAIAP2-AS1	1.06931	1.98876	1.4191	0.680663	0.764869	0.490333	0.614736	0.645947	2.00782	1.16659	0.597948	0.485275	0.292559	0.338295	0.637684	1.29945	0.194338	0.765994	0.316664	0.100074
ENSG00000006453	BAIAP2L1	4.46013	1.96019	0.96291	0.26264	0.294512	0.393839	2.20108	9.30525	1.53998	1.0984	0.153918	0.748014	0.914883	0.342164	4.64701	1.9305	0.385536	0.53605	0.474704	0.797929
ENSG00000030110	BAK1	4.88799	2.01176	2.57732	0.527489	0.630707	0.42958	0.85152	6.80455	2.62874	1.89176	0.117563	0.606629	1.00657	0.684214	6.77939	1.62993	0.295201	0.322895	0.383668	0.677472
ENSG00000095739	BAMBI	3.67438	4.33451	6.45553	0.936924	1.20581	9.3367	14.2703	5.11984	7.01123	7.69651	0.744311	1.29388	16.7083	12.5452	3.98155	6.30135	1.42741	1.16436	9.3119	9.86596
ENSG00000175334	BANF1	19.1553	26.3735	13.8823	7.45739	6.58935	2.62675	2.15593	27.5243	25.0441	19.019	4.17412	5.83191	3.53346	3.02887	25.824	19.6429	0.797461	5.21843	0.802141	0.694147
ENSG00000172530	BANP	2.45695	0.97161	1.1486	0.484805	1.16083	0.815572	0.445944	1.46664	2.44956	0.968745	0.948008	0.884435	0.525775	0.48758	1.06096	1.08762	2.3869	1.26486	0.30341	0.62923
ENSG00000163930	BAP1	12.9446	7.5669	15.9914	7.7695	17.3759	1.01957	2.4748	15.7281	16.3855	9.2139	6.12631	2.87166	1.20622	1.02394	11.2196	9.98378	2.24765	11.9721	1.43876	0.830485
ENSG00000138376	BARD1	12.1846	26.1514	17.5596	7.24684	7.90972	2.22926	1.55902	10.5102	19.3469	22.4947	8.00311	9.95391	3.1602	2.61937	11.2821	17.8629	13.428	9.83085	2.47445	1.35017
ENSG00000176788	BASP1	41.9368	27.7931	24.083	70.2803	17.6698	8.19839	0.420554	14.5186	22.1746	26.7315	81.1102	11.4838	0.440586	0.396919	33.074	20.9238	2.96267	50.8792	1.05652	0.29204
ENSG00000087088	BAX	6.92291	4.79193	2.80623	1.07622	1.0407	1.11789	1.03469	5.17713	4.7453	2.39621	0.151539	0.49454	0.903676	0.73782	5.41397	2.10263	0	0.675368	0.280619	0.528658
ENSG00000198604	BAZ1A	2.90199	21.3572	19.1292	14.2387	12.0174	1.14549	1.93701	4.38173	17.4996	21.8719	13.95	14.7211	1.53757	0.683372	5.75548	15.5056	5.00158	4.62857	2.3911	1.26074
ENSG00000009954	BAZ1B	25.752	39.5917	33.8025	19.2932	18.7001	8.54623	4.96909	29.2091	34.7002	30.7524	20.0572	24.5847	6.87671	4.79006	31.0053	32.9382	20.3224	28.8787	8.03597	4.77507
ENSG00000076108	BAZ2A	10.104	5.93261	3.48008	4.83043	6.00119	2.27929	1.79882	7.42205	3.64725	4.23195	3.71183	3.3144	1.20878	1.73451	5.53343	3.8268	4.18747	4.04115	2.32864	0.879992
ENSG00000123636	BAZ2B	17.3204	21.9112	21.4012	19.0927	9.39966	10.4093	4.88613	12.2501	16.6683	20.0309	11.5691	22.2795	7.04762	3.91298	10.4019	15.1995	26.0395	22.5424	5.5675	0.950613
ENSG00000105327	BBC3	0.971707	0.576747	1.00665	0.618784	0.576214	0.151418	0.225473	0.480635	0.839514	0.808667	0.075549	0.306147	0.074919	0.210275	0.239014	0.691197	0.075958	0.217022	0	0
ENSG00000214413	BBIP1	7.66432	11.3076	8.52531	17.5201	3.86269	4.1462	4.49624	5.77028	8.02232	9.80443	12.2063	12.2732	4.57473	3.43933	4.43017	3.522	12.7633	11.6281	1.67984	1.19317
ENSG00000119636	BBOF1	0.506513	0.980604	1.31806	1.8422	5.49737	1.48842	3.53948	0.814071	1.74046	1.04852	3.47463	3.77655	1.99835	2.74791	0.093898	1.03992	1.79953	2.34248	1.56617	2.67889
ENSG00000254560	BBOX1-AS1	0.111451	0.078897	1.37276	0.038176	0.050607	0.286893	0.086129	1.36872	0.072908	0.087584	0.044696	0.040995	0.066235	0.081905	1.54733	1.6876	0.040301	0.037939	0.224895	0.031595
ENSG00000174483	BBS1	4.16872	3.96043	3.47851	2.11686	4.03708	1.32224	1.5869	2.73177	2.9136	2.6239	1.88493	2.01776	1.49918	1.69557	1.82007	3.14027	2.30797	1.93614	1.28341	1.73138
ENSG00000179941	BBS10	6.53128	11.0384	12.5883	8.47455	8.1044	3.38516	3.239	6.80593	10.7632	13.1145	12.391	11.4923	3.51238	3.55007	6.43005	8.31849	16.177	11.2191	4.06189	3.8576
ENSG00000181004	BBS12	1.66718	3.45646	3.25347	2.34697	3.04224	0.93921	1.61313	2.1616	3.40579	4.27663	2.92535	3.11294	1.55965	1.74003	1.89878	4.39746	3.69501	4.12445	1.66625	2.01756
ENSG00000125124	BBS2	5.65763	14.1442	13.5746	10.9638	12.1228	8.47397	11.2129	10.9461	20.5949	17.7096	12.8923	14.9364	13.5063	6.8122	5.85915	20.5035	9.25921	13.6463	16.2269	10.5481
ENSG00000140463	BBS4	8.50659	16.3501	9.96421	10.1317	8.69121	1.60109	1.70271	12.8258	24.1327	20.1565	9.54062	5.90015	4.915	5.93294	11.0408	19.4177	7.02433	10.0278	5.79472	1.99917
ENSG00000163093	BBS5	0.480393	1.43818	1.59276	1.42888	1.31601	1.70013	2.00236	0.117075	1.43557	2.10581	1.59269	1.91004	2.06927	2.33014	0.104234	1.16921	1.9487	1.49669	1.72384	2.42233
ENSG00000138686	BBS7	6.09515	10.8308	13.1867	12.9058	10.6518	3.08758	3.10769	10.434	11.1821	16.8072	15.3443	13.9959	3.67612	3.10268	10.541	12.8298	16.7569	14.6428	3.91624	2.74999
ENSG00000122507	BBS9	2.10465	1.92058	5.58131	1.92217	3.48064	1.61209	1.38458	2.19978	5.918	1.63726	3.39839	2.45383	1.21135	2.29398	2.19384	6.11557	2.03971	5.22067	0.713376	0.726785
ENSG00000114439	BBX	13.6184	12.4059	12.8066	2.85522	3.62798	3.92962	3.35156	10.3058	10.7509	10.5358	7.18538	2.85981	1.4293	3.67484	12.3306	13.55	1.91783	7.93004	1.86655	6.25734
ENSG00000187244	BCAM	1.69125	0.471136	0.152569	0.12274	0.382729	0.120312	0.058461	1.59102	0.290298	0.116566	0.02601	0.042372	0.197118	0.08984	0.405123	0.478929	0	0	0.048298	0.046048
ENSG00000075790	BCAP29	8.38779	10.9201	7.98359	3.28764	2.85519	2.3491	2.09597	8.32908	7.02426	7.10214	4.48318	3.36671	2.78464	2.8378	6.99785	6.48336	4.94361	8.17558	3.61012	2.16503
ENSG00000185825	BCAP31	23.3884	11.8708	9.29095	6.85823	10.8813	7.18466	3.46147	32.0151	11.9792	9.29123	8.26358	4.7074	4.83647	4.83788	18.2142	10.6268	8.48553	6.75294	2.28431	1.94193
ENSG00000050820	BCAR1	0.889331	0.777644	0.295967	0.301199	0.186134	0.335107	0.154089	2.05887	0.694165	0.318707	0.1254	0.0305	0.242341	0.134555	0.902519	0.166413	0.005421	0.306886	0.305457	0.022098
ENSG00000137936	BCAR3	0.851041	2.37737	1.3106	0.482213	3.46411	1.29195	0.774465	0.799396	0.623642	0.087479	0.08272	0.914382	0.10882	0.806513	0.752192	1.41082	0.098966	0.580994	0.123927	0.056568
ENSG00000116752	BCAS2	45.448	53.3556	50.0713	46.0425	37.8383	9.7772	9.99467	49.6976	57.737	67.3374	64.3059	51.5765	13.3314	10.7211	44.084	41.8217	70.1069	47.481	11.7622	10.835
ENSG00000141376	BCAS3	2.52119	0.334451	0.367945	2.71657	3.63899	0.407234	0.682065	2.14579	1.50886	0.332788	0.279598	2.41726	0.21245	0.086434	1.87214	0.607427	2.89285	0.237574	0.314482	0.098985
ENSG00000124243	BCAS4	1.23797	0.417571	0.350205	0.475711	0.641774	0.269911	0.548428	1.24368	0.387516	0.325839	0.645836	0.625075	0.335356	0.508971	1.12382	0.502376	0.523946	0.453232	0.221129	0.274576
ENSG00000060982	BCAT1	90.7812	24.1732	28.5441	25.5021	8.04259	1.2369	4.9793	112.718	51.332	142.447	19.7079	8.19465	1.4269	2.82972	76.4284	11.9201	10.4566	6.84085	5.61643	1.76727
ENSG00000105552	BCAT2	1.53055	0.578474	0.544948	0.174014	1.08109	0.137267	0.166661	1.24479	0.774712	0.459469	0.197361	0.327709	0.139295	0.133217	0.960326	0.258306	0.028754	0.154256	0.159828	0.050378
ENSG00000107949	BCCIP	47.3725	38.0019	36.714	17.8078	12.3544	6.54245	7.40655	36.4616	42.8591	43.0313	16.6199	20.9178	7.54003	7.43976	49.6333	32.9757	15.8898	18.7089	7.64609	6.74976
ENSG00000186666	BCDIN3D	0.820014	2.75047	2.76125	2.04631	1.41927	0.596587	0.657859	1.05792	3.30001	2.55609	2.83209	2.71645	0.973357	0.651508	0.967818	2.62977	3.01261	2.28883	1.11571	0.704855
ENSG00000258057	BCDIN3D-AS1	0.122983	0.184305	0.130519	0.87943	0.510428	0.260935	0.207637	0.086301	0.25702	0.251146	1.02764	0.703794	0.092007	0.04795	0.139065	0.198978	0.856971	0.724068	0.193572	0.129669
ENSG00000114200	BCHE	1.53442	12.3704	16.7424	0.285152	0.47367	0.749478	1.48282	0.264257	11.6134	20.6409	0.188266	2.72862	1.14045	1.56974	0.314404	18.004	0.581636	2.46792	2.1872	3.47713
ENSG00000083123	BCKDHB	11.8438	10.7056	9.21625	4.08187	4.84841	2.88279	2.41539	11.0689	10.3086	10.3163	4.15658	5.93638	3.83488	2.83449	12.8311	10.6862	6.3453	4.41281	3.84442	2.04052
ENSG00000103507	BCKDK	2.30193	1.27108	1.10964	0.529129	0.611269	0.423138	0.414636	2.57919	1.2325	0.611566	0.195499	0.349232	0.330822	0.285452	2.08998	0.767271	0.049708	0.419978	0.151648	0.083961
ENSG00000142867	BCL10	8.4063	8.06882	7.14448	6.64863	4.88429	2.87483	2.25591	7.58275	6.68626	7.66582	5.32817	6.83842	2.88165	2.02301	7.22993	6.44199	6.65081	6.80584	4.21776	2.7065
ENSG00000119866	BCL11A	4.7263	0.182638	0.239569	0.837485	0.568181	0.284618	0.078869	3.81018	0.164022	0.479176	1.08066	0.668215	0.12665	0.151598	3.18133	0.248478	1.55998	1.17422	0.343201	0.057564
ENSG00000127152	BCL11B	0.780066	0.262415	0.123988	0.368619	0.24119	0.138293	0.075783	0.600788	0.092688	0.074109	0.250708	0.271547	0.109344	0.112756	0.450211	0.110272	0.202723	0.165952	0.214241	0.133193
ENSG00000171791	BCL2	0.676671	2.04063	1.26588	1.25352	0.959853	2.43579	3.90895	0.516761	1.33941	1.83277	0.844562	1.63404	1.88329	2.51273	0.470475	1.10061	1.55601	1.37994	2.66628	2.32538
ENSG00000171552	BCL2L1	8.75167	8.30509	8.48013	11.3713	10.4383	3.53231	3.79215	11.8155	10.0749	8.15041	6.45978	8.78084	3.85161	2.73526	8.95537	8.46906	4.76926	10.1686	2.31948	1.74529
ENSG00000153094	BCL2L11	0.69642	1.63589	0.543371	0.476654	0.532131	0.405507	0.329496	2.2876	0.637464	0.741602	0.482653	0.539161	0.294671	0.332899	0.622902	0.978564	0.575689	0.553717	0.356123	0.185139
ENSG00000126453	BCL2L12	2.21043	1.49499	0.698076	0.035122	0.134883	0.179931	0.075419	7.28903	1.36326	0.637351	0.103852	0.061628	0.115262	0.104465	7.42647	0.663079	0.106538	0.032069	0.161959	0.120616
ENSG00000099968	BCL2L13	10.6246	9.72847	5.31757	4.03244	3.75607	4.32709	3.15549	9.94318	8.19223	8.26147	1.11828	4.99916	3.7461	3.62118	9.3349	5.52985	0.86541	1.27522	3.26318	2.45382
ENSG00000129473	BCL2L2	2.93913	2.78829	2.46845	1.94359	2.16802	1.95409	1.36713	3.37165	2.72676	2.42848	1.40699	1.63643	1.9986	1.3123	2.8983	3.24514	1.27849	2.00273	1.50334	1.15865
ENSG00000113916	BCL6	1.89684	0.961205	0.300261	0.214769	0.14032	1.68367	1.99643	1.57981	0.300419	0.557801	0.106372	0.189249	1.85257	1.92969	1.27634	0.736824	0.087439	0.608178	1.21376	2.07889
ENSG00000161940	BCL6B	1.68545	0.104628	0.052051	0	0	0.023102	0	1.79638	0.066142	0.275149	0	0	0	0	1.65729	0.110166	0	0	0	0
ENSG00000110987	BCL7A	1.60419	14.3745	9.9488	12.9996	9.58171	0.569958	0.703696	2.96664	9.86912	4.21075	9.6304	11.5822	1.30571	0.544425	1.52104	8.52726	7.98806	14.4018	0.602965	0.335562
ENSG00000106635	BCL7B	2.0483	3.69423	1.97242	3.52481	3.39346	0.257952	1.2219	5.39521	4.44388	2.39535	1.26906	0.86809	0.682073	0.539038	2.08739	2.5942	1.2142	1.33981	1.2966	0.79569
ENSG00000099385	BCL7C	0.063753	3.45461	0.254054	0.170918	0.673706	0.148635	0.04738	0.081824	0.263548	0.186419	0.197753	0.188114	0.081719	0.082149	0.725217	0.164411	0.167315	0.201765	0.11951	0.036615
ENSG00000116128	BCL9	5.10887	2.64093	2.88915	1.76351	2.03546	0.873777	0.456731	4.69685	3.32938	1.85501	1.28476	1.86327	0.487905	0.331203	4.45378	1.72928	1.16697	4.86928	0.557416	0.286286
ENSG00000186174	BCL9L	0.492494	0.071929	0.052099	0.075514	0.08836	0.167643	0.098795	0.527502	0.074445	0.062065	0.027091	0.030564	0.115912	0.101981	0.308294	0.098224	0.026159	0.028788	0.143618	0.056981
ENSG00000029363	BCLAF1	61.4421	81.0733	46.9961	59.2702	35.3513	13.6331	11.875	66.431	71.1616	81.5919	57.6707	63.124	18.4317	15.2841	48.2037	63.0079	103.232	60.8209	14.6648	10.6237
ENSG00000173681	BCLAF3	1.12598	2.0931	1.70026	2.79954	3.78223	0.896816	0.455296	1.21514	2.75399	3.66534	4.1576	3.12934	0.705555	0.604108	1.74562	1.8	5.0387	2.83142	1.07698	0.489863
ENSG00000197580	BCO2	0.025124	1.40524	0.146928	0.574152	0.052635	0.759157	0.123401	0.033309	0.08478	1.06525	0.50798	0.79104	0.425927	0.192401	0.010422	1.82457	0.725002	0.048946	0.134443	0.358557
ENSG00000183337	BCOR	10.0748	0.899345	0.306875	1.11633	1.11089	0.648829	0.230804	9.15807	0.359997	0.397671	0.534618	0.647667	0.887109	0.281521	2.30402	0.393475	0.938182	0.711864	0.273136	0.133606
ENSG00000085185	BCORL1	0.05012	0.156327	0.125531	0.176306	0.226615	0.126041	0.025833	0.072356	0.080584	0.088929	0.110398	0.111023	0.055942	0.055197	0.064985	0.078993	0.098903	0.213788	0.071788	0.018729
ENSG00000186716	BCR	6.38558	0.314675	1.21067	0.692348	1.09019	0.138493	0.068207	6.18165	0.794259	0.231269	0.235468	0.45137	0.096833	0.073009	1.21504	0.303741	0.150011	0.68484	0.110577	0.037963
ENSG00000074582	BCS1L	1.80865	2.05184	4.43435	1.30347	3.88245	1.32787	0.711944	4.9358	3.48724	1.37498	2.63748	1.47414	1.69218	0.576435	2.75721	3.23349	0.712366	1.6828	1.4229	0.794521
ENSG00000236824	BCYRN1	20.3144	25.1695	28.9782	19.2947	7.51027	15.6436	21.2373	18.5842	20.5548	12.8967	8.5398	9.98189	15.4432	21.3052	20.572	26.5774	3.1401	13.6661	7.80465	11.3889
ENSG00000161267	BDH1	0.325002	0.29037	0.214078	0.237886	0.287706	0.050907	0.053444	0.554772	1.24787	0.285873	0.173157	0.134295	0.053003	0.029126	1.41542	0.320694	0.186128	0.115193	0.070382	0.031942
ENSG00000164039	BDH2	18.5442	29.449	23.4101	3.13553	4.23325	7.45637	11.1126	29.0954	36.7036	21.3129	2.6545	5.52206	12.8568	14.7818	24.3131	38.0594	5.45482	7.87448	4.88239	9.71324
ENSG00000168398	BDKRB2	0.086898	0.072888	0.092705	0.019046	0.036573	1.27335	1.07314	0.044595	0.03024	0.016872	0.019091	0.06127	2.29796	0.795203	0.087483	0.025058	0.019194	0.068875	0.920801	0.658299
ENSG00000176697	BDNF	1.20074	2.39777	1.49874	3.76049	3.84283	0.852679	1.14693	0.957385	1.79899	1.63169	3.46223	3.00358	1.61073	0.866054	0.867956	1.25334	3.52354	3.37197	1.69468	0.969443
ENSG00000245573	BDNF-AS	0.054102	0.659043	0.36668	0.121905	0.078194	0.119113	0.056141	0.116161	0.116268	0.138313	0.035249	0.165137	0.092512	0.235514	0.061537	0.245581	0.126421	0.062974	0.107278	0.01919
ENSG00000145734	BDP1	9.88638	10.2145	8.79667	11.5298	11.4171	4.87944	3.41353	8.74761	9.05253	9.35967	14.2929	12.5611	4.87661	3.41597	9.4846	8.34033	15.1584	14.0066	5.93717	3.3121
ENSG00000126581	BECN1	6.70731	5.97076	6.1605	6.69664	18.5453	2.89994	6.76877	15.6676	6.20324	9.79235	7.51757	7.68876	5.24292	9.58865	14.6654	6.09277	8.31072	7.81664	4.08909	6.8504
ENSG00000178409	BEND3	9.1271	3.31757	2.50229	1.88606	2.02009	0.406057	0.098963	8.6252	2.65815	2.41506	1.79689	2.05561	0.245731	0.301049	7.26628	2.08666	1.50539	2.66642	0.348272	0.135646
ENSG00000188848	BEND4	7.12523	3.41133	2.52544	8.41236	10.796	0.098656	0.101872	7.53879	2.67442	3.70248	12.066	7.94611	0.049056	0.102991	6.99488	2.58448	10.0295	9.62799	0.148061	0.129608
ENSG00000162373	BEND5	1.47157	3.07409	2.10832	9.86135	12.2862	0.193173	0.178266	1.57889	5.6005	2.23769	9.18535	9.17063	0.100557	0.084613	1.20867	2.97317	6.37199	8.49622	0.501971	0.270786
ENSG00000151917	BEND6	0.521621	0.176058	0.115069	0.236052	0.191365	0.097776	0.134468	0.510674	0.124824	0.266189	0.21829	0.306405	0.064183	0.068048	0.554228	0.181788	0.358918	0.48012	0.109383	0.11973
ENSG00000165626	BEND7	3.10965	3.04467	3.43742	2.81121	3.30025	0.277677	0.139113	2.17958	5.8937	6.86356	7.64657	3.18782	0.203952	0.926289	1.02907	3.13761	3.69202	5.89799	0.63723	0.860663
ENSG00000167995	BEST1	0.033076	0	0.026701	0.217087	0.111995	0.035169	0.0858	0.023892	0.033212	0.039584	0.100826	0.142555	0.034683	0.064334	0.022204	0.096998	0.043109	0.159965	0.067864	0.077848
ENSG00000105829	BET1	13.2615	17.9143	17.465	7.33291	6.91397	5.80378	6.9403	14.5219	15.5376	18.2429	8.64739	2.56768	8.31906	7.07278	15.6113	12.8378	10.9799	2.02187	2.51037	4.84544
ENSG00000177951	BET1L	2.03153	3.19383	1.22161	1.05139	1.46411	0.835845	0.917796	2.73173	2.14593	1.44798	0.67366	0.799244	1.00056	0.48621	2.51137	0.904617	0.474861	0.734963	0.371404	0.190143
ENSG00000133169	BEX1	42.2108	80.6305	73.8703	124.341	117.617	7.35445	7.81975	46.8416	86.2386	70.8961	138.019	131.056	15.2995	9.36184	44.3673	51.0181	107.354	114.111	10.8957	7.08301
ENSG00000133134	BEX2	23.4532	16.2328	15.9584	29.6496	26.4886	3.58053	5.58224	24.1496	24.309	14.8998	35.3575	34.2033	6.37864	4.53259	32.2214	16.3986	30.3001	27.5618	4.56504	4.62787
ENSG00000166681	BEX3	142.033	131.532	136.908	90.0852	81.8124	24.7209	33.8835	161.995	170.424	148.615	122.415	113.17	44.0718	31.565	168.598	141.699	120.426	109.822	36.4981	36.061
ENSG00000102409	BEX4	28.3312	47.0069	44.7191	69.6409	65.8619	12.1424	14.4076	32.2862	52.5885	55.7539	90.7896	75.0444	15.467	13.8986	31.8301	35.4301	88.8284	77.3249	14.0539	15.1906
ENSG00000103429	BFAR	17.9739	14.8473	12.6394	14.6561	20.4269	4.55513	4.97487	35.164	16.0354	18.2538	20.3779	19.5543	8.39152	4.34634	21.6847	16.1907	16.5031	23.9994	4.60466	4.37971
ENSG00000125864	BFSP1	0.155826	0.148629	0.151098	0.057424	0.060969	0.062341	0.017446	0.122958	0.168608	0.180181	0.099012	0.112155	0.039545	0.011988	0.140293	0.137005	0.035176	0.041865	0.042933	0.020492
ENSG00000182492	BGN	0.083458	0.040516	0	0	0	0.860689	0.866972	0.211847	0.041981	0	0	0	0.387457	0.468403	0.040416	0.140546	0	0	0.183076	0.232728
ENSG00000198908	BHLHB9	0.732097	2.05673	1.42338	2.22875	1.94001	0.742251	0.348015	0.649048	1.3755	2.26615	3.21225	2.55485	0.467676	0.46404	0.946409	1.59087	2.98264	3.12398	0.689422	0.392095
ENSG00000134107	BHLHE40	0.336245	0.025643	0.132502	0.033977	0.09803	1.89996	2.26115	0.400868	0.461763	0.536208	0	0.083358	2.93282	1.72626	0.311096	0	0.063347	0.061742	1.83914	1.52512
ENSG00000123095	BHLHE41	0.258242	0.025426	0.129096	0.224547	0.257782	1.97225	1.14625	0.341907	0.026084	0.088647	0.133723	0.216217	1.57547	1.50803	0.605954	0.129033	0	0.120608	1.95114	1.29006
ENSG00000145692	BHMT	0.531738	0.085575	0	0.074836	0.036106	0.055931	0.028193	1.31634	0	0	0.150025	0.060795	0.061095	0.075075	0.569104	0	0.226256	0.101484	0	0.033034
ENSG00000122870	BICC1	0.183268	1.48565	1.72537	1.0189	0.778663	2.48212	1.47278	0.194393	1.78353	1.81719	0.678355	1.44578	2.17083	1.44026	0.258986	1.68677	1.45096	1.20823	2.81065	1.75239
ENSG00000151746	BICD1	7.57921	3.44335	2.7781	5.97423	4.82897	3.2342	1.13788	8.48844	2.12474	2.09527	7.03878	6.76983	1.4094	2.05394	7.41705	1.65375	6.26501	5.98493	2.33711	0.791979
ENSG00000185963	BICD2	4.32622	4.97982	3.50773	4.86344	4.95234	1.7317	2.01718	4.56293	3.90305	3.90273	4.64377	4.52143	2.21383	1.70276	4.53367	2.70775	4.5164	5.19881	1.63492	1.50753
ENSG00000135127	BICDL1	0.956677	0.708748	0.551716	0.54786	1.1818	0.14259	0.352697	1.10007	0.113561	0.362174	0.831944	0.404275	0.855104	0.110519	1.99834	0.070636	0.140211	0.566027	0.094641	0.079051
ENSG00000112624	BICRAL	2.16197	1.50788	1.50433	2.84726	3.21204	0.897894	0.489159	2.28005	1.26426	1.37681	3.20995	3.13405	0.644266	0.538245	2.1558	1.26864	3.65308	3.88481	1.09829	0.358372
ENSG00000015475	BID	3.32382	4.33467	4.45209	5.50624	4.43967	0.654367	0.623273	6.14448	5.56464	3.74852	5.66271	4.905	1.00997	0.365996	4.27812	3.82435	5.14074	4.60474	0.486986	0.518792
ENSG00000100290	BIK	6.047	0	0.264758	0.685362	0.133324	0	0	7.30709	0	0	0.41411	0	0.103863	0.085514	5.94646	0.179982	0	0.123675	0	0
ENSG00000136717	BIN1	0.641848	0.786742	0.760873	1.55441	2.27962	0.325811	0.239728	0.74068	0.872707	0.499029	0.709496	0.95836	0.170038	0.225277	0.582921	0.244572	0.243087	0.916158	0.087984	0.083553
ENSG00000147439	BIN3	1.36073	0.926292	1.03381	1.07151	0.651426	0.452834	0.672009	1.03552	2.1793	0.898346	0.429022	0.661453	0.273486	0.310808	1.75382	0.521614	0.067745	0.056336	0.090953	0.01973
ENSG00000110330	BIRC2	11.991	21.7672	22.9719	23.6545	18.2185	8.1151	7.58006	18.2236	30.561	27.1307	24.2711	24.8659	10.5498	8.75019	18.3575	24.6647	31.9007	22.4198	13.6669	8.3847
ENSG00000023445	BIRC3	0	0.173311	0.1178	0.034856	0.066599	0.813127	0.592543	0	0.069037	0.209727	0	0.042543	0.836671	0.285533	0	0.078256	0.052777	0.096886	0.774661	0.694887
ENSG00000089685	BIRC5	38.1393	33.5719	28.4486	2.41241	3.45585	3.86136	0.955912	33.0688	41.1535	24.6977	1.22867	2.48644	4.7801	3.13484	36.887	36.9674	5.13232	2.77161	1.34694	1.03127
ENSG00000115760	BIRC6	24.5521	23.4167	25.0375	26.185	26.3357	14.7018	9.74492	24.1071	21.6541	25.2729	25.5623	36.7964	15.2506	14.379	26.2188	28.708	33.311	30.5855	19.7488	9.39361
ENSG00000134897	BIVM	2.01112	5.48828	5.82121	8.06492	11.3101	4.94815	2.60636	3.02558	5.45678	9.5463	8.80902	8.54983	3.8134	2.85027	1.97261	6.6189	10.8596	8.10788	8.94339	2.61101
ENSG00000166619	BLCAP	8.34339	1.21799	1.07647	18.7485	3.27408	0.864214	0.691711	1.46795	1.05242	1.34076	2.36189	2.73787	0.582697	0.440185	1.35401	1.09167	1.57081	2.82513	0.619577	0.254708
ENSG00000197299	BLM	15.8827	16.8545	14.3467	3.34937	2.33417	0.884598	1.00667	14.9728	19.3341	18.7195	2.28283	3.89368	0.91584	0.977949	16.0055	15.0337	2.45461	3.75793	1.73954	0.345656
ENSG00000108578	BLMH	26.8065	26.036	25.6267	18.5755	16.3248	4.32111	3.3987	27.615	28.3923	31.8683	12.2505	12.5656	5.07161	3.50257	28.291	21.6083	11.5327	23.2453	4.87658	5.29402
ENSG00000095585	BLNK	0.014238	0	0	0	0.039525	0.133529	0.134259	0	0	0	0.018267	0	0.206013	0.212454	0	0	0.018245	0.030016	0.183797	0.204546
ENSG00000135441	BLOC1S1	10.6277	12.9439	8.53262	6.08891	8.21498	2.55445	2.68492	21.2684	10.7334	7.45719	0.915653	2.41604	1.13637	2.26399	15.9466	8.72434	0.207155	0.864281	0.323903	0.186394
ENSG00000196072	BLOC1S2	20.1762	20.8394	35.2028	24.2705	18.8189	3.95338	5.19702	17.687	20.8465	26.3314	33.202	27.8917	6.03525	4.49859	21.8133	23.8634	36.0098	25.729	5.74761	5.67366
ENSG00000189114	BLOC1S3	0.607063	0.628863	0.609931	0.549438	0.428928	0.285221	0.074428	0.536537	0.351121	0.483527	0.198027	0.355942	0.436744	0.101782	0.503548	0.389883	0.049774	0.223257	0.09147	0.043603
ENSG00000186222	BLOC1S4	2.98123	4.40262	4.00549	3.32817	3.19285	0.991059	0.793374	3.90873	2.81682	2.46521	2.78327	3.04234	1.72449	1.39954	2.21583	3.08677	3.15096	3.44111	1.05417	1.06983
ENSG00000188428	BLOC1S5	10.0721	17.9427	16.6121	5.52743	4.7609	2.6121	2.71466	10.5478	16.9575	17.4909	6.77586	6.31937	2.2654	2.24072	9.7465	11.7837	5.69097	6.477	3.26513	2.66279
ENSG00000104164	BLOC1S6	23.502	33.9573	32.1995	28.7661	6.08694	8.38713	3.11998	19.9837	25.0417	34.2253	15.67	26.6281	8.57171	2.54806	14.7729	19.9645	63.4418	27.7974	15.3105	12.8928
ENSG00000106605	BLVRA	9.14983	7.84565	2.67143	0.793822	4.82765	1.24278	1.9008	13.4307	2.49238	2.25979	0.983936	2.63438	2.16589	0.354856	14.3209	2.52801	2.58498	1.27234	0.859905	0.466377
ENSG00000090013	BLVRB	4.7394	0.262642	0.456135	0.395414	0.383068	0.262262	0.628319	4.29466	0.49418	0.355233	0	0	0.642424	0.42653	6.2078	0.397644	0	0.072204	0.294372	0.139637
ENSG00000117475	BLZF1	6.37116	7.68822	8.58443	6.32832	5.26929	3.53876	3.0084	7.95902	7.59931	9.64777	7.09261	8.2101	4.65008	3.31528	7.03179	8.27554	9.01488	9.30888	3.66288	3.30419
ENSG00000104081	BMF	6.92311	5.42419	6.14341	1.76391	1.5044	1.72487	1.64475	3.40015	10.7918	5.50193	1.31938	1.71893	1.74203	1.57428	3.13333	6.3083	1.13148	1.73504	1.50902	1.20404
ENSG00000168283	BMI1	2.29563	21.1694	21.4426	23.9738	19.0318	3.86877	3.64502	3.66113	18.4155	19.3771	20.0738	19.6145	4.58767	2.18177	3.4582	15.6198	28.109	19.4627	4.2758	2.44311
ENSG00000168487	BMP1	0.179578	0.454953	0.733434	0.614567	0.183892	0.670103	1.22444	0.090435	0.589244	0.168521	0.062633	0.091846	0.120452	0.094413	0.141699	0.129795	0.037708	0.077575	0.049892	0.033363
ENSG00000125845	BMP2	5.31548	0.774996	0.97394	1.18857	1.36246	2.03846	2.34814	5.58614	0.800447	1.45832	1.38915	2.18729	3.32919	2.00274	4.80184	0.758777	1.76335	1.93797	3.30082	1.53996
ENSG00000138756	BMP2K	8.54983	7.99674	7.43656	5.69568	6.35087	7.915	3.87651	7.41789	7.61625	9.0638	7.48753	5.82241	7.38431	3.7468	6.63187	11.0903	7.86863	8.40103	8.03563	4.08814
ENSG00000152785	BMP3	0.035703	0.678232	0.176452	1.13545	0.70535	0.321497	0.155379	0.05526	0.323451	0.426638	1.10782	0.925177	0.317401	0.109328	0.01729	0.501347	1.15483	0.701952	0.524236	0.040346
ENSG00000125378	BMP4	1.33963	2.32631	1.41758	0.215502	0.207604	0.625232	1.2059	0.360412	0.645173	1.75792	0.216012	0.087389	0.291377	0.388807	0.772465	0.978991	0.106256	0.227352	0.196586	0.259127
ENSG00000112175	BMP5	0.05206	1.91831	2.29904	0.522534	0.313227	3.45479	2.16842	0.080713	1.59056	2.73228	0.29958	0.370626	3.54062	1.99539	0.100598	2.3159	0.368356	0.269902	3.99096	1.6056
ENSG00000153162	BMP6	0.815549	0.937733	1.44967	0.054399	0.143449	0.193828	0.392214	0.669826	1.78474	1.90054	0.378401	0.192388	0.11562	0.613679	0.570604	1.61774	0.142728	0.170858	0.436422	0.412777
ENSG00000101144	BMP7	0.727934	0.946733	2.51168	0.480886	0.68122	0.841506	1.49432	1.01441	2.36255	1.02002	0.382075	2.21082	0.696	1.05403	0.899228	0.750635	0.414746	2.4852	0.6371	0.75171
ENSG00000164619	BMPER	0.010824	0.008227	0	0.032899	0.066794	0.683319	0.216587	0.002258	0.008764	0.012448	0.075746	0.430745	0.945079	0.2324	0.012657	0.003595	0.088145	0.090625	1.41283	0.593075
ENSG00000107779	BMPR1A	17.575	12.0932	8.76446	5.25357	5.55405	4.65813	4.34254	16.6152	10.3661	10.8763	9.7801	5.40399	4.80234	3.68909	18.8462	9.25898	5.87056	6.35652	5.98103	4.45434
ENSG00000138696	BMPR1B	0.027609	1.87513	1.77322	1.20023	1.78374	0.200286	0.028661	0.02952	2.75637	1.77319	0.186283	0.233378	0.068913	0.048983	0.018916	0.650961	0.277969	1.35485	0.132854	0.027302
ENSG00000204217	BMPR2	2.89397	4.76051	4.10502	15.4541	13.5507	7.17311	5.36755	2.72336	3.32664	3.41502	15.2227	13.8259	5.4065	4.2281	2.68194	2.94933	16.7636	17.3935	8.509	3.62073
ENSG00000165733	BMS1	13.5722	9.80893	7.92552	5.9629	5.85121	2.26855	2.22907	15.2546	11.4719	10.9009	4.89071	6.37408	2.5924	2.32927	15.6723	9.17357	4.9663	6.89949	2.35215	2.11143
ENSG00000204177	BMS1P1	0.972855	1.68832	1.69988	1.48086	1.25064	1.36012	0.672529	0.685872	1.52411	1.57127	1.03395	1.43345	0.548221	0.593336	0.587116	1.74719	1.6697	1.56624	1.07152	0.375667
ENSG00000164603	BMT2	3.34088	14.2093	11.2878	10.4856	9.92562	3.67672	4.4666	3.24972	13.5437	14.6977	13.7533	11.5757	5.11904	4.19525	4.59169	9.03585	15.1671	11.8551	6.01215	3.49345
ENSG00000169594	BNC1	0.042695	0.521906	0.315457	0.081838	0.316402	0.022655	0.041381	0.022248	0.280269	0.221153	0.110101	0.267698	0.134066	0.018864	0.062649	0.108387	0.138372	0.223434	0.227093	0.048487
ENSG00000173068	BNC2	4.60035	0.860421	0.516985	0.848006	1.30107	1.95759	0.503837	4.43197	0.24325	0.780927	0.881353	1.0938	1.08565	0.54036	6.4617	0.379408	0.92766	1.09288	1.97208	0.619759
ENSG00000113734	BNIP1	3.24173	4.89684	3.87316	2.32612	0.831106	0.487957	0.477865	4.34078	5.42004	4.85008	1.02641	0.998536	1.03369	1.09668	3.51107	4.43673	0.860195	0.913915	0.34757	0.356141
ENSG00000140299	BNIP2	27.743	15.6614	11.1446	10.4524	7.45667	7.00509	7.14479	22.7552	13.0297	14.7256	11.9143	11.7639	9.8285	5.44551	31.2908	10.3947	13.6372	11.0765	7.41136	5.01211
ENSG00000176171	BNIP3	10.1545	6.48736	2.90279	10.3955	4.61276	2.54603	6.34883	9.05981	2.9023	6.86034	10.4279	4.30715	3.70391	5.22718	7.60688	6.58416	5.29668	4.66336	2.83747	2.38095
ENSG00000104765	BNIP3L	24.1341	62.0995	60.4352	81.8403	61.8458	2.41055	13.6039	23.6251	58.2382	64.5109	89.4751	85.9817	17.2812	13.0666	23.5367	36.9855	22.0408	79.1886	16.9734	2.43535
ENSG00000163141	BNIPL	2.18499	0.138151	0.044059	0	0	0.149875	0.033966	2.43259	0.107894	0.081484	0	0.036621	0.515639	0.031276	2.86618	0	0	0.041162	0.125647	0.039798
ENSG00000144857	BOC	0.285829	5.87535	5.54733	0.152369	0.322325	2.8395	1.19145	0.414397	7.02597	5.12628	0.338734	1.17822	1.41443	1.05802	0.495662	7.06121	0.123452	0.406553	4.73142	1.1615
ENSG00000145919	BOD1	47.2839	50.9621	56.6848	23.1996	22.5888	7.20051	9.39242	73.4256	66.5402	62.4947	27.1095	33.2537	12.1852	7.9449	62.7973	58.7204	27.5082	27.5253	12.021	10.4391
ENSG00000038219	BOD1L1	6.43457	6.63688	5.07326	7.84557	8.09993	4.67271	3.52564	5.73191	4.94358	5.86318	6.27827	10.661	3.52583	2.86728	5.91536	5.17679	7.11877	7.77367	4.4233	2.67064
ENSG00000176720	BOK	0.869489	0.180112	0.169844	0.36375	0.551295	0.071567	0.048474	1.00791	0.106946	0.039515	0.180423	0.128561	0.054716	0.043731	0.808685	0.115606	0.043147	0.257976	0.041098	0.01979
ENSG00000178096	BOLA1	1.03804	1.82446	2.04994	0.537183	2.14833	0.147968	0.600407	1.37721	2.03845	3.0606	1.63951	0.866986	0.733583	1.10825	1.28661	2.21183	0.956835	1.05923	0.248714	0.552246
ENSG00000163170	BOLA3	21.4998	7.23464	7.11158	3.71177	9.09497	3.86078	3.53495	24.1218	7.17992	7.92885	4.29716	6.5419	2.87522	2.10408	25.6792	7.53656	2.52004	5.41183	1.81347	3.01984
ENSG00000225439	BOLA3-AS1	1.74289	1.66908	1.30628	3.52809	2.92482	0.498475	0.42902	2.25177	1.36317	1.28236	2.96127	2.6327	0.751135	0.436545	1.57063	1.13725	2.03167	1.87719	0.652976	0.556659
ENSG00000261236	BOP1	0.445469	0.068105	0.062917	0.041442	0.059656	0	0.009349	0.216783	0.071989	0.022428	0.030968	0.024595	0	0.004262	0.173478	0.024732	0	0.022604	0	0
ENSG00000136122	BORA	8.78264	11.7096	12.3835	1.89361	1.8659	0.840797	0.474055	8.62566	15.13	16.911	1.70672	2.33189	1.04329	0.727618	9.24586	14.7062	2.01486	2.7601	1.79852	0.485437
ENSG00000165714	BORCS5	0.669622	0.806682	0.628747	1.26644	0.784221	0.768733	0.112881	0.834652	0.906372	1.25721	0.530032	0.813968	0.294722	0.439725	0.711	0.791978	0.706293	0.942246	0.638951	0.22579
ENSG00000166275	BORCS7	2.23826	18.8042	18.8996	10.5408	6.97847	3.75523	3.52715	2.92177	15.077	15.095	8.61904	8.68193	6.19727	3.17842	2.79414	10.8753	11.355	9.78786	5.38789	3.49797
ENSG00000254901	BORCS8	0.586235	0.537058	0.322409	0.253778	0.342237	0.080885	0.084528	0.269338	0.602239	0.139375	0.313802	0.49755	0.037445	0.01567	0.402807	0.19349	0.096362	0.179628	0.022697	0
ENSG00000172331	BPGM	2.57239	13.9706	3.53224	13.9549	4.58891	0.953868	6.04819	3.23912	5.00147	5.51699	7.25384	7.04685	1.70286	3.85218	5.4399	8.21781	7.60354	6.95475	1.47427	1.76601
ENSG00000137274	BPHL	10.303	17.9848	7.06244	10.1646	18.4046	1.02839	0.812134	15.9541	16.4528	15.9305	7.16051	12.2763	1.37305	1.86144	13.7371	11.7537	1.94667	12.0329	0.887353	0.52851
ENSG00000162813	BPNT1	4.32957	7.07163	6.31304	6.95876	6.23638	2.16846	2.15273	5.572	8.04915	7.64893	5.60777	6.36022	2.89285	2.35003	4.64589	8.24096	5.7227	5.14168	4.365	1.98141
ENSG00000171634	BPTF	44.0471	25.084	16.5801	23.2925	31.3306	8.95444	9.58379	53.2201	32.7179	26.6381	26.859	39.2121	7.06011	7.5339	42.6226	21.4511	42.6069	43.5952	9.8777	9.58731
ENSG00000157764	BRAF	5.71441	6.18667	4.85023	8.23062	6.86221	2.88347	1.80576	5.47642	4.73492	5.6203	9.63093	9.62415	2.95571	2.17935	5.58092	4.79252	10.3089	10.3027	4.00562	2.35576
ENSG00000089234	BRAP	7.55572	7.51709	6.55368	7.50855	6.19839	1.95046	2.40718	9.30461	7.2172	7.34141	7.33829	8.0303	2.55666	1.70988	9.28769	6.02672	6.89183	11.3375	2.30752	1.74439
ENSG00000106009	BRAT1	0.635137	0.837958	0.487031	0.055769	0.858045	0.112591	0.141301	0.596281	0.450915	0.095414	0.057869	0.077848	0.036391	0.079317	0.591061	0.227612	0.034236	0.07119	0	0.017337
ENSG00000012048	BRCA1	12.2854	16.1822	21.46	1.58524	1.71669	1.58674	0.85301	14.4692	24.4167	27.8999	1.2826	3.22311	1.49408	0.992112	11.5476	14.6593	2.07899	2.18879	1.88894	0.888527
ENSG00000139618	BRCA2	9.58407	10.1708	8.23055	1.14	1.07227	1.61766	0.87494	8.78759	10.2725	10.5033	1.03393	2.37177	1.03296	0.696273	8.87446	5.4456	1.69935	1.51767	1.92165	0.539335
ENSG00000185515	BRCC3	8.58837	14.2011	12.3553	11.1985	8.54309	2.35189	1.58428	8.91926	12.3641	17.628	9.12431	13.189	2.11224	1.59517	8.16118	11.8547	15.5936	13.1986	2.47484	1.59914
ENSG00000100425	BRD1	2.00424	2.97895	1.81968	1.45473	2.68997	0.568105	0.602225	2.56794	1.73144	1.5504	1.53654	1.29055	0.653336	0.41405	1.22158	1.01455	1.34163	1.76853	0.680654	0.287323
ENSG00000204256	BRD2	17.8646	14.217	22.9447	9.9826	17.3535	11.4207	4.55602	26.3827	17.3306	30.4813	19.124	17.6852	5.39731	5.96709	22.3931	12.4291	12.6253	29.7712	4.08303	3.1576
ENSG00000169925	BRD3	4.28657	3.35508	2.29453	5.41983	4.63777	1.39181	0.862013	4.72703	2.97093	2.55646	4.49286	4.52468	1.01068	0.937621	4.05869	3.23414	4.38657	5.00674	1.69548	0.757941
ENSG00000235106	BRD3OS	1.27022	1.96319	1.9356	1.88886	1.74308	0.551091	0.823962	1.13892	1.70879	2.12384	1.10675	1.65427	0.829631	0.732989	1.15673	1.55323	0.849934	1.62288	0.319629	0.505147
ENSG00000141867	BRD4	1.28106	1.10817	1.01147	0.802701	1.04515	0.482713	0.34856	1.15846	0.763517	0.60598	0.251525	0.611207	0.348035	0.234463	0.930041	0.698794	0.411715	1.56912	0.420802	0.256885
ENSG00000166164	BRD7	9.91447	26.8479	24.3114	7.48305	11.1979	2.0098	3.86677	25.356	32.4994	31.2224	18.136	8.06413	2.42121	1.9753	26.867	26.1163	7.8692	14.5678	2.44321	2.67395
ENSG00000112983	BRD8	13.8232	22.0676	17.5798	7.93237	14.9216	4.08161	3.59807	22.9613	24.2268	11.2448	13.9113	17.9867	4.85522	4.01808	16.3161	20.8167	9.11573	9.33752	4.97166	1.52272
ENSG00000028310	BRD9	1.10462	1.00131	1.01571	2.67121	1.38824	0.33639	0.2066	0.958275	0.935303	0.871535	0.414028	0.429515	0.229734	0.185159	0.804514	0.997861	0.238184	0.560985	0.232023	0.158084
ENSG00000185024	BRF1	0.483689	0.370469	0.382961	0.463987	0.255786	0.090937	0.059274	0.323133	1.3868	0.2284	0.102152	0.157937	0.089353	0.090244	0.162035	0.141342	0.077557	0.134898	0.087027	0.013863
ENSG00000104221	BRF2	2.43514	3.75036	3.16062	2.16574	2.22839	0.587646	0.678357	4.16497	4.57067	3.6154	1.38206	1.83038	0.746819	0.764788	2.72612	3.17938	1.38859	2.0549	0.607545	0.582993
ENSG00000164713	BRI3	0.887214	0.920115	9.90677	0.415593	0.563668	0.351761	0.377393	1.26875	0.923818	0.561676	0.394848	5.6316	0.36843	4.91018	13.0159	0.383326	0.18805	4.41605	0.176237	0.210011
ENSG00000184992	BRI3BP	3.06184	4.94853	4.23654	2.72034	2.75651	1.83882	1.21871	3.08779	4.25427	5.18315	2.21354	2.61092	1.99703	1.07256	3.01319	2.82775	3.03186	2.62318	1.87856	1.32376
ENSG00000078725	BRINP1	3.91309	0.08317	0.048304	0.612177	8.26884	0.184564	0.242255	4.54281	0.048707	0.018208	1.15747	2.20319	0.08317	0.079674	1.09233	0.038052	0.517603	6.17626	0.164283	0.049514
ENSG00000198797	BRINP2	0.231376	0.500325	0.414565	2.18492	1.3191	0.189096	0.150339	0.080693	0.442869	0.267965	2.25257	2.10504	0.133005	0.248299	0.125903	0.56234	1.4674	1.91239	0.078486	0.058815
ENSG00000162670	BRINP3	0.015476	0.119729	0.094803	8.81373	10.7887	1.08929	0.131488	0.056093	0.10078	0.185774	9.8908	11.8567	3.23726	0.182593	0.022522	0.087477	9.31598	14.0661	0.980642	0.182724
ENSG00000136492	BRIP1	10.7891	17.9078	12.6995	1.18935	0.955448	1.02133	0.464781	8.92268	16.116	23.6723	0.885158	1.47616	1.48252	0.603259	11.3161	13.863	1.67814	2.3652	1.33695	0.421486
ENSG00000113460	BRIX1	25.0063	25.0244	25.7308	9.6027	10.654	3.52782	3.18664	27.7565	24.9619	29.5025	12.8711	14.0531	4.89304	3.54891	28.1726	28.445	16.7982	4.76882	1.99789	5.39582
ENSG00000254999	BRK1	53.1882	60.9101	54.0694	56.9354	51.7959	15.5533	16.6676	64.8329	66.1724	55.0725	52.0343	56.4932	23.2979	15.4594	61.7766	58.1807	46.3082	59.1763	15.3374	13.2185
ENSG00000174744	BRMS1	5.79736	3.10954	2.26137	2.23937	2.69789	0.376907	0.975224	5.52628	3.02908	2.17838	1.96176	1.28511	0.461033	0.244015	5.92203	2.12936	0.301025	0.988748	0.145019	0.085156
ENSG00000100916	BRMS1L	4.41167	7.92304	3.57806	2.54122	2.73229	0.893279	0.890578	5.20369	7.68589	9.62646	3.69026	3.4608	0.632144	0.822807	4.76085	1.95846	4.64517	7.6845	1.57549	0.563416
ENSG00000162819	BROX	12.8668	25.1556	16.5136	12.5334	14.2847	4.97253	6.41973	18.5728	17.9246	23.6531	17.8552	16.598	8.09747	4.76155	17.0437	15.1248	18.4273	16.0638	5.79418	4.28766
ENSG00000156983	BRPF1	1.7047	1.20048	1.58466	0.876806	1.14847	0.302914	0.227606	2.02954	1.51242	1.03144	0.260796	0.642972	0.305543	0.15836	1.33077	1.19625	0.346218	0.642046	0.110018	0.225149
ENSG00000096070	BRPF3	1.75832	2.20474	1.27406	2.65546	2.00745	0.509225	0.3072	2.14288	1.53255	1.30207	1.09773	1.28332	0.493268	0.300317	1.74027	1.47973	1.33309	2.07085	0.351807	0.284862
ENSG00000160469	BRSK1	0.81627	0.705082	0.798122	1.99854	4.14706	0.055149	0.226303	0.980956	0.635382	0.374073	0.806906	1.51418	0.149885	0.078043	0.717194	0.500033	0.30395	1.62834	0.072072	0.05597
ENSG00000174672	BRSK2	0.087381	0.176338	0.116718	0.197308	0.249541	0.026035	0.008981	0.065965	0.118192	0.066675	0.064116	0.069229	0	0.011159	0.051839	0.069112	0.015149	0.11635	0.003741	0.003603
ENSG00000185658	BRWD1	11.8883	9.87124	9.38975	13.5218	13.2683	6.50754	4.37762	12.4156	9.50561	14.3048	18.0685	14.2312	5.87711	3.97537	12.2217	10.0166	17.228	15.7571	6.75401	6.88148
ENSG00000165288	BRWD3	10.3036	6.15777	5.39051	9.03156	8.18631	4.21389	2.60337	7.90419	4.59753	6.62468	8.34967	8.8329	3.46869	3.06862	8.64682	5.54882	11.7425	10.6945	6.14869	2.87142
ENSG00000160058	BSDC1	10.3226	5.45918	3.58572	8.55093	13.7015	1.67229	1.69331	9.55714	9.35318	3.13994	4.68138	4.7956	2.55086	1.18178	10.9753	3.33695	1.95467	5.49293	1.18369	0.983867
ENSG00000172270	BSG	9.34387	13.0666	14.3622	3.62397	7.01961	3.03134	3.73812	16.9141	16.7063	3.17626	0.832883	1.44244	1.29182	0.599614	15.9203	2.04412	0.567154	0.90819	0.455396	0.523577
ENSG00000164061	BSN	0.125047	0.328025	0.287003	0.730964	0.718592	0.078551	0.030272	0.143802	0.113674	0.194712	0.271907	0.30862	0.057791	0.032676	0.122882	0.121467	0.241392	0.449163	0.029985	0
ENSG00000119411	BSPRY	1.0821	0.042491	0.21197	0.168326	0.162427	0.434535	0.165467	1.0806	0.132963	0.301249	0.055869	0.315598	0.505083	0.143196	1.36273	0.146664	0.339838	0.302843	0.102193	0.147624
ENSG00000130303	BST2	22.2495	0.267339	0	0	0	0.096116	0	30.4256	0.149547	0	0	0	0.094162	0.080832	23.5495	0.308098	0	0	0.107884	0
ENSG00000095564	BTAF1	15.0256	14.2034	14.5146	7.62507	9.12925	6.35315	5.69029	16.2606	14.2255	16.2063	11.1864	10.1392	6.97561	5.62961	15.1724	15.0769	10.5724	9.96664	7.23971	4.86273
ENSG00000064726	BTBD1	22.4441	25.1226	24.132	20.3097	21.9085	10.0314	10.12	26.5282	18.3407	27.8167	33.641	31.8069	15.0413	7.38729	22.7389	23.1411	27.8998	21.7211	9.02882	10.0758
ENSG00000148925	BTBD10	16.8578	21.2527	21.4024	38.1823	37.9077	3.54803	3.18679	12.9626	18.5367	19.0018	52.0022	48.3431	5.04171	5.76253	18.4654	26.7744	42.8164	56.0746	7.91221	5.11645
ENSG00000151136	BTBD11	1.03497	0.013793	0.01345	0.028873	0.038149	0.158973	0.043369	0.069983	0.011338	0.010112	0.039848	0.043387	0.062163	0.06143	0.660274	0.006647	0.029823	0.032269	0.121157	0.023845
ENSG00000133243	BTBD2	1.06829	0.670238	0.636476	0.316882	0.429454	0.174238	0.126027	1.45415	0.985226	0.423529	0.094169	0.180199	0.200179	0.12446	0.798638	0.466941	0.072324	0.212211	0.017433	0.016457
ENSG00000132640	BTBD3	25.0409	46.5898	37.5927	40.1639	44.6421	11.9626	9.33769	25.5621	23.3361	41.8847	31.8301	52.7399	13.5817	9.61656	24.2544	30.6224	39.5637	39.2865	12.9077	4.69172
ENSG00000184887	BTBD6	2.02013	7.63823	5.69883	5.63702	3.83861	1.08045	0.48727	3.75986	4.8399	4.80137	4.50635	4.49997	0.941933	0.564919	2.2879	3.81157	2.12154	4.82481	0.938357	0.571897
ENSG00000011114	BTBD7	6.44263	4.3399	4.68661	4.41896	6.09305	2.27296	0.906655	4.5134	7.62659	4.67031	3.23081	6.07223	1.49033	1.15354	3.57755	5.98893	5.79264	3.84541	2.25986	0.966157
ENSG00000183826	BTBD9	0.436594	2.40068	2.91567	2.02559	2.08298	1.07077	0.199392	1.27869	1.51742	2.48506	1.8375	1.7874	0.278202	0.907898	1.25802	2.34181	2.10507	2.30823	0.491144	0.195518
ENSG00000169814	BTD	3.09481	0.276978	0.497374	0.369947	0.226127	0.240635	0.331498	4.76458	2.01457	0.307876	0.317869	0.274614	0.343057	0.208354	5.39317	0.442901	0.285462	0.372826	0.17017	0.242632
ENSG00000145741	BTF3	346.333	289.008	329.169	177.819	172.819	59.0192	71.3294	339.804	290.354	385.59	161.057	204.748	96.9534	60.2902	295.919	296.737	151.799	190.616	66.5606	62.7083
ENSG00000134717	BTF3L4	31.7305	41.5464	36.4448	36.6752	30.209	6.30388	6.01837	28.8099	37.8618	49.6614	52.9931	74.3803	6.0459	9.18387	32.7648	34.132	51.1835	40.4276	2.36336	5.35131
ENSG00000133639	BTG1	12.1256	33.6988	22.6963	14.4491	10.8287	13.2349	6.50283	13.2559	28.8873	27.6021	13.2212	14.2983	11.268	7.47002	11.9131	30.8426	14.817	13.01	11.7011	6.28198
ENSG00000159388	BTG2	0.924315	9.62103	10.0088	5.93968	4.82439	4.19836	4.75402	0.765443	10.3363	11.3003	3.46389	4.45031	7.53281	5.47758	1.04788	12.5511	5.32688	5.83326	5.2339	4.21356
ENSG00000154640	BTG3	9.56371	17.0002	14.3497	4.93724	3.24524	7.92496	15.9287	10.312	16.392	16.8836	3.22154	3.58387	11.8549	17.1263	6.25236	19.3741	4.48618	3.16801	13.6428	10.9534
ENSG00000124557	BTN1A1	0	0.752863	0.831894	0.045032	0.043889	0.075045	0	0.109453	0.89107	0.642733	0.044236	0.073532	0.036764	0	0.034246	1.11208	0.041753	0.203969	0.084234	0.038962
ENSG00000112763	BTN2A1	1.88051	4.01609	3.69727	4.00839	4.11035	0.851025	1.26088	1.96778	3.82783	2.70392	2.57249	4.34038	1.18994	0.932088	2.54778	3.36772	2.51009	3.67421	1.22953	0.791428
ENSG00000124508	BTN2A2	2.91519	2.3025	2.61472	0.445432	0.569261	0.57601	0.858618	1.70503	3.46699	2.356	0.246323	0.875676	0.621837	0.674884	2.38318	2.36818	0.248478	0.573547	0.470475	0.648302
ENSG00000124549	BTN2A3P	0.225552	0.569858	0.795539	0.137017	0.103302	0.388294	0.225527	0.372471	0.766742	0.760784	0.030034	0.164048	0.241044	0.244632	0.516005	1.2087	0.17583	0.086908	0.356934	0.107189
ENSG00000026950	BTN3A1	0.499743	1.42563	1.55496	0.515571	0.77373	0.913017	0.926107	0.572032	2.54822	2.46961	0.633954	0.513887	0.861442	0.63215	1.0408	2.58134	0.52314	1.1274	0.715581	0.635487
ENSG00000186470	BTN3A2	0.412837	1.09394	0.59287	0.319685	0.291307	0.887348	1.12386	0.269444	0.701564	0.765638	0.074784	0.198995	1.33313	0.685307	0.31481	0.762082	0.180421	0.101708	0.855151	0.524963
ENSG00000111801	BTN3A3	0.182474	0.089818	0.287126	0.027573	0.035945	1.52314	0.701724	0.145173	0.099316	0.290239	0.045499	0.018718	0.762343	0.295906	0.288266	0.336346	0.085608	0	0.406116	1.06244
ENSG00000166167	BTRC	6.24867	6.93834	0.929716	1.31704	9.85156	0.433578	0.687617	1.10656	6.98132	0.612327	3.1461	11.2873	3.59525	0.249265	7.33253	0.479972	1.42745	12.796	1.32514	0.949912
ENSG00000169679	BUB1	94.8031	33.3429	40.1819	2.47632	2.75529	2.93743	2.0337	95.0554	33.8268	40.348	2.25123	3.09498	5.71679	2.15316	92.2746	43.7414	2.9763	4.10508	3.18177	2.75611
ENSG00000156970	BUB1B	55.4344	36.6008	35.9711	4.51083	5.28814	4.4819	4.93106	56.379	42.3903	43.3815	4.51943	9.89509	5.68771	4.13078	56.0289	46.6334	4.32927	6.3435	5.35087	3.32777
ENSG00000154473	BUB3	64.1287	64.6826	67.2552	46.3212	43.7936	4.97138	7.79704	70.4981	82.845	71.8175	35.4639	71.2309	9.6841	4.93449	73.9622	67.912	63.9334	49.0412	8.05523	3.62542
ENSG00000137656	BUD13	9.89868	12.4236	13.1016	4.82177	4.91171	1.42572	1.92926	10.4745	12.7855	13.0222	2.86289	5.40973	2.03073	1.70832	10.4964	14.4475	3.18172	6.5156	1.37049	1.41775
ENSG00000071462	BUD23	4.46353	1.21252	1.43691	1.20243	0.580828	0.471654	0.527048	5.75316	1.54605	0.996172	0.160408	0.405593	0.425736	0.334294	9.77611	1.12714	0.124343	0.407705	0.325446	0.163356
ENSG00000106245	BUD31	20.6637	32.687	30.0963	10.1854	16.2182	3.80368	6.76193	28.5973	32.3814	35.9194	11.2242	27.2171	12.461	4.38797	26.0398	30.3405	8.47719	8.509	9.5921	5.19495
ENSG00000112276	BVES	0.917159	2.54284	2.44657	2.54184	2.32561	1.29405	0.813933	1.04022	1.81235	2.36231	2.91786	2.44786	1.26735	0.955996	0.820553	2.24297	3.31924	3.05908	1.25544	0.780791
ENSG00000112578	BYSL	3.72838	4.6531	3.10678	1.17437	2.00788	0.59183	0.436093	4.39477	4.3203	2.99173	1.33236	1.33328	0.379707	0.120708	4.64134	3.40909	0.575686	1.85759	0.304489	0.208384
ENSG00000082153	BZW1	54.723	77.7365	72.1592	47.0158	44.7137	15.4619	12.8842	60.9741	81.8538	89.2609	59.6204	58.3369	17.2418	13.649	57.4437	66.6918	70.3665	53.1604	18.8649	14.5899
ENSG00000136261	BZW2	40.6743	51.0035	52.749	67.7924	53.9713	7.21637	1.83038	42.7884	53.093	48.5977	86.4788	80.3834	2.9254	1.96064	39.9518	65.3425	62.0938	52.7239	2.88061	7.41601
ENSG00000120029	C10orf76	2.5183	4.84611	3.71479	3.48296	2.79811	0.944121	0.81448	3.16204	4.97806	3.78386	3.28058	3.38519	1.88683	1.01327	3.40014	4.33956	2.51644	3.14245	1.37939	1.12661
ENSG00000165863	C10orf82	1.67205	0.794179	0.367805	1.52956	1.31045	0.044795	0.081825	1.96389	0.560975	0.339634	0.925793	0.446782	0.088656	0	1.73182	0.642944	0.51633	0.619202	0	0
ENSG00000119965	C10orf88	5.81006	4.86159	4.12325	5.12726	5.18285	1.66489	1.82576	6.41395	4.78242	7.27679	8.01893	6.68396	2.02062	0.878759	4.8012	4.93303	8.39179	6.84657	2.38133	1.03852
ENSG00000137720	C11orf1	5.26643	4.31597	3.95675	5.17692	4.87565	2.32914	1.1098	3.82945	5.09615	6.11118	6.23826	5.78349	1.81447	2.06917	7.03595	9.69932	4.09531	4.46411	0.338054	1.23148
ENSG00000171067	C11orf24	4.13423	2.46974	2.19412	0.909797	0.939801	0.482839	0.731472	3.84868	3.3596	1.26173	0.636268	0.74136	0.921742	0.454241	2.00803	1.44602	0.673084	0.988278	0.371203	0.672119
ENSG00000149179	C11orf49	4.76339	8.27163	2.64249	7.29404	6.50562	1.92272	1.66005	4.85428	0.912202	3.8247	5.58552	3.96943	0.585147	0.996447	2.90202	8.6031	0.856131	1.09924	2.76741	0.57733
ENSG00000182919	C11orf54	7.29747	16.9425	13.4931	4.68821	5.09613	5.09441	4.63101	6.5683	16.7289	21.6365	8.49001	7.38037	7.62726	4.25266	7.01276	26.296	9.57753	9.12674	3.94401	4.2221
ENSG00000110696	C11orf58	84.9301	92.1202	108.974	76.7499	54.1445	20.3282	26.1317	92.2014	115.07	122.14	75.5093	74.8173	24.7837	22.5392	89.4608	84.4776	74.9375	61.9889	19.4847	21.0687
ENSG00000175573	C11orf68	1.14207	1.41144	1.33257	0.936816	1.19049	0.35546	0.412315	2.46692	1.75363	0.923042	0.340378	1.07988	0.420122	0.236782	2.23654	0.859859	0.242478	0.539945	0.319186	0.288496
ENSG00000137691	C11orf70	1.2448	3.9722	6.48452	0.73487	0.240004	1.20087	2.10247	0.350344	4.27007	2.69359	0.647007	0.848617	1.52476	2.43177	1.90263	1.82409	1.29428	1.04332	2.0977	2.10899
ENSG00000180425	C11orf71	2.17233	2.55543	2.84745	6.99188	8.44831	1.24881	1.53199	1.62807	3.18354	3.90926	12.9444	9.01026	2.16518	1.62602	2.1596	2.01063	9.34758	8.18726	1.65657	1.55498
ENSG00000166352	C11orf74	8.56943	12.8928	19.779	14.1168	11.9123	5.60619	9.84379	11.3395	24.9353	27.7162	21.0675	21.7519	7.13231	9.71444	13.6821	25.7803	26.6896	23.042	7.53336	14.611
ENSG00000173715	C11orf80	3.75821	4.12234	2.68353	2.21321	3.63528	0.784213	1.71392	5.45055	6.09518	4.52055	3.46788	3.72012	1.91272	0.528608	2.00549	7.84931	4.31065	3.16908	1.13687	0.960522
ENSG00000168005	C11orf84	4.05884	4.15507	1.61572	1.11513	1.42024	0.240242	0.421686	7.85025	2.14288	1.37356	0.412937	0.485588	0.293473	0.252043	6.18224	1.4317	0.300496	0.598759	0.318255	0.248073
ENSG00000185742	C11orf87	0.227108	0.236135	0.10506	7.19491	6.88394	0.589496	0.226376	0.140554	0.053031	0.060075	6.95786	8.55459	0.621152	0.199992	0.08509	0.058884	9.12126	9.65232	0.596838	0.197371
ENSG00000183644	C11orf88	0	0	0	0.596997	0.098953	0.525306	2.64704	0	0	0	0.235459	0.61511	0.603544	3.14765	0.030529	0	0.282798	0.253691	2.39005	4.26395
ENSG00000188070	C11orf95	3.68086	6.76294	6.19025	11.0038	11.9453	0.801058	0.961589	4.81742	7.36763	6.30047	13.297	13.1289	1.23951	0.93462	3.60384	6.71251	11.647	13.9215	0.813647	0.609545
ENSG00000139637	C12orf10	5.3255	2.50255	2.18833	1.2186	1.64272	0.469393	0.578047	8.4006	5.5553	2.58803	1.33363	0.82276	0.538944	0.425111	5.95295	1.17182	0.315764	2.35585	0.333176	0.045874
ENSG00000133641	C12orf29	4.10492	7.74168	9.35476	1.8564	4.23402	2.95318	3.09063	4.29316	10.171	11.0401	4.1557	4.18073	3.81307	1.20185	4.03326	8.24002	2.24664	4.72428	1.40351	1.26946
ENSG00000047621	C12orf4	5.02928	9.5321	11.0611	11.0332	8.84647	2.63282	2.2424	5.42738	11.1519	14.0475	14.2043	12.4668	2.94609	1.68212	5.60856	13.9353	15.1181	12.2201	3.02132	1.72632
ENSG00000157895	C12orf43	2.45705	2.31114	2.09792	1.15209	1.63847	0.353664	0.254535	2.64752	2.28166	2.49449	1.06032	0.953867	0.175074	0.272603	2.07087	1.91441	0.749365	0.786068	0.348009	0.207888
ENSG00000151131	C12orf45	3.03795	4.36649	2.26694	1.58738	1.45841	0.829935	0.394801	2.21672	2.25509	2.52571	1.55118	1.66221	0.666959	0.417786	2.29574	1.97056	2.20672	2.17833	1.01884	0.407387
ENSG00000111412	C12orf49	7.744	7.631	6.63729	14.1526	10.5691	2.36458	2.14232	8.4581	6.9729	7.49559	19.7015	19.0953	5.36282	5.55551	8.19405	9.48618	20.5741	12.2214	2.70722	1.81108
ENSG00000185306	C12orf56	0.297007	0.178404	0.060741	0.07177	0.020571	0.025208	0.110651	2.33328	0.03742	0.128444	0.143641	0.113913	0	0.016433	2.86962	0.18885	0.04822	0.04347	0.019959	0.02112
ENSG00000111678	C12orf57	7.84677	12.263	10.1768	4.44983	8.07822	0.415681	2.51605	12.9594	11.3645	2.71494	1.44932	1.79267	0.697007	0.290583	6.36864	2.89385	0.44086	0.802716	0.267379	0.063731
ENSG00000182993	C12orf60	0.773849	0.132809	1.377	0.093175	0.791604	0.081732	0.026218	1.0857	0.824103	0.418007	0.224349	0.084756	0.065874	0.079609	1.17218	0.08137	0.076193	0.105086	0.089865	0.469736
ENSG00000130921	C12orf65	3.65517	6.42286	3.7086	2.0955	2.94409	0.815811	1.99039	3.16337	7.28607	4.78608	3.45053	2.40158	1.81728	1.35058	1.82469	7.88064	1.70801	3.5264	1.69157	0.722834
ENSG00000174206	C12orf66	1.39887	1.74647	1.21656	0.819725	0.396546	0.324327	0.665212	0.82434	0.966628	1.31944	0.59403	0.473137	0.285461	0.331463	1.09405	0.633023	0.663387	0.531255	0.461234	0.231
ENSG00000204954	C12orf73	1.21452	4.29022	2.88664	2.51124	2.42002	0.462352	0.197102	0.572145	4.21191	0.59307	3.97885	2.7933	0.321791	0.344383	0.651468	0.652174	0.740938	6.81541	0.39151	0.244447
ENSG00000235162	C12orf75	0.417857	0.459391	0.524734	0.5503	0.465789	0.506121	0.330117	7.85285	0.519057	0.635847	0.524685	0.642077	0.655277	0.324605	7.34699	0.56137	0.661341	3.46015	4.44645	0.31932
ENSG00000174456	C12orf76	0.614066	0.921205	1.21835	1.6815	1.54863	2.0892	0.609053	0.673149	0.933779	1.07007	2.33997	2.05744	0.606674	0.5733	0.601255	0.912754	2.18038	2.14642	0.696321	0.641459
ENSG00000226792	C13orf42	5.42492	0	0	0	0	0.059572	0	5.59357	0	0	0.03619	0	0	0	5.23032	0	0	0.015189	0	0
ENSG00000179933	C14orf119	18.9574	10.149	10.8199	7.84772	6.59283	5.00525	5.80148	19.1515	11.4618	15.4495	8.40904	8.11851	7.98285	5.26038	19.0831	13.1088	9.36748	9.48172	5.83914	5.28001
ENSG00000227051	C14orf132	2.95037	13.1413	10.3723	18.245	20.5645	2.32329	2.02853	3.61641	11.6847	10.8602	14.7937	17.7467	2.58255	1.80137	5.26389	10.065	12.4239	20.2299	2.22671	1.26037
ENSG00000156411	C14orf2	69.6645	115.02	135.344	70.2607	64.8613	24.5031	28.0117	98.0718	151.427	144.174	78.7639	84.2377	33.8836	33.9284	93.1743	191.792	78.3908	70.2167	23.9452	30.367
ENSG00000179476	C14orf28	1.53732	1.63904	2.28323	1.01117	1.27102	0.81293	0.249389	0.913344	2.1253	1.65722	1.54565	1.8254	0.500205	0.393435	1.17789	1.43113	1.72974	1.7278	0.465516	0.444126
ENSG00000139971	C14orf37	2.87161	2.1657	1.65261	4.66811	2.84252	1.43985	1.31156	4.96023	3.89613	3.78096	8.37514	3.56616	1.16189	1.02333	8.69866	1.84209	11.3643	4.99644	2.05953	1.29884
ENSG00000179008	C14orf39	0.081498	0.051235	0.060032	0.04622	0.049787	0.222834	0.073123	0.090651	0.020216	0.122568	0.015545	0.079671	0.10756	0.124364	0.080342	0.061215	0.015552	0.041925	0.223101	0.136923
ENSG00000100802	C14orf93	0.41576	0.419742	1.47854	0.427296	0.42191	0.243951	0.181805	0.374714	0.577276	0.643712	0.340693	0.2827	0.227859	0.159454	1.35268	1.04642	0.354495	0.491144	0.288024	0.162429
ENSG00000167173	C15orf39	0.87467	0.478706	0.311682	0.189792	0.180362	0.069077	0.199566	0.531479	0.352722	0.209857	0.041873	0.124051	0.10246	0.084887	1.00227	0.294878	0.028141	0.18476	0.064412	0
ENSG00000169609	C15orf40	1.44202	2.3956	1.97052	1.13234	1.5136	0.68939	0.314249	1.67522	1.23936	2.27554	0.604718	0.757151	0.60765	0.521358	1.68693	1.80891	1.25266	0.822896	0.642697	0.280384
ENSG00000186073	C15orf41	2.45905	4.06705	3.6328	0.463959	0.183908	0.257872	0.115741	0.172669	0.312435	4.23076	0.394469	2.23844	0.087827	0.086839	0.635143	1.59261	0.246259	6.10276	0.251699	0.103109
ENSG00000205363	C15orf59	0.260789	0.137444	0.114008	1.61298	2.26362	0.016527	0.043638	0.49639	0.29569	0.177127	1.51791	1.07762	0.19732	0.027522	0.180395	0.052712	0.667019	1.48507	0.073832	0.035197
ENSG00000189227	C15orf61	0.19348	1.26903	1.31225	1.57175	0.99635	0.395811	0.109096	0.270287	2.23692	3.92192	1.39854	1.29625	0.28497	0.119095	0.165605	0.61329	4.05344	1.05598	0.305095	0.32239
ENSG00000261652	C15orf65	0.846671	3.57599	3.65664	2.3159	2.63404	0.515385	0.600964	0.325115	4.03204	3.6934	2.88244	3.18598	1.26992	0.611664	1.09342	1.83474	3.5829	3.72988	0.092437	0.266151
ENSG00000166780	C16orf45	4.78402	6.88104	6.89649	6.60471	8.80964	2.01959	3.92984	4.35373	7.88798	5.47543	7.27149	8.97724	0.376105	0.264615	5.56745	2.93632	5.38091	8.17418	0.281336	0.172892
ENSG00000185716	C16orf52	5.03079	4.71004	0.373502	0.413065	0.377899	0.380501	0.172432	0.330519	0.332429	0.378442	0.494933	0.438672	0.211251	0.224395	0.314329	0.196797	0.516803	0.463692	0.465122	0.129816
ENSG00000140688	C16orf58	2.32584	1.87994	1.59095	0.573554	1.00345	0.365325	0.864713	2.02892	1.87832	0.979872	0.358915	0.825971	0.467067	0.3898	2.06112	0.567018	0.072027	0.776007	0.306959	0.222902
ENSG00000103544	C16orf62	11.4515	10.0396	4.65322	4.27467	4.51821	2.2517	2.08846	9.55974	9.54483	9.38213	4.77462	4.47819	2.69413	1.80886	9.23799	11.7245	3.18331	8.67716	2.70849	1.66042
ENSG00000125149	C16orf70	3.67134	4.45968	2.29772	2.73378	4.47648	1.02334	1.16057	4.63843	5.50262	4.39999	1.90818	2.26527	1.40603	0.983015	2.85323	2.45324	2.11438	3.9561	1.23723	1.13514
ENSG00000182831	C16orf72	29.0545	31.6654	24.9172	24.0393	32.2309	6.61389	4.94015	29.8453	26.0102	31.6355	28.7191	43.2145	9.65492	5.50478	29.9995	24.6713	44.186	53.4918	8.2058	4.94581
ENSG00000155330	C16orf87	10.5449	11.5611	8.73364	3.23637	3.45944	2.02515	1.01767	9.44333	7.04905	11.4654	3.80666	6.5527	0.905446	2.80102	9.31317	8.03257	5.34996	3.87824	1.95906	2.33682
ENSG00000174109	C16orf91	2.40695	3.77667	4.03199	1.31018	1.38943	0.421652	0.691032	3.24012	3.88762	3.62862	2.3444	3.28369	1.37355	0.522183	2.76316	5.14568	2.36493	2.00894	0.964572	0.46268
ENSG00000256806	C17orf100	0.221392	1.16201	1.07334	3.29292	3.63142	0.472356	0.52494	0.384955	0.843371	0.949143	4.0396	4.21108	0.529347	0.808584	0.550594	1.65857	3.58091	3.8147	0.274305	0.462749
ENSG00000212719	C17orf51	0.256179	1.44334	1.0953	1.00197	0.745165	0.180798	0.256775	0.564411	1.15422	1.15866	0.762273	0.820968	0.197339	0.29467	0.500097	1.33717	0.483354	0.949669	0.190392	0.182731
ENSG00000125319	C17orf53	2.3883	1.54995	0.932426	0.347507	0.042283	0.069793	0.193191	2.30837	1.21811	0.571455	0	0.141681	0.035773	0.029206	2.58981	1.14786	0.132041	0.197679	0.040174	0.07737
ENSG00000186665	C17orf58	4.24284	5.62727	4.22541	4.54647	1.73106	0.311976	0.578886	3.84136	3.72937	4.54805	5.55338	4.05614	1.36207	1.01591	3.9137	3.18061	4.53542	3.20825	0.804139	0.782047
ENSG00000178927	C17orf62	2.22949	2.15123	0.779061	0.607289	0.686499	0.201518	0.35357	1.83664	2.31146	0.6817	0.249899	0.334068	0.157009	0.142018	2.83512	1.71585	0.12256	0.36455	0.048584	0.092796
ENSG00000108666	C17orf75	15.3571	10.4215	7.45829	14.0131	15.9184	1.59592	0.998676	15.9815	11.8504	2.83928	8.14692	18.2049	1.29784	1.12716	17.2485	3.57826	6.65539	7.2623	0.973421	2.32396
ENSG00000141219	C17orf80	11.7752	11.832	11.9286	10.9683	10.3629	2.04521	2.90966	14.4674	12.1368	11.2525	18.1171	14.8577	4.75003	2.65513	13.7743	9.89283	8.06551	8.38306	3.85591	2.34701
ENSG00000187624	C17orf97	0.05301	0.178854	0.197304	0.397657	0.495003	0.225021	0.330401	0.082594	0.210386	0.412092	0.238888	0.247084	0.304247	0.564221	0.151204	0.133239	0.239841	0.934888	0.190053	0.150502
ENSG00000141428	C18orf21	9.68678	18.3678	22.8392	19.1244	15.6091	1.49364	1.29069	10.8279	21.4068	6.74687	20.537	6.30102	2.31477	1.70107	8.64129	6.01916	6.02924	11.6703	1.83972	6.12839
ENSG00000152242	C18orf25	4.94177	0.594059	0.425395	0.379423	0.336637	0.945039	0.22945	0.602956	0.446214	0.459649	0.412751	4.35332	0.293739	0.285154	0.509817	0.453225	0.458251	1.94171	0.491506	0.195043
ENSG00000177576	C18orf32	8.67309	21.1469	10.91	39.7486	23.8478	4.11705	4.51717	3.63384	9.7437	11.2124	63.0636	19.8165	5.34104	3.99036	7.18879	7.06724	26.1584	28.3476	4.17184	4.40344
ENSG00000166845	C18orf54	7.4814	6.24845	5.56018	1.17832	1.29994	0.87474	0.334655	9.46651	5.66723	6.85026	1.56121	1.33394	0.402308	0.485038	7.30239	2.73174	2.44132	2.86747	1.18338	0.357142
ENSG00000131943	C19orf12	1.67258	4.64521	4.81549	5.7198	5.2284	1.24815	0.968327	2.08663	4.82577	5.22615	7.08706	6.5075	1.34675	0.779096	1.97525	4.95392	5.7634	7.36558	1.3697	0.78299
ENSG00000119559	C19orf25	0.821033	0.492107	0.666377	0.162423	0.378388	0.133716	0.042011	1.13529	0.534879	0.24378	0.035463	0.10672	0.091822	0.080443	1.15014	0.213623	0	0.225512	0.066714	0.066591
ENSG00000105072	C19orf44	0.444177	0.656317	0.428892	0.224703	0.439063	0.122369	0.144424	0.191844	0.410196	0.487905	0.177055	0.312623	0.297315	0.114046	0.372373	0.737148	0.26063	0.323381	0.054886	0.183801
ENSG00000160392	C19orf47	0.44021	0.45789	0.209873	0.024069	0.179604	0.000441	0.061054	0.342757	0.260671	0.260119	0.108295	0.086682	0.043665	0	0.363217	0.397933	0.02722	0.097675	0	0.06776
ENSG00000167747	C19orf48	8.49216	3.28807	2.18271	0.412699	0.97699	0.457924	0.633519	7.67032	3.68815	1.32495	0.379222	0.611419	0.190996	0.507913	7.62158	1.74491	0.040593	0.395303	0.203719	0.248613
ENSG00000104979	C19orf53	11.8179	7.40471	6.0744	4.82635	6.14598	1.94333	3.68001	22.4167	10.7613	5.49549	2.20975	3.14907	2.48202	2.93165	15.5128	5.83911	0.919167	1.9144	1.47648	0.887756
ENSG00000188493	C19orf54	1.15271	0.883727	0.520701	0.393619	0.411878	0.216381	0.176086	1.28406	0.944975	0.230899	0.405391	0.338594	0.056448	0.205911	0.714706	0.869556	0.207102	0.447702	0.182781	0.167445
ENSG00000130813	C19orf66	2.76524	0.060652	0.153979	0.188366	0.346997	0.810065	0.787516	2.91251	0.251383	0.142387	0	0.1939	1.33295	1.26577	2.73806	0.20935	0.561264	0.525933	0.973159	0.824111
ENSG00000197223	C1D	7.13311	7.2685	11.6375	8.35072	6.56791	2.33782	2.84814	9.39798	6.93073	7.54555	5.70842	4.76819	4.7676	2.66256	9.40571	3.67916	7.5054	6.41585	2.24134	2.19999
ENSG00000106392	C1GALT1	21.628	11.9933	7.69494	6.28529	6.48279	6.80664	4.96144	23.9204	9.11826	12.392	7.682	7.56324	5.5044	4.25332	19.564	7.99563	8.28309	5.15228	6.70186	3.85779
ENSG00000171155	C1GALT1C1	8.10879	14.5564	15.0844	11.562	8.00412	4.88177	4.50525	8.4823	14.9116	21.3026	16.4148	11.9045	6.07881	4.69801	9.62064	18.0546	18.1554	14.9555	8.10317	5.20671
ENSG00000163362	C1orf106	2.14633	2.18528	1.90736	0.388617	0.404069	0.259359	0.136058	2.08141	2.49	1.73786	0.216234	0.419203	0.306088	0.149203	2.19923	2.07962	0.397102	0.45913	0.225197	0.148641
ENSG00000116922	C1orf109	5.81757	8.85297	5.80564	2.43629	2.038	1.44629	1.48856	6.7237	7.52748	7.17768	1.96503	2.43666	2.04354	1.09799	5.59124	6.14162	2.05057	2.33523	1.16941	1.19274
ENSG00000000460	C1orf112	4.0847	7.2065	5.41126	0.864984	0.711157	0.546032	0.347425	3.75521	6.84539	6.21972	0.786389	1.95452	0.553972	1.22426	4.45828	7.38915	1.0043	1.06136	0.751417	0.370503
ENSG00000162817	C1orf115	2.47423	0.557646	0.438388	0.424378	0.477326	0.445591	1.15067	2.80039	0.776951	0.883916	0.154302	0.907345	0.619005	1.20964	2.67856	1.11316	0.582052	0.660277	0.461947	0.578016
ENSG00000182795	C1orf116	0.39208	0.145412	0.022929	0.310166	0.22933	0.524473	0.108014	0.285268	0.018717	0.021203	0.167444	0.309525	0.621334	0.161466	0.250289	0.094459	0.168589	0.512622	0.382439	0.211284
ENSG00000197982	C1orf122	2.01239	3.31881	4.53339	2.37774	2.74324	0.824848	1.10382	3.39022	4.29091	3.44644	1.80524	2.12909	1.28328	1.18577	3.76216	3.58345	1.44636	2.02284	0.903653	0.456572
ENSG00000162384	C1orf123	10.1957	15.5926	15.7985	4.11243	4.60334	2.60577	2.4905	13.5704	17.7638	18.0402	3.56033	4.02905	2.52065	2.77261	13.1748	19.1894	3.60767	3.86563	1.93734	1.7368
ENSG00000143633	C1orf131	5.52712	9.75246	10.2254	7.31039	4.1962	2.30782	2.83897	5.59034	10.4	8.93308	2.4447	8.00817	3.23632	1.56338	3.76287	9.83365	3.36303	7.18814	1.81728	1.29796
ENSG00000198912	C1orf174	2.94716	3.29856	4.07048	2.02477	1.24137	1.12725	0.906412	3.36604	4.467	3.90973	1.80352	1.69748	1.06747	1.04189	3.16812	3.02197	1.50638	1.93823	1.19126	0.526962
ENSG00000119280	C1orf198	8.12466	20.2719	11.291	9.53561	9.36103	2.62996	1.93529	6.03272	14.0422	12.8368	7.58595	11.9055	5.38428	2.75537	5.18264	9.85852	10.6394	11.092	3.79615	2.95444
ENSG00000116667	C1orf21	4.3595	5.74649	6.58035	1.60634	2.12197	0.421318	0.226215	4.6421	7.02358	7.20574	1.92	2.41786	0.418417	0.257585	5.04865	1.29975	1.88864	2.91728	0.44561	0.237696
ENSG00000253313	C1orf210	3.15479	0.454318	0.739798	0.433418	0.500379	0.2852	0.195035	2.78919	0.537317	0	0.25946	0.348605	0.278014	0.059073	2.55234	0.794255	0.086666	0.153936	0	0.075162
ENSG00000142686	C1orf216	1.83946	2.46535	1.53759	6.81987	5.67747	0.416402	0.573844	1.7009	1.67963	2.40358	6.54361	7.02546	0.383024	0.396817	1.57934	1.66891	4.51684	6.77943	0.70457	0.446244
ENSG00000239887	C1orf226	1.73058	0.516133	0.461132	0.03643	0.158453	0.313254	0.192145	1.58899	0.311674	0.099257	0.05432	0.218276	0.253908	0.222238	1.93091	0.350013	0.09078	0.165167	0.234798	0.170574
ENSG00000143793	C1orf35	0.631728	0.59198	0.43165	0.121352	0.23186	0.074898	0.044007	0.563905	0.42478	0.161937	0.091911	0.024585	0.046941	0.041576	0.383175	0.390983	0	0.082897	0.028303	0.053701
ENSG00000143612	C1orf43	50.3881	54.5267	56.3957	51.5778	32.0932	10.3166	19.7871	58.4117	61.0229	61.5498	54.7407	46.8949	22.7761	19.2478	58.5605	60.2768	37.0289	59.4617	12.582	16.0608
ENSG00000164008	C1orf50	0.730236	1.65741	1.19681	2.11187	1.91746	0.371577	0.300449	0.755656	1.42682	1.24999	2.37143	2.0211	0.681015	0.331344	0.852721	1.30876	1.75604	2.4651	0.685093	0.328947
ENSG00000162642	C1orf52	13.4467	9.71397	10.876	9.00863	12.5014	3.28081	3.77269	11.6186	12.5214	9.72169	25.051	12.447	2.3552	1.90055	9.82901	3.74803	8.35259	11.8213	2.24679	1.55557
ENSG00000118292	C1orf54	8.52767	13.9409	11.4845	0.474773	1.66765	7.49681	5.7156	11.0728	12.1652	16.3133	0.195388	1.5215	11.0227	4.89253	11.2862	15.7916	1.07948	1.05474	7.97235	5.78875
ENSG00000143443	C1orf56	0.318884	0.722109	1.08502	1.04251	0.744717	0.185023	0.528024	0.651077	0.795654	0.571922	0.377818	0.512959	0.656118	0.64731	0.428382	0.700512	0.511787	0.64042	0.263416	0.294285
ENSG00000162757	C1orf74	2.01834	1.68112	1.79175	0.529661	0.892204	0.440408	0.525544	2.5172	2.04817	2.1165	0.841427	0.934275	0.798463	0.44357	1.71869	2.09826	0.957618	0.808227	0.59201	0.442796
ENSG00000142698	C1orf94	0.168807	0	0	0	0	0.015024	0	0.142673	0	0	0.005964	0	0	0	0.195099	0	0	0	0	0
ENSG00000108561	C1QBP	150.782	93.5634	109.456	24.1381	44.3312	8.17658	18.5603	182.205	127.46	119.202	42.2597	51.7439	22.1068	17.2107	187.154	131.369	48.2419	50.8487	10.5727	17.1334
ENSG00000165985	C1QL3	0.836306	0.320922	0.131065	2.53365	4.33905	0.827465	0.359743	0.384273	0.325504	0.189051	2.34937	4.028	0.943495	0.543151	0.814056	0	3.67014	3.01487	0.890037	0.2747
ENSG00000186897	C1QL4	0.098361	0.04799	0.060916	2.44309	3.68653	0	0	0	0	0	2.46654	1.46973	0.051391	0	0	0	1.20093	2.61505	0	0
ENSG00000082196	C1QTNF3	0.586431	1.2946	1.95548	0.840813	1.78735	0.889098	0.13405	0.029832	1.70262	1.80039	2.09204	1.83898	1.04388	0.277982	0.112006	2.24856	2.11964	1.39379	0.654922	0.097524
ENSG00000133466	C1QTNF6	0.168042	0.441808	0.342836	0.040117	0.148832	0.278863	0.339041	0.189085	0.304369	0.22073	0.089663	0.081807	0.359049	0.144867	0.226649	0.240905	0.072802	0.197274	0.272719	0.193604
ENSG00000159403	C1R	0.630918	0.28018	0.20218	0.04643	0.149931	2.65147	1.10838	0.851753	0.402515	0.249278	0.04654	0.188589	1.92034	1.03828	0.628379	0.066227	0.115819	0.104521	1.93821	1.60261
ENSG00000139178	C1RL	2.19218	2.05178	1.15704	1.08716	1.3959	1.75403	1.14652	1.91844	1.43182	1.37774	0.815874	0.761447	1.85933	1.01494	2.24421	1.41221	0.949772	1.00439	1.7587	0.96961
ENSG00000205885	C1RL-AS1	0.221507	0.303236	0.102463	0.140538	0.119399	0.449619	0.10642	0.55864	0.131887	0.179319	0.114556	0.250547	0.140737	0.172162	0.207362	0.097401	0.071081	0.095648	0.405323	0.015452
ENSG00000182326	C1S	2.94137	0.872791	0.614636	0.028784	0.051333	11.3722	3.93167	3.38891	0.413354	0.800349	0.055149	0.094424	14.4185	5.61353	3.8569	0.375	0.28181	0.322631	13.8494	9.19729
ENSG00000088854	C20orf194	1.46107	3.07325	2.81195	7.85814	8.19293	1.52009	1.02072	1.90735	3.44286	3.18227	9.01722	8.97033	1.55364	0.938699	1.71147	3.36942	7.69581	9.88923	1.69326	0.733087
ENSG00000171984	C20orf196	1.6732	1.58743	2.42974	0.950578	1.76155	0.698274	0.174298	4.3911	2.4426	2.9723	0.848408	1.18976	0.315167	0.157853	3.21864	2.42873	0.598258	1.26657	0.700072	0.203551
ENSG00000101084	C20orf24	31.8317	32.2982	31.3966	19.4443	17.418	6.84453	10.8367	45.6385	40.836	36.9192	20.1577	18.7281	12.9999	12.1979	43.0114	32.0691	22.7364	16.2143	7.87544	9.43093
ENSG00000101220	C20orf27	2.99469	1.79636	2.16791	0.542531	1.26946	0.216442	0.162699	4.08361	1.4629	0.836177	0.490245	0.440738	0.345517	0.298146	2.90462	1.47872	0	0.437287	0.04449	0.087693
ENSG00000196476	C20orf96	1.77093	1.12946	1.80393	0.76187	1.33944	0.691947	0.686475	1.81816	1.6072	1.20975	0.640548	1.19652	0.497705	0.340103	1.12581	1.49661	0.685784	1.29853	0.65734	0.200921
ENSG00000160298	C21orf58	0.727049	0.919251	0.543317	0.135153	0.321897	0.150958	0.157833	0.541722	0.712626	0.526338	0.049418	0.151241	0.120148	0.094526	0.474913	0.735465	0.042518	0.042133	0.126059	0.064966
ENSG00000159079	C21orf59	21.8106	14.2984	18.3415	11.6355	6.65303	3.04274	8.65937	39.7817	17.9349	18.7988	12.0107	13.4482	7.11331	5.66948	23.0916	22.2055	13.9377	12.8768	2.46285	4.08123
ENSG00000154642	C21orf91	8.09442	9.46934	7.41765	4.3071	4.50217	2.8797	3.49046	8.45094	9.38023	9.98012	5.84267	4.35661	2.51492	3.07691	7.47232	5.06123	10.3172	5.2693	3.34739	2.50777
ENSG00000242259	C22orf39	3.58593	4.1081	3.65454	3.35605	3.53778	1.15137	1.08924	4.38338	4.24036	4.05225	3.27236	3.39004	0.985224	0.904139	3.58103	3.0993	2.83104	3.64888	0.983847	0.577441
ENSG00000184208	C22orf46	0.880264	1.11781	1.13558	0.53871	0.663506	0.485711	0.256197	0.746928	1.11657	0.98552	0.389514	0.729721	0.321426	0.169184	0.541282	1.05207	0.443526	0.82113	0.113692	0.10861
ENSG00000157617	C2CD2	1.6068	2.13844	1.47762	0.511869	0.668795	0.717631	0.478732	1.40925	1.76409	2.56432	0.624942	0.676398	0.54181	0.64628	1.48388	1.51823	0.600021	0.788153	0.600255	0.365519
ENSG00000172375	C2CD2L	0.068837	0.269546	0.186918	0.176598	0.285804	0.203468	0.238027	0.159769	0.13001	0.273407	0.189942	0.391222	0.166051	0.381992	0.124397	0.06686	0.099498	0.259884	0.102191	0.048771
ENSG00000168014	C2CD3	3.97651	2.51462	3.21849	2.1942	4.9509	2.50085	1.04978	1.85459	5.56496	3.98802	1.12616	3.62152	0.506967	0.543562	2.65054	1.38768	2.04965	3.59454	0.679524	0.385164
ENSG00000198535	C2CD4A	0	0	0	0.076064	0.073398	1.6222	0.373246	0	0	0	0	0.152177	2.59081	0.741397	0	0	0.115176	0.034213	2.25639	1.10821
ENSG00000205502	C2CD4B	0	0	0	0	0	0.549005	0.364553	0	0	0	0	0	1.76734	0.400418	0	0	0	0	0.993908	0.733299
ENSG00000183186	C2CD4C	0.78806	0.217258	0.156839	0	0.155993	0.03128	0.063101	0.700771	0.132305	0.112595	0	0	0.034014	0.083287	0.56526	0.428122	0	0.075712	0	0.073568
ENSG00000111731	C2CD5	13.9149	13.7961	12.2316	18.8019	13.6667	3.97949	3.52521	14.6908	13.0548	10.1276	17.0446	16.5819	3.47056	2.36862	13.3012	12.2039	21.383	16.4177	6.949	2.71023
ENSG00000273045	C2orf15	2.61677	1.64634	1.90571	1.97941	1.77966	0.605948	0.419514	3.10132	2.7336	2.23039	1.82438	1.42103	0.922271	0.623216	3.22033	1.39474	4.06473	0.916831	0.515961	1.3693
ENSG00000115998	C2orf42	1.767	4.31074	3.96926	3.4557	2.09366	0.824174	0.629529	3.20707	4.10004	2.19141	2.17293	2.03718	0.94271	1.20422	3.6202	5.03765	2.63279	2.73432	0.767088	0.482984
ENSG00000135974	C2orf49	5.30257	9.85204	9.61909	7.50567	6.21602	3.56608	3.01067	5.62022	9.33338	9.76652	7.48602	8.66191	3.72915	3.15152	6.3748	12.6887	9.75898	8.89096	4.07284	2.78317
ENSG00000172478	C2orf54	0	0.035854	0	0.284536	0.137055	0.507502	0.166197	0	0.074672	0	0.094756	0.113856	0.464582	0.097568	0	0	0.047397	0.041669	0.345354	0
ENSG00000168887	C2orf68	6.87979	8.4554	5.21579	2.22984	2.79337	1.41211	1.41124	4.67293	8.55521	4.79801	2.58454	2.99222	1.74009	1.93516	9.5877	5.84374	2.72029	3.32407	1.97947	1.18201
ENSG00000178074	C2orf69	17.4684	13.0728	12.6532	13.1555	8.68419	4.37021	5.25326	16.9181	10.706	10.757	13.8217	11.4667	3.54425	3.81235	16.0423	7.12602	12.3198	11.4451	3.94509	2.89244
ENSG00000204128	C2orf72	0.265011	0.102973	0.065846	0.795249	0.583757	0.550194	0.180084	0.193636	0.188258	0.121778	0.101461	0.499154	0.40544	0.211156	0.232474	0.134066	0.203338	0.273002	0.498748	0.11955
ENSG00000186132	C2orf76	4.34549	6.68668	11.304	2.46521	3.145	0.616939	0.822232	4.70813	12.0755	11.3084	4.93319	5.20226	2.51751	1.6742	3.73433	3.04829	5.0756	5.36655	0.869673	0.736642
ENSG00000188674	C2orf80	0.420102	0.040867	0.161506	3.11875	1.97099	0.045593	0	0.13074	0	0.049453	9.27136	2.54199	0.087978	0	0.207615	0	3.78338	3.89073	0	0
ENSG00000187699	C2orf88	0.004171	0.009072	0.024458	0.009376	0.008958	0.037396	0.011028	0.004142	0.011257	0.016722	0.014777	0.005449	0.013141	0.012891	0.00357	0.00353	0.020211	0.012115	0.013466	0.007082
ENSG00000125730	C3	0.946411	0	0.0153	0	0	3.05911	1.59646	2.19727	0	0.014148	0	0.012845	1.7962	1.17572	2.58684	0	0	0	1.64725	1.51321
ENSG00000114405	C3orf14	11.3683	29.0034	30.6781	15.2418	12.7343	1.55944	0.643042	13.5629	32.9477	34.8751	18.6877	18.6834	4.80204	4.28633	14.3001	10.3554	22.2406	18.4228	5.509	2.93845
ENSG00000088543	C3orf18	1.36698	1.14043	1.54394	0.765038	1.148	0.328157	0.406772	0.784686	1.22067	0.7029	0.589016	0.58954	0.449581	0.325355	1.08616	0.572975	0.360824	0.612173	0.144955	0.057407
ENSG00000174928	C3orf33	1.80914	2.22618	2.48914	1.77776	0.893688	0.903165	0.693227	1.49573	2.43166	3.04002	2.21797	2.19857	1.10421	0.38147	1.89272	1.62279	2.03111	1.92424	0.685636	0.907187
ENSG00000198590	C3orf35	0.04193	0.094469	0.064162	0.059137	0.107471	0.18576	0.086888	0.052702	0.077642	0.095813	0.063228	0.059324	0.063713	0.104204	0.01867	0.062716	0.064655	0.046821	0.266168	0.033461
ENSG00000179021	C3orf38	14.5889	19.0167	16.6037	12.6323	11.8084	2.34384	1.9008	13.2473	20.9245	25.0895	12.9622	8.54023	4.5404	1.83433	14.8852	16.4124	8.82832	7.88579	2.28075	1.88997
ENSG00000114529	C3orf52	3.51237	0.862787	0.57191	0.495026	0.552063	0.552886	0.270488	4.62577	0.474305	0.874098	0.400177	2.39206	0.479713	0.351342	3.38691	0.758429	0.662257	0.428232	0.659945	0.365642
ENSG00000181744	C3orf58	11.2733	8.72217	9.43884	9.05606	6.62314	2.37656	1.87294	7.6905	6.54631	14.5486	2.62397	2.91825	2.5534	1.6332	10.7657	2.63336	6.01334	2.79545	2.71553	1.56167
ENSG00000188315	C3orf62	0.509366	1.22467	0.618333	0.718887	1.04339	0.665489	0.518384	0.526464	0.776041	0.950418	0.878767	1.13833	0.484643	0.588829	0.57306	1.76198	1.15644	1.0601	0.554572	0.18055
ENSG00000163689	C3orf67	0.152052	0.163145	0.197695	0.124139	0.144921	0.134531	0.063044	0.71792	1.51088	0.158982	0.389985	0.15163	0.053637	0.0533	0.127275	0.147534	0.177299	0.153503	0.117992	0.037953
ENSG00000187068	C3orf70	1.12847	7.53792	5.18224	4.70399	4.45086	0.673279	0.585785	0.956522	6.52852	5.21002	5.11041	4.30706	0.523049	0.335396	0.944716	3.66037	4.28354	5.18286	0.694748	0.274627
ENSG00000180044	C3orf80	0.075695	1.39462	0.51196	0.339114	0.140241	0.199832	0.036502	0.078497	0.42018	0.794038	0.333666	0.354198	0.276847	0.099506	0.144081	0.25495	0.339339	0.166949	0.35799	0
ENSG00000154274	C4orf19	0.038897	0.246988	0.250848	0.451521	0.400012	0.528763	0.214211	0.043845	0.273445	0.244554	0.249169	0.44374	0.522363	0.300376	0.069278	0.227605	0.165981	0.551394	0.529024	0.399266
ENSG00000164096	C4orf3	18.9876	44.4167	47.535	38.3507	33.1863	13.3614	12.7019	25.8708	63.4829	49.238	41.7847	43.834	19.738	11.0559	21.0676	26.6282	42.1463	39.4345	13.7891	9.43174
ENSG00000151470	C4orf33	1.37074	1.96016	2.50136	1.2737	2.08847	0.362099	0.301582	3.5759	1.87772	2.63082	2.28277	4.0602	0.6923	0.494693	0.378748	5.99032	3.87475	2.97209	0.427035	0.243551
ENSG00000163633	C4orf36	0.730727	0.459	0.844787	0.424195	0.064169	0.310243	0.072816	0.544389	0.464261	0.294324	0.072172	0.058687	0.190601	0.082983	0.813506	0.377664	0.121743	0.107482	0.043858	0.170006
ENSG00000205208	C4orf46	22.5887	19.4581	15.3964	11.5396	6.59658	2.63923	1.98887	14.7835	15.8997	19.4192	8.18366	9.28107	2.61285	1.8697	14.8744	13.2546	9.6403	9.39738	2.73064	1.36543
ENSG00000205129	C4orf47	0.490619	0.291756	0.100667	0.381755	0.546116	1.62905	2.29108	1.24952	0.588026	0.515828	0.382659	0.468293	1.12976	1.73276	0.361441	0.62155	0.74349	0.261437	0.996882	2.36177
ENSG00000181215	C4orf50	0.021826	0.019549	0.040264	0.100369	0.073253	0.01366	0.006398	0.012659	0.04722	0.037688	0.068688	0.097403	0.04194	0.005833	0.006523	0.044911	0.068975	0.138489	0.007942	0
ENSG00000106804	C5	0.124454	1.51641	1.16321	0.617578	0.628104	0.327593	0.618706	0.068335	1.30626	2.00158	1.01087	0.974965	0.691437	0.313466	0.099432	2.6298	0.989488	0.887993	0.403438	0.427417
ENSG00000113583	C5orf15	27.0315	33.8573	34.6705	19.8127	21.0886	14.7327	17.7559	29.0749	28.5996	27.8195	17.9172	21.4495	20.6079	16.4203	23.955	20.2819	21.7638	17.4547	20.0128	13.805
ENSG00000082213	C5orf22	10.2466	16.8163	12.472	13.7568	9.20755	3.39395	3.30753	9.37849	13.605	14.9405	15.3714	14.6216	2.84909	2.70516	12.983	13.4797	18.2408	14.8451	3.82086	2.54783
ENSG00000181904	C5orf24	1.91777	11.9738	7.71869	8.48677	13.8736	10.5478	2.95907	4.54923	13.8222	6.64725	8.90677	6.6045	10.4089	2.47905	4.49959	3.99283	13.9587	7.44965	7.04332	2.15983
ENSG00000181751	C5orf30	2.21783	2.67664	2.1035	10.5505	2.51993	0.528388	0.553776	7.88592	1.99846	5.86868	3.75648	3.22274	0.864346	0.598027	7.09785	1.96834	3.53221	9.52312	0.769888	0.383193
ENSG00000172244	C5orf34	5.65085	6.48587	6.21437	0.88587	0.421144	0.574022	0.54498	5.87848	5.53974	9.78544	0.498668	0.779981	1.13647	0.708173	5.23279	6.20053	1.54713	0.780137	0.799064	0.695324
ENSG00000197603	C5orf42	3.35256	7.49787	6.26386	8.20526	7.85754	4.75218	4.54349	3.7849	9.84369	9.22418	11.003	11.2818	5.28719	4.20264	3.42662	8.15645	10.4145	13.7954	7.50613	3.35927
ENSG00000215217	C5orf49	0	0.20294	0.3708	0.825672	0.418806	0.772489	1.687	0.134186	0.348448	0.148208	0.822421	0.621242	0.938471	1.57707	0	0.072636	0.490835	0.738307	0.659034	1.36669
ENSG00000205765	C5orf51	10.3415	15.0506	10.5151	11.3775	9.34346	4.95392	1.41108	7.58061	10.6239	11.5217	9.7349	9.73442	2.0237	3.1953	6.66278	9.54263	8.62943	12.0366	4.94173	1.66201
ENSG00000234511	C5orf58	0.012509	0.185774	0.510969	5.20997	4.30123	0.590626	0.025543	0.001006	0.216051	1.17225	10.7797	5.28157	1.3503	1.34117	0.49327	0.038562	8.81043	6.24027	1.81462	0.009863
ENSG00000164241	C5orf63	0.215153	0.418519	0.72285	0.284712	0.311778	0.174365	0.078079	1.11104	0.394077	0.60028	0.659731	0.426607	0.12257	0.094794	0.221458	0.428582	0.26539	0.428147	0.048612	0.030495
ENSG00000039537	C6	0	0	0	0.034798	0.058128	0.214082	0.143613	0	0	0	0	0.021522	0.238402	0.114234	0	0	0.035597	0.015888	0.246891	0.186875
ENSG00000196821	C6orf106	18.3513	7.45863	7.72531	5.35198	5.8147	5.0306	3.33067	21.8144	7.90237	6.1187	5.21855	4.90017	5.8691	3.53772	22.039	8.13666	4.64452	5.76049	4.5579	3.34657
ENSG00000112539	C6orf118	0	0.833247	0.88044	0.839862	0.612628	0.373075	0.984139	0.126275	1.21129	0.403099	0.235687	1.00437	0.611638	0.349426	0	0.905496	1.11779	0.518278	0.786847	0.567265
ENSG00000185127	C6orf120	13.4665	16.515	15.2478	10.2213	9.2494	7.18614	8.36779	15.0946	16.5961	17.8169	12.3818	11.9432	11.0129	7.98072	12.8716	13.7086	15.5751	11.4256	9.83336	7.66323
ENSG00000188112	C6orf132	4.07123	0.079807	0.043894	0.060679	0.129134	0.061087	0.04572	4.7058	0.03583	0.054164	0.045617	0.036971	0.048679	0.041476	2.96322	0.03972	0.046015	0.068437	0.027956	0.040046
ENSG00000204564	C6orf136	1.08929	0.663513	0.759442	0.909811	0.958543	0.248824	0.310074	2.26043	1.30244	0.759145	0.481375	0.193015	0.602799	0.584098	1.41299	0.709931	0.318848	1.44239	1.01176	0.140566
ENSG00000197261	C6orf141	2.34623	0.066126	0.189253	0.141761	0.08242	1.30651	0.399429	1.53889	0.113005	0.19319	0.029444	0.90825	1.51781	0.220463	2.07644	1.28128	0.953551	0.152495	0.994249	0.261312
ENSG00000203872	C6orf163	0.133752	0.50508	0.851714	0.196995	0.15312	0.452339	0.09956	0.717947	0.336832	0.351611	0.181131	0.149985	0.286551	1.06853	0.386325	0.307998	0.176183	0.189823	0.806701	0.093884
ENSG00000130349	C6orf203	11.4723	14.0703	14.555	6.77382	4.13423	2.15511	1.59045	6.56887	8.9278	10.9762	6.70655	7.78428	2.04865	1.63715	5.01341	8.36233	8.05869	4.94576	3.37288	3.05388
ENSG00000204439	C6orf47	3.4605	5.11989	3.61853	2.26184	2.89213	0.949075	1.70107	4.13718	3.54001	4.05832	2.02907	3.29365	1.33308	1.57726	3.97851	2.64873	1.22254	3.50777	0.728719	0.638965
ENSG00000204387	C6orf48	29.6875	34.8526	33.479	33.0819	28.3174	27.2354	35.7911	32.8811	35.8369	38.8038	34.1743	35.2409	40.2796	28.5895	34.709	37.8584	27.7491	32.5438	32.1744	25.2291
ENSG00000137434	C6orf52	0.349108	1.57174	1.25015	1.45707	1.34623	0.368649	0.552266	0.682242	2.23084	2.36221	1.03478	3.2067	0.359988	0.716239	0.762633	3.52747	1.32128	0.687974	0	1.04942
ENSG00000112308	C6orf62	39.2892	38.4508	37.2774	37.2231	34.6846	10.1072	9.68175	40.1541	34.4819	39.5271	43.7725	39.872	11.3719	9.01163	39.866	25.9659	49.1793	47.3566	11.6819	8.70845
ENSG00000198663	C6orf89	0.871339	8.257	3.58942	1.88416	6.23684	1.37459	1.08029	1.06121	8.39511	6.66072	1.97632	2.14601	1.66993	1.31225	1.62932	2.30661	1.7297	3.02959	1.44703	1.04151
ENSG00000112936	C7	0.078198	0.177979	0	2.37039	2.43003	50.832	45.3723	0.081294	0	0.022336	1.78534	2.92758	74.8899	37.0191	0.035876	0	3.02729	1.0921	70.0044	62.3555
ENSG00000182648	C7orf13	0.380463	1.87417	0.355797	2.23041	0.45575	0.774574	0.822665	1.66969	3.02795	2.1305	3.27648	3.15056	0.445012	0.535914	1.43108	1.99905	2.34793	3.1627	0.707308	0.410153
ENSG00000146576	C7orf26	1.26347	1.10251	0.964718	0.475968	2.48458	0.872852	0.215925	1.68508	2.26783	1.04208	0.558725	0.656022	0.430055	0.291114	0.887987	0.797513	0.258805	0.72295	0.2397	0.359058
ENSG00000153790	C7orf31	0.292523	0.622944	0.699995	1.08081	0.656869	0.802515	0.460814	0.194067	0.781542	0.920929	0.876294	0.80432	0.670432	0.679658	0.260968	0.361194	0.760507	1.52621	0.762337	0.388158
ENSG00000146826	C7orf43	1.7717	0.376782	0.878794	0.518968	1.25211	0.417528	0.429597	0.881548	0.717054	0.914431	0.321175	0.13991	0.19586	0.138391	0.810789	1.90831	0.054087	0.863717	0.185997	0.32654
ENSG00000122783	C7orf49	6.33485	10.5371	3.37214	2.30957	2.21974	1.36406	3.07955	8.82706	10.6029	8.54602	1.97237	3.70948	0.867274	0.722506	6.33932	2.70225	1.1984	1.42914	0.823529	0.483082
ENSG00000146540	C7orf50	0.097234	0.078024	0.077045	0.021576	0.04134	0.081788	0.038596	1.29477	0.072026	0.047812	0.011826	0.018831	0.023345	0.037931	0.752195	0.034653	0.00923	0.017692	0.031168	0.011346
ENSG00000164746	C7orf57	0.135206	0	0	0.230367	0.275931	0.332351	0.652421	0.279956	0.045266	0.102557	0.058016	0.093572	0.236254	0.594017	0.043579	0	0	0.051808	0.318386	0.203887
ENSG00000177335	C8orf31	0.21038	0.339657	0.628414	0.128633	0.285617	0.075276	0.095916	0	0.756593	0.42856	0.341753	0.28493	0.10029	0.030881	0.131671	0.575646	0.07177	0.282886	0.041628	0.039689
ENSG00000182307	C8orf33	14.3425	19.0849	13.7382	7.72058	7.01068	2.81905	5.4622	16.2866	18.2058	15.6758	5.28746	6.69563	4.17691	3.92023	14.6117	13.1783	5.66457	7.01032	3.48656	3.41987
ENSG00000165084	C8orf34	0.035235	0.553551	1.10463	1.40024	0.956847	0.112107	0.040443	0.019713	3.18561	0.198141	1.09916	1.06784	0.200882	0.05828	0.024679	0.60899	0.958436	0.113127	0.082681	0.035771
ENSG00000248801	C8orf34-AS1	0.122904	0.671891	1.03548	0.440016	0.69889	0.324459	0.118533	0.182977	1.07123	1.05648	0.548784	0.506768	0	0.162099	0.119634	0.206975	0.817036	1.32566	0.072837	0
ENSG00000156172	C8orf37	1.13583	2.59078	3.35976	2.30747	1.71155	1.06618	1.87798	1.11388	2.69311	2.86679	1.93116	1.80178	1.22138	1.70407	1.4458	2.21271	2.56662	2.16705	1.96761	1.55557
ENSG00000213865	C8orf44	0.71554	0.752519	1.35326	1.56224	1.44341	0.967072	1.13381	0.927621	1.36531	1.3763	1.41167	1.34198	0.446904	0.548205	0.678448	1.0974	1.81812	1.1504	1.00893	0.618588
ENSG00000169085	C8orf46	0.006355	0.04639	0.102317	0	0.028709	0.049664	0.33063	0.01393	0.049932	0.060147	0.029612	0.206912	0.006537	0.013852	0.005864	0.040529	0.042853	0.026822	0.031491	0.022472
ENSG00000164743	C8orf48	0.900809	1.30406	2.45067	2.09493	1.49219	0.748035	0.617932	0.369129	1.49802	2.67226	2.90566	1.40283	0.966352	1.25067	0.554374	1.96925	2.2831	1.70554	1.18048	1.1908
ENSG00000241852	C8orf58	0.492271	1.31825	1.34035	0.741091	1.07838	0.057695	0.423121	0.875532	0.991049	1.01995	1.18402	0.621545	0.30505	0.192877	1.09241	1.77657	0.489845	1.12118	0.388873	0.296113
ENSG00000176731	C8orf59	44.4671	46.9766	53.3319	31.9414	20.1402	12.5468	9.8172	44.6707	56.9854	56.0257	27.718	28.5097	17.6142	11.3742	62.9707	47.3488	39.0531	23.2882	12.5619	19.0821
ENSG00000189376	C8orf76	11.1067	11.5472	14.6709	4.79257	7.29656	2.34845	3.88209	13.0405	14.1468	14.4233	10.1502	8.88631	4.48049	3.23719	10.2191	10.4379	6.6529	9.47423	2.26964	3.90442
ENSG00000213563	C8orf82	2.14602	0.774646	0.5434	0.949995	0.586846	0.129435	0.126675	1.62034	0.829788	0.444917	0.202457	0.449388	0.267589	0.12193	1.26654	0.47313	0.08581	0.633694	0.080857	0.07709
ENSG00000253250	C8orf88	22.5362	14.5277	17.894	0.876421	1.97706	6.40627	6.06906	25.3369	11.7684	16.0021	0.999818	1.89309	8.04664	6.4637	26.7967	12.4306	1.48139	1.21686	6.5823	7.03265
ENSG00000160345	C9orf116	1.49319	3.49835	2.15337	0.448106	1.28267	0.581581	2.89756	3.06695	3.99623	0.745165	0.483375	0.139734	0.155449	1.25542	2.41414	2.4079	0.257781	0.336831	0.415531	0.413
ENSG00000204711	C9orf135	37.8712	1.0195	0.19826	0.719631	0.691458	2.86783	2.51911	57.1451	1.45815	1.72448	0.824528	0.500975	2.54139	3.39096	55.0612	1.56771	0.751945	1.48222	2.07747	3.68355
ENSG00000171159	C9orf16	2.00903	1.49861	0.848846	0.221989	1.41215	0.632895	0.854637	1.59602	1.73455	0.689472	0.631463	0.405377	1.28653	0.516266	1.47389	0.975755	0.068776	0	0.36536	0.069252
ENSG00000148120	C9orf3	0.118876	0.123352	0.129457	0.095292	0.119942	0.85081	0.152522	0.101084	0.155349	0.125078	0.088402	0.099373	0.199613	0.428737	0.102041	0.161283	0.084499	0.084745	0.381342	0.073183
ENSG00000135045	C9orf40	4.87857	4.9014	5.3233	1.95582	2.77063	1.62208	1.40063	3.34749	4.78921	6.10568	3.0499	3.25782	1.84505	1.39586	3.61122	3.50637	3.57738	1.9951	1.92418	1.49622
ENSG00000186354	C9orf47	0.122222	0.117689	0.201851	0.078222	0.023167	0.215106	0.173702	0.126746	0.226556	0.303083	0	0.10528	0.275036	0.229475	0.078529	0.034305	0.129564	0.09429	0.216343	0.091622
ENSG00000165118	C9orf64	3.487	4.21048	4.87858	1.98045	1.59359	0.761647	0.596381	5.02255	4.72643	5.26179	2.89599	4.03996	1.28531	0.442318	2.77523	2.91339	2.1608	4.02748	0.449098	0.484834
ENSG00000147894	C9orf72	6.25822	13.0134	8.45845	14.934	7.82702	3.67258	3.82371	10.9273	7.31571	20.4934	14.8195	10.334	3.59605	3.95848	11.8056	11.0136	11.6377	9.38883	4.21082	3.43422
ENSG00000136819	C9orf78	13.1394	14.2808	12.0361	11.8547	12.5251	1.24048	1.36143	16.5057	15.0044	5.54229	12.7079	4.84471	3.955	1.38268	11.0125	11.4139	4.14579	11.855	1.19061	1.36224
ENSG00000155621	C9orf85	5.32435	6.41446	7.77209	3.45275	1.77481	0.947531	1.02073	4.23337	6.93226	8.38296	3.78791	3.64978	1.36833	0.459931	5.70715	5.14703	5.27483	3.29493	2.21071	0.799177
ENSG00000154975	CA10	0.009108	0.006534	0.00423	20.1687	21.6946	0.135873	0.044855	0.008264	0.002303	0.007785	24.1303	23.1906	0.064007	0.04575	0.004433	0.003835	21.6751	23.9665	0.123116	0.036991
ENSG00000063180	CA11	17.3523	1.44601	1.27373	2.82477	3.28099	0.732917	0.660864	21.6739	1.0303	1.13567	2.04475	1.77161	0.464195	0.523089	18.858	1.00021	0.891518	2.06188	0.235044	0.437092
ENSG00000074410	CA12	0.460856	0.013328	0.008811	0.110356	0.402326	1.24943	1.4145	0.17675	0.014384	0.024606	0.117279	0.253787	0.715985	0.739935	0.367663	0.011979	0.148104	0.306304	0.416514	1.12342
ENSG00000185015	CA13	0.10526	0.380939	0.31618	0.286006	0.214847	0.378122	0.084424	0.203283	0.419178	0.334994	0.148492	0.18449	0.231751	0.112439	0.352367	0.703871	0.165336	0.21619	0.425346	0.043818
ENSG00000118298	CA14	13.0677	10.1202	11.7357	3.67573	1.81644	0.764069	2.20329	17.5282	9.60579	14.6909	1.82141	2.02119	0.800526	2.245	17.7681	11.0338	1.41703	2.63125	0.668016	0.994828
ENSG00000104267	CA2	2.53061	3.56934	3.57494	1.88308	1.42688	4.63142	5.70063	2.5495	3.61327	4.77132	1.33078	2.0623	5.69205	5.75465	3.70319	2.67666	1.9191	2.95572	3.39363	5.58003
ENSG00000164879	CA3	0.099271	1.74701	2.32165	0.598903	0.734448	0.035293	0.080103	0.138976	1.806	1.6051	0.248364	0.205073	0.070194	0.029387	0.097918	1.40734	0.51393	0.304037	0.118447	0.037768
ENSG00000167434	CA4	0.169123	3.00058	2.65998	0.290832	0.103795	0.454795	0.841723	0.479248	1.73118	1.04881	0.05391	0.043692	0.261688	0.442973	0.328135	1.99614	0	0	0.29533	0.353744
ENSG00000169239	CA5B	1.59471	0.727393	1.26935	0.311834	0.223848	0.450546	0.435121	2.81265	1.83782	1.8356	0.24662	0.460474	0.464007	1.23642	1.25893	0.383264	0.495352	0.578277	0.617706	0.203949
ENSG00000186312	CA5BP1	0.256598	0.267643	0.233255	0.169592	0.136045	0.268041	0.132584	0.364161	0.286191	0.163494	0.168825	0.209788	0.142293	0.153454	0.219278	0.156348	0.151023	0.215848	0.237357	0.045602
ENSG00000178538	CA8	0.653505	1.19408	0.893328	0.363177	0.340224	0.675114	0.198056	0.618974	0.880218	0.766968	0.205406	0.186068	0.686108	0.327373	0.669806	0.986694	0.480056	0.348715	0.333378	0.37835
ENSG00000120159	CAAP1	16.0449	14.075	1.75231	1.23911	6.90303	2.77854	2.77139	22.042	11.2514	11.2667	1.45324	7.66381	6.31231	3.8979	13.4971	5.2887	0.850771	1.09085	0.856335	2.83644
ENSG00000135932	CAB39	2.63252	2.20723	3.81871	3.16527	2.61676	1.98162	2.11157	1.95743	3.73554	2.72167	3.26246	3.03215	1.73688	1.78145	2.2015	4.28261	4.15964	2.93504	1.7298	1.96856
ENSG00000102547	CAB39L	3.17968	3.15489	0.570953	11.65	10.2171	0.487072	4.09612	3.5804	4.27184	2.67866	10.8883	12.9888	1.58071	0.707619	3.5326	0.63196	9.42867	6.66512	0.512666	1.81354
ENSG00000183346	CABCOCO1	0	0.786242	1.11707	0.377568	0.329993	0.578936	0.465208	0	0.595878	1.07659	0.232661	0.570712	0.573529	0.428731	0.057073	0.822494	0.488113	0.259507	0.213502	0.206287
ENSG00000099991	CABIN1	3.17511	2.14126	1.89153	1.09587	1.22219	1.87698	1.27467	11.2852	1.71681	1.39346	0.394398	0.902239	0.443043	0.88868	6.1071	1.23273	0.123388	0.948741	0.222582	0.499314
ENSG00000134508	CABLES1	3.23376	0.067667	0.114346	0.053141	0.069922	0.136489	0.05147	2.69227	0.088304	0.095683	0.052044	0.077448	0.250489	0.074764	2.81177	0.105329	0.038091	0.091791	0.106109	0.025076
ENSG00000149679	CABLES2	1.23622	2.83428	1.77353	2.69419	3.17076	0.388726	0.419652	1.42708	2.50662	2.22253	2.15403	2.47605	0.619749	0.214601	1.10143	2.91022	1.18195	2.62162	0.394857	0.336625
ENSG00000154040	CABYR	2.1806	3.95039	1.55228	3.05938	3.65098	0.939539	1.03943	2.51862	2.55325	4.61012	10.8968	5.92055	0.843743	0.643922	2.36451	2.00724	7.49746	8.3865	1.37194	0.885462
ENSG00000160325	CACFD1	1.41974	0.378386	0.845864	0.502463	0.375848	0.044749	0.162245	0.54147	0.232744	0.137318	0.215019	0.157878	0.140411	0.040443	0.55261	0.068494	0.085429	0.180379	0	0.024304
ENSG00000158966	CACHD1	31.1158	12.5927	12.3957	5.80241	2.08894	1.66884	1.13371	35.1399	2.96891	3.33807	1.99419	2.12181	1.35773	1.10197	29.098	12.3089	2.44715	3.2054	2.94286	1.75286
ENSG00000141837	CACNA1A	0.646816	0.128462	0.119388	1.60772	0.554376	0.328012	0.108375	0.872399	0.172686	0.285809	0.551909	0.628316	0.354736	0.053787	0.537532	0.531228	0.237589	0.462152	0.076294	0.022595
ENSG00000148408	CACNA1B	0.407401	0.208638	0.174057	1.33504	1.49729	0.079368	0.0295	0.362879	0.11244	0.136798	1.41132	1.32322	0.062675	0.039257	0.285547	0.16379	0.783063	1.83751	0.132963	0.024931
ENSG00000151067	CACNA1C	0.017442	0.021364	0.0136	0.09783	0.07761	0.212736	0.058025	0.018339	0.007823	0.010046	0.094255	0.076469	0.060836	0.054834	0.014593	0.005609	0.070974	0.072891	0.164051	0.02258
ENSG00000157388	CACNA1D	0.019623	0.029695	0.033728	0.33524	0.070516	0.889886	0.045817	0.034391	0.020433	0.02664	0.037882	0.350504	0.132704	0.111957	0.01809	0.030025	0.085773	0.082103	0.488162	0.182939
ENSG00000198216	CACNA1E	0.189049	0.13316	0.128918	0.180834	0.21244	0.1067	0.044994	0.118513	0.11439	0.186172	0.213985	0.228194	0.047912	0.053216	0.072916	0.162633	0.200357	0.236109	0.108555	0.048835
ENSG00000006283	CACNA1G	0.315974	0.163221	0.169374	0.138574	0.091024	0.166608	0.102388	0.424653	0.121181	0.136016	0.078468	0.021925	0.033105	0.147906	0.447207	0.196273	0.027335	0.097723	0.057072	0.034141
ENSG00000196557	CACNA1H	1.02294	0.286517	0.155826	0.525961	0.659844	0.109977	0.147357	0.819411	0.166807	0.120102	0.178114	0.229391	0.141604	0.078827	0.598529	0.160641	0.086792	0.19105	0.140978	0.03825
ENSG00000153956	CACNA2D1	8.15709	3.45605	3.31058	26.9419	24.6944	2.9581	1.67274	7.29509	2.86011	3.99741	28.986	28.5343	2.46685	1.8292	6.39766	3.59917	18.2421	29.8011	3.52861	1.16244
ENSG00000007402	CACNA2D2	0.930738	0.207296	0.142029	0.302939	0.342243	0.096727	0.064004	1.1083	0.155495	0.107161	0.224344	0.229921	0.127188	0.10537	0.936184	0.089701	0.096906	0.254061	0.049489	0.038039
ENSG00000157445	CACNA2D3	0.035466	0.029027	0.026731	0.137576	0.097684	0.182224	0.053575	0.040687	0.020956	0.02444	0.997638	0.091984	0.064843	0.063256	0.020115	0.028334	0.118266	0.078618	0.144848	0.033741
ENSG00000067191	CACNB1	0.139229	0.285271	0.73437	1.10283	1.78868	0.03017	0.262406	0.180864	0.837157	0.049208	1.36044	0.50326	0.078537	0.035995	0.061017	0.15996	0.13023	0.794786	0.012761	0
ENSG00000165995	CACNB2	0.084429	0.028338	0.016867	0.029396	0.021532	0.995972	0.012513	0.781539	0.016702	0.014508	0.028675	0.0174	0.042245	0.198102	0.049244	0.016753	0.031346	0.020915	0.091189	0.007267
ENSG00000167535	CACNB3	0.390859	0.79316	0.844996	0.913102	9.0205	0.25376	0.236654	0.479854	0.598156	0.405003	0.585954	0.773343	0.328525	0.354034	0.293836	0.55431	0.216253	0.662149	0.262405	0.085141
ENSG00000182389	CACNB4	0.266658	0.323438	0.486197	0.290789	0.480515	0.604792	0.139819	0.114098	0.208313	0.381839	1.57812	0.506302	0.07584	0.201002	0.190046	0.327149	0.985613	0.299796	0.301903	0.051874
ENSG00000075461	CACNG4	0.269999	2.62153	2.64295	5.85544	7.36098	0.605226	0.660873	0.787321	2.95656	2.37425	4.93522	5.1068	0.476107	0.561177	0.442327	2.50179	3.96487	6.80584	0.360022	0.37628
ENSG00000130433	CACNG6	0.110482	0.561025	0.91639	0.207549	0.342165	0.209534	0.226889	0.352263	0.421812	0.62768	0.14175	0.166322	0	0.097143	0.13911	0.716452	0.285743	0.119579	0	0
ENSG00000105605	CACNG7	2.348	0.316793	0.135618	0.979633	0.784004	0.152111	0.141732	1.66449	0.107026	0.041664	0.565182	0.676681	0.076023	0.123778	1.37241	0.184387	0.422779	0.949632	0.043115	0
ENSG00000142408	CACNG8	0.376807	0.009885	0.02798	0.088681	0.071335	0.037134	0.065022	0.302726	0.035319	0	0.045118	0.072891	0.121069	0.081805	0.330172	0.079026	0.01502	0.10874	0.054792	0.051055
ENSG00000105298	CACTIN	0.474153	0.36006	0.331151	0.212244	0.310551	0.080295	0.099187	0.495869	0.290032	0.17999	0.132609	0.142707	0.017524	0.096967	0.403836	0.142935	0.021853	0.157625	0.020485	0.019338
ENSG00000151893	CACUL1	11.7778	12.2843	8.93507	9.38111	8.78604	4.98223	3.38648	12.6887	8.81308	12.1403	10.2784	11.3446	5.54175	4.00228	11.9375	8.8306	12.0369	10.9698	6.46333	4.40186
ENSG00000116161	CACYBP	46.57	43.1796	46.3902	30.5016	18.5933	7.08223	7.75753	51.7629	44.5302	59.5098	29.4279	30.3443	7.77347	8.04153	53.1858	49.3914	34.9522	26.3993	8.68333	3.11511
ENSG00000084774	CAD	10.2197	6.05577	4.12549	1.31276	2.27025	2.39972	0.403885	8.11585	5.36102	4.63188	1.06403	0.454574	0.422012	0.445239	8.38703	2.83075	0.214615	1.20771	1.73838	1.14795
ENSG00000182985	CADM1	0.6423	60.0843	47.7453	59.0571	60.7588	1.65608	1.82057	3.57295	56.1628	63.0986	28.6893	81.9142	1.20867	12.7364	5.30733	43.7935	75.2749	89.698	4.16475	0.756679
ENSG00000175161	CADM2	1.5393	0.76405	0.422417	11.8707	8.81073	0.775911	0.516716	1.82819	0.434495	0.623599	14.2636	8.18507	0.643809	0.53778	1.67227	0.363649	12.9996	9.94213	1.11755	0.563965
ENSG00000162706	CADM3	1.11224	2.95975	2.58183	11.2791	14.5823	0.310609	0.453998	0.942141	3.30194	2.43507	6.70578	7.59544	0.394795	0.255606	0.587071	1.66618	3.29573	8.37995	0.146234	0.175922
ENSG00000105767	CADM4	1.25695	4.4695	2.60133	3.71391	5.33195	0.596876	0.922632	1.25655	3.14472	2.40983	2.75854	3.04991	0.621877	0.5847	1.0371	2.62316	2.87581	3.60746	0.348197	0.383816
ENSG00000163618	CADPS	2.7326	5.96244	4.83772	16.0963	31.5643	2.21304	0.908172	3.76025	4.01124	6.64206	18.41	26.8869	2.93452	1.77047	2.44902	5.4401	49.0834	21.9966	3.35725	0.908678
ENSG00000081803	CADPS2	11.0624	8.87849	5.21607	2.19951	2.14064	1.80187	2.31284	17.1055	8.59098	6.20244	2.28938	3.47776	3.13094	2.20567	14.7371	5.75056	2.28036	3.11303	2.20373	2.259
ENSG00000104327	CALB1	5.67389	28.8992	8.99213	20.7567	15.5996	5.20344	15.5438	9.46063	16.5581	17.6155	29.6394	21.0298	3.77038	14.3352	6.72187	6.7886	25.8807	19.9082	5.48637	12.0543
ENSG00000172137	CALB2	0.482646	0	0	2.11722	3.71224	1.13929	0.679758	0.938276	0.06047	0.264134	1.31789	3.30482	2.4416	1.22069	0.234611	0	0.878167	2.46555	1.11008	0.765989
ENSG00000110680	CALCA	0.096683	1.87797	1.89235	0.061876	0.059707	0.101589	0	0.05013	2.39835	1.88749	0.367839	0.1508	0.050514	0	0.047055	1.38032	0.062358	0.164498	0	0.049219
ENSG00000012822	CALCOCO1	1.11895	5.00457	2.56289	2.82329	5.51037	3.21616	1.50611	5.65629	3.09882	1.78809	4.20827	1.83085	2.6338	2.4669	1.19577	3.79406	1.256	2.16517	0.720921	1.25074
ENSG00000136436	CALCOCO2	6.24029	8.61569	10.1268	3.94086	4.22205	5.3076	5.7883	5.72973	5.9397	10.7791	3.46129	7.34401	7.28245	4.29545	5.64492	12.621	6.92191	7.14189	8.95324	4.49148
ENSG00000064989	CALCRL	1.07741	3.37199	1.71268	0.354167	0.236565	0.704737	0.533611	1.85995	1.97135	1.98054	0.44643	0.275207	1.09306	0.512202	1.59204	1.40376	0.324429	0.221362	0.928815	0.436781
ENSG00000122786	CALD1	28.7629	23.9886	6.71758	1.51971	2.75613	32.3566	5.00378	26.4692	25.7617	30.334	2.03286	13.3012	35.1146	13.4387	27.9421	3.75084	1.29745	14.5974	66.7058	3.3829
ENSG00000164451	CALHM4	0	0.27276	0.13125	1.40038	2.16771	0	0	0	0.758079	0.120161	1.67947	1.93476	0.110178	0.046354	0	0.638932	1.62978	1.35331	0	0
ENSG00000178033	CALHM5	0.020924	0.140892	0.104185	0.374426	0.423534	0.210621	0.151201	0.042966	0.222822	0.168359	0.577792	0.534306	0.393244	0.128328	0.019355	0.281021	0.406483	0.533175	0.124373	0.044937
ENSG00000198668	CALM1	145.832	110.131	94.8937	91.721	138.231	35.0579	38.2885	243.53	103.948	57.7504	198.621	187.41	28.2721	22.1407	145.052	81.0362	201.022	194.434	19.8236	35.1604
ENSG00000160014	CALM2	43.88	46.1077	45.4692	41.5484	46.5408	9.67977	6.68604	49.6043	43.2014	29.35	21.9707	23.9882	7.92641	3.55631	36.3014	40.9871	4.33225	32.0347	4.82823	3.91012
ENSG00000143933	CALM2	359.879	497.349	443.362	923.216	967.829	94.9405	143.473	370.474	577.992	669.728	1707.06	1459.37	208.189	140.072	448.667	535.09	1603.98	923.802	140.544	150.503
ENSG00000183166	CALN1	0.303857	0.011698	0	0.006628	0.011676	0.101217	0.002627	0.806285	0.008208	0.012464	0.013668	0.015578	0.014162	0.016374	0.372795	0.011468	0.01576	0.029602	0.016143	0
ENSG00000179218	CALR	164.27	115.278	104.449	37.5029	42.0012	49.4293	43.5101	230.912	121.644	90.67	20.9966	32.7979	64.5808	42.3185	203.556	100.112	12.5765	31.0138	33.3529	21.474
ENSG00000128595	CALU	78.4733	74.583	76.781	18.7745	16.9438	37.848	42.501	84.4477	89.0191	89.0913	16.2065	27.9016	57.6645	43.1969	89.7633	74.6563	25.1652	25.8446	53.6672	39.307
ENSG00000134072	CAMK1	0.68909	1.31877	0.743027	0.290455	0.398213	0.358918	0.356195	1.72062	1.06208	0.969905	0.193615	0.473114	0.315772	0.231216	1.95771	1.02011	0.141046	0.129561	0.35761	0.252199
ENSG00000183049	CAMK1D	1.08566	0.763083	0.636111	1.31013	1.3194	0.412305	0.516632	0.898545	0.645757	0.515414	1.19297	1.06095	0.421196	0.548804	1.30828	0.620281	1.07636	1.54228	0.416706	0.457637
ENSG00000058404	CAMK2B	0	0.031889	0.013677	0.078902	0.102863	0.031931	0.010756	0.011392	0.027993	0.006419	0.021427	0.063059	0.005624	0	0.003186	0.009437	0.043015	0.095024	0.026502	0
ENSG00000145349	CAMK2D	6.02971	6.8985	4.60882	5.9468	8.20172	20.4042	14.8194	5.30699	6.75411	12.7611	5.93116	10.7154	23.1265	16.943	3.23813	10.2999	10.6854	9.32291	21.2843	14.987
ENSG00000148660	CAMK2G	3.35458	2.07963	1.89481	1.61051	1.4211	1.36708	0.748464	3.36987	1.89021	1.87478	1.04696	1.29426	0.96337	0.608659	3.50792	2.37827	0.91089	1.82361	0.837751	0.599083
ENSG00000162545	CAMK2N1	1.36205	15.5495	11.5118	21.1582	23.3374	5.16126	1.65019	1.21738	16.6154	11.0998	30.3759	16.7373	4.74078	2.54042	0.804512	8.95263	28.0376	20.0113	6.82273	2.2214
ENSG00000163888	CAMK2N2	1.11424	0.7983	0.093553	0.579101	1.54895	0	0.071401	1.32066	0.376535	0.43169	0.577592	0.926895	0.078925	0	0.862582	0.127194	0.291324	0.344413	0	0
ENSG00000152495	CAMK4	0.577432	3.2486	1.65084	5.49963	2.83673	0.690462	0.358854	0.511437	2.801	1.81659	6.69757	4.87094	0.477109	0.347788	0.795514	1.34604	4.10135	3.56954	0.925048	0.5584
ENSG00000004660	CAMKK1	0.189189	0.349002	0.066782	0.176834	0.15115	0	0.026727	0.236882	0.16701	0.203964	0.142049	0.129248	0.028099	0.048493	0.161721	0.04667	0.085833	0.160188	0.016424	0
ENSG00000110931	CAMKK2	2.47014	2.94996	2.66493	4.33791	4.49256	0.779555	0.483336	3.13573	2.84861	2.5929	4.75554	4.60494	0.706198	0.453001	3.2228	2.56819	3.42886	4.29388	0.695021	0.410606
ENSG00000143919	CAMKMT	2.3622	4.12483	1.38519	0.048707	0.074359	0.203105	0.049266	4.77807	0.321627	2.66962	0.033055	0.05839	0.042783	0.414937	5.44212	1.01543	0.068548	2.3462	0.140812	0.54625
ENSG00000164076	CAMKV	7.12731	3.8733	3.47977	3.07139	2.43054	0.027302	0.04987	9.13805	3.91912	2.40581	1.47934	2.26293	0.082143	0.022963	7.62401	2.85106	1.02042	2.29494	0.621029	0.089127
ENSG00000164615	CAMLG	17.1924	24.2505	28.3689	29.6326	20.4752	7.18684	6.63816	18.1831	27.2195	32.7866	37.4501	32.1517	9.73265	7.02477	17.218	22.6154	36.3075	32.1253	8.26408	8.48328
ENSG00000130559	CAMSAP1	7.27481	18.8839	11.792	19.4573	33.348	3.18121	4.23932	12.7742	15.3105	14.3434	17.5305	15.7168	3.01851	3.59876	7.56718	15.5316	13.9915	18.7593	5.65626	2.54704
ENSG00000118200	CAMSAP2	18.584	24.7562	22.6011	60.0605	54.5728	9.91637	8.14339	20.0068	24.1581	26.961	81.1097	74.7914	10.526	8.1221	19.4867	18.4055	79.8155	76.471	12.5263	8.46422
ENSG00000076826	CAMSAP3	0.567176	0.147489	0.194247	0.236521	0.586937	0.089017	0.020275	0.512741	0.148997	0.048397	0.054213	0.085033	0.088308	0.01719	0.265403	0.071158	0	0.167367	0.023173	0.023756
ENSG00000171735	CAMTA1	41.1432	41.1611	22.9069	12.1849	18.5481	7.01255	5.66442	22.3371	20.7934	32.8652	11.024	21.5807	7.24298	7.22601	25.7042	28.7373	12.4872	15.0851	9.45523	8.80992
ENSG00000108509	CAMTA2	0.119526	0.114645	0.060145	1.13127	2.13845	0.123348	0.016538	0.416766	0.033818	0.11172	0.108263	0.33072	0.049676	0.373638	0.531643	0.189133	0.02212	0.867129	0.060974	0
ENSG00000111530	CAND1	39.8617	51.4088	44.6564	37.8513	30.2547	13.0551	10.2349	42.3368	49.5452	54.3976	46.3808	44.0925	15.7397	11.4794	44.4229	45.4857	51.3885	46.6612	18.4697	9.73879
ENSG00000144712	CAND2	1.01424	0.936168	0.864765	0.58045	0.49925	0.305304	0.231857	1.19003	0.80083	0.497686	0.592082	0.720751	0.211775	0.211218	1.19575	0.50317	0.363119	0.540686	0.24087	0.104634
ENSG00000171302	CANT1	1.45433	1.3016	1.16286	0.560062	0.721849	0.400481	0.605173	0.903903	1.29262	1.01949	0.368299	0.573483	0.3941	0.40678	1.03409	1.29156	0.28916	0.599161	0.340685	0.223266
ENSG00000127022	CANX	184.583	123.562	168.546	176.899	90.325	46.2431	25.8851	126.085	117.115	80.7369	138.176	154.6	64.358	38.7173	141.168	173.194	167.667	60.8461	88.4639	25.7735
ENSG00000131236	CAP1	65.2607	58.1314	48.3255	35.1166	33.811	19.9347	18.0856	93.7529	47.1889	61.4132	34.8841	42.2834	29.3745	9.53401	75.0081	54.9635	35.3668	52.5765	22.2539	16.5354
ENSG00000112186	CAP2	4.36281	5.78896	4.85792	12.622	9.54656	1.45524	2.24657	4.27977	6.39767	6.03054	14.5817	12.4628	1.28935	1.09143	4.46649	4.97991	13.5055	11.9752	1.28854	1.59275
ENSG00000042493	CAPG	2.76785	0.190619	0.061691	0.035417	0.0663	0.107232	0.262321	5.91514	0.539677	0.280606	0.039761	0.115662	0.087609	0.024329	4.64746	0.046598	0	0	0.008855	0.094429
ENSG00000014216	CAPN1	8.7168	3.13001	3.18259	2.95552	3.95064	0.924638	0.745154	23.863	2.88327	1.95052	0.635539	1.86906	0.517727	0.484278	15.2879	1.75025	0.111485	1.87144	0.215981	0.088036
ENSG00000142330	CAPN10	0.627187	0.253263	0.429508	0.116089	0.414503	0.136799	0.103074	0.9832	0.427942	0.103261	0.054401	0.102875	0.078873	0.224303	0.481578	0.15243	0.023507	0.094234	0.093598	0.03235
ENSG00000260942	CAPN10-AS1	0.378126	0.270579	0.317915	0.176325	0.158823	0.054314	0.222737	0.345648	0.54219	0.146699	0.065992	0.106968	0.161244	0.154035	0.501412	0.431808	0.132699	0.089281	0.121929	0.029062
ENSG00000162949	CAPN13	0.739468	0.115956	0.024044	0.71947	0.440529	0.054008	0.016361	1.28117	0.276518	0.096668	0.174988	0.514044	0.294761	0.059367	0.425552	0.056994	0.087968	0.676404	0.181862	0
ENSG00000103326	CAPN15	0.282783	0.134818	0.188418	0.044168	0.076835	0.044282	0.069839	0.336773	0.125934	0.183219	0.053893	0.036386	0.042297	0.030218	1.70203	0.135395	0.044691	0.040413	0.040981	0.031226
ENSG00000162909	CAPN2	12.9706	18.9435	16.2341	9.77044	6.16693	15.8522	7.46527	11.9674	21.8728	19.5374	4.36161	17.3512	17.8312	8.91672	7.16332	18.1449	18.0601	8.02526	15.967	6.38627
ENSG00000149260	CAPN5	0.550226	0.355089	0.220764	0.294103	0.617576	0.139718	0.128244	0.477748	0.101043	0.1909	0.149413	0.190141	0.139124	0.139866	0.518865	0.161619	0.106753	0.347318	0.152126	0.037519
ENSG00000077274	CAPN6	2.65477	3.10192	3.10406	1.35814	1.20159	2.78951	0.661567	2.62515	2.8295	2.71949	0.809045	1.22234	2.06718	0.633262	2.33407	3.36363	0.927208	1.12709	2.31225	0.807746
ENSG00000131375	CAPN7	6.03611	12.1948	10.4299	8.82448	8.17891	7.39361	6.42359	5.78093	11.5499	12.1592	10.8343	15.7951	9.32332	6.01373	7.04067	11.0783	18.0014	12.3016	7.99616	8.56459
ENSG00000126247	CAPNS1	10.2249	8.24933	6.82631	5.12122	12.6565	2.89682	2.27471	33.7304	8.52976	5.77889	3.62961	4.63861	3.49894	2.36376	29.5961	6.70192	1.64122	5.15188	1.91961	1.59251
ENSG00000135387	CAPRIN1	125.484	122.139	115.953	122.696	110.345	26.4589	25.6797	130.045	134.982	61.2092	64.2418	63.4536	32.3095	22.4243	127.625	100.597	72.3731	146.405	18.6566	21.1441
ENSG00000110888	CAPRIN2	4.26767	4.23188	3.80635	6.73452	4.34144	4.17074	3.05722	4.22057	4.07468	4.82523	8.45205	11.2502	3.10601	5.34789	4.6433	9.73375	8.41289	8.03115	4.59614	5.01248
ENSG00000180881	CAPS2	0.111188	0.342635	0.386757	0.128222	0.104444	0.571953	0.192686	0.079509	0.269545	0.465876	0.174997	0.10263	0.210039	0.256321	0.104887	0.347721	0.484623	0.096299	0.507468	0.163275
ENSG00000152611	CAPSL	0	0.088441	0.223415	0.82931	0.447782	0.477593	1.68501	0	0	0.207623	0.580854	0.952711	0.934908	1.23247	0	0	0.696861	0.419527	1.18063	1.69249
ENSG00000116489	CAPZA1	54.3603	76.5705	83.4338	54.019	47.1152	17.8973	18.3216	58.2009	88.7001	93.1463	68.7205	66.0944	29.5901	17.2562	61.546	76.4162	72.4921	61.0794	25.4376	19.2028
ENSG00000198898	CAPZA2	34.4372	29.8634	24.6765	35.4271	26.1879	10.3869	10.4631	19.5721	67.8523	15.0491	35.2674	18.8764	15.8076	11.8667	35.3433	33.4717	31.0537	30.1995	12.1649	12.9431
ENSG00000077549	CAPZB	31.4781	24.8379	22.3789	16.076	18.7025	9.36032	9.29756	45.6067	23.0042	19.5521	13.0059	12.9258	10.1995	7.66425	40.6295	22.8816	0.379489	3.91001	10.3007	4.34801
ENSG00000100065	CARD10	0.308887	0.021571	0.034134	0.019119	0.037266	0.064667	0.057981	0.333176	0.042739	0.046704	0	0	0.025597	0.005122	0.13943	0	0	0.017111	0	0
ENSG00000198286	CARD11	1.05736	0	0	0.106911	0.08098	0.087971	0.019408	1.60307	0	0	0.027763	0.022725	0.137024	0.038433	1.14181	0	0	0.071614	0	0.024452
ENSG00000105483	CARD8	2.6235	9.24007	7.93734	2.4069	3.12766	1.94379	0.728873	3.43956	6.69013	4.77994	1.91137	3.54162	1.09482	0.974074	4.68533	3.48268	4.93873	4.53001	1.82373	0.898712
ENSG00000138380	CARF	0.605616	2.03531	2.69037	2.89255	3.52923	0.993211	0.86594	0.584713	1.87	2.2171	6.19303	3.13109	1.00423	0.859984	0.516606	1.82685	3.50766	3.85139	1.18108	0.496187
ENSG00000153048	CARHSP1	27.4061	32.1434	10.3973	5.7664	22.1534	0.610707	0.938705	26.8155	31.3747	8.40021	4.69461	5.04932	1.04361	0.823578	35.027	8.28389	4.27351	5.86226	0.639327	0.499342
ENSG00000142453	CARM1	7.26411	6.52226	3.60704	3.01508	3.79868	0.612727	0.877915	10.2915	3.75481	2.69446	1.75745	2.14953	0.721085	0.440741	8.63857	2.85869	0.471865	2.55871	0.354713	0.259647
ENSG00000079691	CARMIL1	11.6045	3.2802	3.08351	1.90603	1.67152	1.25392	1.78286	6.17341	3.31722	2.96057	1.42059	1.06691	1.32031	0.941452	11.1187	3.23555	1.5659	1.55668	2.6048	1.30114
ENSG00000159753	CARMIL2	1.27388	0.036274	0.002131	0.034205	0.229706	0	0	0.435466	0.025281	0	0	0.027787	0	0	0.72144	0	0.017236	0.015462	0	0
ENSG00000186648	CARMIL3	0.224945	0.409548	0.209725	0.384556	0.84002	0.031467	0.061459	0.191118	0.352125	0.225354	0.196654	0.295559	0.01533	0	0.213309	0.103711	0.137397	0.449432	0.036044	0
ENSG00000156017	CARNMT1	19.7408	13.3932	13.9311	5.36616	5.94455	3.37556	2.95047	14.7214	14.1696	10.69	3.92854	4.53558	3.41019	3.20537	15.366	6.72384	5.33653	6.73869	5.35919	2.42653
ENSG00000110619	CARS	2.40215	1.59741	3.11707	2.01535	1.94134	0.37619	0.637768	2.20133	1.95197	1.78034	1.68753	1.92048	0.355191	0.347634	2.67234	2.29245	1.40367	1.3664	0.365294	0.216206
ENSG00000134905	CARS2	6.37946	4.57402	7.13254	2.51627	5.21401	1.50997	1.78642	6.41038	7.00644	9.35438	7.14271	3.87129	2.02677	1.45128	7.03682	14.3748	6.65512	4.78204	1.42651	0.954526
ENSG00000164326	CARTPT	0	0	0	0.539274	0.72004	5.85503	0.895865	0	0	0.095937	0.216005	0.087096	8.84811	1.47663	0	0	0.634235	0.292717	7.03893	1.0497
ENSG00000118307	CASC1	0.020326	0.45062	0.278194	0.257044	0.253307	0.8448	0.898009	0	0.38841	1.65449	0.71037	0.673791	0.745721	0.946844	0.119698	0.201268	0.631886	0.625886	0.885838	1.14868
ENSG00000204682	CASC10	3.5805	3.26398	2.61009	1.44295	1.21431	0.369263	0.230522	4.9004	2.9244	3.92117	2.10749	1.4489	0.393413	0.189194	3.82015	2.11685	1.96818	1.03443	0.256308	0.300688
ENSG00000272168	CASC15	1.15116	3.524	1.33609	2.72178	5.73603	1.77733	0.725327	1.02255	2.74091	1.31467	7.99703	2.30031	0.713757	0.744036	0.892172	1.08307	3.46598	3.05468	2.05042	0.344471
ENSG00000177640	CASC2	0.01826	0.073916	0.687553	0.043966	0.048721	0.164294	0.09353	0.013471	0.069791	0.06163	0.034976	0.044212	0.883623	0.359384	0.004245	0.072199	0.06044	0.066011	0.115531	0.674568
ENSG00000108349	CASC3	19.7063	28.3204	19.732	14.6193	13.1217	2.91834	5.02844	23.1185	26.4896	24.2078	15.3208	16.1491	5.57155	3.69243	20.6523	20.369	14.2849	17.1893	3.24069	3.65781
ENSG00000166734	CASC4	18.9985	30.9948	31.4584	9.82085	25.1703	6.21205	20.5286	18.9878	30.3826	12.3642	34.3737	26.4408	19.1117	19.8047	15.6044	29.9374	37.8188	32.3999	12.9113	14.1239
ENSG00000127995	CASD1	6.08224	22.582	24.296	18.258	13.5923	3.325	3.37963	8.72733	8.11169	10.5317	21.2211	21.2987	2.44752	2.38573	5.93411	5.23516	22.8041	21.2662	4.21545	2.41757
ENSG00000147044	CASK	9.86371	9.4311	6.92934	19.3079	26.4001	4.96671	2.58654	10.8647	8.65323	6.03517	10.5407	25.0163	5.29735	4.54942	7.52631	6.63007	12.0098	34.8383	3.3034	3.46551
ENSG00000177303	CASKIN2	0.453725	0.253714	0.2498	0.126049	0.108884	0.110823	0.033739	0.46417	0.25944	0.123811	0.045107	0.088576	0.031073	0.043986	0.487965	0.169372	0.065208	0.080559	0	0
ENSG00000137752	CASP1	0	0	0	0	0	0.248379	0.223661	0	0	0	0	0	0.232261	0.217712	0	0	0	0	0.329389	0.525377
ENSG00000003400	CASP10	1.11373	0.104121	0	0.572397	0.351502	0.041901	0.076666	0.855514	0.06831	0.325961	0.017371	0.041538	0.339407	0.055986	1.4806	0.177663	0.03493	0.06267	0.385547	0.045748
ENSG00000106144	CASP2	2.72293	4.56286	3.52287	2.41453	3.02326	0.945096	0.48019	3.18597	3.32315	2.64993	1.15839	1.95778	0.640115	0.610057	3.93818	4.61348	1.84321	2.9357	0.730205	0.320896
ENSG00000164305	CASP3	57.8339	27.4875	29.8476	26.1598	23.735	9.23903	13.4958	64.5601	28.7472	34.2145	28.8792	37.0421	12.8659	11.7801	63.7897	26.295	39.0609	32.5912	9.3248	11.9973
ENSG00000196954	CASP4	0	0	0	0.017968	0	0.171349	0.292487	0	0	0	0	0	1.33907	0.493674	0.013664	0	0.036395	0	1.07681	1.81467
ENSG00000138794	CASP6	15.2719	22.7205	23.4047	8.19934	3.98824	3.53796	2.40511	19.0497	26.4558	21.063	1.48107	6.52754	5.09989	2.83017	22.2101	23.3573	4.9814	4.86634	7.15827	4.20258
ENSG00000165806	CASP7	0.203629	0.633963	0.30969	0.064769	0.059051	0.84639	0.779476	0.218746	4.40603	1.10872	0.048621	0.103733	0.41085	0.228777	2.42721	0.383281	0.089372	0.098488	0.279578	0.951721
ENSG00000064012	CASP8	0.318682	0.060629	0.051334	0.114955	0.093919	0.265229	0.16451	1.42806	0.041766	0.039624	0.106525	0.093315	0.257882	0.209703	0.338742	0.022957	0.187295	0.063973	0.933824	0.930823
ENSG00000118412	CASP8AP2	8.92489	18.1288	15.493	10.1263	9.06626	2.83277	2.15611	10.7243	17.4174	19.4025	12.4215	12.7188	2.98766	1.90115	11.3422	14.8901	17.3719	12.5731	3.65327	2.7456
ENSG00000132906	CASP9	3.42578	3.06267	1.24552	1.81922	0.812484	0.163708	0.294187	2.38386	2.55674	0.984262	0.643592	0.708336	0.142406	0.186453	2.20779	0.753605	0.576758	0.580923	0.136782	0.065969
ENSG00000153113	CAST	7.27044	10.8821	4.31369	0.860826	8.54514	2.73255	8.89445	10.0336	14.9011	17.0872	0.938087	3.32514	9.51511	5.27768	8.98568	3.22164	1.12574	2.34794	2.60758	0.98887
ENSG00000274070	CASTOR2	3.39669	3.06107	2.46667	2.51365	3.68986	0.238306	0.387251	3.94357	2.33902	1.59843	1.11567	1.48101	0.564563	0.330165	3.72759	1.48242	0.708496	2.05113	0.178912	0.227999
ENSG00000130940	CASZ1	0.219675	0.368022	0.37994	1.09559	1.15364	0.097522	0.038828	0.192773	0.427585	0.399578	0.676697	0.563453	0.169248	0.185192	0.100993	0.3189	0.673501	0.810938	0.038006	0.045226
ENSG00000121691	CAT	2.53289	5.83075	5.0653	4.59813	3.30381	4.55926	5.26615	3.62721	5.12638	4.88631	2.43511	3.91615	3.76834	3.70217	3.0291	4.18703	1.8198	2.94738	3.29865	4.16551
ENSG00000166762	CATSPER2	0.097164	0.19322	0.043597	0.07019	0.322553	0.201427	0.035347	0.047406	0.065156	0.054306	0.083536	0.083329	0.052889	0.092073	0.050916	0.101497	0.098018	0.100749	0.129119	0.021799
ENSG00000179397	CATSPERE	0.016812	0.448309	0.520385	0.291562	0.27966	0.095159	0.11476	0.046803	0.581895	0.920089	0.480544	0.55083	0.066153	0.0534	0.029632	0.742456	0.35518	0.471273	0.107707	0.035085
ENSG00000105974	CAV1	0.37996	0.417713	0.236929	0.276091	0.315599	1.67591	0.455603	0.43114	0.445467	0.574861	0.735043	0.322631	5.141	0.665672	0.57154	0.350868	0.271209	0.633883	2.15078	0.615798
ENSG00000105971	CAV2	0.008042	0.02763	0.015587	0.034381	0.40034	0.44516	0.037204	0.103189	0.007806	0.011765	0.645239	0.027379	1.91785	0.035836	0.00236	0.002149	0.032938	0.020011	0.048984	0.02463
ENSG00000177469	CAVIN1	5.39672	0.050627	0.096892	0.135546	0.164973	2.10386	2.28793	4.79493	0.105993	0.061255	0	0.055611	3.00471	1.20273	5.2964	0.088271	0.068988	0.030789	1.211	1.02319
ENSG00000168497	CAVIN2	0	0.031087	0.07853	0.285448	0	0.266801	0.177355	0.033037	0	0	0.04047	0	0.529685	0.110662	0	0	0.082192	0.073732	0.412001	0.252009
ENSG00000170955	CAVIN3	3.15505	0.238955	0.075453	0.234696	0.07524	0.190405	0.353676	2.9046	0.061591	0.138847	0	0	0	0.315479	2.88829	0.102586	0	0	0	0.138364
ENSG00000170681	CAVIN4	3.43843	3.71966	2.925	7.65116	8.15199	0.591851	0.441754	3.65618	2.62471	4.31973	10.4942	9.71079	0.502649	0.835278	2.76006	4.7436	8.51465	10.4645	1.02579	0.649211
ENSG00000078699	CBFA2T2	0.478775	0.85185	0.740184	0.727311	0.580759	0.637604	0.233185	0.467667	0.764338	0.690818	0.430854	0.564548	0.469965	0.415578	0.351477	0.75501	0.521683	0.660825	0.594482	0.164006
ENSG00000067955	CBFB	17.0726	23.3497	6.33788	6.69834	11.1661	3.68257	4.74923	6.86397	27.5204	8.96829	11.767	8.25742	6.67913	10.7176	13.5378	4.61659	8.29691	12.3565	4.52739	2.74927
ENSG00000110395	CBL	13.9567	5.79746	4.0699	5.49961	5.52369	2.62832	1.59452	11.7351	4.21056	5.07402	5.35957	5.93601	1.81677	1.9394	11.3141	4.92156	6.26563	8.03622	3.09146	1.19695
ENSG00000114423	CBLB	2.31038	10.072	5.27753	11.5798	11.8063	4.32069	1.00918	3.77368	6.13546	6.71397	9.11958	9.95498	1.22535	1.0935	2.25588	7.32079	6.2412	12.6335	3.2672	0.887241
ENSG00000142273	CBLC	0.855325	0	0	0	0	0	0.062833	1.18933	0	0	0	0	0	0	0.915136	0	0	0	0	0
ENSG00000105879	CBLL1	12.9187	12.7967	10.2589	11.7371	9.63677	1.65417	1.86034	12.5077	4.67513	14.5094	14.7029	15.6125	1.90898	4.52712	5.03712	10.0995	13.3038	12.3204	3.54489	1.38338
ENSG00000102924	CBLN1	1.53251	1.37853	1.11285	14.8311	15.7208	1.67542	0.828556	1.41945	1.03616	1.13511	25.9558	16.8337	2.47719	0.98172	1.23121	0.318711	17.435	19.1891	1.29331	0.974468
ENSG00000141668	CBLN2	0	0.008521	0	3.2996	6.18781	0.124876	0.021034	0.004505	0.00883	0.019805	2.7143	2.6837	0.105505	0.59724	0.004228	0	3.15331	3.6534	0.735725	0.068486
ENSG00000159228	CBR1	10.223	2.68951	6.23275	1.06903	2.8372	2.01679	2.18173	8.67071	5.57963	2.81268	1.54947	2.08951	2.29025	1.65318	9.87635	1.74673	0.887519	1.53304	0.74404	1.18057
ENSG00000145439	CBR4	8.62734	12.7676	10.8296	8.82457	7.94546	2.79305	4.76274	10.3631	11.6654	14.2928	9.40038	3.01005	2.46804	2.04382	8.45041	2.79496	3.45412	3.1174	3.2272	1.65757
ENSG00000160200	CBS	16.6867	3.78729	3.40158	1.02916	1.39197	0.272025	0.151123	15.4373	7.91406	3.71451	0.628933	1.07966	0.170327	0.197362	17.6977	2.77811	0.743201	1.23476	0.117781	0.180409
ENSG00000274276	CBSL	14.5491	4.10761	3.94437	1.60031	1.49286	0.210057	0.256124	17.1699	6.38005	4.08555	1.06853	1.29489	0.238168	0.312012	10.4502	3.94314	0.992607	1.39586	0.195224	0.325113
ENSG00000172785	CBWD1	8.18219	11.9857	10.0854	4.75172	2.71921	3.90479	2.75128	9.59333	9.04994	9.84001	6.16381	5.58173	3.88157	5.31282	10.181	13.4769	5.97759	7.83168	4.73142	4.80315
ENSG00000136682	CBWD2	5.46551	9.04376	11.454	3.7501	3.20128	3.03077	2.0438	9.9544	7.3007	10.9668	8.85867	12.2613	2.83957	1.4346	7.57199	8.78533	11.4487	10.8167	3.93651	2.23835
ENSG00000215126	CBWD2	1.37764	1.62244	2.69656	1.48914	0.485243	1.61299	0.808668	0.934442	1.49442	2.02983	2.39733	1.53882	1.36201	2.5106	1.17302	2.7267	4.99491	2.35034	1.59892	0.575858
ENSG00000196873	CBWD3	2.27995	4.04184	5.24069	2.32407	2.04075	1.52515	1.06623	1.21348	3.22294	4.87299	2.2833	1.69615	1.12207	1.71133	1.75402	3.58758	2.23597	2.71723	0.966707	1.34617
ENSG00000147996	CBWD5	2.69392	4.12497	3.97669	2.40484	3.34528	1.64623	1.501	1.36014	4.28311	6.06207	2.88519	3.27718	1.36501	1.95395	1.07459	4.02509	2.1126	1.56953	3.32393	1.06763
ENSG00000108468	CBX1	52.1041	84.4567	88.8328	48.291	59.0196	10.4716	13.6523	71.7126	89.5071	130.148	108.92	104.001	6.01545	4.27781	78.2561	33.8105	29.3927	64.5864	4.46852	4.24036
ENSG00000173894	CBX2	6.31028	4.79997	3.98872	1.05841	1.88026	0.257394	0.163227	8.22502	4.80296	3.181	0.923959	1.21366	0.298876	0.140151	6.73439	2.67312	0.287398	1.22049	0.173005	0.138432
ENSG00000122565	CBX3	162.521	191.045	174.151	154.716	127.82	30.9313	33.2322	172.013	182.271	214.29	220.447	194.337	45.3681	32.9827	167.78	148.774	233.086	182.32	55.8048	38.165
ENSG00000266405	CBX3P2	0.071275	0.922201	1.12628	0.666176	0.935907	0.45821	0.759341	0.074653	0.533623	2.2955	1.89224	1.73056	0.477078	0.455218	0.317598	0.323809	0.503089	1.48373	0.455809	0.298371
ENSG00000141582	CBX4	0.52317	0.480021	0.433664	1.25978	1.05445	0.776524	0.54811	0.389114	0.427653	0.449624	1.49508	1.3952	0.760911	0.590505	0.434207	0.116135	1.36723	1.64189	0.845051	0.436411
ENSG00000094916	CBX5	143.551	93.8211	95.2533	73.7771	88.5305	11.1261	9.16552	60.5862	78.6109	94.8234	60.5013	87.4865	14.607	14.2955	87.308	86.975	93.5179	101.403	13.1661	6.53574
ENSG00000183741	CBX6	2.15394	3.31756	1.83978	1.92704	1.70122	1.5111	1.30415	2.48196	2.16095	1.13143	0.832238	0.874306	1.51734	1.41227	2.70564	1.13124	0.446022	0.897837	1.06575	0.642137
ENSG00000100307	CBX7	0.077135	0.116345	0.125984	0.03324	0.132693	0.062626	0.166638	0.251293	0.077989	0.094368	0.180643	0.043238	0.032252	0.065194	0.232375	0.096056	0.033167	0.036074	0.030658	0.023232
ENSG00000141570	CBX8	0.049165	0.716	0.333267	0.684721	0.799732	0.10435	0.138947	0.050985	0.829917	0.565925	0.642406	1.1214	0.222371	0.095706	0.129191	0.577922	0.347394	1.08437	0.028991	0.189894
ENSG00000100211	CBY1	5.79293	8.4222	2.69227	2.23772	6.32333	1.52633	4.71275	6.94078	11.0405	10.0201	4.99109	1.81021	4.24092	1.79447	8.2243	9.87491	1.18219	1.38755	1.12504	0.919745
ENSG00000132024	CC2D1A	1.13464	0.23668	0.13169	0.049675	0.272621	0.191031	0.212679	1.28916	0.245852	0.156966	0.064056	0.126317	0.063576	0.14058	1.64813	0.034039	0.052408	0.070638	0.044082	0.045682
ENSG00000154222	CC2D1B	2.48232	3.78778	2.06265	1.31037	1.99651	1.33251	1.07235	3.69249	2.79323	1.99604	1.10796	1.68158	1.26686	1.22962	1.91623	3.17467	0.397815	1.21058	0.606859	0.908713
ENSG00000048342	CC2D2A	2.73863	4.14432	6.51751	4.05687	2.6914	1.74998	4.107	3.83501	3.9331	3.57976	3.59113	3.74184	2.25508	3.62218	3.4924	4.43882	2.81049	3.69183	2.52423	1.41693
ENSG00000060339	CCAR1	28.6941	37.9179	28.1432	18.7769	17.6367	8.40566	7.08016	42.3486	52.8324	42.0711	30.5984	28.6013	8.11755	7.23751	45.7993	47.2763	29.6182	18.1225	7.73571	6.13535
ENSG00000158941	CCAR2	7.87839	9.80904	9.36931	5.47963	7.81	1.46427	2.61857	10.4799	11.1052	6.35149	2.59806	4.82568	2.28056	0.981328	9.09806	6.29734	1.33183	4.4468	0.817285	0.771492
ENSG00000183287	CCBE1	0.112649	0.080356	0.085517	2.27684	2.23946	0.432065	0.17889	0.074049	0.050235	0.117343	2.1903	2.29752	0.286227	0.15845	0.096431	0.074317	2.3596	2.69703	0.510744	0.102971
ENSG00000150636	CCDC102B	0.033586	0.584757	0.637059	1.5656	0.057979	2.04734	1.5641	0.012587	1.11161	2.1332	0.042883	0.276397	2.07853	3.21129	0.018896	1.76113	1.21641	1.3637	2.90106	1.42621
ENSG00000159884	CCDC107	0.71834	0.987391	0.568959	0.801517	0.955356	0.518231	0.674617	0.799223	1.02133	0.496541	0.535609	0.776712	0.368388	0.311203	0.66933	0.909928	0	0.483082	0.162176	0.384183
ENSG00000168491	CCDC110	0.770087	0.141904	0.137313	0.31094	0.034359	0.175669	0.317162	1.23276	0.027848	0.126502	0.214144	0.057852	0.156568	0.297871	1.43369	0	0.214949	0.095297	0.279116	0.376603
ENSG00000164221	CCDC112	9.70404	7.75317	7.87359	19.3801	13.2778	1.55376	2.48233	7.27678	6.72339	9.32614	28.0123	28.3834	1.55392	2.12312	6.80841	7.83065	31.7776	19.7368	0.985521	2.2963
ENSG00000103021	CCDC113	2.43422	3.57982	1.3866	1.88395	1.54703	0.959899	2.57634	2.52681	1.03895	1.26112	1.49867	4.15387	1.0566	1.59549	1.89275	1.52883	1.47638	1.78946	1.15342	1.46713
ENSG00000136710	CCDC115	2.55626	4.22457	3.43245	3.66944	3.89293	1.18031	1.07191	3.51111	5.06582	3.57504	4.07928	3.8681	0.95822	1.04355	2.22874	2.94292	3.70845	4.21057	0.72267	0.608963
ENSG00000159873	CCDC117	25.0379	27.9574	20.7258	11.225	9.08895	7.25835	5.69484	24.8364	19.8952	29.556	13.2222	10.9955	7.33268	5.58803	25.3226	24.1163	12.5659	11.9507	6.98148	5.06167
ENSG00000160799	CCDC12	1.30727	1.54566	1.50176	0.751522	0.634764	0.182924	0.2496	1.76551	0.61031	0.999063	0.143616	0.213659	0.151668	0.394392	1.28411	0.774399	0.180434	0.172523	0.176602	0
ENSG00000147144	CCDC120	0.545131	0.438688	0.297817	0.330454	0.308164	0.622637	0.134389	0.704287	0.520592	0.334325	0.137942	0.220114	0.194791	0.135451	0.665861	0.293326	0.150587	0.209209	0.262792	0.046045
ENSG00000176714	CCDC121	0.960503	2.10794	1.46784	2.36168	2.17733	1.10913	1.39921	0.749084	2.49538	2.65641	1.55238	2.02061	1.47765	1.04843	0.674719	1.57712	1.90287	1.54166	1.42603	1.30638
ENSG00000151773	CCDC122	0.49515	1.39643	0.754037	1.43376	2.3311	0.478896	0.339411	0.425496	1.4404	1.48105	2.08594	1.19007	0.154082	0.166513	0.905587	0.922816	1.45448	0.913271	0.668862	0.075141
ENSG00000007080	CCDC124	1.00354	0.999892	0.633336	0.051304	0.408076	0.039952	0.033599	0.890736	1.98044	0.768002	0	0.117633	0.028966	0	0.793795	0.633984	0	0.173391	0	0
ENSG00000183323	CCDC125	0.260765	0.701219	0.814229	0.319428	0.342731	0.238638	0.145087	0.240196	0.903364	0.878812	0.313654	0.464937	0.115985	0.147883	0.256304	0.629118	0.546923	0.395001	0.144987	0.121868
ENSG00000169193	CCDC126	0.366864	4.56869	6.12779	10.9536	6.13335	2.26178	0.445232	2.74197	4.97292	7.40482	16.8259	6.47137	3.28422	3.41043	0.821567	5.38652	18.4975	6.99742	4.13343	4.03782
ENSG00000164366	CCDC127	1.56162	1.80031	1.49615	1.737	1.9974	0.995665	0.429057	2.2126	2.16603	2.27306	1.9389	1.7556	0.654372	0.490474	1.69691	1.8688	1.59412	2.41794	0.628713	0.539448
ENSG00000104957	CCDC130	0.501922	1.8337	0.616237	0.659571	0.496831	0.087321	0.154806	0.461063	0.645723	0.419103	0.112156	0.146717	0.322806	0.058111	0.346921	0.332673	0.092069	0.131657	0.047567	0.090477
ENSG00000100147	CCDC134	2.98418	2.95889	2.24996	0.693934	0.465064	0.413275	0.153147	2.40851	1.92297	1.65619	0.414671	0.335238	0.083804	0.3554	3.23827	1.06155	0	0.460312	0.084601	0
ENSG00000128596	CCDC136	2.38029	1.32318	1.42521	1.56543	2.08982	0.317858	0.322613	1.28662	1.69209	1.20983	1.33186	1.61486	0.33738	0.262845	1.07015	0.900393	0.569164	1.17087	0.39944	0.177558
ENSG00000185298	CCDC137	2.61327	1.84411	1.8745	0.51638	1.09672	0.436139	0.332887	2.60153	2.09709	0.718877	0.486857	0.342803	0.272051	0.098245	2.95614	1.478	0.190751	0.429715	0.043708	0.296237
ENSG00000163006	CCDC138	13.7751	22.329	30.5685	7.06686	10.2815	1.7234	1.34309	16.875	29.4852	30.5953	10.2601	14.5025	3.18481	1.96004	15.2607	20.3434	10.1617	13.8757	1.7899	1.85968
ENSG00000175455	CCDC14	14.1301	19.484	17.9879	8.33612	7.83178	7.94153	5.27541	13.3862	30.8516	29.9875	3.99467	13.7756	5.41328	6.12383	14.4959	27.7305	9.2108	10.1093	8.37626	3.13336
ENSG00000163081	CCDC140	0	4.37063	2.30481	0.266341	0.046404	0.197493	0.212627	0	5.01651	5.78737	0	0.086289	0.086715	0.277704	0	1.82875	0.160836	0	0.296054	0.046655
ENSG00000163492	CCDC141	0.272699	0.017852	0.075385	0.110439	0.162871	0.859937	0.276686	0.442347	0.036934	0.193966	0.203117	0.219018	0.526382	0.9403	0.261271	0.030708	0.170335	0.132926	0.29581	0.136528
ENSG00000135637	CCDC142	1.07417	1.49436	1.83751	0.917422	0.712619	0.418836	0.425256	1.39053	1.65257	1.49243	0.268987	0.863574	0.497708	0.473836	0.917223	1.11657	0.506009	0.572342	0.150624	0.314009
ENSG00000135205	CCDC146	0.016523	0.525745	0.658604	0.323444	0.780384	0.595401	0.93416	0.00434	1.49558	0.528414	0.822062	0.845099	2.37698	0.200755	0.021127	0.931025	1.16407	0.137036	0.729645	1.88847
ENSG00000153237	CCDC148	0.033819	1.05811	0.05262	0.021557	0.017197	0.092918	0.04975	0.01555	0.052253	0.05235	0.013562	0.023402	0.032176	0.030637	0.019434	0.062697	0.036645	0.033113	0.070675	0.037592
ENSG00000181982	CCDC149	0.545959	0.539975	0.682393	0.675339	0.785623	0.292623	0.072376	0.442241	0.730792	0.50229	0.458163	0.437545	0.222815	0.180662	0.373931	0.379671	0.329166	0.457081	0.209454	0.192669
ENSG00000149548	CCDC15	1.45701	2.96023	2.85474	0.933768	0.879459	0.815461	0.477055	1.76666	3.75407	3.15549	0.681196	0.714848	0.642867	0.352829	1.50381	2.6938	1.16381	1.06554	0.732602	0.256675
ENSG00000144395	CCDC150	2.52775	3.18589	9.98675	0.380454	0.197583	1.31362	0.206937	1.98135	5.2736	7.99536	0.746185	0.712331	0.559287	0.673119	6.27418	4.6632	0.313928	0.593258	0.709326	0.221643
ENSG00000187860	CCDC157	0.140576	0.060211	0.077387	0.097787	0.154337	0.034458	0.055633	0.200146	0.22047	0.089275	0.100201	0.113049	0.043633	0.053848	0.136686	0.079954	0.039898	0.090374	0.035743	0
ENSG00000203952	CCDC160	3.7304	9.02193	13.8812	1.46611	1.1308	0.946348	1.48992	5.3472	11.1067	10.8252	1.10383	1.83713	0.83956	2.0165	4.01111	6.41821	1.66837	1.19443	0.542911	1.74382
ENSG00000280670	CCDC163	0.406373	0.17051	0.231081	0.238324	0.127763	0.112351	0.066271	0.80506	0.603238	0.213261	0.095745	0.038799	0	0.062042	0.469281	0.525082	0	0.123548	0.221126	0.042165
ENSG00000198937	CCDC167	1.6117	12.5461	9.75218	4.00059	5.57362	1.01124	1.27112	4.72739	13.9306	8.08133	1.03022	3.08829	2.6307	0.844915	1.98124	6.94958	0.203764	2.47911	0.955631	0.886938
ENSG00000242715	CCDC169	3.67814	0.404229	0.352469	0.159141	0.145152	0.253698	0.094284	2.00664	1.15128	0.972488	0.186455	0.335595	0.13504	0.097525	3.96457	1.74586	0.187132	0.172647	0.1728	0.040167
ENSG00000120262	CCDC170	0.055822	0.165246	0.234667	0.339216	0.303879	0.750431	2.00847	0.078549	0.209609	0.1085	0.240665	0.223388	0.570947	1.38223	0	0.159211	0.290943	0.306673	1.50159	4.26129
ENSG00000164989	CCDC171	0.118787	0.394592	0.210342	0.136593	0.194023	0.208707	0.114223	0.186334	0.313551	0.273238	0.140668	0.457876	0.103078	0.133401	0.095037	0.23223	0.189256	0.147449	0.241513	0.093042
ENSG00000154479	CCDC173	0.174207	0.986328	0.933537	0.627443	0.422706	0.506079	0.746049	0.161649	1.17838	1.05072	0.6645	0.658962	0.407291	0.606853	0.196887	0.935054	1.37743	0.607411	0.41511	0.520942
ENSG00000154781	CCDC174	4.28602	6.67529	5.87203	4.19374	4.27139	1.43999	2.01664	4.16357	6.49253	5.92065	3.47275	6.06222	2.45831	1.27659	5.41769	9.17584	3.17508	4.44534	1.4469	1.10161
ENSG00000151838	CCDC175	0	0.061226	0.067715	0.549865	0.352578	0.2073	0.181241	0.032212	0.077573	0.1078	0.682282	0.435714	0.190856	0.15595	0	0.105142	0.480022	0.398625	0.037185	0.250974
ENSG00000267909	CCDC177	0.943567	0.753997	0.692014	0.80538	1.51594	0.049468	0	0.868038	0.796718	0.698655	1.07933	1.29803	0.077035	0.129206	0.839505	1.28798	0.507284	1.29503	0	0.056003
ENSG00000166960	CCDC178	0	0.025822	0.010981	0.051259	0.011004	0.089931	0.040451	0.004619	0.026889	0.050768	0.074183	0.037353	0.087887	0.033815	0.012149	0.035836	0.051714	0.226114	0.270602	0.053577
ENSG00000122483	CCDC18	10.6771	9.28235	11.3417	1.25062	1.43644	1.52757	0.898074	8.16644	12.4989	13.417	1.65812	2.10818	1.19639	0.748122	7.89364	11.7019	4.11476	3.09742	1.61677	0.715145
ENSG00000197816	CCDC180	1.43142	1.35677	1.28775	1.55126	1.92311	0.714607	1.30135	0.928583	1.03959	0.549495	0.212001	0.314629	1.01619	0.500633	0.644561	0.825533	0.363252	1.84369	2.39503	0.462409
ENSG00000117477	CCDC181	0.108657	3.89342	4.28382	0.284285	0.28656	0.135936	0.144853	0.145505	2.83724	0.779437	0.399272	3.6237	0.096707	0.15383	0.181119	0.576423	1.22023	3.22677	0.128054	1.4079
ENSG00000177875	CCDC184	0.043905	0.596401	0.324679	7.24849	10.2256	0.044986	0.164346	0.182123	0.663678	0.895233	5.71123	6.51046	0.225763	0.115814	0.12525	1.16691	3.92473	8.27651	0.254015	0.148845
ENSG00000165813	CCDC186	7.58827	2.77918	2.62979	6.21924	4.40457	4.53368	3.18404	7.6582	3.732	3.03621	5.28317	6.02794	3.12505	3.10222	7.19602	2.75173	5.29257	5.16325	5.33678	3.1429
ENSG00000196118	CCDC189	0.100166	0.154838	0.201048	0.042738	0.164549	0.035258	0.961124	0.069249	0.030416	0.076485	0.354158	0.136124	0.245397	0.044763	0.094927	0	0	0	0.137139	0.044455
ENSG00000185860	CCDC190	0	0	0	0	0.197502	0.336586	0.625508	0	0	0	0.045895	0	0.172024	0.40286	0	0	0.068872	0	0.352028	0.158276
ENSG00000163617	CCDC191	0.096626	1.04538	1.15925	1.39715	0.497322	0.570535	0.54455	0.135794	0.976962	1.11174	0.769614	2.25891	0.492075	1.11356	0.206038	0.657534	1.04976	0.677254	0.473843	0.785185
ENSG00000100557	CCDC198	0	0.821184	0.70628	5.3825	2.32172	0.676225	1.23159	0	0.818252	0.801415	3.14894	1.29975	0.318707	0.433419	0	0.633992	3.18503	0.962251	0.552137	0.325257
ENSG00000101997	CCDC22	0.7647	0.877727	0.346479	0.20571	0.45325	0.08635	0.156949	0.662656	0.773374	0.411275	0	0.084609	0.231391	0.034526	0.554425	0.265191	0.104962	0.283413	0.048461	0
ENSG00000147419	CCDC25	24.7599	32.2416	35.8998	14.6296	19.1565	4.83454	5.34536	27.4472	40.1016	45.5207	22.5269	26.9741	8.1342	6.14636	25.0443	34.5439	23.727	25.6943	7.93751	5.34501
ENSG00000024862	CCDC28A	5.51637	4.12542	4.59455	2.15495	1.83442	1.84632	2.29182	7.85874	3.74999	4.42007	1.71173	2.0486	2.15617	2.89746	6.63454	3.73374	3.41698	2.35177	1.62538	1.84828
ENSG00000160050	CCDC28B	1.08801	0.802002	1.56667	0.497791	0.751765	0.216405	0.488013	2.24944	0.619414	0.531548	0.466972	0.318703	0.264001	0.151271	1.0361	0.428503	0.133809	0.253458	0.129804	0.281413
ENSG00000151468	CCDC3	0.251104	0.789315	1.06755	0.977329	0.550269	0.318601	0.131489	0.2148	0.218374	1.46491	1.1354	0.868146	0.62622	0.459083	0.108483	1.25976	0.678508	1.23399	0.263535	0.139379
ENSG00000186409	CCDC30	0.040557	0.426726	0.155968	0.598243	0.322202	0.361312	1.09688	0.021523	1.37659	0.217988	0.367207	1.17875	0.169899	0.86859	0.025982	0.200953	0.663615	0.422778	0.689131	0.21167
ENSG00000128891	CCDC32	2.25549	3.88515	6.37113	0.430628	0.476767	0.460258	1.91598	0.339892	4.27246	0.434612	0.534995	2.15287	3.33484	0.183809	0.34234	0.553023	0.46744	4.05731	0.32015	0.197879
ENSG00000109881	CCDC34	8.11303	10.9136	10.136	2.63533	2.68217	1.45786	0.978617	8.06574	16.7047	9.78049	3.88739	4.88246	2.71407	1.83819	7.35584	10.7154	2.57491	3.79625	1.03291	0.769576
ENSG00000145075	CCDC39	0.116476	0.082196	0.032096	0.011055	0.032005	0.238811	0.307144	0.088417	0.08733	0.069251	0.176652	0.188164	0.134045	0.269192	0.528107	0.029092	0.149808	0.080158	0.137497	0.301128
ENSG00000141519	CCDC40	0.067069	1.14836	0.209831	0.149565	0.26412	0.113639	0.093074	0.719844	0.222808	0.127554	0.031356	0.178247	0.10128	0.150724	0.076908	0.13212	0.065559	0.099544	0.102535	0.092816
ENSG00000180329	CCDC43	18.0346	14.4166	15.2025	13.3931	10.3344	4.09072	5.7903	19.7551	16.2811	17.4984	15.3424	15.67	1.96013	5.22006	19.4434	5.31275	16.3111	14.7739	5.31215	1.41177
ENSG00000108588	CCDC47	26.9284	27.9786	25.4147	17.8821	16.6327	11.1958	8.92203	26.475	29.3483	36.4164	15.2652	21.3638	10.0967	8.88842	35.6285	28.5619	19.3582	18.3855	8.26407	9.71662
ENSG00000152492	CCDC50	5.23661	13.8424	14.5349	17.0815	15.2737	5.7094	4.50149	8.20285	11.947	14.2953	21.0903	19.3941	6.13427	4.9128	5.16626	9.01612	22.901	19.9056	5.79979	3.61203
ENSG00000164051	CCDC51	2.83559	2.3397	2.03997	1.40323	1.98734	0.853731	0.815799	3.40401	2.55527	1.26873	0.380646	1.17994	0.704391	0.683741	3.39799	2.1266	1.0996	1.17667	0.443314	0.337173
ENSG00000176155	CCDC57	0.050408	0.546609	0.102404	0.052897	0.093688	0.161257	0.042469	0.219057	0.410206	0.06167	0.038532	0.03134	0.306849	0.455981	0.041124	0.579165	0.029792	0.052997	0.260556	0.023364
ENSG00000160124	CCDC58	46.033	26.2489	25.4886	8.61109	9.31901	5.16006	2.71174	39.9214	33.981	28.2124	8.9797	13.2911	7.01365	2.82449	36.1936	33.6489	12.2906	12.5929	4.09115	2.66509
ENSG00000133773	CCDC59	17.0446	16.9791	20.6124	6.40947	4.63408	1.18543	3.15493	16.9061	19.9269	18.0675	2.8977	8.7073	3.82508	2.35231	17.9148	20.3737	13.3434	8.57348	2.5296	1.61386
ENSG00000108091	CCDC6	25.739	12.4571	9.78717	12.5591	9.47378	8.19135	4.56013	26.0295	11.0081	9.48756	12.3861	13.3571	5.63795	6.14254	24.8028	9.53982	12.8804	13.9145	7.20171	4.90529
ENSG00000183273	CCDC60	0	0.644114	0.447396	0.087261	0.9211	0.071024	0.044484	0.006843	0.677489	0.935519	0.055028	0.220159	0.361959	0.04472	0	0.133126	0.393716	1.08378	0.027335	0.028719
ENSG00000130783	CCDC62	0.022968	0.248964	0.536709	0.951793	0.863103	0.111899	0.176766	0.047634	0.532489	0.385392	1.0655	0.571041	0.141386	0.197545	0.044491	0.343888	0.676139	0.453924	0.185705	0.076063
ENSG00000139537	CCDC65	0.04335	0.614886	0.214781	1.30143	1.84175	0.452331	0.653942	0.022477	0.394474	0.274073	2.02683	1.76743	0.673662	0.784222	0.040944	0.870985	0.970448	1.69368	0.352041	1.02896
ENSG00000180376	CCDC66	4.95746	7.10907	9.24106	4.31617	3.6987	2.65317	3.23792	3.00412	9.4997	9.16152	9.39765	8.57815	1.62239	1.98338	6.14419	11.5778	11.0053	5.37859	4.39077	3.1526
ENSG00000198624	CCDC69	1.43157	0.090494	0.590402	0.022382	0.057808	0.154483	0.2938	1.56377	0.109696	0.087185	0.007479	0.041645	0.09703	0.146417	0.852504	0.039263	0.015037	0.020167	0.088854	0.051368
ENSG00000216937	CCDC7	0.051154	0.444188	0.571122	1.12887	0.754369	0.745274	0.883092	0.034869	0.542058	0.723045	3.13031	1.3999	1.17649	0.71808	0.022433	1.04541	2.07953	1.90652	0.637941	0.5709
ENSG00000177352	CCDC71	2.36644	2.07366	2.21642	0.652213	0.635711	0.487945	0.272463	2.50089	1.66005	0.32882	0	0.418045	0.295809	0.101573	2.6976	0.68089	0.073033	0.267357	0.176914	0
ENSG00000253276	CCDC71L	2.20623	4.28286	5.75784	5.8697	5.13515	2.53101	2.47664	2.39821	4.69883	5.3285	7.60044	6.55522	3.11297	2.18809	2.56079	3.59176	9.37795	7.00851	2.65947	2.62885
ENSG00000163040	CCDC74A	0.531934	0.87387	1.60348	0.148715	0.384911	0.269953	0.599846	0.682541	1.38356	0.736043	0.223681	0.442956	0.546955	0.599001	0.631263	0.580649	0.553934	0.320322	0.25698	0.150371
ENSG00000152076	CCDC74B	0.510923	0.658169	1.24331	0.236341	0.397365	0.28168	0.459816	0.531136	1.10269	0.778973	0.102608	0.142211	0.119548	0.260294	0.531852	1.15125	0.1461	0.193986	0.094302	0.291384
ENSG00000120647	CCDC77	10.3243	10.1808	14.0085	5.57904	1.88568	0.983194	1.065	9.81024	9.70402	15.5147	7.08609	1.68433	1.48949	1.46315	2.61497	15.998	1.95891	2.34572	1.82174	0.989541
ENSG00000169515	CCDC8	2.18571	2.478	1.89608	0.203689	0.429122	0.828825	0.765541	3.10883	1.88108	1.76459	0.279821	0.557067	1.09413	0.668668	1.72365	1.22623	0.449809	0.367196	0.560211	0.496857
ENSG00000091986	CCDC80	0.155766	1.50091	2.57872	0.507773	1.34044	2.98916	1.97874	0.08711	1.20612	1.76958	1.10243	0.750257	2.58969	1.19825	0.160193	1.14821	0.602194	1.22634	3.73636	1.25144
ENSG00000149201	CCDC81	0.060071	0.783979	0.331772	0.231245	0.027685	0.250895	0.283622	0.091118	0.387988	0.128623	0.319505	0.11764	0.165362	0.153135	0.241965	0.303864	0.087609	0.313849	0.159934	0.178574
ENSG00000149231	CCDC82	4.22116	6.78634	8.08773	7.94737	5.3851	2.87835	2.32495	4.80997	9.19977	10.1743	6.80031	11.6462	3.10622	2.78088	3.87995	6.2043	13.428	7.98745	3.83854	1.89356
ENSG00000186166	CCDC84	1.58696	1.70401	1.41844	0.263804	0.698863	0.799115	0.681214	1.5814	1.50939	1.20386	0.801949	1.29941	0.431715	0.720054	1.72639	1.35882	0.893002	0.758626	1.33934	0.625773
ENSG00000205476	CCDC85C	0.611353	1.17415	0.961946	0.332096	0.358299	0.1046	0.128944	0.617679	0.981513	0.756041	0.239406	0.273048	0.126073	0.127622	0.572575	0.643421	0.247504	0.316341	0.090824	0.05676
ENSG00000110104	CCDC86	3.71907	1.9466	1.13078	0.982777	1.00898	0.226669	0.372553	3.99954	1.81665	1.14917	0.560287	0.543098	0.320566	0.455417	3.28814	1.36984	0.565	0.811057	0.312104	0.243551
ENSG00000115355	CCDC88A	22.63	17.1901	18.0636	28.9154	22.4097	4.22039	1.92365	21.9579	15.0735	21.1758	36.5741	36.6905	4.33568	2.59574	21.6437	11.3555	42.0989	30.7681	5.71532	2.33695
ENSG00000015133	CCDC88C	2.80985	3.63375	3.13341	6.88544	1.90849	0.733681	1.15229	4.44602	3.0039	3.12884	1.45	2.47776	1.75846	0.922485	4.76831	1.28046	4.598	4.00697	0.38476	2.04865
ENSG00000105321	CCDC9	0.815751	1.76139	0.345119	0.106521	0.254816	0.059985	0.082725	1.13448	0.22543	0.098571	0.073246	0	0.089929	0.048199	0.355818	0.096619	0.036822	0.065734	0.034001	0.064834
ENSG00000137500	CCDC90B	10.0261	16.9513	17.507	19.0644	15.3648	6.49174	5.11084	15.9304	22.9036	28.6001	31.3273	33.5582	6.5031	4.98708	12.7713	26.3301	31.445	27.8748	3.98472	4.18406
ENSG00000123106	CCDC91	3.49244	8.53326	5.67309	11.2854	7.47583	1.10881	3.21574	4.64969	5.43165	7.74553	14.0626	10.502	2.80703	1.08046	4.68762	5.71235	12.7115	8.37651	2.27357	0.157584
ENSG00000119242	CCDC92	0.035215	1.41725	0.680011	0.665175	1.16917	0.478428	0.25348	0.01022	0.740062	0.351324	1.05802	1.25301	0.299785	0.207793	0.024883	0.380616	0.710588	1.01571	0.449816	0.16236
ENSG00000125633	CCDC93	6.88124	7.03361	12.2384	6.70409	5.20399	6.23128	3.26714	7.96255	6.31642	9.48311	7.85399	7.09438	3.93337	2.7488	5.70848	9.55787	6.6784	8.96389	3.00296	1.65057
ENSG00000105248	CCDC94	1.9445	1.0575	0.856932	0.748134	0.804608	0.163341	0.112443	1.51869	1.15546	0.750109	0.341629	0.48133	0.080819	0.067665	1.26634	1.09575	0.199534	0.505378	0.045607	0
ENSG00000142039	CCDC97	1.23342	0.548143	1.5115	0.408176	0.404001	0.175919	0.692018	0.66397	0.422051	0.226869	0.184875	0.303353	0.138527	0.058768	0.459837	0.945543	0.178441	0.446616	0.589772	0.048975
ENSG00000204536	CCHCR1	3.03834	3.54699	1.83569	0.2729	0.251646	0.300391	0.693172	2.37861	1.50898	1.3748	0.29685	0.315714	0.224965	0.164113	2.03512	1.50348	0.067021	0.208943	0.327212	0.079891
ENSG00000187094	CCK	0.04885	0	0	2.91189	7.57163	0	0.094225	0	0	0.168974	3.49164	3.60445	0.051556	0.130145	0.144078	0	2.9642	4.34536	0	0.051338
ENSG00000110148	CCKBR	2.58876	0.3384	0.382984	0.148293	0.267236	0.077778	0	2.22065	0.350637	0.410394	0	0.27604	0.242527	0.033731	2.39734	0.257123	0.149448	0.268575	0.04547	0.043351
ENSG00000275385	CCL18	0	0	0	0	0	0.932333	2.46847	0	0	0	0.282497	0	3.27767	2.5949	0	0	0	0.498774	1.21499	3.86926
ENSG00000108691	CCL2	0.524995	0.737498	1.1501	0.132202	0	14.6389	17.0471	0.526784	1.22341	1.73995	0.265029	0.52848	22.6614	15.7457	0.283934	1.26828	0.266463	0.120001	14.2958	17.0234
ENSG00000108700	CCL8	0	0	0	0	0	0.503223	1.17705	0	0	0	0	0	1.9556	0.500685	0	0	0	0	1.15839	0.640748
ENSG00000136280	CCM2	1.16445	0.5426	0.265706	0.520552	0.328871	0.498718	0.044928	0.67591	0.357721	0.240749	0.182232	0.206233	0.065916	0.075487	0.53726	0.292209	0.043827	0.23549	0.171037	0.1094
ENSG00000101331	CCM2L	1.12915	0.154823	0.147273	0.050394	0	0	0.037971	0.84963	0.037816	0.090639	0	0.040529	0	0	0.896381	0	0.050787	0	0	0
ENSG00000133101	CCNA1	0.278738	0.133591	0.124674	2.17763	1.95481	0.709836	1.40489	0.35329	0.283249	0.081428	2.98473	4.92162	0.773779	0.802717	0.276118	0.119129	2.46971	2.83252	1.0462	0.954504
ENSG00000145386	CCNA2	69.0441	68.7072	72.4271	7.92752	5.31998	6.40207	3.76332	70.1924	72.8825	84.5592	4.30064	8.18471	8.9335	4.95686	70.5272	61.4113	10.4322	8.08239	7.52184	4.58168
ENSG00000134057	CCNB1	118.372	100.551	94.7256	12.0882	11.0767	7.81555	6.08208	132.656	126.705	132.141	8.40748	18.5554	11.2375	6.67315	135.684	116.745	12.2263	16.5386	8.74145	6.03552
ENSG00000100814	CCNB1IP1	68.4127	73.665	76.2423	41.6909	32.3505	8.08985	10.8502	80.6708	90.2028	90.2753	34.2642	40.555	15.3487	5.04182	82.446	102.859	5.31426	31.8541	15.1159	2.69566
ENSG00000157456	CCNB2	57.9511	51.2752	45.3689	5.67153	2.97659	3.47651	1.51001	66.5082	60.6616	64.9076	4.15915	5.26406	3.61971	1.88523	59.7346	61.1239	5.15281	4.93247	4.95353	2.33814
ENSG00000112237	CCNC	64.1816	39.3949	43.6208	28.7257	15.5951	5.93201	11.7553	66.5594	38.2725	40.366	12.9098	25.0007	14.7047	11.1936	77.2846	33.4969	33.4998	19.4596	13.3363	12.6095
ENSG00000110092	CCND1	20.2646	28.8688	26.1866	5.17153	4.52468	7.56725	11.7634	19.2669	26.4591	27.6632	3.65168	5.05539	11.3642	24.4019	18.2938	22.7021	4.26145	5.16422	8.99778	10.0914
ENSG00000118971	CCND2	27.4813	79.0927	62.5045	31.4531	26.9788	20.0081	13.3664	19.9527	57.5391	59.0447	28.7339	19.5239	16.844	10.9606	23.1583	55.1125	24.4875	33.3888	22.7822	9.4491
ENSG00000112576	CCND3	0.600803	0.142291	0.328558	0.109748	0.406077	0.234215	0.032295	2.03821	0.539553	0.115386	0.0788	0.080683	0.103195	0.036465	0.652001	0.109984	0.041679	0.103958	0.028446	0.032343
ENSG00000166946	CCNDBP1	3.80824	12.7489	8.59596	9.9341	12.6073	2.04477	1.43458	5.4954	10.0275	18.5365	20.3141	12.2631	4.13083	2.75672	5.28663	12.6922	8.18932	20.4364	1.69569	1.56201
ENSG00000105173	CCNE1	14.8379	8.01728	5.2006	1.41661	1.41273	0.989455	0.61622	18.6365	7.61612	7.22935	2.48685	1.46556	0.715386	0.376132	16.1518	8.39773	1.65906	1.29018	1.19112	0.136311
ENSG00000175305	CCNE2	1.13482	7.64695	4.1035	0.251	0.343896	0.352624	0.796986	0.997389	9.34126	6.28796	0.190287	0.527823	0.529276	0.260813	1.16438	3.70617	0.762184	0.586759	0.481623	0.209551
ENSG00000162063	CCNF	7.07667	5.5099	5.45179	0.409937	1.24198	0.340812	0.184336	6.40001	4.9217	4.29977	0.763893	0.777452	0.282906	0.304102	5.94496	3.50991	0.4165	0.602295	0.216933	0.151367
ENSG00000113328	CCNG1	363.359	446.367	398.416	107.033	87.9762	47.4255	56.6436	337.846	372.833	453.214	146.274	126.837	89.7164	56.2999	475.295	422.351	170.476	116.969	75.4504	69.4278
ENSG00000138764	CCNG2	2.737	12.1628	10.7627	17.0153	15.3278	3.17136	1.58409	2.37396	14.9478	18.3424	17.9933	18.3697	3.85065	1.98375	1.87028	9.72457	23.2901	23.2005	3.04845	1.72816
ENSG00000134480	CCNH	16.4884	12.4784	14.9311	9.90683	7.83444	3.05925	4.50281	14.5217	9.5267	19.5332	6.44742	9.43227	8.52332	4.93524	18.8467	36.7493	17.0398	6.33148	6.65048	2.98846
ENSG00000118816	CCNI	79.143	134.308	104.481	193.171	154.857	46.7559	39.59	83.5383	88.5278	117.4	225.782	233.115	49.1043	44.701	61.6168	88.9557	257.391	220.892	53.9167	40.2511
ENSG00000107443	CCNJ	14.1021	27.85	27.9093	20.4177	16.6728	2.95019	2.62152	13.3276	28.79	29.0929	21.818	22.6944	3.82722	3.18215	13.3003	21.8317	23.9488	22.9361	4.50683	2.56139
ENSG00000135083	CCNJL	3.22116	2.44835	1.86918	1.54538	1.95819	0.403324	0.311947	4.23447	2.6256	2.0743	1.13239	2.33151	0.428557	0.304631	3.40885	2.40262	1.22868	1.83786	0.456784	0.366727
ENSG00000090061	CCNK	3.55983	7.49955	2.16438	3.48196	1.74949	0.94937	0.463727	2.48214	1.36526	1.29023	2.32657	0.82205	0.550822	0.487485	2.39845	1.79725	0.710943	0.91663	0.789045	0.285616
ENSG00000163660	CCNL1	7.42258	15.1551	13.221	11.8546	10.3379	8.34902	6.99515	10.2934	8.20665	16.5239	12.5051	10.4885	11.8494	5.79317	11.5601	10.9158	10.8874	8.85101	8.59714	6.91266
ENSG00000221978	CCNL2	7.52098	8.49077	9.22191	7.88542	6.09389	4.83979	5.58007	8.03556	14.3467	8.88816	8.10723	11.2093	5.78074	4.27644	9.42864	8.96357	6.69818	4.94603	5.44184	3.64515
ENSG00000152669	CCNO	0	0	0	0	0	0.164094	0.750437	0	0.056926	0	0	0.043909	0.296525	1.11536	0.054805	0	0	0	0.201536	0.60889
ENSG00000262919	CCNQ	2.39853	3.04995	6.33793	0.978147	1.52415	0.686351	0.61266	4.5469	3.68823	3.06016	1.02427	1.6272	0.554919	0.467447	2.11523	1.74914	0.689581	2.35999	0.49126	0.46305
ENSG00000129315	CCNT1	17.9307	18.3833	14.8293	11.5313	11.0025	5.14903	4.10611	15.0396	15.2745	22.8118	14.2518	18.2629	6.86305	4.50732	16.6364	14.3776	19.1048	18.8347	5.53091	4.43039
ENSG00000082258	CCNT2	13.6884	19.2132	19.1694	16.4731	16.0681	3.79987	4.28975	14.5748	17.4961	16.7941	17.3653	19.5017	5.09179	4.37871	14.0135	10.965	31.4304	16.5763	4.43466	2.66668
ENSG00000108100	CCNY	11.3291	12.517	1.08494	7.12552	8.57864	6.47756	1.10512	12.0901	10.2368	11.7754	0.706948	1.8027	1.30831	0.827574	11.564	1.77306	2.1122	9.09044	0.624994	0.200795
ENSG00000163249	CCNYL1	6.86202	6.84545	6.50084	2.90294	1.87034	1.75914	0.891552	4.48508	3.76846	6.81139	2.5701	2.30614	1.58708	0.913018	4.68428	2.87057	4.42219	4.65508	1.6506	1.16751
ENSG00000103540	CCP110	3.30949	13.368	9.93831	12.2929	10.8868	2.88484	2.12852	4.00208	10.9327	12.6683	15.4043	13.7997	2.10285	1.92577	2.97471	8.44997	17.5956	13.1678	3.93602	1.72539
ENSG00000260916	CCPG1	1.73178	3.31678	2.4693	2.86154	4.4435	2.6695	9.01936	2.45339	4.90568	9.81158	5.99903	3.4564	3.25563	2.32292	1.34868	2.34809	4.93373	2.93422	3.2887	3.03254
ENSG00000173992	CCS	4.64108	4.06027	2.23575	0.283504	0.725723	0.649928	0.672999	7.234	3.82019	1.0612	0.211811	0.341185	0.380726	0.366329	3.02851	6.22426	0.102495	0.272026	0.097593	0.188184
ENSG00000154429	CCSAP	5.69984	6.04505	8.34177	9.64001	7.92021	2.13698	1.78659	7.0273	5.30126	6.38039	12.5154	11.2162	2.54599	2.0442	6.23727	5.42307	11.1873	12.3187	2.44161	1.99302
ENSG00000184305	CCSER1	0.005215	0.019603	0.016986	4.4081	3.38328	0.308734	0.342534	0.006546	0.01613	0.293308	1.51285	0.672397	0.081897	0.250444	0.052617	0.022586	7.01443	6.95437	0.143192	0.240489
ENSG00000107771	CCSER2	0.830608	1.59758	1.41773	9.80207	6.12726	1.04142	1.66732	0.862775	1.44062	1.79383	17.2178	4.65467	0.844785	0.736403	0.822541	1.40159	3.67941	29.791	1.26163	0.673957
ENSG00000166226	CCT2	233.8	256.54	306.967	216.005	201.713	27.258	41.6637	327.855	290.954	306.357	258.584	251.883	45.2508	35.2007	266.604	335.348	215.966	220.886	35.312	36.785
ENSG00000163468	CCT3	180.193	112.471	108.308	62.6759	69.1305	19.0246	16.1694	184.648	199.44	129.327	55.1598	69.972	27.7102	18.9317	203.846	154.863	38.3326	72.4186	20.9432	13.9757
ENSG00000115484	CCT4	156.739	124.689	133.722	62.3565	56.559	21.0647	26.2081	180.511	159.08	178.743	83.2305	92.7847	36.873	29.2375	190.858	177.161	90.2846	87.9655	33.7752	30.5333
ENSG00000150753	CCT5	139.346	105.202	146.899	84.8044	41.8504	12.2175	13.0696	219.055	142.282	116.181	78.2078	73.4535	16.184	13.7366	233.122	111.373	54.1263	50.7767	10.4424	10.976
ENSG00000146731	CCT6A	162.298	165.648	122.346	122.713	74.6392	22.1373	21.427	202.027	133.433	149.196	108.245	114.414	31.1757	19.8349	188.995	117.432	82.0851	106.275	27.5547	19.3752
ENSG00000132141	CCT6B	0.563546	1.06461	2.27818	0.614848	0.805045	0.437757	0.334988	0.393828	1.11867	1.1106	0.901237	0.654415	0.456766	0.436102	0.67414	1.05272	1.45603	0.947466	0.554863	0.533261
ENSG00000234585	CCT6P3	1.03359	2.17737	2.26986	2.42314	2.77378	0.660135	0.578606	0.788662	2.35821	2.04451	3.20844	2.84116	0.685966	0.51083	1.10764	2.34881	3.37596	2.83696	1.02991	0.353073
ENSG00000135624	CCT7	119.079	24.9563	68.8728	48.4578	51.411	15.4437	17.1575	155.223	84.8005	66.1164	36.6412	45.8976	22.3031	15.5387	138.841	84.4561	26.1336	45.9931	11.4463	11.945
ENSG00000156261	CCT8	176.014	173.885	171.063	127.987	108.818	35.8989	37.2824	209.917	170.521	202.273	147.582	164.003	49.1272	44.3204	184.696	200.063	189.489	172.166	49.9996	43.0783
ENSG00000122674	CCZ1	27.7026	22.0467	30.3779	19.7192	8.01056	6.55598	5.57376	35.8594	22.0819	20.724	24.0868	27.9941	9.45425	6.10502	35.4683	29.1773	23.7006	20.9377	8.11869	3.69524
ENSG00000146574	CCZ1B	16.8581	16.2191	22.0299	13.6972	11.1548	5.64351	3.99436	25.8096	19.7767	22.1188	17.8078	18.8841	8.30391	5.1814	21.3497	21.0238	18.3306	17.6837	8.06475	3.88368
ENSG00000156535	CD109	2.30634	0.239034	0.146301	0.05494	0.013287	0.970825	0.671473	1.55235	0.184789	0.108571	0.068735	0.078078	0.775392	0.796941	1.53555	0.343476	0.193993	0.061994	0.911692	0.678934
ENSG00000177697	CD151	7.02308	1.11949	1.24346	0.672684	1.79673	0.306284	0.458307	5.65015	1.8504	0.370059	0.648331	0.517134	0.71275	0.224216	4.47449	1.00586	0.406057	0.942017	0.145448	0.218876
ENSG00000177675	CD163L1	0.025915	0.050576	0.062927	0.331383	0.934183	0.054325	0.048256	0.013437	0.480836	0.032327	0.405855	1.09469	0.016758	0.033841	0.027786	0.043642	0.260818	0.189731	0.015358	0.012614
ENSG00000135535	CD164	44.4568	31.6057	28.5832	21.1153	23.975	38.6592	36.8853	43.1907	25.576	35.8814	15.7825	26.209	57.7566	29.6589	46.8915	9.90083	27.7429	19.3512	62.6958	34.4581
ENSG00000158473	CD1D	0.408674	0	0.169104	0	0	0.625365	0.435997	0.709772	0.045708	0.204011	0	0.141963	0.556014	0.520716	0.764359	0	0.051901	0.052313	0.527253	0.357604
ENSG00000091972	CD200	7.23502	4.5976	4.87868	42.2275	9.76508	0.86291	0.738882	9.16425	5.00283	11.8955	12.6685	16.3925	0.869555	2.24713	11.4299	10.1574	27.7791	10.9257	1.10581	0.640639
ENSG00000150637	CD226	0.013361	0.034655	0.022291	0.028706	0.019617	0.043501	0.011834	0.004759	0.026351	0.023632	0.023526	0.01316	0.012014	0.014085	0.008914	0.003827	0.032535	0.031974	0.027147	0.005161
ENSG00000272398	CD24	2539.2	689.697	663.265	1254.59	1020.25	102.476	129.906	2694.17	430.206	532.429	1571.94	1490.91	234.471	86.9416	2403.23	411.792	1134.89	1441.5	206.882	93.4595
ENSG00000103855	CD276	5.68016	2.60431	2.4928	1.752	3.26808	1.86752	1.82935	3.93677	2.97188	3.0607	3.25239	1.6848	1.66476	2.89039	26.4742	4.49633	0.501063	3.15832	2.55041	1.94575
ENSG00000215039	CD27-AS1	1.50041	1.25963	0.705309	3.48147	4.55447	2.49442	0.40202	1.22506	1.78632	1.33771	2.36841	3.43195	0.939352	0.967957	0.649904	0.505868	2.07714	2.4823	1.92422	1.80472
ENSG00000198087	CD2AP	29.0146	7.37638	8.03711	5.82016	5.04596	9.66083	6.19552	27.266	7.96589	8.7165	4.42851	4.19427	7.44964	6.08768	27.0546	5.99653	6.62663	5.18179	9.63669	5.3617
ENSG00000169217	CD2BP2	8.55782	9.54158	9.23125	4.26321	8.38378	1.50657	2.04408	11.882	9.84914	5.06642	2.23785	3.11764	1.3811	1.53809	9.99149	6.68701	0.654661	3.21923	0.643444	0.686374
ENSG00000241399	CD302	0.302432	1.11337	0.780779	1.83541	1.51639	7.88688	12.9305	0.36391	0.757882	1.14913	1.02682	3.28798	8.12914	10.4281	0.496806	0.722711	2.48874	2.49579	10.2972	10.8672
ENSG00000167775	CD320	1.66578	1.21472	1.1973	0.507278	0.772922	0.104389	0.041846	1.52333	0.880101	0.462128	0.231857	0.323726	0.094418	0.108552	1.10419	0.228245	0	0.260881	0	0
ENSG00000135218	CD36	0.001797	0.022695	0.026224	0.5022	0.046598	48.075	27.866	0.004026	0.01959	0.378757	0.079175	0.060602	59.2061	39.0428	0.007239	0.019682	0.077922	0.056287	58.1137	42.17
ENSG00000004468	CD38	0	0.043785	0	0	0.018352	0.276767	0.028803	0.045453	0.030196	0.034036	0	0.046504	0.151535	0.005618	0.058285	0.050043	0.018975	0	0.175227	0.050706
ENSG00000117877	CD3EAP	3.86395	1.37252	0.863558	0.412012	0.520587	0.414819	0.239068	3.88394	1.20859	0.627429	0.529004	0.317928	0.205537	0.172701	4.36973	1.31605	0.211738	0.318721	0.033305	0.063192
ENSG00000010610	CD4	0.332726	0.595801	0.275476	0.100901	0.095672	0.102038	0.09508	0.429628	0.586988	0.463545	0.025097	0.01973	0.061525	0.03457	0.399082	0.845919	0.025232	0.114082	0.093665	0.022104
ENSG00000101017	CD40	1.72064	0.453471	0.252114	0	0.049783	0.210679	0.190474	2.07792	0.809332	0.372552	0.051196	0.124056	0.126775	0.187829	1.45594	0.475132	0	0.045708	0.304313	0.269183
ENSG00000026508	CD44	0.252416	0.442895	0.176612	0.667096	0.205979	5.25082	2.89116	0.33393	0.137883	0.04634	0.324864	0.139188	7.02654	2.74699	0.676899	0.051016	0.326515	0.176328	5.58765	2.5879
ENSG00000117335	CD46	22.2832	25.1604	19.3047	18.1191	16.2156	18.9848	18.1289	18.4625	24.356	22.3068	25.6468	17.3447	20.9964	11.0367	23.6811	22.9772	27.6833	20.3115	22.4239	13.2648
ENSG00000196776	CD47	4.58916	32.564	34.5324	8.86461	19.4581	8.55088	3.93576	7.45141	32.1762	33.2227	25.0699	25.2284	6.54366	4.68291	2.41435	11.8351	38.2588	25.8964	8.31377	3.58355
ENSG00000196352	CD55	3.84978	1.68828	1.87758	1.75714	1.94523	1.43578	1.53776	4.95457	1.69122	2.30713	1.88146	2.02453	1.5442	1.17733	3.88773	1.88758	2.12087	4.98342	1.79403	1.42657
ENSG00000116815	CD58	1.14248	1.95456	1.88846	1.02585	0.218015	0.690077	0.592245	1.90511	3.63466	2.8468	1.03633	1.73208	1.09834	0.712223	1.73374	2.52618	0.702612	0.569811	1.00951	1.17163
ENSG00000085063	CD59	33.5079	27.3983	7.60299	26.9782	15.8187	18.2084	30.5335	24.7873	27.3218	19.1547	60.9156	46.7672	32.5052	19.3534	37.1421	40.4803	35.1832	23.2769	23.4272	14.3755
ENSG00000135404	CD63	111.734	63.9863	62.8177	46.4173	39.5706	58.5131	50.3727	103.914	80.621	75.4562	34.3982	38.1136	81.1361	62.1267	119.399	75.3755	10.9052	36.2028	47.6102	21.9966
ENSG00000019582	CD74	2.06167	1.12514	0.98447	0.37542	0.679465	0.647168	0.307356	2.64836	1.17261	1.0379	0.302169	0.182988	0.706899	0.257889	2.13105	0.835005	0.144937	0.136436	0.208928	0.032979
ENSG00000110651	CD81	14.2422	9.1044	7.90936	0.585066	2.25243	0.74173	3.90179	17.2919	3.48769	2.43396	0.669908	0.729183	5.10139	4.35208	13.2803	1.33375	0.047349	1.8532	0.215063	0.620918
ENSG00000085117	CD82	0.037985	0.117281	0.169002	0	0.004389	0.041424	0.037423	0.108028	0.078104	0.085589	0.004741	0	0.048455	0.04046	0.108024	0.085151	0	0	0.020721	0.004016
ENSG00000112149	CD83	1.80655	2.55684	2.3095	1.29472	1.25848	0.953425	0.753999	1.65701	2.59851	4.1678	0.801751	1.81696	1.44431	0.858237	2.15926	2.90395	0.861837	1.40795	0.972787	0.835511
ENSG00000172116	CD8B	0.115278	1.07678	0.7315	0.029569	0.028251	0.000725	0	0.113378	1.24395	0.69909	0.029639	0.072064	0	0	0.03373	0.538295	0.029799	0.026468	0.027381	0
ENSG00000010278	CD9	32.5959	5.0738	3.64524	1.43455	4.84666	9.34465	16.1155	37.1122	5.06247	5.16468	0.180462	4.42229	14.1562	10.1393	36.5215	0.740312	0.453295	0.540792	10.8671	8.14086
ENSG00000002586	CD99	15.9106	31.1076	14.8972	13.6967	18.8746	15.4939	12.6409	13.923	32.9814	14.5086	2.70361	4.85493	17.7854	7.88479	19.5014	27.1032	2.66701	11.435	3.6121	2.80542
ENSG00000102181	CD99L2	1.2408	6.3631	5.9191	6.24043	6.41085	1.22729	1.3686	1.12276	6.21767	5.28785	3.94694	5.37065	1.10661	1.2595	1.26758	6.22667	1.45055	3.45977	0.785466	0.797412
ENSG00000223773	CD99P1	0.803467	0.499649	0.377981	0.131888	0.104745	0.336592	0.15744	0.737981	0.34663	0.33455	0.088943	0.146852	0.321757	0.058987	0.610828	0.172073	0.083878	0.116548	0.26852	0.149096
ENSG00000102543	CDADC1	0.501482	1.62596	1.68121	2.51976	1.74355	0.736418	0.883384	0.520043	2.80984	2.30449	3.1883	2.25566	0.824616	0.628022	0.664457	2.39409	2.91305	2.65752	0.83877	0.953334
ENSG00000140326	CDAN1	1.15632	1.8147	2.09745	1.00398	0.970698	0.544144	0.440185	1.48022	1.9328	1.39365	0.732545	1.45348	1.10526	0.600977	1.37035	2.34466	0.469024	1.04912	0.719333	0.218668
ENSG00000151465	CDC123	77.8333	52.2273	52.1993	30.5454	26.1714	5.35018	5.03968	85.4014	56.6676	64.0388	35.8423	31.3549	9.86872	7.53961	71.7821	54.5369	32.5434	32.0432	6.68879	7.18512
ENSG00000079335	CDC14A	2.97131	6.62956	3.50535	2.00584	1.38314	1.22779	0.434331	2.9674	5.84661	6.96184	1.01327	1.91288	0.653994	0.568404	1.33289	6.73388	2.22211	1.44854	1.11231	0.601969
ENSG00000081377	CDC14B	13.5261	4.07913	1.48864	2.08406	0.769708	0.955154	0.947721	15.9704	4.41197	3.84215	1.44609	2.73853	2.34226	0.752422	11.5407	1.22828	3.86744	1.01951	1.02237	1.5464
ENSG00000130177	CDC16	14.7454	18.0034	13.2259	7.93344	7.25572	5.75826	3.30154	19.7934	10.0035	18.4108	9.15178	16.6386	6.12162	6.5739	13.2995	12.1725	8.0853	14.4191	8.57876	3.95588
ENSG00000117399	CDC20	27.9315	17.834	14.6124	0.830961	4.68136	1.13683	1.94483	30.1733	18.8121	13.3344	0.439227	2.77863	0.632426	0.902093	29.1956	13.827	0.117331	0.754133	0.350673	0.03558
ENSG00000164287	CDC20B	0	0	0.016764	0.086616	0.033431	1.45673	2.7641	0	0.064896	0.026858	0.088196	0.196881	1.2196	6.28694	0	0.045582	0.069832	0.112729	1.8036	1.96094
ENSG00000094880	CDC23	21.634	26.6299	24.7648	9.30842	7.79074	4.37407	8.06195	23.3487	29.0227	30.5301	15.9017	17.5283	5.56675	6.57334	23.6029	26.1503	13.5302	16.2475	10.827	8.12675
ENSG00000164045	CDC25A	21.3512	11.8319	13.8473	5.97282	5.06635	1.0306	0.67642	22.8024	13.341	15.7875	5.36198	5.25173	1.74107	0.546642	23.0998	16.6527	5.12693	6.22899	0.99492	0.675431
ENSG00000101224	CDC25B	1.90663	2.99945	3.17578	1.58807	1.06551	1.97973	0.8314	1.99753	3.09167	2.17964	0.777689	0.409063	1.36765	0.968492	2.08191	2.27855	0.389977	0.459309	1.99876	0.319813
ENSG00000158402	CDC25C	14.7445	17.6447	19.3765	0.901932	0.840173	1.09388	0.517065	18.0321	27.3754	20.2988	0.449719	1.44357	0.842683	0.492891	16.9551	18.4869	1.21726	1.81521	0.813821	0.501196
ENSG00000176386	CDC26	19.5224	18.7163	19.493	9.00518	9.6572	0.692149	4.30804	22.3071	20.178	21.965	11.9164	12.6158	5.50892	0.670283	18.5214	17.6206	1.65052	12.9082	4.41503	5.61376
ENSG00000004897	CDC27	20.284	34.0252	36.041	17.8737	18.2259	8.14769	5.69144	27.8972	38.9984	35.2234	28.6367	23.6757	12.6715	8.09069	30.5929	24.1167	28.5227	27.454	8.8102	7.92225
ENSG00000099804	CDC34	8.56926	4.69325	6.84577	2.9606	2.92211	2.52072	1.58709	11.144	7.99648	3.25099	1.19659	3.03025	0.94059	0.696938	7.40062	5.10642	0.129571	2.43258	0.239896	0.111238
ENSG00000105401	CDC37	15.3095	12.3921	5.68654	5.36067	7.81529	2.16642	1.52304	19.2022	12.219	5.17661	1.6016	2.40947	1.58971	2.12899	13.9792	5.60856	0.735773	2.70302	0.732474	0.885043
ENSG00000106993	CDC37L1	6.2611	5.11175	4.062	8.55283	6.98989	1.75138	2.86313	8.47211	5.43609	5.29412	10.8108	9.51435	2.68599	2.55853	7.62732	3.5866	8.91149	8.64388	3.01544	2.96327
ENSG00000168438	CDC40	11.9842	14.4199	14.8533	5.66098	5.93522	2.78686	5.00955	13.8856	14.1443	15.8461	4.11232	8.69712	5.00783	4.0225	13.658	13.6782	4.5189	4.06261	3.49491	2.08798
ENSG00000070831	CDC42	85.032	132.334	84.3946	222.194	60.8366	4.93914	23.8525	145.386	90.263	18.5739	168.736	151.198	5.4328	3.46463	117.401	19.9244	82.34	207.731	43.718	6.23922
ENSG00000143776	CDC42BPA	10.1222	10.5015	9.02242	12.5956	11.2687	3.8572	3.13701	8.33122	8.92952	9.89689	17.5704	15.3947	5.32841	4.24926	8.56481	12.8104	20.9469	15.2764	8.35722	2.57782
ENSG00000198752	CDC42BPB	10.5422	8.95268	7.09461	7.06096	7.92809	4.1079	3.01404	9.47045	6.75785	6.66184	5.39197	6.13286	4.29274	2.76747	8.9259	6.41945	3.64801	7.88382	3.57781	2.69175
ENSG00000171219	CDC42BPG	0.253563	0.068868	0.060805	0	0.0529	0.045378	0.039248	0.307068	0.072509	0.044981	0.052943	0	0.041187	0.029401	0.192385	0.024202	0	0	0	0.016079
ENSG00000149798	CDC42EP2	0.329429	0.704553	0.34068	0.21449	0.271638	0.09636	0.050315	0.403944	0.334941	0.241131	0.119917	0.192073	0.17684	0.015237	0.219997	0.0624	0.093693	0.107516	0.043919	0
ENSG00000163171	CDC42EP3	2.72248	2.74525	3.4448	16.9219	14.5346	8.05258	3.90896	3.93188	2.42398	2.44775	9.39214	8.97811	6.13469	2.32567	2.42568	1.91929	10.971	9.74096	11.1538	2.40708
ENSG00000179604	CDC42EP4	1.32072	1.88637	1.69323	0.872827	1.14836	1.19306	0.776456	1.5514	1.9308	1.70175	0.925245	1.15898	1.21477	0.900995	1.27148	1.41584	0.880585	1.22346	1.20722	0.709583
ENSG00000197622	CDC42SE1	22.2059	22.5225	15.7028	23.4728	20.7892	4.5178	6.36336	26.5994	20.3378	24.0696	23.8772	25.4909	8.52262	5.71167	27.3049	16.5138	19.712	27.4705	6.07071	4.22867
ENSG00000158985	CDC42SE2	3.98598	1.08394	4.58891	0.864095	3.09011	0.523053	0.397243	5.7591	7.58206	5.92203	0.851573	3.53872	0.464978	0.863284	5.195	0.801959	0.978597	1.90839	0.552384	1.77472
ENSG00000093009	CDC45	10.1287	12.0162	9.26879	0.415936	0.664583	0.491661	0.319265	6.45312	8.89444	4.81366	0.184125	0.749101	0.829649	0.157965	7.63534	4.17446	0.544745	0.459274	1.6725	0.121325
ENSG00000096401	CDC5L	19.106	24.5571	21.0582	14.1173	13.2353	4.09792	3.73444	21.104	26.0296	26.7718	17.9386	19.4302	4.76141	4.1686	19.707	25.1118	18.1068	17.9472	5.22648	3.6176
ENSG00000094804	CDC6	21.6379	18.0291	13.8144	1.33374	1.4983	1.97901	0.937211	26.8536	25.2897	28.0096	1.10438	4.5437	1.35845	0.908796	36.6841	19.7375	1.9449	3.93655	1.62904	1.20109
ENSG00000097046	CDC7	32.7483	47.2864	39.5811	12.5203	13.1548	3.48726	1.97593	33.2383	49.2752	54.1662	13.0163	14.9191	3.38194	2.86687	33.7623	37.9352	17.1026	14.4575	4.08245	2.30534
ENSG00000134371	CDC73	12.7672	10.6717	8.37847	5.72607	4.92353	3.02012	3.34065	10.8237	8.06625	9.537	3.19046	3.1603	3.77268	2.12419	11.7846	5.8952	4.39255	4.6389	3.39776	1.844
ENSG00000184661	CDCA2	18.5312	15.4169	14.0192	1.40734	1.35816	1.32	0.661564	20.0676	15.8777	15.6214	0.738821	1.90878	1.59556	0.907546	20.6054	14.7536	2.19279	1.80251	1.95045	1.27476
ENSG00000111665	CDCA3	4.06029	3.44678	3.37196	0.346187	0.429055	0.312233	0.172343	2.38364	9.12213	6.99545	0.160191	0.333684	0.276079	0.218462	6.02467	4.4621	0.185517	0.309869	0.145761	0.101676
ENSG00000170779	CDCA4	9.23437	7.04127	8.45747	1.09981	1.38866	0.804616	0.504637	10.5523	7.03321	6.4759	0.890252	0.75944	1.21848	0.542392	8.72358	6.52578	1.15805	1.02197	0.798406	0.37007
ENSG00000146670	CDCA5	13.1446	15.7781	6.85305	0.757305	1.01666	0.677654	0.396924	22.4266	16.7761	13.982	0.330939	0.729623	0.866907	0.297528	16.0914	10.5175	0.405369	0.757021	0.46597	0.08592
ENSG00000144354	CDCA7	18.4216	13.9906	12.5778	3.13231	2.34029	1.71664	0.952837	17.8876	12.8858	13.6419	1.74459	3.33933	2.22024	0.869374	17.5552	11.5028	2.92494	2.54765	1.69667	0.970165
ENSG00000164649	CDCA7L	58.9407	23.0438	22.161	5.30891	3.26272	2.3979	1.15861	72.5173	26.6643	19.7402	1.47089	3.78025	1.90935	1.77661	64.1119	23.0281	3.31116	4.14563	1.73795	1.18833
ENSG00000134690	CDCA8	11.655	15.8171	13.6197	1.73826	1.76548	1.12737	0.805654	13.3411	14.8672	17.0675	0.588024	1.62187	1.16949	0.585428	12.9012	15.8709	0.585885	0.911057	1.37297	0.323521
ENSG00000163814	CDCP1	2.04706	0.07698	0.058358	0.464217	0.21363	0.697682	0.525343	2.17708	0.047795	0.090358	0.162067	0.08138	0.790507	0.50675	1.76741	0.02636	0.241286	0.200875	0.966775	0.420627
ENSG00000039068	CDH1	51.3161	2.01972	1.92223	2.17179	2.1807	3.70759	2.06014	60.277	2.16513	2.29213	1.37045	1.67664	2.27926	5.20054	26.7913	1.81003	1.85019	2.65185	1.98628	1.17283
ENSG00000040731	CDH10	0.412835	1.46907	1.14454	0.604116	0.661482	1.26331	0.937749	0.264921	1.95437	2.0919	0.360613	0.437524	2.04183	0.99881	0.407134	2.15579	0.393438	0.310113	1.73991	1.29233
ENSG00000140937	CDH11	0.741485	0.843559	0.554799	1.34684	1.33711	5.40507	7.20168	0.509018	0.876718	1.10555	0.877989	1.14586	15.0013	7.78156	1.01069	1.24114	1.15981	1.15478	9.84761	6.3183
ENSG00000154162	CDH12	0.000521	0.004975	0.005055	0.053751	0.037883	0.07329	0.021162	0.001324	0.008373	0.004605	0.029703	0.03529	0.046402	0.0175	0.002029	0.001729	0.062338	0.035729	0.080081	0.009986
ENSG00000140945	CDH13	0.010895	0.011882	0.004414	1.24487	0.537023	0.33912	0.581722	0.010821	0.005389	0.009018	1.02313	2.89925	0.108484	0.084016	0.00798	0.007168	0.13333	0.644861	1.87445	0.444191
ENSG00000079112	CDH17	0.052741	0.333113	0.257423	1.10552	0.841032	4.70884	3.99694	0.054693	0.31942	0.57268	0.371833	1.24316	7.52891	3.75603	0.051338	0.176535	1.62387	0.882229	5.94618	4.87752
ENSG00000145526	CDH18	0.002246	0.01089	0.016558	0.061142	0.218866	0.173637	0.011667	0.003881	0.008122	0.027389	0.068959	0.05219	0.07821	0.022315	0.000729	0.025071	1.03018	0.066857	0.131908	0.010954
ENSG00000071991	CDH19	0.011259	0.445645	0.880763	0.901328	0.670098	0.046142	0.053646	0.021039	0.262719	0.667946	0.535898	0.900403	0.058708	0.012546	0.010851	0.758214	1.14159	1.08104	0.013345	0.012723
ENSG00000170558	CDH2	0.60588	110.018	86.1296	3.47177	68.5576	1.31287	29.4575	4.79674	104.777	86.5869	82.8504	89.7597	7.39309	2.16822	0.589483	77.4475	79.2723	110.969	1.30507	0.871721
ENSG00000101542	CDH20	0.010082	0.024461	0.016529	0.007352	0.010308	0.052492	0.012251	0.003978	0.012103	0.026359	0.009866	0.017322	0.008707	0.016236	0.004978	0.011098	0.007409	0.013367	0.030692	0.005686
ENSG00000107736	CDH23	0.053246	0.027608	0.016357	0.005521	0.00276	0.035157	0.045337	0.065954	0.02684	0.017761	0	0.002324	0.013454	0.020297	0.05422	0.009873	0.002854	0.005146	0.007945	0.004699
ENSG00000139880	CDH24	0.836448	1.00367	0.35713	0.102612	0.269524	0.086662	0.185033	0.731012	0.694318	0.536607	0.035215	0.142417	0.083913	0.048266	0.773458	0.264515	0.021383	0.222014	0	0
ENSG00000124215	CDH26	0.158081	0.31132	0.234358	0.186295	0.39584	0.171647	0.112156	0.104157	0.287755	0.275225	0.279456	0.287473	0.104955	0.038391	0.127364	0.341929	0.382742	0.249299	0.086254	0.063998
ENSG00000062038	CDH3	16.8349	1.70742	1.7263	0.830509	0.716956	0.586885	0.549037	22.3808	1.92928	1.13332	0.412694	0.5317	0.564328	0.378747	20.5098	1.40167	0.243983	0.57173	0.489455	0.330211
ENSG00000179242	CDH4	0.042744	0.037182	0.038757	0.026191	0.048295	0.066125	0.018277	0.042891	0.041458	0.033096	0.029173	0.038805	0.020092	0.01728	0.033824	0.03708	0.019035	0.037873	0.037181	0.010164
ENSG00000113361	CDH6	4.23914	36.4325	34.9815	8.0333	6.07312	13.6773	12.4139	3.48372	39.4615	49.4543	12.0868	15.3733	10.9826	12.7986	3.08003	50.8215	9.74612	9.69103	16.321	7.21582
ENSG00000081138	CDH7	0.112387	0.297991	0.640992	0.621343	0.544757	0.135371	0.251016	0.107294	0.312881	0.366282	1.24543	1.13146	0.526115	0.058527	0.120785	0.25068	0.87939	0.844887	0.181722	0.11462
ENSG00000150394	CDH8	0.900763	1.04286	0.961088	7.55219	18.8549	0.474606	0.741782	1.77693	1.1782	0.901117	18.7578	16.5322	0.072208	0.731678	1.58373	0.959143	6.98585	13.5391	1.68184	1.1898
ENSG00000113100	CDH9	1.48331	0.094822	0	0	0.060161	0.077536	0	1.82797	0.024746	0.140168	0.188104	0.114652	0.025575	0.02152	2.12424	0.041217	0.031572	0.082445	0	0
ENSG00000148600	CDHR1	0.943635	0.115493	0.03256	0.643905	0.466745	0.056785	0	0.388004	0.067862	0.015284	0.377841	0.297274	0.028305	0.023583	0.366149	0.022471	0.311034	0.571322	0	0.015079
ENSG00000128536	CDHR3	0.112235	0.265659	0.372056	0.107805	0.125783	1.56444	1.4598	0.209638	0.400536	0.130292	0.140832	0.110978	2.28112	0.585796	0.160462	0.327809	0.374541	0.102792	0.532845	0.140565
ENSG00000089486	CDIP1	4.03618	0.681391	0.424867	0.296313	0.56898	0.233678	0.200265	1.04684	0.55628	0.46253	0.162076	0.249954	0.133439	0.106283	5.07397	0.480944	0.098086	0.25014	0.125723	0.077022
ENSG00000103502	CDIPT	6.51006	3.0457	2.97097	4.04762	4.00701	1.60535	2.3233	6.19267	3.2493	3.22564	1.55557	2.6441	0.929329	0.653532	6.15186	2.27795	1.7635	1.89123	0.546574	0.608178
ENSG00000170312	CDK1	76.4276	83.9095	88.9118	8.32072	8.70967	13.1983	11.8763	79.9578	88.1645	108.996	3.06731	11.5286	20.014	11.3585	80.3034	84.5615	13.867	6.52618	15.768	13.3359
ENSG00000185324	CDK10	2.90188	2.36152	1.09808	0.336074	1.42834	0.280858	0.314467	2.07929	1.9857	1.54356	0.317592	0.509344	0.813059	0.68533	1.82807	2.24193	0.116878	0.305526	0.097968	0.130792
ENSG00000248333	CDK11B	2.36148	2.42039	1.51208	0.967448	1.46913	0.48967	0.563629	2.98849	1.99072	1.2869	1.41087	1.04591	0.607366	0.760018	2.64856	1.83987	0.76268	1.13717	0.542539	0.211023
ENSG00000167258	CDK12	11.2105	8.42158	9.72511	4.88648	4.54825	3.47806	1.76891	11.194	9.87421	5.03451	6.11902	5.41533	2.71986	1.88503	14.9822	10.1782	8.03285	5.4613	4.31469	1.35196
ENSG00000065883	CDK13	12.4206	13.2641	11.4427	11.9366	12.695	5.22155	3.62875	13.4828	19.7921	16.7383	8.95042	12.6902	6.07511	3.72004	11.3073	18.038	10.3611	9.30751	3.76411	5.3624
ENSG00000058091	CDK14	4.56724	6.83788	8.51794	9.22453	12.7728	3.36725	0.895338	5.17273	8.49062	10.7907	7.86141	11.7822	4.05345	2.44642	3.95558	9.07206	11.0694	9.47177	1.08297	2.00265
ENSG00000138395	CDK15	0	0.116993	0.1673	0.018089	0.018373	0.528577	0.17144	0	0.197327	0.101888	0.038362	0.015468	0.410057	0.230199	0	0.176859	0.038378	0	0.531937	0.269462
ENSG00000102225	CDK16	15.4024	7.90482	6.068	4.31457	9.79476	3.19457	3.49575	9.07397	10.0346	5.42405	1.95732	6.60457	3.0984	1.06214	11.9961	5.85431	1.35906	5.92381	0.815226	0.688318
ENSG00000059758	CDK17	15.1322	12.9826	9.41414	23.0252	15.7508	4.21419	5.45276	10.4888	10.2743	11.3267	19.935	17.541	4.48803	7.84706	11.9547	6.44427	22.0898	18.1691	6.13499	4.14271
ENSG00000117266	CDK18	1.06299	0.141376	0.043446	0.021435	0.148554	0.024986	0.031497	1.16323	0.084321	0.075196	0.010797	0.050747	0.017499	0.096386	0.772805	0.04139	0.009565	0.02873	0.009875	0.009415
ENSG00000155111	CDK19	2.05235	3.94234	4.46795	3.27042	4.42905	3.22939	2.35035	2.64997	5.02057	6.67845	4.26591	4.13715	2.32406	2.52382	1.16116	2.63284	4.15119	4.94421	3.71471	2.30552
ENSG00000123374	CDK2	13.3416	48.5223	44.1766	5.16637	6.15442	2.71543	5.1862	15.7967	34.8895	44.6774	1.68187	5.42778	4.49723	6.62404	13.1107	27.1259	7.18512	6.85071	7.68496	4.67298
ENSG00000156345	CDK20	0.141387	0.294844	0.447397	0.466206	0.332311	0.230243	0.392621	0.260412	0.37869	0.447685	0.161094	0.327945	0.321134	0.489137	0.157187	0.553773	0.25052	0.313435	0.274032	0.319145
ENSG00000111328	CDK2AP1	119.291	116.336	135.048	34.2119	30.085	7.91428	17.2288	108.152	153.746	147.02	17.1823	16.1657	5.54322	3.15516	98.089	57.6816	18.892	67.191	11.8586	3.61316
ENSG00000167797	CDK2AP2	1.32974	1.11452	0.747943	0.118166	0.376964	0.099616	0.048652	0.403865	0.65797	0.349573	0.129448	0.420697	0.052714	0.126859	0.981602	0.163962	0	0.16579	0	0.095202
ENSG00000135446	CDK4	58.8385	77.2785	51.8502	14.3457	17.8099	9.35738	8.22094	72.7397	91.333	50.7823	8.98288	13.6225	16.3861	7.46187	76.4707	62.6861	7.4015	14.0195	7.83554	5.81896
ENSG00000164885	CDK5	0.658154	1.81347	1.59825	1.68178	5.80754	0.354017	0.772009	1.79439	2.38966	1.25486	1.64798	1.21978	0.640762	0.402205	1.02534	2.37081	0.174852	1.64392	0.372758	0.360336
ENSG00000176749	CDK5R1	1.92212	3.82677	3.76983	29.0065	25.9366	0.540626	0.501031	1.76029	2.83868	2.7127	32.0353	24.3751	0.570669	0.516832	1.05538	2.38149	26.7488	40.0021	0.616587	0.236847
ENSG00000101391	CDK5RAP1	9.25277	4.93446	4.35486	3.91293	2.10007	2.33355	1.18794	11.5329	4.1456	3.76927	2.82239	3.17658	2.31295	1.24675	6.13219	7.88929	1.69039	2.31298	1.76529	1.07433
ENSG00000136861	CDK5RAP2	7.85224	8.05218	13.9819	4.33551	3.05204	1.77888	1.80749	10.9495	9.27223	13.5224	3.12226	2.96743	1.49925	1.18815	7.25803	7.69414	2.29108	7.99889	1.75119	1.00933
ENSG00000108465	CDK5RAP3	5.88594	9.63045	6.25013	1.23424	4.97936	1.55889	3.11623	8.41701	13.7965	7.32212	3.73328	2.11317	4.51779	2.66469	7.53612	10.0549	1.55348	2.55206	3.03072	1.33129
ENSG00000105810	CDK6	9.06553	16.5722	12.464	2.46429	2.27088	4.9107	3.54492	8.31259	14.1918	14.4179	1.39393	3.17207	5.19031	3.57956	7.61123	9.48506	2.40131	2.35139	5.90689	3.28299
ENSG00000134058	CDK7	25.5653	16.5901	15.388	12.9895	11.3161	4.47513	5.6753	43.1569	20.3901	18.6721	11.9076	13.8143	8.78178	5.04202	40.9823	10.0146	12.7335	14.0316	6.61506	6.08024
ENSG00000132964	CDK8	15.1045	24.1836	19.2256	10.0309	9.10451	4.42768	4.90842	10.1482	16.3455	18.5604	10.6858	15.2668	7.2096	5.24604	13.6174	15.7474	11.4763	10.7049	5.61746	3.88462
ENSG00000136807	CDK9	9.48173	7.43619	2.60703	1.97249	2.09751	1.0598	1.18105	10.9607	6.16835	5.21469	1.26975	1.89541	1.61131	2.60118	10.2969	2.11201	1.10933	1.54085	2.05994	0.722043
ENSG00000145996	CDKAL1	11.0151	15.095	12.5672	8.90723	8.58076	2.07317	2.17099	12.1186	17.7543	16.9475	7.04936	9.07182	3.9312	2.72269	10.7973	17.9983	10.1631	10.7319	2.18496	1.69099
ENSG00000100490	CDKL1	0.041385	0.050553	0.090177	0.235644	0.068799	0.041955	0.024553	0.023196	0.288722	0.046604	0.124452	0.07946	0.037562	0.036925	0.129763	0.055184	0.041091	0.092029	0.071437	0.017384
ENSG00000138769	CDKL2	0.812444	0.817274	1.7045	4.60243	4.5992	1.58415	1.09248	1.28261	1.0352	1.7385	5.71768	4.47481	1.22734	1.1108	0.579313	1.7902	5.47037	5.05403	1.818	0.880566
ENSG00000006837	CDKL3	0.149159	1.86064	0.689185	0.812673	0.626647	0.313049	0.318649	0.194005	1.22019	1.16231	2.47795	3.20673	0.30471	0.301777	0.120395	0.652508	2.05899	2.09681	0.316193	0.555872
ENSG00000205111	CDKL4	0.049109	0.416904	1.04137	1.53627	1.02721	0.518578	0.3448	0.102108	0.477164	0.428613	1.56821	1.52735	0.339205	0.605815	0.142452	0.500344	1.91756	1.19453	0.395227	0.42232
ENSG00000008086	CDKL5	1.24566	0.273804	0.259786	0.442105	0.500947	0.320162	0.183426	3.36428	0.243789	0.278836	0.691197	0.422428	0.130812	0.613704	1.23053	0.21605	0.405892	0.54739	0.321398	0.128131
ENSG00000124762	CDKN1A	0.193483	2.49843	1.24944	0.161268	0.099245	1.04753	2.24001	0.15013	1.73739	1.26619	0.043807	0.095269	1.64601	1.63534	0.133829	1.13218	0.118186	0.053077	0.704985	1.59584
ENSG00000111276	CDKN1B	11.9055	25.3904	22.9637	24.4037	19.4165	5.47684	5.04608	13.1245	21.7452	23.8405	26.9238	22.7307	6.7504	4.66256	10.7051	11.3204	28.8106	21.4329	6.31518	7.51157
ENSG00000129757	CDKN1C	3.32614	7.71761	6.45126	9.25492	9.50409	4.2988	5.20855	3.81481	5.8662	5.648	7.90535	9.94747	4.51284	3.43399	3.32353	6.78728	7.4543	8.91305	3.6842	3.02743
ENSG00000168564	CDKN2AIP	5.75185	15.4924	18.055	18.3502	9.72001	3.30539	2.6648	11.694	16.4218	11.0745	9.88204	13.8323	2.67875	1.69389	7.93972	13.6711	16.5512	14.4652	3.89201	1.37809
ENSG00000237190	CDKN2AIPNL	28.0515	18.0759	17.6557	20.7532	17.5805	2.1985	1.68107	32.1628	20.8957	17.8821	20.6139	19.7614	4.6483	1.2831	30.8937	17.358	19.861	18.4887	1.89939	1.31683
ENSG00000147883	CDKN2B	0.07605	0.049472	0.061556	0.194687	0.084942	0.869545	0.998765	0	0.025377	0.278512	0.097573	0.179142	1.18436	1.00867	0	0	0.283103	0.287366	1.23893	1.10765
ENSG00000129355	CDKN2D	0.409983	1.82373	1.64768	5.11763	5.07302	0.568179	0.437885	0.476458	1.99588	1.63695	4.11509	4.64011	0.279001	0.40696	0.197889	0.92095	3.50268	4.49492	0.079517	0.153923
ENSG00000100526	CDKN3	20.1428	21.9473	6.85656	0.707498	0.341846	0.62246	0.856667	20.9097	30.4326	33.8479	0.409561	0.906327	1.09588	0.485803	23.9009	23.6263	0.892923	0.875162	0.865339	0.896006
ENSG00000185267	CDNF	0.10814	0.229397	0.635516	0.075979	0.198899	0.344443	0.572489	0.184061	0.787948	0.703456	0.304639	0.432679	0.391825	0.629935	0.381009	0.199929	0.459431	0.618216	0.205498	0.387864
ENSG00000129596	CDO1	8.13227	17.5273	17.3409	12.0488	8.57501	13.5398	38.6984	7.47786	20.8544	23.7353	16.2638	15.367	21.6137	34.5348	7.23037	19.0225	15.1213	15.7709	18.081	33.8209
ENSG00000064309	CDON	6.11669	49.3248	39.7453	7.25714	4.8155	7.48337	11.9646	4.77915	44.0336	29.849	2.60424	5.69867	5.37294	5.71635	5.98308	54.8961	2.99995	7.16207	5.49985	3.93051
ENSG00000205643	CDPF1	1.19327	1.36838	1.17928	0.841387	0.67449	0.215106	0.212138	1.65835	1.29359	1.24514	0.655019	0.909071	0.58869	0.44934	1.69358	1.25584	0.6507	0.507895	0.30346	0.168771
ENSG00000140743	CDR2	1.94136	0.859757	3.62961	0.687201	1.61458	1.64465	0.737589	7.89339	4.36929	1.62793	0.410864	0.382314	0.428639	2.09936	5.33533	0.353196	0.816002	0.507153	0.63229	0.881535
ENSG00000109089	CDR2L	1.9947	1.0082	0.785269	0.880804	1.88095	0.301429	0.35864	2.04852	0.729539	0.627174	0.407999	0.684992	0.226648	0.347482	1.45994	0.728584	0.293535	0.862634	0.170362	0.163077
ENSG00000163624	CDS1	5.07205	2.36413	2.07631	2.97211	2.78221	2.59468	2.66307	5.75373	1.6098	1.97753	2.50532	3.25501	2.59267	2.8041	5.05668	1.701	4.96795	2.84933	4.18994	2.88375
ENSG00000101290	CDS2	14.167	14.6911	8.24898	17.4321	19.9987	3.08905	2.26955	13.2947	10.4912	11.8892	25.6506	25.1254	3.41427	2.96444	15.2612	13.8493	21.0956	27.5316	3.44828	1.8079
ENSG00000167513	CDT1	2.25778	0.375081	0.755201	0.03908	0.148578	0.03224	0.05418	2.58957	0.896445	0.38257	0	0	0	0.132347	1.92044	0.23754	0.039384	0	0.100963	0
ENSG00000091527	CDV3	59.4461	76.7473	70.9671	54.3424	57.6315	19.2566	18.86	57.7355	82.2671	99.2923	43.6329	67.5407	23.3774	27.0902	58.2905	69.5665	46.0242	75.1677	34.9304	26.3535
ENSG00000165556	CDX2	0	0.217001	0.245458	0.553485	0.39858	0.673969	0.327433	0	0.17663	0.078395	0.22382	0.461712	0.592318	0.262669	0	0.08364	0.308541	0.747148	0.271199	0.221148
ENSG00000153046	CDYL	35.1904	9.87288	8.68068	0.13977	0.168572	0.522377	0.157685	42.1752	10.1822	4.87233	1.67022	0.166296	0.213063	0.192795	37.1374	0.272618	0.125634	0.917199	1.35027	0.087296
ENSG00000166446	CDYL2	0.353707	0.910191	0.940661	0.396529	0.516586	0.324741	0.244294	0.32184	0.35835	0.420866	0.550956	0.473674	0.278476	0.200811	0.363736	0.309012	0.42891	0.590054	0.414078	0.217503
ENSG00000079385	CEACAM1	0.143393	0	0	0	0.017711	1.34166	0.845377	0.057272	0.014354	0.016424	0	0.014911	1.05705	1.0639	0.287604	0	0	0.033186	1.04466	1.14417
ENSG00000086548	CEACAM6	0	0.032564	0	0.128148	0.124482	2.90521	1.41359	0	0	0	0.042817	0.174548	4.19204	1.86441	0	0	0	0	5.05571	1.87203
ENSG00000172216	CEBPB	0.827938	0.042681	0.065142	0.26927	0	1.32517	1.15255	1.24467	0.159524	0	0	0.213333	1.14593	0.907456	0.908297	0.088567	0.067842	0.182578	1.29362	0.766727
ENSG00000221869	CEBPD	0.235691	0.360035	0.234009	0.525548	0.28071	2.1881	1.64889	0.38505	0.09551	0.162294	0.242396	0.631659	3.98311	2.62375	0.1839	0.318159	0.242501	0.094701	2.90053	2.05569
ENSG00000153879	CEBPG	12.8534	19.5402	16.5818	18.3493	15.4861	1.91457	1.70422	13.6526	20.0029	22.6092	10.3237	19.9312	2.66346	4.2032	13.4695	6.76499	10.4617	20.533	2.66787	3.56334
ENSG00000115816	CEBPZ	146.681	32.8095	33.6127	22.5277	21.2058	7.31592	7.83586	166.176	36.049	39.3778	28.5702	32.547	11.6344	7.77418	158.558	42.0824	35.1989	27.2624	8.91352	8.39651
ENSG00000099954	CECR2	2.77964	0.956107	0.757777	0.439767	0.473692	0.256375	0.086143	4.21956	1.06507	0.788775	0.379125	0.632394	0.101004	0.130793	2.70213	0.741282	0.429047	0.543041	0.223295	0.069476
ENSG00000149187	CELF1	24.5021	32.807	19.2883	21.9771	11.8194	2.05686	0.927607	24.3844	14.7852	15.5792	14.4619	14.42	1.2497	2.33792	20.0752	3.82246	3.19278	21.0157	3.37888	1.27289
ENSG00000048740	CELF2	0.494346	0.37868	0.258865	0.68066	8.81517	0.358692	0.157989	0.399034	0.232454	0.302246	0.738376	0.915689	0.14626	0.192117	0.363643	0.200278	0.753467	1.04481	0.300551	0.093605
ENSG00000159409	CELF3	0.023174	0.618393	0.13869	2.29255	3.59523	0.125265	0.132552	0.023081	0.299962	0.181335	1.12779	1.60966	0.121081	0.079891	0.022558	0.225271	0.285028	1.42768	0.10987	0.025929
ENSG00000101489	CELF4	0.365509	0.030884	0.011786	3.67163	1.02107	0.078362	0.020821	0.006106	0.018977	0.025789	28.9869	11.126	0.038767	0.023981	0.01167	0.020211	27.3355	33.2784	0.067994	0.013481
ENSG00000161082	CELF5	0.093457	0.065997	0.043474	0.516939	0.628837	0.031342	0.016811	0.084184	0.032897	0.037367	0.470072	0.414468	0.005815	0.018252	0.065334	0.053999	0.303898	0.490584	0.021079	0.003361
ENSG00000075275	CELSR1	0.582847	1.17165	1.03049	0.10113	0.11316	0.146985	0.205508	0.681995	0.958724	1.10038	0.101291	0.082978	0.178998	0.211141	0.470214	0.844072	0.095238	0.07014	0.183248	0.153096
ENSG00000143126	CELSR2	1.71292	2.69898	1.48407	0.780485	1.26982	0.330872	0.370003	1.76507	1.98776	1.29478	0.590267	0.639106	0.173493	0.284497	1.34371	1.18395	0.477386	1.07712	0.216437	0.028147
ENSG00000008300	CELSR3	1.97934	1.136	0.724403	2.19964	2.72003	0.240489	0.122708	1.7924	0.917044	0.60806	1.52889	1.50271	0.214582	0.103932	1.24298	0.690765	0.502603	1.79916	0.149063	0.066621
ENSG00000103888	CEMIP	0.024323	0	0	0.051834	0.08171	0.918175	0.725931	0.026887	0.040944	0	0.086592	0.095889	1.43328	0.895919	0.012879	0	0	0.031241	1.41984	0.680375
ENSG00000115163	CENPA	1.58257	2.21124	2.14855	0.319544	0.148701	0.345486	0.254968	6.90121	2.14075	2.18588	0.067537	0.341422	0.328811	0.158787	1.68416	1.25312	0.290268	0.213048	0.30995	0.192884
ENSG00000125817	CENPB	2.2099	4.38769	3.21922	0.918094	2.05621	0.256764	0.48527	3.4223	3.01942	1.27421	0.645567	0.850625	0.626221	0.501383	1.91198	1.46398	0.09345	0.573541	0.289052	0.081865
ENSG00000177946	CENPBD1	1.2713	1.68928	0.822961	1.45763	1.24608	0.223416	0.676943	1.73599	1.36381	1.02459	0.900078	1.39912	0.539526	0.161878	1.47485	1.43582	0.854195	1.77652	0.485702	0.549061
ENSG00000213753	CENPBD1P1	1.83942	6.10731	4.11403	2.76364	4.07765	1.98102	4.01893	2.65324	4.44607	4.06843	3.1848	3.27345	2.77074	2.33689	2.12667	5.19433	2.68784	2.99084	1.75917	2.82448
ENSG00000145241	CENPC	5.4872	9.50941	6.99125	4.243	3.71242	1.59382	2.10901	5.35404	8.29795	9.69523	4.94026	4.72986	2.71523	2.43789	6.20805	9.86904	6.08883	5.01015	3.25262	1.2059
ENSG00000138778	CENPE	25.2957	26.152	24.1853	4.42129	3.77851	4.74182	2.41006	22.9092	19.2682	29.6125	3.37624	5.38572	3.92505	2.61195	23.3115	16.1126	6.48843	5.04736	5.08384	1.94538
ENSG00000117724	CENPF	49.864	60.3512	50.1669	6.855	4.63903	3.61692	2.2422	45.9248	57.0629	67.0022	2.70535	10.0258	3.41359	3.04012	48.0166	58.7975	7.66096	8.59413	5.105	2.0841
ENSG00000153044	CENPH	49.3243	45.0575	65.8124	7.22042	7.02271	2.99632	3.41917	38.8354	51.9211	56.9429	4.03852	6.66046	4.45425	2.86118	48.0366	40.5171	7.26433	4.88652	2.70907	2.70018
ENSG00000102384	CENPI	8.35443	9.87149	8.92419	4.66593	3.77326	1.43946	0.720101	8.46358	14.452	15.4612	3.40104	7.54128	1.51063	0.674158	7.69676	9.35018	4.17235	4.92401	2.26735	0.556378
ENSG00000151849	CENPJ	8.10332	13.1542	9.30596	12.0961	10.0568	1.86784	2.43999	9.3995	13.947	13.937	13.6649	12.3805	2.86449	1.50265	10.4312	14.719	15.3478	9.77872	2.46057	1.46179
ENSG00000123219	CENPK	20.487	21.4261	27.3456	1.86044	0.664869	1.41355	2.12632	12.7068	26.2318	33.7766	2.51991	4.52406	2.75415	2.6065	22.0777	31.6916	5.18974	3.35591	6.60699	2.48543
ENSG00000120334	CENPL	6.99932	7.16331	8.49363	2.58622	1.55302	1.99999	0.320437	6.92531	9.99776	13.0414	2.6225	2.9994	1.79536	0.470374	6.17755	10.8519	1.18632	2.64873	1.33288	0.872004
ENSG00000100162	CENPM	2.75755	2.04567	1.99596	0.068191	0	0.085897	0.030387	2.44513	1.88468	0.648252	0	0.201333	0.180778	0.050369	2.57564	1.01679	0.074633	0.066289	0.266157	0.064734
ENSG00000166451	CENPN	21.0355	34.4917	26.0799	1.32447	0.818155	0.818456	2.22564	22.2549	37.7333	33.8052	0.822033	1.47442	1.28193	0.690124	26.3436	25.2015	2.57718	2.15067	1.10533	0.312428
ENSG00000138092	CENPO	9.07017	13.2244	8.804	3.59539	1.55141	0.877792	0.374015	11.0303	10.2684	7.6134	0.629825	1.41042	0.653865	0.544053	8.65401	8.03418	1.23424	1.73205	0.547382	0.288056
ENSG00000188312	CENPP	0.669955	0.737353	4.94306	0.145202	0.734414	0.122149	0.064401	1.82471	0.876356	0.793534	0.046593	0.14453	0.107832	0.089921	1.35187	1.64781	0.133181	0.155315	0.120545	0.07006
ENSG00000031691	CENPQ	14.9443	20.8553	32.6166	3.37697	2.51201	2.4229	3.00954	14.6737	26.6461	31.7262	2.94233	4.3601	3.17544	2.68769	18.2255	25.2518	5.63371	3.66509	2.74114	2.60513
ENSG00000175279	CENPS	6.39115	8.76969	8.63688	2.48619	2.62673	1.45245	1.35054	5.60153	7.86466	8.42434	2.44236	4.50182	1.78741	1.74438	7.74731	9.87015	3.47572	4.09227	2.93182	1.55377
[truncated: 11,851 more rows]
